# Supplementary material
Source: PubMed Central journal article supplement (PMC4439875)
Supplement: bph0172-2782-sd6.pdf [file bph0172-2782-sd6.pdf]

**SUPPLEMENTARY TABLE 2. Differentially enriched metabolic GO genes.**

The total number of nucleosomes within each gene from differentially enriched metabolic GO pathways determined using HOMER (Heinz et al. 2010) are listed for each treatment group by EntrezID, gene symbol and gene description.

| EntrezID  | Gene Symbol   | Gene Description           | Nucleosome Number |     |        |
|-----------|---------------|----------------------------|-------------------|-----|--------|
|           |               |                            | LF                | HF  | HF+NaB |
| 76251     | 0610007P08Rik | RIKEN cDNA 0610007P08 gene | 690               | 693 | 668    |
| 58520     | 0610007P14Rik | RIKEN cDNA 0610007P14 gene | 113               | 100 | 108    |
| 68327     | 0610007P22Rik | RIKEN cDNA 0610007P22 gene | 16                | 16  | 19     |
| 66055     | 0610009D07Rik | RIKEN cDNA 0610009D07 gene | 78                | 74  | 74     |
| 56700     | 0610031J06Rik | RIKEN cDNA 0610031J06 gene | 46                | 49  | 47     |
| 68550     | 1110002N22Rik | RIKEN cDNA 1110002N22 gene | 80                | 82  | 88     |
| 74319     | 1110005A03Rik | RIKEN cDNA 1110005A03 gene | 12                | 11  | 14     |
| 66132     | 1110008L16Rik | RIKEN cDNA 1110008L16 gene | 102               | 99  | 93     |
| 68497     | 1110018G07Rik | RIKEN cDNA 1110018G07 gene | 123               | 120 | 121    |
| 66129     | 1110018J18Rik | RIKEN cDNA 1110018J18 gene | 126               | 120 | 121    |
| 68646     | 1110020G09Rik | RIKEN cDNA 1110020G09 gene | 181               | 178 | 177    |
| 66179     | 1110031I02Rik | RIKEN cDNA 1110031I02 gene | 4                 | 3   | 2      |
| 68736     | 1110034B05Rik | RIKEN cDNA 1110034B05 gene | 470               | 471 | 478    |
| 66185     | 1110037F02Rik | RIKEN cDNA 1110037F02 gene | 230               | 232 | 233    |
| 66209     | 1110054O05Rik | RIKEN cDNA 1110054O05 gene | 229               | 232 | 231    |
| 76974     | 1190003J15Rik | RIKEN cDNA 1190003J15 gene | 31                | 32  | 29     |
| 98685     | 1190005F20Rik | RIKEN cDNA 1190005F20 gene | 98                | 96  | 95     |
| 74133     | 1200011M11Rik | RIKEN cDNA 1200011M11 gene | 45                | 49  | 44     |
| 71997     | 1500002O20Rik | RIKEN cDNA 1500002O20 gene | 93                | 94  | 93     |
| 68964     | 1500010J02Rik | RIKEN cDNA 1500010J02 gene | 49                | 47  | 50     |
| 78896     | 1500015O10Rik | RIKEN cDNA 1500015O10 gene | 486               | 504 | 468    |
| 76927     | 1700021C14Rik | RIKEN cDNA 1700021C14 gene | 60                | 53  | 60     |
| 100502698 | 1700021K19Rik | RIKEN cDNA 1700021K19 gene | 101               | 95  | 98     |
| 69382     | 1700024P04Rik | RIKEN cDNA 1700024P04 gene | 329               | 332 | 337    |
| 67334     | 1700054O13Rik | RIKEN cDNA 1700054O13 gene | 239               | 230 | 223    |
| 73582     | 1700106N22Rik | RIKEN cDNA 1700106N22 gene | 677               | 686 | 668    |
| 73626     | 1810009J06Rik | RIKEN cDNA 1810009J06 gene | 74                | 73  | 72     |
| 69064     | 1810014F10Rik | RIKEN cDNA 1810014F10 gene | 29                | 29  | 29     |
| 329509    | 1810024B03Rik | RIKEN cDNA 1810024B03 gene | 79                | 79  | 80     |
| 67490     | 1810074P20Rik | RIKEN cDNA 1810074P20 gene | 708               | 710 | 700    |
| 69816     | 2010001M09Rik | RIKEN cDNA 2010001M09 gene | 39                | 41  | 43     |
| 66552     | 2010106G01Rik | RIKEN cDNA 2010106G01 gene | 170               | 172 | 171    |
| 72061     | 2010111I01Rik | RIKEN cDNA 2010111I01 gene | 523               | 525 | 528    |
| 67373     | 2210010C04Rik | RIKEN cDNA 2210010C04 gene | 388               | 398 | 384    |
| 66526     | 2210012G02Rik | RIKEN cDNA 2210012G02 gene | 107               | 108 | 108    |
| 233545    | 2210018M11Rik | RIKEN cDNA 2210018M11 gene | 267               | 275 | 269    |
| 71881     | 2310001A20Rik | RIKEN cDNA 2310001A20 gene | 133               | 129 | 121    |
| 71885     | 2310003H01Rik | RIKEN cDNA 2310003H01 gene | 97                | 102 | 99     |
| 69487     | 2310003L22Rik | RIKEN cDNA 2310003L22 gene | 266               | 291 | 274    |
| 76947     | 2310030N02Rik | RIKEN cDNA 2310030N02 gene | 170               | 167 | 156    |
| 69596     | 2310035K24Rik | RIKEN cDNA 2310035K24 gene | 64                | 60  | 59     |
| 78323     | 2310046O06Rik | RIKEN cDNA 2310046O06 gene | 36                | 43  | 43     |
| 78890     | 2310079F23Rik | RIKEN cDNA 2310079F23 gene | 70                | 74  | 71     |
| 66991     | 2410004A20Rik | RIKEN cDNA 2410004A20 gene | 90                | 88  | 88     |
| 71952     | 2410016O06Rik | RIKEN cDNA 2410016O06 gene | 189               | 189 | 179    |
| 69709     | 2410017P09Rik | RIKEN cDNA 2410017P09 gene | 127               | 124 | 132    |
| 66423     | 2410022L05Rik | RIKEN cDNA 2410022L05 gene | 50                | 46  | 49     |
| 66511     | 2500003M10Rik | RIKEN cDNA 2500003M10 gene | 33                | 28  | 30     |

|           |               |                                                                    |      |      |      |
|-----------|---------------|--------------------------------------------------------------------|------|------|------|
| 70312     | 2510012J08Rik | RIKEN cDNA 2510012J08 gene                                         | 36   | 34   | 38   |
| 70415     | 2610018G03Rik | RIKEN cDNA 2610018G03 gene                                         | 382  | 382  | 369  |
| 77032     | 2610029I01Rik | RIKEN cDNA 2610029I01 gene                                         | 64   | 62   | 63   |
| 67958     | 2610101N10Rik | RIKEN cDNA 2610101N10 gene                                         | 207  | 196  | 189  |
| 214764    | 2700050L05Rik | RIKEN cDNA 2700050L05 gene                                         | 99   | 104  | 100  |
| 78832     | 2700078E11Rik | RIKEN cDNA 2700078E11 gene                                         | 373  | 374  | 377  |
| 72650     | 2810006K23Rik | RIKEN cDNA 2810006K23 gene                                         | 155  | 143  | 140  |
| 66469     | 2810405K02Rik | RIKEN cDNA 2810405K02 gene                                         | 75   | 74   | 78   |
| 381406    | 2810408M09Rik | RIKEN cDNA 2810408M09 gene                                         | 38   | 40   | 38   |
| 69962     | 2810422O20Rik | RIKEN cDNA 2810422O20 gene                                         | 74   | 82   | 68   |
| 72931     | 2900010J23Rik | RIKEN cDNA 2900010J23 gene                                         | 20   | 21   | 20   |
| 73218     | 3110056O03Rik | RIKEN cDNA 3110056O03 gene                                         | 27   | 26   | 29   |
| 403183    | 4832428D23Rik | RIKEN cDNA 4832428D23 gene                                         | 514  | 524  | 505  |
| 228151    | 4833423E24Rik | RIKEN cDNA 4833423E24 gene                                         | 185  | 183  | 179  |
| 320204    | 4833442J19Rik | RIKEN cDNA 4833442J19 gene                                         | 117  | 110  | 113  |
| 381393    | 4921509C19Rik | RIKEN cDNA 4921509C19 gene                                         | 508  | 505  | 515  |
| 66715     | 4921515J06Rik | RIKEN cDNA 4921515J06 gene                                         | 158  | 148  | 147  |
| 74653     | 4930444A02Rik | RIKEN cDNA 4930444A02 gene                                         | 51   | 49   | 55   |
| 214639    | 4930486L24Rik | RIKEN cDNA 4930486L24 gene                                         | 116  | 118  | 117  |
| 75106     | 4930519F16Rik | RIKEN cDNA 4930519F16 gene                                         | 156  | 158  | 157  |
| 75097     | 4930524E20Rik | RIKEN cDNA 4930524E20 gene                                         | 1823 | 1856 | 1761 |
| 71001     | 4931440L10Rik | RIKEN cDNA 4931440L10 gene                                         | 89   | 88   | 79   |
| 229227    | 4932438A13Rik | RIKEN cDNA 4932438A13 gene                                         | 467  | 465  | 482  |
| 237958    | 4933407P14Rik | RIKEN cDNA 4933407P14 gene                                         | 127  | 123  | 136  |
| 321000    | 4933421E11Rik | RIKEN cDNA 4933421E11 gene                                         | 344  | 367  | 344  |
| 99650     | 4933434E20Rik | RIKEN cDNA 4933434E20 gene                                         | 12   | 13   | 14   |
| 67555     | 4933434I20Rik | RIKEN cDNA 4933434I20 gene                                         | 66   | 69   | 70   |
| 71275     | 4933437F05Rik | RIKEN cDNA 4933437F05 gene                                         | 85   | 88   | 90   |
| 75731     | 5133401N09Rik | RIKEN cDNA 5133401N09 gene                                         | 107  | 110  | 114  |
| 229722    | 5330417C22Rik | RIKEN cDNA 5330417C22 gene                                         | 120  | 120  | 120  |
| 100502841 | 5430411K18Rik | RIKEN cDNA 5430411K18 gene                                         | 268  | 274  | 270  |
| 68251     | 5430437P03Rik | RIKEN cDNA 5430437P03 gene                                         | 13   | 13   | 10   |
| 70564     | 5730469M10Rik | RIKEN cDNA 5730469M10 gene                                         | 137  | 137  | 132  |
| 77011     | 5730590G19Rik | RIKEN cDNA 5730590G19 gene                                         | 134  | 122  | 123  |
| 67788     | 6330577E15Rik | RIKEN cDNA 6330577E15 gene                                         | 188  | 184  | 186  |
| 319582    | 6430573F11Rik | RIKEN cDNA 6430573F11 gene                                         | 460  | 478  | 458  |
| 328092    | 6530401N04Rik | RIKEN cDNA 6530401N04 gene                                         | 71   | 76   | 70   |
| 381572    | 9430007A20Rik | RIKEN cDNA 9430007A20 gene                                         | 132  | 129  | 130  |
| 68118     | 9430023L20Rik | RIKEN cDNA 9430023L20 gene                                         | 32   | 31   | 31   |
| 241134    | 9430031J16Rik | RIKEN cDNA 9430031J16 gene                                         | 1943 | 1955 | 1911 |
| 319801    | 9630033F20Rik | RIKEN cDNA 9630033F20 gene                                         | 104  | 98   | 97   |
| 320454    | 9930032O22Rik | RIKEN cDNA 9930032O22 gene                                         | 199  | 214  | 210  |
| 50518     | a             | nonagouti                                                          | 242  | 250  | 241  |
| 69865     | A1cf          | APOBEC1 complementation factor                                     | 430  | 436  | 414  |
| 216792    | A230051G13Rik | RIKEN cDNA A230051G13 gene                                         | 58   | 58   | 58   |
| 223267    | A2ld1         | AIG2-like domain 1                                                 | 577  | 566  | 579  |
| 232345    | A2m           | alpha-2-macroglobulin                                              | 471  | 476  | 464  |
| 215493    | A3galt2       | alpha 1,3-galactosyltransferase 2 (isoglobotriaosylceramide syntha | 97   | 97   | 95   |
| 239559    | A4galt        | alpha 1,4-galactosyltransferase                                    | 237  | 242  | 235  |
| 333424    | A4gnt         | alpha-1,4-N-acetylglucosaminyltransferase                          | 66   | 69   | 71   |
| 433294    | A530098C11Rik | RIKEN cDNA A530098C11 gene                                         | 208  | 213  | 206  |
| 223970    | A630055G03Rik | RIKEN cDNA A630055G03 gene                                         | 253  | 251  | 255  |
| 338371    | A730011L01Rik | RIKEN cDNA A730011L01 gene                                         | 204  | 206  | 195  |
| 227612    | A830007P12Rik | RIKEN cDNA A830007P12 gene                                         | 42   | 38   | 36   |
| 68169     | A930038C07Rik | RIKEN cDNA A930038C07 gene                                         | 242  | 235  | 233  |

|        |          |                                                                    |      |      |      |
|--------|----------|--------------------------------------------------------------------|------|------|------|
| 78894  | Aacs     | acetoacetyl-CoA synthetase                                         | 109  | 115  | 118  |
| 67758  | Aadac    | arylacetamide deacetylase (esterase)                               | 85   | 91   | 85   |
| 230883 | Aadacl3  | arylacetamide deacetylase-like 3                                   | 102  | 105  | 104  |
| 23923  | Aadat    | aminoadipate aminotransferase                                      | 2164 | 2156 | 2144 |
| 269774 | Aak1     | AP2 associated kinase 1                                            | 197  | 212  | 199  |
| 11298  | Aanat    | arylalkylamine N-acetyltransferase                                 | 55   | 52   | 55   |
| 234734 | Aars     | alanyl-tRNA synthetase                                             | 31   | 32   | 29   |
| 224805 | Aars2    | alanyl-tRNA synthetase 2, mitochondrial (putative)                 | 63   | 61   | 64   |
| 231326 | Aasdh    | aminoadipate-semialdehyde dehydrogenase                            | 150  | 139  | 143  |
| 67618  | Aasdhppt | aminoadipate-semialdehyde dehydrogenase-phosphopantetheinyl        | 987  | 997  | 977  |
| 30956  | Aass     | aminoadipate-semialdehyde synthase                                 | 460  | 479  | 474  |
| 56321  | Aatf     | apoptosis antagonizing transcription factor                        | 413  | 424  | 428  |
| 11302  | Aatk     | apoptosis-associated tyrosine kinase                               | 98   | 83   | 94   |
| 268860 | Abat     | 4-aminobutyrate aminotransferase                                   | 217  | 211  | 223  |
| 11303  | Abca1    | ATP-binding cassette, sub-family A (ABC1), member 1                | 331  | 327  | 330  |
| 381072 | Abca17   | ATP-binding cassette, sub-family A (ABC1), member 17               | 129  | 138  | 131  |
| 11305  | Abca2    | ATP-binding cassette, sub-family A (ABC1), member 2                | 22   | 22   | 23   |
| 27410  | Abca3    | ATP-binding cassette, sub-family A (ABC1), member 3                | 83   | 83   | 88   |
| 11304  | Abca4    | ATP-binding cassette, sub-family A (ABC1), member 4                | 374  | 369  | 368  |
| 27404  | Abca8b   | ATP-binding cassette, sub-family A (ABC1), member 8b               | 343  | 335  | 338  |
| 217262 | Abca9    | ATP-binding cassette, sub-family A (ABC1), member 9                | 198  | 207  | 195  |
| 18671  | Abcb1a   | ATP-binding cassette, sub-family B (MDR/TAP), member 1A            | 223  | 226  | 214  |
| 18669  | Abcb1b   | ATP-binding cassette, sub-family B (MDR/TAP), member 1B            | 297  | 292  | 296  |
| 18670  | Abcb4    | ATP-binding cassette, sub-family B (MDR/TAP), member 4             | 260  | 253  | 254  |
| 74104  | Abcb6    | ATP-binding cassette, sub-family B (MDR/TAP), member 6             | 26   | 30   | 26   |
| 17250  | Abcc1    | ATP-binding cassette, sub-family C (CFTR/MRP), member 1            | 319  | 311  | 320  |
| 12780  | Abcc2    | ATP-binding cassette, sub-family C (CFTR/MRP), member 2            | 114  | 109  | 108  |
| 76408  | Abcc3    | ATP-binding cassette, sub-family C (CFTR/MRP), member 3            | 185  | 179  | 191  |
| 27416  | Abcc5    | ATP-binding cassette, sub-family C (CFTR/MRP), member 5            | 227  | 226  | 210  |
| 27421  | Abcc6    | ATP-binding cassette, sub-family C (CFTR/MRP), member 6            | 131  | 131  | 133  |
| 19299  | Abcd3    | ATP-binding cassette, sub-family D (ALD), member 3                 | 295  | 289  | 294  |
| 224742 | Abcf1    | ATP-binding cassette, sub-family F (GCN20), member 1               | 24   | 26   | 23   |
| 11307  | Abcg1    | ATP-binding cassette, sub-family G (WHITE), member 1               | 226  | 214  | 218  |
| 26357  | Abcg2    | ATP-binding cassette, sub-family G (WHITE), member 2               | 463  | 463  | 464  |
| 27409  | Abcg5    | ATP-binding cassette, sub-family G (WHITE), member 5               | 71   | 69   | 73   |
| 67470  | Abcg8    | ATP-binding cassette, sub-family G (WHITE), member 8               | 138  | 135  | 132  |
| 213012 | Abhd10   | abhydrolase domain containing 10                                   | 154  | 156  | 156  |
| 193742 | Abhd16a  | abhydrolase domain containing 16A                                  | 27   | 28   | 26   |
| 105501 | Abhd4    | abhydrolase domain containing 4                                    | 40   | 45   | 47   |
| 67469  | Abhd5    | abhydrolase domain containing 5                                    | 351  | 363  | 357  |
| 11308  | Abi1     | abl-interactor 1                                                   | 233  | 214  | 215  |
| 329165 | Abi2     | abl-interactor 2                                                   | 292  | 295  | 289  |
| 11350  | Abi1     | c-abl oncogene 1, non-receptor tyrosine kinase                     | 283  | 275  | 279  |
| 11352  | Abi2     | v-abl Abelson murine leukemia viral oncogene homolog 2 (arg, Abi2) | 270  | 249  | 258  |
| 226251 | Ablim1   | actin-binding LIM protein 1                                        | 579  | 580  | 564  |
| 231148 | Ablim2   | actin-binding LIM protein 2                                        | 190  | 210  | 220  |
| 319713 | Ablim3   | actin binding LIM protein family, member 3                         | 210  | 218  | 213  |
| 80908  | Abo      | ABO blood group (transferase A, alpha 1-3-N-acetylgalactosaminyl)  | 308  | 308  | 310  |
| 76507  | Abp1     | amiloride binding protein 1 (amine oxidase, copper-containing)     | 124  | 128  | 130  |
| 223513 | Abra     | actin-binding Rho activating protein                               | 1085 | 1083 | 1044 |
| 30946  | Abt1     | activator of basal transcription 1                                 | 80   | 74   | 73   |
| 80283  | Abtb1    | ankyrin repeat and BTB (POZ) domain containing 1                   | 181  | 182  | 189  |
| 113868 | Acaa1a   | acetyl-Coenzyme A acyltransferase 1A                               | 20   | 24   | 20   |
| 235674 | Acaa1b   | acetyl-Coenzyme A acyltransferase 1B                               | 114  | 115  | 115  |
| 52538  | Acaa2    | acetyl-Coenzyme A acyltransferase 2 (mitochondrial 3-oxoacyl-CoA)  | 228  | 226  | 235  |

|        |        |                                                               |      |      |      |
|--------|--------|---------------------------------------------------------------|------|------|------|
| 107476 | Acaca  | acetyl-Coenzyme A carboxylase alpha                           | 448  | 455  | 450  |
| 100705 | Acacb  | acetyl-Coenzyme A carboxylase beta                            | 175  | 191  | 177  |
| 71985  | Acad10 | acyl-Coenzyme A dehydrogenase family, member 10               | 57   | 53   | 53   |
| 102632 | Acad11 | acyl-Coenzyme A dehydrogenase family, member 11               | 80   | 82   | 78   |
| 338350 | Acad12 | acyl-Coenzyme A dehydrogenase family, member 12               | 79   | 74   | 87   |
| 66948  | Acad8  | acyl-Coenzyme A dehydrogenase family, member 8                | 99   | 99   | 102  |
| 229211 | Acad9  | acyl-Coenzyme A dehydrogenase family, member 9                | 127  | 126  | 125  |
| 11363  | Acadl  | acyl-Coenzyme A dehydrogenase, long-chain                     | 150  | 145  | 147  |
| 11364  | Acadm  | acyl-Coenzyme A dehydrogenase, medium chain                   | 79   | 76   | 84   |
| 11409  | Acads  | acyl-Coenzyme A dehydrogenase, short chain                    | 157  | 164  | 166  |
| 66885  | Acadsb | acyl-Coenzyme A dehydrogenase, short/branched chain           | 160  | 173  | 166  |
| 11370  | Acadvl | acyl-Coenzyme A dehydrogenase, very long chain                | 9    | 8    | 9    |
| 11595  | Acan   | aggrecan                                                      | 284  | 284  | 275  |
| 216859 | Acap1  | ArfGAP with coiled-coil, ankyrin repeat and PH domains 1      | 26   | 25   | 24   |
| 110446 | Acat1  | acetyl-Coenzyme A acetyltransferase 1                         | 175  | 176  | 169  |
| 110460 | Acat2  | acetyl-Coenzyme A acetyltransferase 2                         | 68   | 63   | 62   |
| 224530 | Acat3  | acetyl-Coenzyme A acetyltransferase 3                         | 49   | 52   | 50   |
| 170760 | Acbd3  | acyl-Coenzyme A binding domain containing 3                   | 156  | 150  | 158  |
| 329470 | Accs   | 1-aminocyclopropane-1-carboxylate synthase homolog (Arabidops | 61   | 64   | 63   |
| 381411 | Accsl  | 1-aminocyclopropane-1-carboxylate synthase homolog (Arabidops | 138  | 139  | 144  |
| 497652 | Acd    | adrenocortical dysplasia                                      | 13   | 9    | 11   |
| 11421  | Ace    | angiotensin I converting enzyme (peptidyl-dipeptidase A) 1    | 84   | 86   | 76   |
| 70008  | Ace2   | angiotensin I converting enzyme (peptidyl-dipeptidase A) 2    | 203  | 209  | 199  |
| 171168 | Acer1  | alkaline ceramidase 1                                         | 70   | 69   | 73   |
| 230379 | Acer2  | alkaline ceramidase 2                                         | 487  | 474  | 483  |
| 66190  | Acer3  | alkaline ceramidase 3                                         | 211  | 197  | 202  |
| 11423  | Ache   | acetylcholinesterase                                          | 49   | 50   | 54   |
| 56215  | Acin1  | apoptotic chromatin condensation inducer 1                    | 81   | 78   | 82   |
| 104112 | Acly   | ATP citrate lyase                                             | 97   | 92   | 89   |
| 266645 | Acmsd  | amino carboxymuconate semialdehyde decarboxylase              | 120  | 131  | 124  |
| 230161 | Acnat1 | acyl-coenzyme A amino acid N-acyltransferase 1                | 131  | 123  | 120  |
| 209186 | Acnat2 | acyl-coenzyme A amino acid N-acyltransferase 2                | 485  | 498  | 487  |
| 11428  | Aco1   | aconitase 1                                                   | 1006 | 1009 | 1015 |
| 11429  | Aco2   | aconitase 2, mitochondrial                                    | 68   | 68   | 68   |
| 26897  | Acot1  | acyl-CoA thioesterase 1                                       | 64   | 65   | 69   |
| 64833  | Acot10 | acyl-CoA thioesterase 10                                      | 2829 | 2889 | 2808 |
| 329910 | Acot11 | acyl-CoA thioesterase 11                                      | 230  | 220  | 226  |
| 74156  | Acot12 | acyl-CoA thioesterase 12                                      | 346  | 340  | 341  |
| 171210 | Acot2  | acyl-CoA thioesterase 2                                       | 75   | 80   | 76   |
| 171281 | Acot3  | acyl-CoA thioesterase 3                                       | 40   | 38   | 38   |
| 171282 | Acot4  | acyl-CoA thioesterase 4                                       | 54   | 56   | 55   |
| 217698 | Acot5  | acyl-CoA thioesterase 5                                       | 56   | 62   | 63   |
| 217700 | Acot6  | acyl-CoA thioesterase 6                                       | 64   | 56   | 52   |
| 70025  | Acot7  | acyl-CoA thioesterase 7                                       | 179  | 166  | 175  |
| 170789 | Acot8  | acyl-CoA thioesterase 8                                       | 27   | 26   | 28   |
| 56360  | Acot9  | acyl-CoA thioesterase 9                                       | 154  | 156  | 150  |
| 11430  | Acox1  | acyl-Coenzyme A oxidase 1, palmitoyl                          | 22   | 22   | 23   |
| 93732  | Acox2  | acyl-Coenzyme A oxidase 2, branched chain                     | 129  | 119  | 120  |
| 80911  | Acox3  | acyl-Coenzyme A oxidase 3, pristanoyl                         | 136  | 130  | 136  |
| 74121  | Acoxl  | acyl-Coenzyme A oxidase-like                                  | 385  | 381  | 376  |
| 11431  | Acp1   | acid phosphatase 1, soluble                                   | 34   | 32   | 36   |
| 11432  | Acp2   | acid phosphatase 2, lysosomal                                 | 54   | 55   | 56   |
| 11433  | Acp5   | acid phosphatase 5, tartrate resistant                        | 63   | 62   | 61   |
| 56318  | Acpp   | acid phosphatase, prostate                                    | 221  | 211  | 211  |
| 11434  | Acr    | acrosin prepropeptide                                         | 109  | 114  | 106  |

|        |         |                                                               |      |      |      |
|--------|---------|---------------------------------------------------------------|------|------|------|
| 94180  | Acsbg1  | acyl-CoA synthetase bubblegum family member 1                 | 145  | 151  | 148  |
| 328845 | Acsbg2  | acyl-CoA synthetase bubblegum family member 2                 | 57   | 59   | 60   |
| 264895 | Acsf2   | acyl-CoA synthetase family member 2                           | 85   | 85   | 85   |
| 257633 | Acsf3   | acyl-CoA synthetase family member 3                           | 193  | 174  | 178  |
| 14081  | Acs11   | acyl-CoA synthetase long-chain family member 1                | 329  | 332  | 336  |
| 74205  | Acs13   | acyl-CoA synthetase long-chain family member 3                | 186  | 180  | 180  |
| 50790  | Acs14   | acyl-CoA synthetase long-chain family member 4                | 466  | 456  | 464  |
| 433256 | Acs15   | acyl-CoA synthetase long-chain family member 5                | 103  | 90   | 94   |
| 216739 | Acs16   | acyl-CoA synthetase long-chain family member 6                | 149  | 152  | 146  |
| 117147 | Acsm1   | acyl-CoA synthetase medium-chain family member 1              | 164  | 169  | 163  |
| 233799 | Acsm2   | acyl-CoA synthetase medium-chain family member 2              | 129  | 131  | 129  |
| 20216  | Acsm3   | acyl-CoA synthetase medium-chain family member 3              | 91   | 93   | 93   |
| 233801 | Acsm4   | acyl-CoA synthetase medium-chain family member 4              | 133  | 133  | 136  |
| 272428 | Acsm5   | acyl-CoA synthetase medium-chain family member 5              | 42   | 37   | 41   |
| 68738  | Acss1   | acyl-CoA synthetase short-chain family member 1               | 109  | 96   | 102  |
| 60525  | Acss2   | acyl-CoA synthetase short-chain family member 2               | 100  | 108  | 96   |
| 380660 | Acss3   | acyl-CoA synthetase short-chain family member 3               | 993  | 1031 | 985  |
| 11464  | Actc1   | actin, alpha, cardiac muscle 1                                | 52   | 49   | 48   |
| 56456  | Actl6a  | actin-like 6A                                                 | 159  | 164  | 161  |
| 83766  | Actl6b  | actin-like 6B                                                 | 52   | 46   | 43   |
| 109275 | Actr5   | ARP5 actin-related protein 5 homolog (yeast)                  | 31   | 34   | 34   |
| 56249  | Actr8   | ARP8 actin-related protein 8 homolog ( <i>S. cerevisiae</i> ) | 55   | 45   | 53   |
| 11477  | Acvr1   | activin A receptor, type 1                                    | 498  | 498  | 519  |
| 11479  | Acvr1b  | activin A receptor, type 1B                                   | 121  | 119  | 122  |
| 269275 | Acvr1c  | activin A receptor, type 1C                                   | 554  | 535  | 550  |
| 11480  | Acvr2a  | activin receptor IIA                                          | 4795 | 4884 | 4725 |
| 11481  | Acvr2b  | activin receptor IIB                                          | 110  | 112  | 107  |
| 11482  | Acvr11  | activin A receptor, type II-like 1                            | 75   | 79   | 71   |
| 109652 | Acy1    | aminoacylase 1                                                | 20   | 23   | 21   |
| 71670  | Acy3    | aspartoacylase (aminoacylase) 3                               | 26   | 23   | 25   |
| 11486  | Ada     | adenosine deaminase                                           | 161  | 155  | 164  |
| 21744  | Adad1   | adenosine deaminase domain containing 1 (testis specific)     | 334  | 334  | 325  |
| 75773  | Adad2   | adenosine deaminase domain containing 2                       | 36   | 33   | 35   |
| 75894  | Adal    | adenosine deaminase-like                                      | 41   | 40   | 40   |
| 11487  | Adam10  | a disintegrin and metalloproteinase domain 10                 | 350  | 346  | 339  |
| 11488  | Adam11  | a disintegrin and metalloproteinase domain 11                 | 131  | 129  | 127  |
| 11489  | Adam12  | a disintegrin and metalloproteinase domain 12 (meltrin alpha) | 741  | 757  | 776  |
| 11490  | Adam15  | a disintegrin and metalloproteinase domain 15 (metargidin)    | 35   | 30   | 36   |
| 11491  | Adam17  | a disintegrin and metalloproteinase domain 17                 | 134  | 133  | 121  |
| 13524  | Adam18  | a disintegrin and metalloproteinase domain 18                 | 162  | 161  | 161  |
| 11492  | Adam19  | a disintegrin and metalloproteinase domain 19 (meltrin beta)  | 155  | 154  | 145  |
| 280668 | Adam1a  | a disintegrin and metalloproteinase domain 1a                 | 53   | 55   | 54   |
| 280667 | Adam1b  | a disintegrin and metalloproteinase domain 1b                 | 79   | 73   | 82   |
| 11495  | Adam2   | a disintegrin and metalloproteinase domain 2                  | 154  | 143  | 147  |
| 56622  | Adam21  | a disintegrin and metalloproteinase domain 21                 | 86   | 83   | 76   |
| 11496  | Adam22  | a disintegrin and metalloproteinase domain 22                 | 462  | 460  | 457  |
| 23792  | Adam23  | a disintegrin and metalloproteinase domain 23                 | 503  | 508  | 529  |
| 13526  | Adam24  | a disintegrin and metalloproteinase domain 24 (testase 1)     | 143  | 148  | 138  |
| 23793  | Adam25  | a disintegrin and metalloproteinase domain 25 (testase 2)     | 145  | 147  | 150  |
| 13525  | Adam26a | a disintegrin and metalloproteinase domain 26A (testase 3)    | 131  | 131  | 127  |
| 382007 | Adam26b | a disintegrin and metalloproteinase domain 26B                | 346  | 356  | 346  |
| 13522  | Adam28  | a disintegrin and metalloproteinase domain 28                 | 575  | 561  | 565  |
| 11497  | Adam3   | a disintegrin and metalloproteinase domain 3 (cyritestin)     | 198  | 204  | 187  |
| 353188 | Adam32  | a disintegrin and metalloproteinase domain 32                 | 239  | 243  | 239  |
| 110751 | Adam33  | a disintegrin and metalloproteinase domain 33                 | 50   | 54   | 49   |

|                 |                                                                       |      |      |      |
|-----------------|-----------------------------------------------------------------------|------|------|------|
| 11499 Adam5     | a disintegrin and metallopeptidase domain 5                           | 289  | 277  | 284  |
| 11500 Adam7     | a disintegrin and metallopeptidase domain 7                           | 595  | 592  | 582  |
| 11501 Adam8     | a disintegrin and metallopeptidase domain 8                           | 72   | 75   | 74   |
| 11502 Adam9     | a disintegrin and metallopeptidase domain 9 (meltrin gamma)           | 81   | 83   | 86   |
| 58860 Adamdec1  | ADAM-like, decysin 1                                                  | 158  | 158  | 162  |
| 11504 Adamts1   | a disintegrin-like and metallopeptidase (reprolysin type) with throml | 447  | 447  | 436  |
| 224697 Adamts10 | a disintegrin-like and metallopeptidase (reprolysin type) with throml | 157  | 153  | 154  |
| 239337 Adamts12 | a disintegrin-like and metallopeptidase (reprolysin type) with throml | 452  | 459  | 454  |
| 279028 Adamts13 | a disintegrin-like and metallopeptidase (reprolysin type) with throml | 58   | 60   | 58   |
| 237360 Adamts14 | a disintegrin-like and metallopeptidase (reprolysin type) with throml | 154  | 160  | 157  |
| 235130 Adamts15 | a disintegrin-like and metallopeptidase (reprolysin type) with throml | 662  | 654  | 650  |
| 271127 Adamts16 | a disintegrin-like and metallopeptidase (reprolysin type) with throml | 1674 | 1712 | 1711 |
| 233332 Adamts17 | a disintegrin-like and metallopeptidase (reprolysin type) with throml | 619  | 614  | 622  |
| 208936 Adamts18 | a disintegrin-like and metallopeptidase (reprolysin type) with throml | 622  | 637  | 606  |
| 240322 Adamts19 | a disintegrin-like and metallopeptidase (reprolysin type) with throml | 484  | 520  | 493  |
| 216725 Adamts2  | a disintegrin-like and metallopeptidase (reprolysin type) with throml | 497  | 495  | 493  |
| 223838 Adamts20 | a disintegrin-like and metallopeptidase (reprolysin type) with throml | 1226 | 1229 | 1194 |
| 330119 Adamts3  | a disintegrin-like and metallopeptidase (reprolysin type) with throml | 773  | 778  | 769  |
| 240913 Adamts4  | a disintegrin-like and metallopeptidase (reprolysin type) with throml | 28   | 27   | 28   |
| 23794 Adamts5   | a disintegrin-like and metallopeptidase (reprolysin type) with throml | 1919 | 1964 | 1935 |
| 108154 Adamts6  | a disintegrin-like and metallopeptidase (reprolysin type) with throml | 750  | 732  | 732  |
| 108153 Adamts7  | a disintegrin-like and metallopeptidase (reprolysin type) with throml | 197  | 200  | 197  |
| 30806 Adamts8   | a disintegrin-like and metallopeptidase (reprolysin type) with throml | 141  | 138  | 145  |
| 101401 Adamts9  | a disintegrin-like and metallopeptidase (reprolysin type) with throml | 298  | 302  | 298  |
| 56417 Adar      | adenosine deaminase, RNA-specific                                     | 334  | 330  | 340  |
| 110532 Adarb1   | adenosine deaminase, RNA-specific, B1                                 | 200  | 199  | 197  |
| 94191 Adarb2    | adenosine deaminase, RNA-specific, B2                                 | 2861 | 2861 | 2783 |
| 30947 Adat1     | adenosine deaminase, tRNA-specific 1                                  | 93   | 91   | 99   |
| 66757 Adat2     | adenosine deaminase, tRNA-specific 2, TAD2 homolog (S. cerevis        | 66   | 72   | 67   |
| 100113398 Adat3 | adenosine deaminase, tRNA-specific 3, TAD2 homolog (S. cerevis        | 16   | 15   | 18   |
| 242669 Adc      | arginine decarboxylase                                                | 138  | 139  | 141  |
| 72113 Adck1     | aarF domain containing kinase 1                                       | 502  | 505  | 516  |
| 57869 Adck2     | aarF domain containing kinase 2                                       | 49   | 41   | 47   |
| 67426 Adck3     | aarF domain containing kinase 3                                       | 357  | 346  | 350  |
| 76889 Adck4     | aarF domain containing kinase 4                                       | 41   | 42   | 42   |
| 268822 Adck5    | aarF domain containing kinase 5                                       | 96   | 87   | 89   |
| 432530 Adcy1    | adenylate cyclase 1                                                   | 684  | 694  | 675  |
| 271639 Adcy10   | adenylate cyclase 10                                                  | 223  | 222  | 224  |
| 210044 Adcy2    | adenylate cyclase 2                                                   | 1193 | 1224 | 1187 |
| 104111 Adcy3    | adenylate cyclase 3                                                   | 192  | 207  | 202  |
| 104110 Adcy4    | adenylate cyclase 4                                                   | 27   | 28   | 26   |
| 224129 Adcy5    | adenylate cyclase 5                                                   | 435  | 433  | 440  |
| 11512 Adcy6     | adenylate cyclase 6                                                   | 79   | 73   | 73   |
| 11513 Adcy7     | adenylate cyclase 7                                                   | 236  | 240  | 224  |
| 11514 Adcy8     | adenylate cyclase 8                                                   | 1769 | 1778 | 1747 |
| 11515 Adcy9     | adenylate cyclase 9                                                   | 385  | 375  | 372  |
| 11516 Adcyap1   | adenylate cyclase activating polypeptide 1                            | 4592 | 4695 | 4585 |
| 11518 Add1      | adducin 1 (alpha)                                                     | 112  | 116  | 117  |
| 11522 Adh1      | alcohol dehydrogenase 1 (class I)                                     | 118  | 116  | 116  |
| 26876 Adh4      | alcohol dehydrogenase 4 (class II), pi polypeptide                    | 84   | 88   | 80   |
| 11532 Adh5      | alcohol dehydrogenase 5 (class III), chi polypeptide                  | 100  | 95   | 97   |
| 69117 Adh6a     | alcohol dehydrogenase 6A (class V)                                    | 122  | 120  | 128  |
| 11529 Adh7      | alcohol dehydrogenase 7 (class IV), mu or sigma polypeptide           | 118  | 118  | 123  |
| 76187 Adhfe1    | alcohol dehydrogenase, iron containing, 1                             | 75   | 71   | 69   |
| 104923 Adi1     | acireductone dioxygenase 1                                            | 128  | 140  | 133  |

|        |         |                                                                        |      |      |      |
|--------|---------|------------------------------------------------------------------------|------|------|------|
| 11450  | Adipoq  | adiponectin, C1Q and collagen domain containing                        | 117  | 122  | 116  |
| 72674  | Adipor1 | adiponectin receptor 1                                                 | 61   | 64   | 64   |
| 68465  | Adipor2 | adiponectin receptor 2                                                 | 191  | 202  | 192  |
| 11534  | Adk     | adenosine kinase                                                       | 559  | 566  | 573  |
| 11535  | Adm     | adrenomedullin                                                         | 208  | 206  | 198  |
| 11538  | Adnp    | activity-dependent neuroprotective protein                             | 191  | 183  | 191  |
| 240442 | Adnp2   | ADNP homeobox 2                                                        | 200  | 199  | 202  |
| 211488 | Ado     | 2-aminoethanethiol (cysteamine) dioxygenase                            | 477  | 495  | 468  |
| 11539  | Adora1  | adenosine A1 receptor                                                  | 123  | 123  | 116  |
| 11541  | Adora2b | adenosine A2b receptor                                                 | 255  | 263  | 264  |
| 72141  | Adpgk   | ADP-dependent glucokinase                                              | 418  | 395  | 420  |
| 11544  | Adprh   | ADP-ribosylarginine hydrolase                                          | 31   | 32   | 29   |
| 234072 | Adprh1  | ADP-ribosylhydrolase like 1                                            | 120  | 119  | 116  |
| 11548  | Adra1b  | adrenergic receptor, alpha 1b                                          | 846  | 845  | 831  |
| 11551  | Adra2a  | adrenergic receptor, alpha 2a                                          | 1454 | 1472 | 1464 |
| 11552  | Adra2b  | adrenergic receptor, alpha 2b                                          | 99   | 111  | 113  |
| 11553  | Adra2c  | adrenergic receptor, alpha 2c                                          | 363  | 360  | 368  |
| 11554  | Adrb1   | adrenergic receptor, beta 1                                            | 333  | 335  | 328  |
| 11555  | Adrb2   | adrenergic receptor, beta 2                                            | 486  | 477  | 478  |
| 110355 | Adrbk1  | adrenergic receptor kinase, beta 1                                     | 149  | 149  | 141  |
| 320129 | Adrbk2  | adrenergic receptor kinase, beta 2                                     | 227  | 216  | 216  |
| 56436  | Adrm1   | adhesion regulating molecule 1                                         | 126  | 133  | 130  |
| 11564  | Adsl    | adenylosuccinate lyase                                                 | 240  | 229  | 230  |
| 11566  | Adss    | adenylosuccinate synthetase, non muscle                                | 330  | 339  | 328  |
| 11565  | Adssl1  | adenylosuccinate synthetase like 1                                     | 70   | 69   | 66   |
| 11568  | Aebp1   | AE binding protein 1                                                   | 47   | 46   | 47   |
| 11569  | Aebp2   | AE binding protein 2                                                   | 1055 | 1046 | 1070 |
| 14797  | Aes     | amino-terminal enhancer of split                                       | 34   | 32   | 34   |
| 226250 | Afap112 | actin filament associated protein 1-like 2                             | 315  | 325  | 315  |
| 17355  | Aff1    | AF4/FMR2 family, member 1                                              | 336  | 330  | 332  |
| 14266  | Aff2    | AF4/FMR2 family, member 2                                              | 1507 | 1513 | 1410 |
| 16764  | Aff3    | AF4/FMR2 family, member 3                                              | 880  | 908  | 891  |
| 93736  | Aff4    | AF4/FMR2 family, member 4                                              | 126  | 124  | 127  |
| 114896 | Afg31   | AFG3(ATPase family gene 3)-like 1 (yeast)                              | 92   | 94   | 92   |
| 69597  | Afg32   | AFG3(ATPase family gene 3)-like 2 (yeast)                              | 98   | 99   | 98   |
| 71562  | Afmid   | arylformamidase                                                        | 22   | 21   | 17   |
| 11576  | Afp     | alpha fetoprotein                                                      | 72   | 71   | 79   |
| 11593  | Aga     | aspartylglucosaminidase                                                | 6160 | 6276 | 5962 |
| 347722 | Agap1   | ArfGAP with GTPase domain, ankyrin repeat and PH domain 1              | 788  | 783  | 799  |
| 216439 | Agap2   | ArfGAP with GTPase domain, ankyrin repeat and PH domain 2              | 60   | 47   | 53   |
| 213990 | Agap3   | ArfGAP with GTPase domain, ankyrin repeat and PH domain 3              | 88   | 92   | 86   |
| 244071 | Agbl1   | ATP/GTP binding protein-like 1                                         | 3482 | 3473 | 3450 |
| 271813 | Agbl2   | ATP/GTP binding protein-like 2                                         | 140  | 130  | 133  |
| 76223  | Agbl3   | ATP/GTP binding protein-like 3                                         | 188  | 190  | 188  |
| 78933  | Agbl4   | ATP/GTP binding protein-like 4                                         | 1289 | 1311 | 1308 |
| 231093 | Agbl5   | ATP/GTP binding protein-like 5                                         | 48   | 51   | 48   |
| 69923  | Agk     | acylglycerol kinase                                                    | 412  | 433  | 431  |
| 77559  | Agl     | amylase-1,6-glucosidase, 4-alpha-glucanotransferase                    | 201  | 187  | 182  |
| 75986  | Agmat   | agmatine ureohydrolase (agmatinase)                                    | 91   | 80   | 80   |
| 319660 | Agmo    | alkylglycerol monooxygenase                                            | 975  | 963  | 914  |
| 55979  | Agpat1  | 1-acylglycerol-3-phosphate O-acyltransferase 1 (lysophosphatidic acid) | 21   | 17   | 17   |
| 67512  | Agpat2  | 1-acylglycerol-3-phosphate O-acyltransferase 2 (lysophosphatidic acid) | 48   | 47   | 50   |
| 28169  | Agpat3  | 1-acylglycerol-3-phosphate O-acyltransferase 3                         | 229  | 210  | 231  |
| 68262  | Agpat4  | 1-acylglycerol-3-phosphate O-acyltransferase 4 (lysophosphatidic acid) | 1906 | 1894 | 1922 |
| 52123  | Agpat5  | 1-acylglycerol-3-phosphate O-acyltransferase 5 (lysophosphatidic acid) | 271  | 266  | 278  |

|        |          |                                                                     |      |      |      |
|--------|----------|---------------------------------------------------------------------|------|------|------|
| 102247 | Agpat6   | 1-acylglycerol-3-phosphate O-acyltransferase 6 (lysophosphatidic :) | 108  | 115  | 109  |
| 231510 | Agpat9   | 1-acylglycerol-3-phosphate O-acyltransferase 9                      | 1093 | 1107 | 1085 |
| 235386 | Agphd1   | aminoglycoside phosphotransferase domain containing 1               | 108  | 110  | 108  |
| 228061 | Agps     | alkylglycerone phosphate synthase                                   | 309  | 297  | 295  |
| 11603  | Agrn     | agrln                                                               | 115  | 120  | 117  |
| 11606  | Agt      | angiotensinogen (serpin peptidase inhibitor, clade A, member 8)     | 74   | 68   | 79   |
| 67269  | Agtpbp1  | ATP/GTP binding protein 1                                           | 1012 | 981  | 978  |
| 11607  | Agtr1a   | angiotensin II receptor, type 1a                                    | 516  | 520  | 516  |
| 11609  | Agtr2    | angiotensin II receptor, type 2                                     | 419  | 423  | 410  |
| 11611  | Agxt     | alanine-glyoxylate aminotransferase                                 | 74   | 76   | 74   |
| 268782 | Agxt2    | alanine-glyoxylate aminotransferase 2                               | 367  | 376  | 371  |
| 226747 | Ahctf1   | AT hook containing transcription factor 1                           | 382  | 386  | 383  |
| 269378 | Ahcy     | S-adenosylhomocysteine hydrolase                                    | 161  | 156  | 154  |
| 229709 | Ahcy1    | S-adenosylhomocysteine hydrolase-like 1                             | 167  | 161  | 164  |
| 74340  | Ahcy2    | S-adenosylhomocysteine hydrolase-like 2                             | 356  | 350  | 351  |
| 11622  | Ahr      | aryl-hydrocarbon receptor                                           | 982  | 1000 | 952  |
| 11624  | Ahrr     | aryl-hydrocarbon receptor repressor                                 | 142  | 151  | 139  |
| 106821 | AI314976 | expressed sequence AI314976                                         | 32   | 28   | 26   |
| 107197 | AI462493 | expressed sequence AI462493                                         | 23   | 22   | 20   |
| 329828 | AI464131 | expressed sequence AI464131                                         | 51   | 48   | 53   |
| 11628  | Aicda    | activation-induced cytidine deaminase                               | 116  | 116  | 117  |
| 11629  | Aif1     | allograft inflammatory factor 1                                     | 29   | 28   | 30   |
| 26926  | Aifm1    | apoptosis-inducing factor, mitochondrion-associated 1               | 69   | 68   | 67   |
| 71361  | Aifm2    | apoptosis-inducing factor, mitochondrion-associated 2               | 122  | 125  | 134  |
| 72168  | Aifm3    | apoptosis-inducing factor, mitochondrion-associated 3               | 75   | 76   | 71   |
| 231872 | Aimp2    | aminoacyl tRNA synthetase complex-interacting multifunctional prc   | 19   | 20   | 17   |
| 11632  | Aip      | aryl-hydrocarbon receptor-interacting protein                       | 29   | 32   | 31   |
| 114230 | Aipl1    | aryl hydrocarbon receptor-interacting protein-like 1                | 390  | 380  | 385  |
| 11634  | Aire     | autoimmune regulator (autoimmune polyendocrinopathy candidiasi      | 10   | 8    | 12   |
| 104103 | Airn     | antisense Igf2r RNA                                                 | 123  | 127  | 122  |
| 11636  | Ak1      | adenylate kinase 1                                                  | 57   | 55   | 62   |
| 11637  | Ak2      | adenylate kinase 2                                                  | 121  | 120  | 126  |
| 56248  | Ak3      | adenylate kinase 3                                                  | 66   | 67   | 69   |
| 11639  | Ak4      | adenylate kinase 4                                                  | 195  | 198  | 190  |
| 229949 | Ak5      | adenylate kinase 5                                                  | 399  | 406  | 405  |
| 78801  | Ak7      | adenylate kinase 7                                                  | 132  | 134  | 129  |
| 68870  | Ak8      | adenylate kinase 8                                                  | 44   | 48   | 43   |
| 11640  | Akap1    | A kinase (PRKA) anchor protein 1                                    | 318  | 318  | 335  |
| 83397  | Akap12   | A kinase (PRKA) anchor protein (gravin) 12                          | 561  | 540  | 533  |
| 434756 | Akap14   | A kinase (PRKA) anchor protein 14                                   | 77   | 78   | 67   |
| 338351 | Akap17b  | A kinase (PRKA) anchor protein 17B                                  | 170  | 178  | 183  |
| 11643  | Akap4    | A kinase (PRKA) anchor protein 4                                    | 174  | 177  | 166  |
| 238276 | Akap5    | A kinase (PRKA) anchor protein 5                                    | 146  | 157  | 148  |
| 56399  | Akap8    | A kinase (PRKA) anchor protein 8                                    | 87   | 83   | 83   |
| 54194  | Akap8l   | A kinase (PRKA) anchor protein 8-like                               | 86   | 78   | 84   |
| 433693 | Akirin2  | akirin 2                                                            | 538  | 530  | 551  |
| 100182 | Akna     | AT-hook transcription factor                                        | 87   | 86   | 89   |
| 11648  | Akp3     | alkaline phosphatase 3, intestine, not Mn requiring                 | 69   | 70   | 70   |
| 58810  | Akr1a4   | aldo-keto reductase family 1, member A4 (aldehyde reductase)        | 82   | 76   | 84   |
| 11677  | Akr1b3   | aldo-keto reductase family 1, member B3 (aldose reductase)          | 50   | 52   | 47   |
| 11997  | Akr1b7   | aldo-keto reductase family 1, member B7                             | 124  | 125  | 120  |
| 14187  | Akr1b8   | aldo-keto reductase family 1, member B8                             | 89   | 85   | 84   |
| 622402 | Akr1c12  | aldo-keto reductase family 1, member C12                            | 245  | 251  | 241  |
| 27384  | Akr1c13  | aldo-keto reductase family 1, member C13                            | 102  | 103  | 103  |
| 105387 | Akr1c14  | aldo-keto reductase family 1, member C14                            | 260  | 269  | 261  |

|        |          |                                                                    |      |      |      |
|--------|----------|--------------------------------------------------------------------|------|------|------|
| 105349 | Akr1c18  | aldo-keto reductase family 1, member C18                           | 167  | 166  | 159  |
| 116852 | Akr1c20  | aldo-keto reductase family 1, member C20                           | 188  | 178  | 176  |
| 77337  | Akr1c21  | aldo-keto reductase family 1, member C21                           | 101  | 111  | 102  |
| 83702  | Akr1c6   | aldo-keto reductase family 1, member C6                            | 309  | 322  | 300  |
| 208665 | Akr1d1   | aldo-keto reductase family 1, member D1                            | 548  | 578  | 544  |
| 56043  | Akr1e1   | aldo-keto reductase family 1, member E1                            | 1610 | 1619 | 1593 |
| 110198 | Akr7a5   | aldo-keto reductase family 7, member A5 (aflatoxin aldehyde reduc  | 51   | 52   | 57   |
| 11651  | Akt1     | thymoma viral proto-oncogene 1                                     | 37   | 36   | 37   |
| 11652  | Akt2     | thymoma viral proto-oncogene 2                                     | 139  | 143  | 140  |
| 23797  | Akt3     | thymoma viral proto-oncogene 3                                     | 790  | 783  | 771  |
| 14339  | Aktip    | thymoma viral proto-oncogene 1 interacting protein                 | 319  | 315  | 323  |
| 17025  | Alad     | aminolevulinate, delta-, dehydratase                               | 26   | 29   | 26   |
| 11655  | Alas1    | aminolevulinic acid synthase 1                                     | 77   | 76   | 76   |
| 11656  | Alas2    | aminolevulinic acid synthase 2, erythroid                          | 158  | 158  | 147  |
| 69748  | Aldh16a1 | aldehyde dehydrogenase 16 family, member A1                        | 12   | 14   | 13   |
| 56454  | Aldh18a1 | aldehyde dehydrogenase 18 family, member A1                        | 127  | 126  | 126  |
| 11668  | Aldh1a1  | aldehyde dehydrogenase family 1, subfamily A1                      | 299  | 315  | 290  |
| 19378  | Aldh1a2  | aldehyde dehydrogenase family 1, subfamily A2                      | 406  | 404  | 418  |
| 56847  | Aldh1a3  | aldehyde dehydrogenase family 1, subfamily A3                      | 381  | 392  | 382  |
| 26358  | Aldh1a7  | aldehyde dehydrogenase family 1, subfamily A7                      | 466  | 456  | 444  |
| 72535  | Aldh1b1  | aldehyde dehydrogenase 1 family, member B1                         | 192  | 185  | 190  |
| 107747 | Aldh1I1  | aldehyde dehydrogenase 1 family, member L1                         | 193  | 173  | 184  |
| 216188 | Aldh1I2  | aldehyde dehydrogenase 1 family, member L2                         | 245  | 237  | 234  |
| 11669  | Aldh2    | aldehyde dehydrogenase 2, mitochondrial                            | 94   | 87   | 100  |
| 11670  | Aldh3a1  | aldehyde dehydrogenase family 3, subfamily A1                      | 110  | 122  | 118  |
| 11671  | Aldh3a2  | aldehyde dehydrogenase family 3, subfamily A2                      | 173  | 176  | 172  |
| 67689  | Aldh3b1  | aldehyde dehydrogenase 3 family, member B1                         | 28   | 28   | 31   |
| 621603 | Aldh3b2  | aldehyde dehydrogenase 3 family, member B2                         | 65   | 65   | 62   |
| 212647 | Aldh4a1  | aldehyde dehydrogenase 4 family, member A1                         | 97   | 102  | 105  |
| 214579 | Aldh5a1  | aldehyde dehydrogenase family 5, subfamily A1                      | 133  | 126  | 132  |
| 104776 | Aldh6a1  | aldehyde dehydrogenase family 6, subfamily A1                      | 39   | 45   | 44   |
| 110695 | Aldh7a1  | aldehyde dehydrogenase family 7, member A1                         | 200  | 189  | 186  |
| 237320 | Aldh8a1  | aldehyde dehydrogenase 8 family, member A1                         | 370  | 372  | 393  |
| 56752  | Aldh9a1  | aldehyde dehydrogenase 9, subfamily A1                             | 111  | 113  | 116  |
| 11674  | Aldoa    | aldolase A, fructose-bisphosphate                                  | 31   | 28   | 30   |
| 353204 | Aldoart1 | aldolase 1 A retrogene 1                                           | 1472 | 1546 | 1493 |
| 79459  | Aldoart2 | aldolase 1 A retrogene 2                                           | 139  | 134  | 139  |
| 230163 | Aldob    | aldolase B, fructose-bisphosphate                                  | 95   | 101  | 106  |
| 11676  | Aldoc    | aldolase C, fructose-bisphosphate                                  | 33   | 38   | 37   |
| 208211 | Alg1     | asparagine-linked glycosylation 1 homolog (yeast, beta-1,4-manno   | 45   | 42   | 40   |
| 207958 | Alg11    | asparagine-linked glycosylation 11 homolog (yeast, alpha-1,2-man   | 81   | 88   | 89   |
| 223774 | Alg12    | asparagine-linked glycosylation 12 homolog (yeast, alpha-1,6-man   | 89   | 92   | 88   |
| 67574  | Alg13    | asparagine-linked glycosylation 13 homolog (S. cerevisiae)         | 180  | 188  | 184  |
| 56737  | Alg2     | asparagine-linked glycosylation 2 homolog (yeast, alpha-1,3-mann   | 157  | 156  | 147  |
| 320438 | Alg6     | asparagine-linked glycosylation 6 homolog (yeast, alpha-1,3,-glucc | 228  | 233  | 213  |
| 381903 | Alg8     | asparagine-linked glycosylation 8 homolog (yeast, alpha-1,3-gluco: | 80   | 91   | 91   |
| 102580 | Alg9     | asparagine-linked glycosylation 9 homolog (yeast, alpha 1,2 mann   | 114  | 105  | 114  |
| 11682  | Alk      | anaplastic lymphoma kinase                                         | 1363 | 1355 | 1351 |
| 211064 | Alkbh1   | alkB, alkylation repair homolog 1 (E. coli)                        | 6    | 7    | 8    |
| 231642 | Alkbh2   | alkB, alkylation repair homolog 2 (E. coli)                        | 37   | 40   | 36   |
| 69113  | Alkbh3   | alkB, alkylation repair homolog 3 (E. coli)                        | 256  | 264  | 271  |
| 72041  | Alkbh4   | alkB, alkylation repair homolog 4 (E. coli)                        | 44   | 44   | 45   |
| 268420 | Alkbh5   | alkB, alkylation repair homolog 5 (E. coli)                        | 293  | 290  | 296  |
| 66400  | Alkbh7   | alkB, alkylation repair homolog 7 (E. coli)                        | 11   | 10   | 13   |
| 67667  | Alkbh8   | alkB, alkylation repair homolog 8 (E. coli)                        | 270  | 256  | 260  |

|           |         |                                                            |      |      |      |
|-----------|---------|------------------------------------------------------------|------|------|------|
| 94041     | Allc    | allantoicase                                               | 87   | 91   | 97   |
| 236266    | Alms1   | Alstrom syndrome 1 homolog (human)                         | 317  | 339  | 313  |
| 11684     | Alox12  | arachidonate 12-lipoxygenase                               | 104  | 116  | 114  |
| 11686     | Alox12b | arachidonate 12-lipoxygenase, 12R type                     | 90   | 89   | 95   |
| 11685     | Alox12e | arachidonate lipoxygenase, epidermal                       | 130  | 129  | 120  |
| 11687     | Alox15  | arachidonate 15-lipoxygenase                               | 105  | 109  | 113  |
| 11689     | Alox5   | arachidonate 5-lipoxygenase                                | 201  | 202  | 199  |
| 11690     | Alox5ap | arachidonate 5-lipoxygenase activating protein             | 268  | 260  | 268  |
| 11688     | Alox8   | arachidonate 8-lipoxygenase                                | 98   | 104  | 97   |
| 23801     | Aloxe3  | arachidonate lipoxygenase 3                                | 46   | 45   | 48   |
| 76768     | Alpi    | alkaline phosphatase, intestinal                           | 46   | 44   | 42   |
| 71481     | Alpk1   | alpha-kinase 1                                             | 200  | 207  | 203  |
| 11647     | Alpl    | alkaline phosphatase, liver/bone/kidney                    | 224  | 222  | 230  |
| 11650     | Alpl2   | alkaline phosphatase, placental-like 2                     | 514  | 516  | 501  |
| 74018     | Als2    | amyotrophic lateral sclerosis 2 (juvenile) homolog (human) | 121  | 117  | 115  |
| 216285    | Alx1    | ALX homeobox 1                                             | 906  | 922  | 872  |
| 11694     | Alx3    | aristaless-like homeobox 3                                 | 101  | 96   | 90   |
| 11695     | Alx4    | aristaless-like homeobox 4                                 | 468  | 449  | 470  |
| 17117     | Amacr   | alpha-methylacyl-CoA racemase                              | 67   | 58   | 56   |
| 11699     | Ambp    | alpha 1 microglobulin/bikunin                              | 269  | 275  | 258  |
| 228361    | Ambra1  | autophagy/beclin 1 regulator 1                             | 292  | 276  | 281  |
| 11702     | Amd1    | S-adenosylmethionine decarboxylase 1                       | 58   | 59   | 62   |
| 100041585 | Amd2    | S-adenosylmethionine decarboxylase 2                       | 50   | 55   | 55   |
| 71761     | Amdhd1  | amidohydrolase domain containing 1                         | 66   | 67   | 71   |
| 245847    | Amdhd2  | amidohydrolase domain containing 2                         | 37   | 35   | 37   |
| 23802     | Amfr    | autocrine motility factor receptor                         | 303  | 284  | 286  |
| 11705     | Amh     | anti-Mullerian hormone                                     | 16   | 13   | 15   |
| 110542    | Amhr2   | anti-Mullerian hormone type 2 receptor                     | 75   | 71   | 72   |
| 109674    | Ampd2   | adenosine monophosphate deaminase 2                        | 59   | 60   | 65   |
| 11717     | Ampd3   | adenosine monophosphate deaminase 3                        | 287  | 286  | 287  |
| 434437    | Amt     | aminomethyltransferase                                     | 18   | 21   | 22   |
| 11722     | Amy1    | amylase 1, salivary                                        | 189  | 194  | 183  |
| 109959    | Amy2a5  | amylase 2a5                                                | 301  | 288  | 293  |
| 231842    | Amz1    | archaelysin family metallopeptidase 1                      | 164  | 159  | 154  |
| 13929     | Amz2    | archaelysin family metallopeptidase 2                      | 136  | 139  | 137  |
| 17222     | Anapc1  | anaphase promoting complex subunit 1                       | 353  | 367  | 349  |
| 68999     | Anapc10 | anaphase promoting complex subunit 10                      | 450  | 445  | 445  |
| 66156     | Anapc11 | anaphase promoting complex subunit 11                      | 13   | 12   | 14   |
| 69010     | Anapc13 | anaphase promoting complex subunit 13                      | 122  | 130  | 119  |
| 99152     | Anapc2  | anaphase promoting complex subunit 2                       | 22   | 22   | 19   |
| 52206     | Anapc4  | anaphase promoting complex subunit 4                       | 343  | 352  | 344  |
| 59008     | Anapc5  | anaphase-promoting complex subunit 5                       | 92   | 93   | 87   |
| 56317     | Anapc7  | anaphase promoting complex subunit 7                       | 151  | 139  | 142  |
| 11727     | Ang     | angiogenin, ribonuclease, RNase A family, 5                | 31   | 30   | 29   |
| 11730     | Ang3    | angiogenin, ribonuclease A family, member 3                | 43   | 45   | 43   |
| 219033    | Ang4    | angiogenin, ribonuclease A family, member 4                | 112  | 108  | 110  |
| 503844    | Ang5    | angiogenin, ribonuclease A family, member 5                | 56   | 61   | 58   |
| 630952    | Ang6    | angiogenin, ribonuclease A family, member 6                | 198  | 188  | 180  |
| 11600     | Angpt1  | angiopoietin 1                                             | 1651 | 1704 | 1669 |
| 11602     | Angpt4  | angiopoietin 4                                             | 157  | 164  | 165  |
| 30924     | Angptl3 | angiopoietin-like 3                                        | 262  | 263  | 241  |
| 11733     | Ank1    | ankyrin 1, erythroid                                       | 471  | 461  | 473  |
| 244859    | Ankk1   | ankyrin repeat and kinase domain containing 1              | 192  | 192  | 181  |
| 107765    | Ankrd1  | ankyrin repeat domain 1 (cardiac muscle)                   | 376  | 366  | 388  |
| 78321     | Ankrd23 | ankyrin repeat domain 23                                   | 45   | 46   | 43   |

|        |           |                                                                    |      |      |      |
|--------|-----------|--------------------------------------------------------------------|------|------|------|
| 56503  | Ankrd49   | ankyrin repeat domain 49                                           | 17   | 17   | 18   |
| 11737  | Anp32a    | acidic (leucine-rich) nuclear phosphoprotein 32 family, member A   | 323  | 308  | 321  |
| 16790  | Anpep     | alanyl (membrane) aminopeptidase                                   | 135  | 139  | 141  |
| 16952  | Anxa1     | annexin A1                                                         | 1725 | 1742 | 1728 |
| 11745  | Anxa3     | annexin A3                                                         | 792  | 823  | 780  |
| 27052  | Aoah      | acyloxyacyl hydrolase                                              | 773  | 796  | 763  |
| 237940 | Aoc2      | amine oxidase, copper containing 2 (retina-specific)               | 16   | 18   | 18   |
| 11754  | Aoc3      | amine oxidase, copper containing 3                                 | 52   | 54   | 56   |
| 11761  | Aox1      | aldehyde oxidase 1                                                 | 151  | 158  | 155  |
| 71724  | Aox3      | aldehyde oxidase 3                                                 | 239  | 241  | 243  |
| 71872  | Aox4      | aldehyde oxidase 4                                                 | 221  | 218  | 208  |
| 11783  | Apaf1     | apoptotic peptidase activating factor 1                            | 667  | 638  | 661  |
| 11785  | Apbp1     | amyloid beta (A4) precursor protein-binding, family B, member 1    | 59   | 58   | 59   |
| 11789  | Apc       | adenomatous polyposis coli                                         | 433  | 432  | 415  |
| 11792  | Apex1     | apurinic/aprimidinic endonuclease 1                                | 8    | 7    | 8    |
| 77622  | Apex2     | apurinic/aprimidinic endonuclease 2                                | 50   | 49   | 50   |
| 226548 | Aph1a     | anterior pharynx defective 1a homolog (C. elegans)                 | 15   | 17   | 13   |
| 208117 | Aph1b     | anterior pharynx defective 1b homolog (C. elegans)                 | 158  | 161  | 160  |
| 68318  | Aph1c     | anterior pharynx defective 1c homolog (C. elegans)                 | 157  | 165  | 160  |
| 56369  | Apip      | APAF1 interacting protein                                          | 296  | 299  | 299  |
| 69928  | Apitd1    | apoptosis-inducing, TAF9-like domain 1                             | 52   | 52   | 50   |
| 72103  | Aplf      | aprataxin and PNKP like factor                                     | 181  | 179  | 175  |
| 11803  | Aplp1     | amyloid beta (A4) precursor-like protein 1                         | 39   | 43   | 44   |
| 11806  | Apoa1     | apolipoprotein A-I                                                 | 291  | 304  | 294  |
| 11807  | Apoa2     | apolipoprotein A-II                                                | 17   | 16   | 15   |
| 11808  | Apoa4     | apolipoprotein A-IV                                                | 44   | 43   | 43   |
| 66113  | Apoa5     | apolipoprotein A-V                                                 | 41   | 40   | 39   |
| 238055 | Apob      | apolipoprotein B                                                   | 3654 | 3641 | 3641 |
| 11810  | Apobec1   | apolipoprotein B mRNA editing enzyme, catalytic polypeptide 1      | 77   | 73   | 73   |
| 11811  | Apobec2   | apolipoprotein B mRNA editing enzyme, catalytic polypeptide 2      | 56   | 56   | 50   |
| 71281  | Apobec4   | apolipoprotein B mRNA editing enzyme, catalytic polypeptide-like 4 | 181  | 188  | 179  |
| 171504 | Apobr     | apolipoprotein B receptor                                          | 15   | 17   | 11   |
| 11812  | Apoc1     | apolipoprotein C-I                                                 | 23   | 24   | 22   |
| 11813  | Apoc2     | apolipoprotein C-II                                                | 19   | 18   | 23   |
| 11814  | Apoc3     | apolipoprotein C-III                                               | 15   | 15   | 16   |
| 11816  | Apoe      | apolipoprotein E                                                   | 29   | 25   | 26   |
| 103161 | Apof      | apolipoprotein F                                                   | 23   | 20   | 23   |
| 11818  | Apoh      | apolipoprotein H                                                   | 109  | 108  | 104  |
| 55938  | Apom      | apolipoprotein M                                                   | 14   | 13   | 13   |
| 11820  | App       | amyloid beta (A4) precursor protein                                | 911  | 931  | 911  |
| 11821  | Aprt      | adenine phosphoribosyl transferase                                 | 53   | 53   | 54   |
| 66408  | Aptx      | aprataxin                                                          | 312  | 304  | 318  |
| 11826  | Aqp1      | aquaporin 1                                                        | 231  | 217  | 221  |
| 11834  | Aqr       | aquarius                                                           | 182  | 184  | 185  |
| 11835  | Ar        | androgen receptor                                                  | 1743 | 1791 | 1708 |
| 11836  | Araf      | v-raf murine sarcoma 3611 viral oncogene homolog                   | 203  | 202  | 198  |
| 69710  | Arap1     | ArfGAP with RhoGAP domain, ankyrin repeat and PH domain 1          | 189  | 180  | 190  |
| 11839  | Areg      | amphiregulin                                                       | 401  | 430  | 418  |
| 11845  | Arf6      | ADP-ribosylation factor 6                                          | 148  | 154  | 149  |
| 11846  | Arg1      | arginase, liver                                                    | 544  | 543  | 548  |
| 11847  | Arg2      | arginase type II                                                   | 108  | 109  | 109  |
| 239027 | Arhgap22  | Rho GTPase activating protein 22                                   | 354  | 333  | 338  |
| 72754  | Arhgef10l | Rho guanine nucleotide exchange factor (GEF) 10-like               | 600  | 580  | 611  |
| 213498 | Arhgef11  | Rho guanine nucleotide exchange factor (GEF) 11                    | 276  | 287  | 286  |
| 93760  | Arid1a    | AT rich interactive domain 1A (SWI-like)                           | 274  | 277  | 275  |

|        |        |                                                                 |      |      |      |
|--------|--------|-----------------------------------------------------------------|------|------|------|
| 77044  | Arid2  | AT rich interactive domain 2 (ARID, RFX-like)                   | 232  | 231  | 233  |
| 13496  | Arid3a | AT rich interactive domain 3A (BRIGHT-like)                     | 52   | 46   | 48   |
| 56380  | Arid3b | AT rich interactive domain 3B (BRIGHT-like)                     | 185  | 184  | 192  |
| 550619 | Arid3c | AT rich interactive domain 3C (BRIGHT-like)                     | 19   | 24   | 20   |
| 238247 | Arid4a | AT rich interactive domain 4A (RBP1-like)                       | 184  | 177  | 170  |
| 94246  | Arid4b | AT rich interactive domain 4B (RBP1-like)                       | 581  | 576  | 588  |
| 214855 | Arid5a | AT rich interactive domain 5A (MRF1-like)                       | 123  | 119  | 126  |
| 71371  | Arid5b | AT rich interactive domain 5B (MRF1-like)                       | 726  | 746  | 736  |
| 23806  | Arih1  | ariadne ubiquitin-conjugating enzyme E2 binding protein homolog | 218  | 218  | 215  |
| 23807  | Arih2  | ariadne homolog 2 (Drosophila)                                  | 83   | 74   | 82   |
| 56327  | Arl2   | ADP-ribosylation factor-like 2                                  | 39   | 45   | 43   |
| 107566 | Arl2bp | ADP-ribosylation factor-like 2 binding protein                  | 121  | 131  | 125  |
| 11861  | Arl4a  | ADP-ribosylation factor-like 4A                                 | 1742 | 1726 | 1700 |
| 56297  | Arl6   | ADP-ribosylation factor-like 6                                  | 1330 | 1336 | 1316 |
| 71703  | Armcx3 | armadillo repeat containing, X-linked 3                         | 63   | 71   | 69   |
| 11863  | Arnt   | aryl hydrocarbon receptor nuclear translocator                  | 90   | 88   | 91   |
| 11864  | Arnt2  | aryl hydrocarbon receptor nuclear translocator 2                | 592  | 573  | 569  |
| 11865  | Arntl  | aryl hydrocarbon receptor nuclear translocator-like             | 539  | 541  | 539  |
| 272322 | Arntl2 | aryl hydrocarbon receptor nuclear translocator-like 2           | 161  | 157  | 155  |
| 109689 | Arrb1  | arrestin, beta 1                                                | 84   | 88   | 85   |
| 216869 | Arrb2  | arrestin, beta 2                                                | 50   | 54   | 54   |
| 11883  | Arsa   | arylsulfatase A                                                 | 57   | 57   | 62   |
| 11881  | Arsb   | arylsulfatase B                                                 | 488  | 512  | 493  |
| 74008  | Arsg   | arylsulfatase G                                                 | 177  | 176  | 174  |
| 545260 | Arsi   | arylsulfatase i                                                 | 94   | 93   | 91   |
| 271970 | Arsj   | arylsulfatase J                                                 | 831  | 857  | 826  |
| 77041  | Arsk   | arylsulfatase K                                                 | 51   | 53   | 55   |
| 11870  | Art1   | ADP-ribosyltransferase 1                                        | 21   | 20   | 22   |
| 11872  | Art2b  | ADP-ribosyltransferase 2b                                       | 136  | 141  | 131  |
| 109979 | Art3   | ADP-ribosyltransferase 3                                        | 25   | 24   | 28   |
| 11875  | Art5   | ADP-ribosyltransferase 5                                        | 22   | 21   | 22   |
| 68865  | Arv1   | ARV1 homolog (yeast)                                            | 41   | 38   | 41   |
| 11878  | Arx    | aristaless related homeobox                                     | 1263 | 1248 | 1215 |
| 57344  | As3mt  | arsenic (+3 oxidation state) methyltransferase                  | 91   | 94   | 91   |
| 11886  | Asah1  | N-acylsphingosine amidohydrolase 1                              | 234  | 221  | 221  |
| 54447  | Asah2  | N-acylsphingosine amidohydrolase 2                              | 429  | 434  | 440  |
| 69299  | Asb9   | ankyrin repeat and SOCS box-containing 9                        | 682  | 672  | 655  |
| 69090  | Ascc1  | activating signal cointegrator 1 complex subunit 1              | 209  | 197  | 199  |
| 75452  | Ascc2  | activating signal cointegrator 1 complex subunit 2              | 100  | 96   | 98   |
| 77987  | Ascc3  | activating signal cointegrator 1 complex subunit 3              | 1385 | 1399 | 1413 |
| 17172  | Ascl1  | achaete-scute complex homolog 1 (Drosophila)                    | 589  | 593  | 590  |
| 17173  | Ascl2  | achaete-scute complex homolog 2 (Drosophila)                    | 136  | 135  | 132  |
| 56787  | Ascl3  | achaete-scute complex homolog 3 (Drosophila)                    | 38   | 40   | 35   |
| 66403  | Asf1a  | ASF1 anti-silencing function 1 homolog A (S. cerevisiae)        | 142  | 143  | 143  |
| 66929  | Asf1b  | ASF1 anti-silencing function 1 homolog B (S. cerevisiae)        | 93   | 87   | 94   |
| 11890  | Asgr2  | asialoglycoprotein receptor 2                                   | 107  | 96   | 97   |
| 192195 | Ash1l  | ash1 (absent, small, or homeotic)-like (Drosophila)             | 184  | 176  | 172  |
| 23808  | Ash2l  | ash2 (absent, small, or homeotic)-like (Drosophila)             | 65   | 65   | 58   |
| 109900 | Asl    | argininosuccinate lyase                                         | 28   | 38   | 36   |
| 56495  | Asna1  | arsA arsenite transporter, ATP-binding, homolog 1 (bacterial)   | 18   | 15   | 15   |
| 27053  | Asns   | asparagine synthetase                                           | 381  | 369  | 364  |
| 70396  | Asnsd1 | asparagine synthetase domain containing 1                       | 499  | 495  | 475  |
| 11484  | Aspa   | aspartoacylase                                                  | 80   | 81   | 75   |
| 68352  | Aspdh  | aspartate dehydrogenase domain containing                       | 27   | 27   | 29   |
| 104816 | Aspg   | asparaginase homolog (S. cerevisiae)                            | 163  | 168  | 172  |

|           |         |                                                                  |      |      |      |
|-----------|---------|------------------------------------------------------------------|------|------|------|
| 65973     | Asph    | aspartate-beta-hydroxylase                                       | 694  | 687  | 670  |
| 233879    | Asphd1  | aspartate beta-hydroxylase domain containing 1                   | 29   | 24   | 24   |
| 72898     | Asphd2  | aspartate beta-hydroxylase domain containing 2                   | 118  | 112  | 114  |
| 67855     | Asprv1  | aspartic peptidase, retroviral-like 1                            | 175  | 181  | 189  |
| 66514     | Asrgl1  | asparaginase like 1                                              | 1034 | 1042 | 1048 |
| 11898     | Ass1    | argininosuccinate synthetase 1                                   | 405  | 413  | 421  |
| 215095    | Astl    | astacin-like metalloendopeptidase (M12 family)                   | 36   | 36   | 40   |
| 228790    | Asxl1   | additional sex combs like 1 (Drosophila)                         | 204  | 197  | 197  |
| 211961    | Asxl3   | additional sex combs like 3 (Drosophila)                         | 1080 | 1099 | 1086 |
| 74068     | Asz1    | ankyrin repeat, SAM and basic leucine zipper domain containing 1 | 178  | 177  | 174  |
| 70472     | Atad2   | ATPase family, AAA domain containing 2                           | 83   | 81   | 82   |
| 11907     | Ate1    | arginyltransferase 1                                             | 363  | 376  | 367  |
| 11908     | Atf1    | activating transcription factor 1                                | 168  | 167  | 170  |
| 11909     | Atf2    | activating transcription factor 2                                | 174  | 177  | 168  |
| 11910     | Atf3    | activating transcription factor 3                                | 191  | 189  | 195  |
| 11911     | Atf4    | activating transcription factor 4                                | 37   | 36   | 40   |
| 107503    | Atf5    | activating transcription factor 5                                | 110  | 115  | 116  |
| 12915     | Atf6b   | activating transcription factor 6 beta                           | 34   | 25   | 26   |
| 223922    | Atf7    | activating transcription factor 7                                | 185  | 184  | 186  |
| 54343     | Atf7ip  | activating transcription factor 7 interacting protein            | 308  | 319  | 300  |
| 75329     | Atf7ip2 | activating transcription factor 7 interacting protein 2          | 188  | 188  | 179  |
| 66795     | Atg10   | autophagy-related 10 (yeast)                                     | 698  | 709  | 687  |
| 67526     | Atg12   | autophagy-related 12 (yeast)                                     | 19   | 18   | 17   |
| 51897     | Atg13   | ATG13 autophagy related 13 homolog (S. cerevisiae)               | 80   | 79   | 76   |
| 100504663 | Atg14   | VATG14 autophagy related 14 homolog (S. cerevisiae)              | 249  | 251  | 245  |
| 77040     | Atg16l1 | autophagy-related 16-like 1 (yeast)                              | 221  | 219  | 213  |
| 73683     | Atg16l2 | autophagy related 16 like 2 (S. cerevisiae)                      | 263  | 282  | 284  |
| 67841     | Atg3    | autophagy-related 3 (yeast)                                      | 82   | 81   | 80   |
| 666468    | Atg4a   | autophagy-related 4A (yeast)                                     | 393  | 376  | 385  |
| 66615     | Atg4b   | autophagy-related 4B (yeast)                                     | 59   | 56   | 58   |
| 242557    | Atg4c   | autophagy-related 4C (yeast)                                     | 699  | 713  | 686  |
| 235040    | Atg4d   | autophagy-related 4D (yeast)                                     | 54   | 50   | 48   |
| 11793     | Atg5    | autophagy-related 5 (yeast)                                      | 186  | 186  | 188  |
| 74244     | Atg7    | autophagy-related 7 (yeast)                                      | 651  | 648  | 640  |
| 245860    | Atg9a   | autophagy-related 9A (yeast)                                     | 15   | 16   | 15   |
| 213948    | Atg9b   | ATG9 autophagy related 9 homolog B (S. cerevisiae)               | 36   | 34   | 34   |
| 212974    | Ath1    | ATH1, acid trehalase-like 1 (yeast)                              | 41   | 39   | 37   |
| 108147    | Atic    | 5-aminoimidazole-4-carboxamide ribonucleotide formyltransferase/ | 306  | 304  | 313  |
| 73991     | Atl1    | atlastin GTPase 1                                                | 127  | 130  | 131  |
| 11920     | Atm     | ataxia telangiectasia mutated homolog (human)                    | 159  | 176  | 170  |
| 13498     | Atn1    | atrophin 1                                                       | 32   | 31   | 29   |
| 11921     | Atoh1   | atonal homolog 1 (Drosophila)                                    | 2241 | 2268 | 2246 |
| 53404     | Atoh7   | atonal homolog 7 (Drosophila)                                    | 185  | 184  | 177  |
| 71093     | Atoh8   | atonal homolog 8 (Drosophila)                                    | 252  | 263  | 264  |
| 231287    | Atp10d  | ATPase, class V, type 10D                                        | 432  | 436  | 437  |
| 192113    | Atp12a  | ATPase, H+/K+ transporting, nongastric, alpha polypeptide        | 176  | 172  | 179  |
| 268878    | Atp13a5 | ATPase type 13A5                                                 | 435  | 430  | 418  |
| 11928     | Atp1a1  | ATPase, Na+/K+ transporting, alpha 1 polypeptide                 | 590  | 609  | 588  |
| 98660     | Atp1a2  | ATPase, Na+/K+ transporting, alpha 2 polypeptide                 | 66   | 73   | 65   |
| 232975    | Atp1a3  | ATPase, Na+/K+ transporting, alpha 3 polypeptide                 | 131  | 121  | 121  |
| 27222     | Atp1a4  | ATPase, Na+/K+ transporting, alpha 4 polypeptide                 | 103  | 103  | 100  |
| 11931     | Atp1b1  | ATPase, Na+/K+ transporting, beta 1 polypeptide                  | 619  | 641  | 605  |
| 11932     | Atp1b2  | ATPase, Na+/K+ transporting, beta 2 polypeptide                  | 52   | 47   | 46   |
| 11933     | Atp1b3  | ATPase, Na+/K+ transporting, beta 3 polypeptide                  | 292  | 287  | 285  |
| 67821     | Atp1b4  | ATPase, (Na+)/K+ transporting, beta 4 polypeptide                | 251  | 240  | 237  |

|        |          |                                                                               |     |     |     |
|--------|----------|-------------------------------------------------------------------------------|-----|-----|-----|
| 11937  | Atp2a1   | ATPase, Ca <sup>++</sup> transporting, cardiac muscle, fast twitch 1          | 59  | 60  | 57  |
| 11938  | Atp2a2   | ATPase, Ca <sup>++</sup> transporting, cardiac muscle, slow twitch 2          | 243 | 248 | 245 |
| 53313  | Atp2a3   | ATPase, Ca <sup>++</sup> transporting, ubiquitous                             | 266 | 258 | 257 |
| 11941  | Atp2b2   | ATPase, Ca <sup>++</sup> transporting, plasma membrane 2                      | 678 | 692 | 696 |
| 235574 | Atp2c1   | ATPase, Ca <sup>++</sup> -sequestering                                        | 322 | 303 | 311 |
| 69047  | Atp2c2   | ATPase, Ca <sup>++</sup> transporting, type 2C, member 2                      | 137 | 141 | 148 |
| 11944  | Atp4a    | ATPase, H <sup>+</sup> /K <sup>+</sup> exchanging, gastric, alpha polypeptide | 39  | 33  | 40  |
| 11945  | Atp4b    | ATPase, H <sup>+</sup> /K <sup>+</sup> exchanging, beta polypeptide           | 92  | 81  | 83  |
| 11946  | Atp5a1   | ATP synthase, H <sup>+</sup> transporting, mitochondrial F1 complex, alpha s  | 36  | 35  | 37  |
| 11947  | Atp5b    | ATP synthase, H <sup>+</sup> transporting mitochondrial F1 complex, beta sut  | 36  | 33  | 32  |
| 11949  | Atp5c1   | ATP synthase, H <sup>+</sup> transporting, mitochondrial F1 complex, gamma    | 42  | 45  | 38  |
| 66043  | Atp5d    | ATP synthase, H <sup>+</sup> transporting, mitochondrial F1 complex, delta su | 11  | 10  | 9   |
| 67126  | Atp5e    | ATP synthase, H <sup>+</sup> transporting, mitochondrial F1 complex, epsilon  | 32  | 28  | 26  |
| 11950  | Atp5f1   | ATP synthase, H <sup>+</sup> transporting, mitochondrial F0 complex, subunit  | 18  | 16  | 20  |
| 11951  | Atp5g1   | ATP synthase, H <sup>+</sup> transporting, mitochondrial F0 complex, subunit  | 59  | 65  | 63  |
| 228033 | Atp5g3   | ATP synthase, H <sup>+</sup> transporting, mitochondrial F0 complex, subunit  | 890 | 892 | 911 |
| 71679  | Atp5h    | ATP synthase, H <sup>+</sup> transporting, mitochondrial F0 complex, subunit  | 21  | 19  | 23  |
| 11957  | Atp5j    | ATP synthase, H <sup>+</sup> transporting, mitochondrial F0 complex, subunit  | 433 | 440 | 425 |
| 57423  | Atp5j2   | ATP synthase, H <sup>+</sup> transporting, mitochondrial F0 complex, subunit  | 45  | 42  | 42  |
| 11958  | Atp5k    | ATP synthase, H <sup>+</sup> transporting, mitochondrial F1F0 complex, subu   | 75  | 73  | 81  |
| 27425  | Atp5l    | ATP synthase, H <sup>+</sup> transporting, mitochondrial F0 complex, subunit  | 119 | 113 | 110 |
| 28080  | Atp5o    | ATP synthase, H <sup>+</sup> transporting, mitochondrial F1 complex, O subu   | 420 | 422 | 420 |
| 68055  | Atp5s    | ATP synthase, H <sup>+</sup> transporting, mitochondrial F0 complex, subunit  | 54  | 52  | 49  |
| 70495  | Atp6ap2  | ATPase, H <sup>+</sup> transporting, lysosomal accessory protein 2            | 616 | 625 | 612 |
| 140494 | Atp6v0a4 | ATPase, H <sup>+</sup> transporting, lysosomal V0 subunit A4                  | 192 | 186 | 186 |
| 114143 | Atp6v0b  | ATPase, H <sup>+</sup> transporting, lysosomal V0 subunit B                   | 11  | 9   | 9   |
| 11984  | Atp6v0c  | ATPase, H <sup>+</sup> transporting, lysosomal V0 subunit C                   | 41  | 39  | 38  |
| 11972  | Atp6v0d1 | ATPase, H <sup>+</sup> transporting, lysosomal V0 subunit D1                  | 63  | 61  | 66  |
| 11964  | Atp6v1a  | ATPase, H <sup>+</sup> transporting, lysosomal V1 subunit A                   | 147 | 153 | 143 |
| 11966  | Atp6v1b2 | ATPase, H <sup>+</sup> transporting, lysosomal V1 subunit B2                  | 261 | 276 | 264 |
| 66335  | Atp6v1c1 | ATPase, H <sup>+</sup> transporting, lysosomal V1 subunit C1                  | 371 | 365 | 382 |
| 68775  | Atp6v1c2 | ATPase, H <sup>+</sup> transporting, lysosomal V1 subunit C2                  | 113 | 101 | 103 |
| 66290  | Atp6v1g1 | ATPase, H <sup>+</sup> transporting, lysosomal V1 subunit G1                  | 84  | 81  | 81  |
| 66237  | Atp6v1g2 | ATPase, H <sup>+</sup> transporting, lysosomal V1 subunit G2                  | 7   | 9   | 8   |
| 338375 | Atp6v1g3 | ATPase, H <sup>+</sup> transporting, lysosomal V1 subunit G3                  | 556 | 569 | 550 |
| 11977  | Atp7a    | ATPase, Cu <sup>++</sup> transporting, alpha polypeptide                      | 163 | 159 | 157 |
| 11979  | Atp7b    | ATPase, Cu <sup>++</sup> transporting, beta polypeptide                       | 121 | 120 | 111 |
| 54670  | Atp8b1   | ATPase, class I, type 8B, member 1                                            | 480 | 481 | 463 |
| 67331  | Atp8b3   | ATPase, class I, type 8B, member 3                                            | 84  | 76  | 82  |
| 11983  | Atpif1   | ATPase inhibitory factor 1                                                    | 30  | 36  | 30  |
| 245000 | Atr      | ataxia telangiectasia and Rad3 related                                        | 18  | 17  | 16  |
| 235610 | Atrip    | ATR interacting protein                                                       | 32  | 28  | 28  |
| 22589  | Atrx     | alpha thalassemia/mental retardation syndrome X-linked homolog                | 292 | 297 | 293 |
| 20238  | Atxn1    | ataxin 1                                                                      | 966 | 985 | 979 |
| 110616 | Atxn3    | ataxin 3                                                                      | 82  | 84  | 82  |
| 246103 | Atxn7    | ataxin 7                                                                      | 201 | 211 | 205 |
| 217218 | Atxn7l3  | ataxin 7-like 3                                                               | 35  | 32  | 37  |
| 11992  | Auh      | AU RNA binding protein/enoyl-coenzyme A hydratase                             | 293 | 289 | 289 |
| 20878  | Aurka    | aurora kinase A                                                               | 32  | 33  | 34  |
| 66077  | Aurkaip1 | aurora kinase A interacting protein 1                                         | 39  | 33  | 36  |
| 20877  | Aurkb    | aurora kinase B                                                               | 60  | 55  | 56  |
| 20871  | Aurkc    | aurora kinase C                                                               | 185 | 193 | 187 |
| 11998  | Avp      | arginine vasopressin                                                          | 66  | 67  | 68  |
| 69534  | Avpi1    | arginine vasopressin-induced 1                                                | 75  | 73  | 71  |
| 12000  | Avpr2    | arginine vasopressin receptor 2                                               | 45  | 32  | 37  |

|        |               |                                                                        |      |      |      |
|--------|---------------|------------------------------------------------------------------------|------|------|------|
| 330361 | AW146020      | expressed sequence AW146020                                            | 88   | 85   | 94   |
| 245533 | Awat1         | acyl-CoA wax alcohol acyltransferase 1                                 | 86   | 89   | 83   |
| 245532 | Awat2         | acyl-CoA wax alcohol acyltransferase 2                                 | 62   | 65   | 64   |
| 12005  | Axin1         | axin 1                                                                 | 101  | 101  | 105  |
| 12006  | Axin2         | axin2                                                                  | 604  | 567  | 586  |
| 26362  | Axl           | AXL receptor tyrosine kinase                                           | 77   | 73   | 80   |
| 503692 | Aym1          | activator of yeast meiotic promoters 1                                 | 195  | 188  | 188  |
| 54375  | Azin1         | antizyme inhibitor 1                                                   | 476  | 469  | 461  |
| 65964  | B230120H23Rik | RIKEN cDNA B230120H23 gene                                             | 568  | 550  | 540  |
| 12010  | B2m           | beta-2 microglobulin                                                   | 54   | 57   | 49   |
| 26879  | B3galnt1      | UDP-GalNAc:betaGlcNAc beta 1,3-galactosaminyltransferase, poly         | 513  | 526  | 533  |
| 97884  | B3galnt2      | UDP-GalNAc:betaGlcNAc beta 1,3-galactosaminyltransferase, poly         | 332  | 326  | 339  |
| 26877  | B3galt1       | UDP-Gal:betaGlcNAc beta 1,3-galactosyltransferase, polypeptide 1       | 1319 | 1313 | 1300 |
| 26878  | B3galt2       | UDP-Gal:betaGlcNAc beta 1,3-galactosyltransferase, polypeptide 2       | 4267 | 4285 | 4209 |
| 54218  | B3galt4       | UDP-Gal:betaGlcNAc beta 1,3-galactosyltransferase, polypeptide 4       | 19   | 20   | 16   |
| 93961  | B3galt5       | UDP-Gal:betaGlcNAc beta 1,3-galactosyltransferase, polypeptide 5       | 267  | 262  | 266  |
| 117592 | B3galt6       | UDP-Gal:betaGal beta 1,3-galactosyltransferase, polypeptide 6          | 44   | 44   | 38   |
| 381694 | B3galtl       | beta 1,3-galactosyltransferase-like                                    | 504  | 502  | 497  |
| 76898  | B3gat1        | beta-1,3-glucuronyltransferase 1 (glucuronosyltransferase P)           | 1702 | 1721 | 1673 |
| 280645 | B3gat2        | beta-1,3-glucuronyltransferase 2 (glucuronosyltransferase S)           | 677  | 685  | 666  |
| 108902 | B3gnt1        | UDP-GlcNAc:betaGal beta-1,3-N-acetylglucosaminyltransferase 1          | 23   | 20   | 22   |
| 53625  | B3gnt2        | UDP-GlcNAc:betaGal beta-1,3-N-acetylglucosaminyltransferase 2          | 600  | 598  | 594  |
| 72297  | B3gnt3        | UDP-GlcNAc:betaGal beta-1,3-N-acetylglucosaminyltransferase 3          | 46   | 42   | 44   |
| 231727 | B3gnt4        | UDP-GlcNAc:betaGal beta-1,3-N-acetylglucosaminyltransferase 4          | 41   | 43   | 42   |
| 108105 | B3gnt5        | UDP-GlcNAc:betaGal beta-1,3-N-acetylglucosaminyltransferase 5          | 223  | 219  | 237  |
| 272411 | B3gnt6        | UDP-GlcNAc:betaGal beta-1,3-N-acetylglucosaminyltransferase 6          | 171  | 171  | 165  |
| 227327 | B3gnt7        | UDP-GlcNAc:betaGal beta-1,3-N-acetylglucosaminyltransferase 7          | 260  | 251  | 264  |
| 232984 | B3gnt8        | UDP-GlcNAc:betaGal beta-1,3-N-acetylglucosaminyltransferase 8          | 42   | 50   | 45   |
| 14421  | B4galnt1      | beta-1,4-N-acetyl-galactosaminyl transferase 1                         | 70   | 71   | 76   |
| 14422  | B4galnt2      | beta-1,4-N-acetyl-galactosaminyl transferase 2                         | 215  | 216  | 212  |
| 330406 | B4galnt3      | beta-1,4-N-acetyl-galactosaminyl transferase 3                         | 343  | 346  | 335  |
| 330671 | B4galnt4      | beta-1,4-N-acetyl-galactosaminyl transferase 4                         | 81   | 73   | 83   |
| 14595  | B4galt1       | UDP-Gal:betaGlcNAc beta 1,4- galactosyltransferase, polypeptide 1      | 201  | 207  | 213  |
| 53418  | B4galt2       | UDP-Gal:betaGlcNAc beta 1,4- galactosyltransferase, polypeptide 2      | 16   | 15   | 14   |
| 57370  | B4galt3       | UDP-Gal:betaGlcNAc beta 1,4-galactosyltransferase, polypeptide 3       | 41   | 36   | 38   |
| 56375  | B4galt4       | UDP-Gal:betaGlcNAc beta 1,4-galactosyltransferase, polypeptide 4       | 108  | 106  | 111  |
| 56336  | B4galt5       | UDP-Gal:betaGlcNAc beta 1,4-galactosyltransferase, polypeptide 5       | 238  | 229  | 236  |
| 56386  | B4galt6       | UDP-Gal:betaGlcNAc beta 1,4-galactosyltransferase, polypeptide 6       | 285  | 289  | 301  |
| 218271 | B4galt7       | xylosylprotein beta1,4-galactosyltransferase, polypeptide 7 (galact    | 36   | 35   | 39   |
| 12012  | Baat          | bile acid-Coenzyme A: amino acid N-acyltransferase                     | 89   | 95   | 88   |
| 23821  | Bace1         | beta-site APP cleaving enzyme 1                                        | 103  | 105  | 101  |
| 56175  | Bace2         | beta-site APP-cleaving enzyme 2                                        | 387  | 364  | 374  |
| 12013  | Bach1         | BTB and CNC homology 1                                                 | 940  | 967  | 939  |
| 12014  | Bach2         | BTB and CNC homology 2                                                 | 785  | 790  | 780  |
| 12017  | Bag1          | BCL2-associated athanogene 1                                           | 36   | 36   | 37   |
| 213539 | Bag2          | BCL2-associated athanogene 2                                           | 114  | 123  | 115  |
| 67384  | Bag4          | BCL2-associated athanogene 4                                           | 40   | 39   | 41   |
| 70369  | Bag5          | BCL2-associated athanogene 5                                           | 43   | 43   | 42   |
| 224727 | Bag6          | BCL2-associated athanogene 6                                           | 37   | 39   | 41   |
| 228536 | Bahd1         | bromo adjacent homology domain containing 1                            | 77   | 75   | 79   |
| 12018  | Bak1          | BCL2-antagonist/killer 1                                               | 71   | 75   | 66   |
| 68010  | Bambi         | BMP and activin membrane-bound inhibitor, homolog ( <i>Xenopus lae</i> | 1031 | 996  | 986  |
| 23825  | Banf1         | barrier to autointegration factor 1                                    | 25   | 18   | 20   |
| 53325  | Banp          | BTG3 associated nuclear protein                                        | 436  | 451  | 424  |
| 104416 | Bap1          | Brca1 associated protein 1                                             | 92   | 93   | 96   |

|           |          |                                                               |      |      |      |
|-----------|----------|---------------------------------------------------------------|------|------|------|
| 12021     | Bard1    | BRCA1 associated RING domain 1                                | 893  | 888  | 874  |
| 54422     | Barhl1   | BarH-like 1 (Drosophila)                                      | 282  | 264  | 265  |
| 104382    | Barhl2   | BarH-like 2 (Drosophila)                                      | 1046 | 1063 | 1035 |
| 12022     | Barx1    | BarH-like homeobox 1                                          | 295  | 308  | 318  |
| 12023     | Barx2    | BarH-like homeobox 2                                          | 829  | 837  | 815  |
| 70350     | Basp1    | brain abundant, membrane attached signal protein 1            | 3004 | 3011 | 2958 |
| 53314     | Batf     | basic leucine zipper transcription factor, ATF-like           | 187  | 188  | 188  |
| 381319    | Batf3    | basic leucine zipper transcription factor, ATF-like 3         | 136  | 125  | 132  |
| 12028     | Bax      | BCL2-associated X protein                                     | 34   | 32   | 34   |
| 217578    | Baz1a    | bromodomain adjacent to zinc finger domain 1A                 | 275  | 272  | 289  |
| 22385     | Baz1b    | bromodomain adjacent to zinc finger domain, 1B                | 107  | 111  | 104  |
| 116848    | Baz2a    | bromodomain adjacent to zinc finger domain, 2A                | 117  | 121  | 120  |
| 170442    | Bbox1    | butyrobetaine (gamma), 2-oxoglutarate dioxygenase 1 (gamma-bu | 439  | 467  | 437  |
| 52028     | Bbs1     | Bardet-Biedl syndrome 1 (human)                               | 67   | 66   | 64   |
| 71769     | Bbs10    | Bardet-Biedl syndrome 10 (human)                              | 400  | 394  | 401  |
| 241950    | Bbs12    | Bardet-Biedl syndrome 12 (human)                              | 46   | 47   | 48   |
| 70508     | Bbx      | bobby sox homolog (Drosophila)                                | 940  | 935  | 932  |
| 226499    | BC003331 | cDNA sequence BC003331                                        | 89   | 94   | 85   |
| 225994    | BC016495 | cDNA sequence BC016495                                        | 49   | 54   | 50   |
| 234878    | BC021891 | cDNA sequence BC021891                                        | 123  | 127  | 120  |
| 226527    | BC026585 | cDNA sequence BC026585                                        | 125  | 116  | 125  |
| 230234    | BC026590 | cDNA sequence BC026590                                        | 72   | 71   | 81   |
| 381101    | BC048355 | cDNA sequence BC048355                                        | 82   | 79   | 78   |
| 218275    | BC051665 | cDNA sequence BC051665                                        | 266  | 253  | 259  |
| 216454    | BC089597 | cDNA sequence BC089597                                        | 47   | 51   | 48   |
| 100568459 | Bc1      | brain cytoplasmic RNA 1                                       | 233  | 239  | 244  |
| 12031     | Bc1      | brain cytoplasmic RNA 1                                       | 3941 | 239  | 244  |
| 68183     | Bcas2    | breast carcinoma amplified sequence 2                         | 201  | 198  | 203  |
| 12035     | Bcat1    | branched chain aminotransferase 1, cytosolic                  | 1218 | 1212 | 1220 |
| 12036     | Bcat2    | branched chain aminotransferase 2, mitochondrial              | 76   | 72   | 73   |
| 66165     | Bccip    | BRCA2 and CDKN1A interacting protein                          | 87   | 88   | 85   |
| 75284     | Bcdin3d  | BCDIN3 domain containing                                      | 86   | 92   | 90   |
| 12038     | Bche     | butyrylcholinesterase                                         | 2598 | 2657 | 2566 |
| 12039     | Bckdha   | branched chain ketoacid dehydrogenase E1, alpha polypeptide   | 43   | 43   | 42   |
| 12040     | Bckdhb   | branched chain ketoacid dehydrogenase E1, beta polypeptide    | 1898 | 1893 | 1899 |
| 12041     | Bckdk    | branched chain ketoacid dehydrogenase kinase                  | 21   | 24   | 22   |
| 12042     | Bcl10    | B-cell leukemia/lymphoma 10                                   | 228  | 223  | 217  |
| 14025     | Bcl11a   | B-cell CLL/lymphoma 11A (zinc finger protein)                 | 1086 | 1078 | 1088 |
| 58208     | Bcl11b   | B-cell leukemia/lymphoma 11B                                  | 1835 | 1851 | 1871 |
| 12043     | Bcl2     | B-cell leukemia/lymphoma 2                                    | 764  | 768  | 753  |
| 12051     | Bcl3     | B-cell leukemia/lymphoma 3                                    | 86   | 74   | 79   |
| 12053     | Bcl6     | B-cell leukemia/lymphoma 6                                    | 585  | 604  | 585  |
| 12029     | Bcl6b    | B-cell CLL/lymphoma 6, member B                               | 19   | 15   | 16   |
| 80288     | Bcl9l    | B-cell CLL/lymphoma 9-like                                    | 76   | 74   | 83   |
| 72567     | Bclaf1   | BCL2-associated transcription factor 1                        | 155  | 155  | 150  |
| 63857     | Bcmo1    | beta-carotene 15,15'-monooxygenase                            | 110  | 95   | 100  |
| 170752    | Bco2     | beta-carotene oxygenase 2                                     | 44   | 42   | 41   |
| 71458     | Bcor     | BCL6 interacting corepressor                                  | 1640 | 1574 | 1582 |
| 320376    | Bcorl1   | BCL6 co-repressor-like 1                                      | 247  | 250  | 251  |
| 110279    | Bcr      | breakpoint cluster region                                     | 212  | 226  | 221  |
| 71911     | Bdh1     | 3-hydroxybutyrate dehydrogenase, type 1                       | 471  | 453  | 452  |
| 69772     | Bdh2     | 3-hydroxybutyrate dehydrogenase, type 2                       | 121  | 125  | 116  |
| 12061     | Bdkrb1   | bradykinin receptor, beta 1                                   | 167  | 164  | 162  |
| 12062     | Bdkrb2   | bradykinin receptor, beta 2                                   | 186  | 194  | 194  |
| 12064     | Bdnf     | brain derived neurotrophic factor                             | 822  | 797  | 801  |

|        |         |                                                                      |      |      |      |
|--------|---------|----------------------------------------------------------------------|------|------|------|
| 544971 | Bdp1    | B double prime 1, subunit of RNA polymerase III transcription initia | 120  | 121  | 121  |
| 56208  | Becn1   | beclin 1, autophagy related                                          | 44   | 49   | 49   |
| 12097  | Bglap2  | bone gamma-carboxyglutamate protein 2                                | 18   | 21   | 19   |
| 12111  | Bgn     | biglycan                                                             | 57   | 47   | 54   |
| 17341  | Bhlha15 | basic helix-loop-helix family, member a15                            | 158  | 157  | 157  |
| 320522 | Bhlha9  | basic helix-loop-helix family, member a9                             | 143  | 129  | 127  |
| 59058  | Bhlhe22 | basic helix-loop-helix family, member e22                            | 369  | 378  | 357  |
| 140489 | Bhlhe23 | basic helix-loop-helix family, member e23                            | 222  | 212  | 218  |
| 20893  | Bhlhe40 | basic helix-loop-helix family, member e40                            | 741  | 739  | 739  |
| 79362  | Bhlhe41 | basic helix-loop-helix family, member e41                            | 154  | 154  | 169  |
| 12116  | Bhmt    | betaine-homocysteine methyltransferase                               | 224  | 232  | 233  |
| 64918  | Bhmt2   | betaine-homocysteine methyltransferase 2                             | 50   | 47   | 47   |
| 11797  | Birc2   | baculoviral IAP repeat-containing 2                                  | 142  | 145  | 146  |
| 11796  | Birc3   | baculoviral IAP repeat-containing 3                                  | 222  | 224  | 220  |
| 12211  | Birc6   | baculoviral IAP repeat-containing 6                                  | 284  | 299  | 291  |
| 12143  | Blk     | B lymphoid kinase                                                    | 243  | 247  | 252  |
| 12144  | Blm     | Bloom syndrome, RecQ helicase-like                                   | 366  | 384  | 370  |
| 104184 | Blmh    | bleomycin hydrolase                                                  | 119  | 122  | 118  |
| 73689  | Bloc1s2 | biogenesis of lysosome-related organelles complex-1, subunit 2       | 78   | 71   | 75   |
| 109778 | Blvra   | biliverdin reductase A                                               | 155  | 159  | 162  |
| 233016 | Blvrb   | biliverdin reductase B (flavin reductase (NADPH))                    | 32   | 37   | 35   |
| 12151  | Bmi1    | Bmi1 polycomb ring finger oncogene                                   | 30   | 32   | 29   |
| 12153  | Bmp1    | bone morphogenetic protein 1                                         | 80   | 84   | 83   |
| 12154  | Bmp10   | bone morphogenetic protein 10                                        | 143  | 136  | 137  |
| 12155  | Bmp15   | bone morphogenetic protein 15                                        | 289  | 274  | 279  |
| 12156  | Bmp2    | bone morphogenetic protein 2                                         | 2070 | 2076 | 2047 |
| 140780 | Bmp2k   | BMP2 inducible kinase                                                | 408  | 403  | 393  |
| 110075 | Bmp3    | bone morphogenetic protein 3                                         | 704  | 711  | 719  |
| 12159  | Bmp4    | bone morphogenetic protein 4                                         | 480  | 481  | 491  |
| 12161  | Bmp6    | bone morphogenetic protein 6                                         | 421  | 417  | 425  |
| 12162  | Bmp7    | bone morphogenetic protein 7                                         | 553  | 533  | 522  |
| 12166  | Bmpr1a  | bone morphogenetic protein receptor, type 1A                         | 290  | 273  | 267  |
| 12167  | Bmpr1b  | bone morphogenetic protein receptor, type 1B                         | 1184 | 1178 | 1176 |
| 12168  | Bmpr2   | bone morphogenic protein receptor, type II (serine/threonine kinase) | 283  | 281  | 261  |
| 12169  | Bmx     | BMX non-receptor tyrosine kinase                                     | 154  | 161  | 159  |
| 242509 | Bnc2    | basonuclin 2                                                         | 1719 | 1770 | 1699 |
| 12176  | Bnip3   | BCL2/adenovirus E1B interacting protein 3                            | 124  | 123  | 126  |
| 12177  | Bnip3l  | BCL2/adenovirus E1B interacting protein 3-like                       | 217  | 215  | 206  |
| 75388  | Boll    | bol, boule-like (Drosophila)                                         | 209  | 209  | 199  |
| 12181  | Bop1    | block of proliferation 1                                             | 26   | 30   | 25   |
| 12183  | Bpgm    | 2,3-bisphosphoglycerate mutase                                       | 385  | 386  | 369  |
| 23827  | Bpnt1   | bisphosphate 3'-nucleotidase 1                                       | 47   | 44   | 49   |
| 207165 | Bptf    | bromodomain PHD finger transcription factor                          | 214  | 218  | 219  |
| 109880 | Braf    | Braf transforming gene                                               | 280  | 269  | 275  |
| 72399  | Brap    | BRCA1 associated protein                                             | 67   | 68   | 64   |
| 12189  | Brca1   | breast cancer 1                                                      | 120  | 112  | 119  |
| 12190  | Brca2   | breast cancer 2                                                      | 97   | 102  | 93   |
| 210766 | Brcc3   | BRCA1/BRCA2-containing complex, subunit 3                            | 111  | 118  | 111  |
| 223770 | Brd1    | bromodomain containing 1                                             | 199  | 204  | 198  |
| 57261  | Brd4    | bromodomain containing 4                                             | 178  | 176  | 180  |
| 26992  | Brd7    | bromodomain containing 7                                             | 297  | 297  | 291  |
| 78656  | Brd8    | bromodomain containing 8                                             | 1    | #N/A | 1    |
| 114642 | Brdt    | bromodomain, testis-specific                                         | 142  | 148  | 141  |
| 107976 | Bre     | brain and reproductive organ-expressed protein                       | 550  | 569  | 557  |
| 72308  | Brf1    | BRF1 homolog, subunit of RNA polymerase III transcription initiatic  | 48   | 48   | 44   |

|        |               |                                                                      |      |      |      |
|--------|---------------|----------------------------------------------------------------------|------|------|------|
| 66653  | Brf2          | BRF2, subunit of RNA polymerase III transcription initiation factor, | 102  | 113  | 103  |
| 237911 | Brip1         | BRCA1 interacting protein C-terminal helicase 1                      | 465  | 467  | 462  |
| 67832  | Brix1         | BRX1, biogenesis of ribosomes, homolog (S. cerevisiae)               | 20   | 21   | 20   |
| 107392 | Brms1         | breast cancer metastasis-suppressor 1                                | 13   | 14   | 12   |
| 52592  | Brms1l        | breast cancer metastasis-suppressor 1-like                           | 678  | 684  | 663  |
| 78783  | Brpf1         | bromodomain and PHD finger containing, 1                             | 54   | 57   | 56   |
| 268936 | Brpf3         | bromodomain and PHD finger containing, 3                             | 122  | 106  | 119  |
| 381979 | Brsk1         | BR serine/threonine kinase 1                                         | 54   | 46   | 53   |
| 75770  | Brsk2         | BR serine/threonine kinase 2                                         | 200  | 191  | 195  |
| 93871  | Brwd1         | bromodomain and WD repeat domain containing 1                        | 177  | 175  | 174  |
| 12182  | Bst1          | bone marrow stromal cell antigen 1                                   | 114  | 114  | 101  |
| 244813 | Bsx           | brain specific homeobox                                              | 207  | 209  | 204  |
| 26363  | Btd           | biotinidase                                                          | 243  | 238  | 251  |
| 218490 | Btf3          | basic transcription factor 3                                         | 120  | 119  | 117  |
| 12226  | Btg1          | B-cell translocation gene 1, anti-proliferative                      | 1940 | 2010 | 1960 |
| 12227  | Btg2          | B-cell translocation gene 2, anti-proliferative                      | 94   | 92   | 83   |
| 12229  | Btk           | Bruton agammaglobulinemia tyrosine kinase                            | 54   | 51   | 54   |
| 12231  | Btn1a1        | butyrophilin, subfamily 1, member A1                                 | 70   | 67   | 76   |
| 238555 | Btn2a2        | butyrophilin, subfamily 2, member A2                                 | 85   | 87   | 82   |
| 12234  | Btrc          | beta-transducin repeat containing protein                            | 422  | 430  | 408  |
| 12235  | Bub1          | budding uninhibited by benzimidazoles 1 homolog (S. cerevisiae)      | 79   | 78   | 79   |
| 12236  | Bub1b         | budding uninhibited by benzimidazoles 1 homolog, beta (S. cerevis)   | 151  | 145  | 155  |
| 23828  | Bves          | blood vessel epicardial substance                                    | 231  | 239  | 227  |
| 66882  | Bzw1          | basic leucine zipper and W2 domains 1                                | 193  | 189  | 190  |
| 66912  | Bzw2          | basic leucine zipper and W2 domains 2                                | 85   | 86   | 86   |
| 57316  | C1d           | C1D nuclear receptor co-repressor                                    | 920  | 953  | 934  |
| 94192  | C1galt1       | core 1 synthase, glycoprotein-N-acetylgalactosamine 3-beta-galact    | 641  | 650  | 628  |
| 12259  | C1qa          | complement component 1, q subcomponent, alpha polypeptide            | 88   | 88   | 78   |
| 12260  | C1qb          | complement component 1, q subcomponent, beta polypeptide             | 68   | 73   | 75   |
| 69183  | C1qtnf2       | C1q and tumor necrosis factor related protein 2                      | 132  | 123  | 124  |
| 50909  | C1ra          | complement component 1, r subcomponent A                             | 60   | 63   | 68   |
| 667277 | C1rb          | complement component 1, r subcomponent B                             | 123  | 121  | 125  |
| 232371 | C1rl          | complement component 1, r subcomponent-like                          | 66   | 67   | 66   |
| 50908  | C1s           | complement component 1, s subcomponent                               | 70   | 70   | 74   |
| 12263  | C2            | complement component 2 (within H-2S)                                 | 42   | 48   | 42   |
| 101831 | C230052I12Rik | RIKEN cDNA C230052I12 gene                                           | 87   | 80   | 81   |
| 244895 | C230081A13Rik | RIKEN cDNA C230081A13 gene                                           | 321  | 331  | 334  |
| 277939 | C2cd3         | C2 calcium-dependent domain containing 3                             | 133  | 130  | 120  |
| 12266  | C3            | complement component 3                                               | 67   | 67   | 65   |
| 231855 | C330006K01Rik | RIKEN cDNA C330006K01 gene                                           | 155  | 157  | 162  |
| 77422  | C330018D20Rik | RIKEN cDNA C330018D20 gene                                           | 256  | 255  | 255  |
| 12268  | C4b           | complement component 4B (Childo blood group)                         | 162  | 160  | 158  |
| 12269  | C4bp          | complement component 4 binding protein                               | 72   | 70   | 69   |
| 12274  | C6            | complement component 6                                               | 656  | 673  | 661  |
| 245555 | C77370        | expressed sequence C77370                                            | 345  | 374  | 351  |
| 19777  | C80913        | expressed sequence C80913                                            | 423  | 445  | 428  |
| 230558 | C8a           | complement component 8, alpha polypeptide                            | 190  | 190  | 189  |
| 110382 | C8b           | complement component 8, beta polypeptide                             | 657  | 672  | 649  |
| 69379  | C8g           | complement component 8, gamma polypeptide                            | 7    | 8    | 11   |
| 12279  | C9            | complement component 9                                               | 248  | 246  | 244  |
| 12283  | Cab39         | calcium binding protein 39                                           | 202  | 202  | 209  |
| 12286  | Cacna1a       | calcium channel, voltage-dependent, P/Q type, alpha 1A subunit       | 520  | 520  | 490  |
| 58226  | Cacna1h       | calcium channel, voltage-dependent, T type, alpha 1H subunit         | 122  | 119  | 119  |
| 12298  | Cacnb4        | calcium channel, voltage-dependent, beta 4 subunit                   | 554  | 585  | 567  |
| 12301  | Cacybp        | calyculin binding protein                                            | 198  | 209  | 205  |

|        |          |                                                                 |      |      |      |
|--------|----------|-----------------------------------------------------------------|------|------|------|
| 69719  | Cad      | carbamoyl-phosphate synthetase 2, aspartate transcarbamylase, a | 56   | 63   | 58   |
| 12310  | Calca    | calcitonin/calcitonin-related polypeptide, alpha                | 204  | 201  | 196  |
| 67488  | Calcoco1 | calcium binding and coiled coil domain 1                        | 325  | 326  | 312  |
| 12311  | Calcr    | calcitonin receptor                                             | 316  | 304  | 307  |
| 12317  | Calr     | calreticulin                                                    | 21   | 18   | 20   |
| 73316  | Calr3    | calreticulin 3                                                  | 44   | 40   | 40   |
| 52163  | Camk1    | calcium/calmodulin-dependent protein kinase I                   | 63   | 63   | 64   |
| 227541 | Camk1d   | calcium/calmodulin-dependent protein kinase ID                  | 902  | 914  | 921  |
| 215303 | Camk1g   | calcium/calmodulin-dependent protein kinase I gamma             | 275  | 262  | 277  |
| 12322  | Camk2a   | calcium/calmodulin-dependent protein kinase II alpha            | 177  | 189  | 182  |
| 12323  | Camk2b   | calcium/calmodulin-dependent protein kinase II, beta            | 284  | 274  | 276  |
| 108058 | Camk2d   | calcium/calmodulin-dependent protein kinase II, delta           | 727  | 743  | 741  |
| 12325  | Camk2g   | calcium/calmodulin-dependent protein kinase II gamma            | 124  | 126  | 133  |
| 66259  | Camk2n1  | calcium/calmodulin-dependent protein kinase II inhibitor 1      | 242  | 232  | 239  |
| 73047  | Camk2n2  | calcium/calmodulin-dependent protein kinase II inhibitor 2      | 19   | 18   | 19   |
| 12326  | Camk4    | calcium/calmodulin-dependent protein kinase IV                  | 470  | 475  | 458  |
| 55984  | Camkk1   | calcium/calmodulin-dependent protein kinase kinase 1, alpha     | 62   | 54   | 65   |
| 207565 | Camkk2   | calcium/calmodulin-dependent protein kinase kinase 2, beta      | 141  | 152  | 151  |
| 235604 | Camkv    | CaM kinase-like vesicle-associated                              | 29   | 28   | 29   |
| 12328  | Caml     | calcium modulating ligand                                       | 46   | 45   | 45   |
| 12796  | Camp     | cathelicidin antimicrobial peptide                              | 60   | 56   | 55   |
| 100072 | Camta1   | calmodulin binding transcription activator 1                    | 1127 | 1121 | 1099 |
| 216874 | Camta2   | calmodulin binding transcription activator 2                    | 37   | 39   | 38   |
| 71902  | Cand1    | cullin associated and neddylation disassociated 1               | 760  | 753  | 744  |
| 67088  | Cand2    | cullin-associated and neddylation-dissociated 2 (putative)      | 53   | 58   | 60   |
| 76025  | Cant1    | calcium activated nucleotidase 1                                | 35   | 34   | 35   |
| 12330  | Canx     | calnexin                                                        | 81   | 90   | 80   |
| 12333  | Capn1    | calpain 1                                                       | 73   | 75   | 67   |
| 23830  | Capn10   | calpain 10                                                      | 46   | 53   | 49   |
| 268958 | Capn11   | calpain 11                                                      | 115  | 105  | 102  |
| 60594  | Capn12   | calpain 12                                                      | 128  | 126  | 127  |
| 381122 | Capn13   | calpain 13                                                      | 790  | 786  | 770  |
| 12334  | Capn2    | calpain 2                                                       | 183  | 194  | 197  |
| 12335  | Capn3    | calpain 3                                                       | 230  | 226  | 228  |
| 12337  | Capn5    | calpain 5                                                       | 62   | 66   | 64   |
| 12338  | Capn6    | calpain 6                                                       | 287  | 304  | 284  |
| 12339  | Capn7    | calpain 7                                                       | 141  | 145  | 147  |
| 170725 | Capn8    | calpain 8                                                       | 304  | 306  | 300  |
| 73647  | Capn9    | calpain 9                                                       | 118  | 108  | 120  |
| 12336  | Capns1   | calpain, small subunit 1                                        | 64   | 66   | 65   |
| 53872  | Caprin1  | cell cycle associated protein 1                                 | 263  | 257  | 249  |
| 232560 | Caprin2  | caprin family member 2                                          | 157  | 160  | 153  |
| 12346  | Car1     | carbonic anhydrase 1                                            | 328  | 322  | 316  |
| 76459  | Car12    | carbonic anhydrase 12                                           | 267  | 258  | 267  |
| 71934  | Car13    | carbonic anhydrase 13                                           | 217  | 210  | 215  |
| 12349  | Car2     | carbonic anhydrase 2                                            | 583  | 604  | 579  |
| 12350  | Car3     | carbonic anhydrase 3                                            | 100  | 96   | 106  |
| 12351  | Car4     | carbonic anhydrase 4                                            | 294  | 286  | 289  |
| 12352  | Car5a    | carbonic anhydrase 5a, mitochondrial                            | 56   | 57   | 54   |
| 56078  | Car5b    | carbonic anhydrase 5b, mitochondrial                            | 143  | 138  | 141  |
| 12353  | Car6     | carbonic anhydrase 6                                            | 115  | 109  | 113  |
| 12354  | Car7     | carbonic anhydrase 7                                            | 64   | 66   | 73   |
| 12319  | Car8     | carbonic anhydrase 8                                            | 1947 | 1972 | 1920 |
| 230099 | Car9     | carbonic anhydrase 9                                            | 31   | 32   | 32   |
| 108723 | Card11   | caspase recruitment domain family, member 11                    | 530  | 520  | 527  |

|        |          |                                                                       |      |      |      |
|--------|----------|-----------------------------------------------------------------------|------|------|------|
| 170720 | Card14   | caspase recruitment domain family, member 14                          | 76   | 70   | 71   |
| 59035  | Carm1    | coactivator-associated arginine methyltransferase 1                   | 90   | 82   | 90   |
| 107239 | Carns1   | carnosine synthase 1                                                  | 31   | 33   | 34   |
| 27267  | Cars     | cysteinyl-tRNA synthetase                                             | 106  | 104  | 105  |
| 71941  | Cars2    | cysteinyl-tRNA synthetase 2 (mitochondrial)(putative)                 | 78   | 72   | 77   |
| 27220  | Cartpt   | CART prepropeptide                                                    | 629  | 645  | 625  |
| 192160 | Casc3    | cancer susceptibility candidate 3                                     | 14   | 19   | 23   |
| 12361  | Cask     | calcium/calmodulin-dependent serine protein kinase (MAGUK fami        | 641  | 666  | 614  |
| 12362  | Casp1    | caspase 1                                                             | 655  | 642  | 647  |
| 12364  | Casp12   | caspase 12                                                            | 1103 | 1079 | 1057 |
| 12365  | Casp14   | caspase 14                                                            | 178  | 177  | 172  |
| 12366  | Casp2    | caspase 2                                                             | 29   | 29   | 30   |
| 12367  | Casp3    | caspase 3                                                             | 159  | 154  | 155  |
| 12363  | Casp4    | caspase 4, apoptosis-related cysteine peptidase                       | 55   | 64   | 53   |
| 12368  | Casp6    | caspase 6                                                             | 120  | 116  | 118  |
| 12369  | Casp7    | caspase 7                                                             | 86   | 87   | 81   |
| 12370  | Casp8    | caspase 8                                                             | 340  | 363  | 337  |
| 26885  | Casp8ap2 | caspase 8 associated protein 2                                        | 73   | 68   | 70   |
| 12371  | Casp9    | caspase 9                                                             | 44   | 47   | 44   |
| 12380  | Cast     | calpastatin                                                           | 567  | 583  | 566  |
| 69743  | Casz1    | castor homolog 1, zinc finger (Drosophila)                            | 572  | 550  | 558  |
| 12359  | Cat      | catalase                                                              | 184  | 176  | 182  |
| 12389  | Cav1     | caveolin 1, caveolae protein                                          | 225  | 234  | 226  |
| 12391  | Cav3     | caveolin 3                                                            | 131  | 133  | 136  |
| 12396  | Cbfa2t2  | core-binding factor, runt domain, alpha subunit 2, translocated to, 2 | 186  | 185  | 180  |
| 12398  | Cbfa2t3  | core-binding factor, runt domain, alpha subunit 2, translocated to, 3 | 219  | 208  | 213  |
| 12400  | Cbfb     | core binding factor beta                                              | 118  | 120  | 125  |
| 12402  | Cbl      | Casitas B-lineage lymphoma                                            | 143  | 135  | 139  |
| 208650 | Cblb     | Casitas B-lineage lymphoma b                                          | 2179 | 2172 | 2133 |
| 80794  | Cblc     | Casitas B-lineage lymphoma c                                          | 65   | 68   | 65   |
| 104836 | Cbl11    | Casitas B-lineage lymphoma-like 1                                     | 164  | 165  | 157  |
| 12408  | Cbr1     | carbonyl reductase 1                                                  | 96   | 100  | 101  |
| 12409  | Cbr2     | carbonyl reductase 2                                                  | 76   | 78   | 77   |
| 109857 | Cbr3     | carbonyl reductase 3                                                  | 128  | 132  | 129  |
| 234309 | Cbr4     | carbonyl reductase 4                                                  | 879  | 876  | 867  |
| 12411  | Cbs      | cystathionine beta-synthase                                           | 118  | 123  | 115  |
| 12412  | Cbx1     | chromobox homolog 1 (Drosophila HP1 beta)                             | 25   | 23   | 29   |
| 12416  | Cbx2     | chromobox homolog 2 (Drosophila Pc class)                             | 65   | 67   | 64   |
| 12417  | Cbx3     | chromobox homolog 3 (Drosophila HP1 gamma)                            | 76   | 71   | 68   |
| 12418  | Cbx4     | chromobox homolog 4 (Drosophila Pc class)                             | 224  | 227  | 216  |
| 12419  | Cbx5     | chromobox homolog 5 (Drosophila HP1a)                                 | 129  | 134  | 138  |
| 52609  | Cbx7     | chromobox homolog 7                                                   | 159  | 157  | 157  |
| 30951  | Cbx8     | chromobox homolog 8 (Drosophila Pc class)                             | 71   | 67   | 71   |
| 73739  | Cby1     | chibby homolog 1 (Drosophila)                                         | 16   | 14   | 13   |
| 212139 | Cc2d1a   | coiled-coil and C2 domain containing 1A                               | 26   | 25   | 27   |
| 67500  | Ccar1    | cell division cycle and apoptosis regulator 1                         | 204  | 209  | 208  |
| 70266  | Ccbl1    | cysteine conjugate-beta lyase 1                                       | 80   | 78   | 74   |
| 229905 | Ccbl2    | cysteine conjugate-beta lyase 2                                       | 183  | 193  | 195  |
| 75565  | Ccdc101  | coiled-coil domain containing 101                                     | 69   | 70   | 74   |
| 408022 | Ccdc111  | coiled-coil domain containing 111                                     | 87   | 88   | 80   |
| 237859 | Ccdc55   | coiled-coil domain containing 55                                      | 145  | 144  | 140  |
| 52713  | Ccdc59   | coiled-coil domain containing 59                                      | 782  | 804  | 777  |
| 229780 | Ccdc76   | coiled-coil domain containing 76                                      | 88   | 95   | 85   |
| 240514 | Ccdc85b  | coiled-coil domain containing 85B                                     | 15   | 14   | 14   |
| 108686 | Ccdc88a  | coiled coil domain containing 88A                                     | 355  | 343  | 342  |

|        |        |                                                                     |      |      |      |
|--------|--------|---------------------------------------------------------------------|------|------|------|
| 12424  | Cck    | cholecystokinin                                                     | 358  | 341  | 337  |
| 20296  | Ccl2   | chemokine (C-C motif) ligand 2                                      | 104  | 96   | 105  |
| 20304  | Ccl5   | chemokine (C-C motif) ligand 5                                      | 75   | 75   | 74   |
| 12428  | Ccna2  | cyclin A2                                                           | 81   | 80   | 75   |
| 268697 | Ccnb1  | cyclin B1                                                           | 72   | 79   | 76   |
| 51813  | Ccnc   | cyclin C                                                            | 107  | 108  | 103  |
| 12443  | Ccnd1  | cyclin D1                                                           | 368  | 378  | 374  |
| 12444  | Ccnd2  | cyclin D2                                                           | 429  | 429  | 441  |
| 12445  | Ccnd3  | cyclin D3                                                           | 252  | 257  | 261  |
| 12447  | Ccne1  | cyclin E1                                                           | 206  | 213  | 204  |
| 12448  | Ccne2  | cyclin E2                                                           | 122  | 125  | 128  |
| 12449  | Ccnf   | cyclin F                                                            | 172  | 160  | 165  |
| 66671  | Ccnh   | cyclin H                                                            | 1328 | 1370 | 1331 |
| 12454  | Ccnk   | cyclin K                                                            | 113  | 112  | 117  |
| 56706  | Ccnl1  | cyclin L1                                                           | 606  | 597  | 594  |
| 56036  | Ccnl2  | cyclin L2                                                           | 35   | 38   | 37   |
| 218630 | Ccno   | cyclin O                                                            | 81   | 84   | 85   |
| 12455  | Ccnt1  | cyclin T1                                                           | 5    | 4    | 3    |
| 12772  | Ccr2   | chemokine (C-C motif) receptor 2                                    | 124  | 125  | 119  |
| 12774  | Ccr5   | chemokine (C-C motif) receptor 5                                    | 118  | 123  | 129  |
| 12775  | Ccr7   | chemokine (C-C motif) receptor 7                                    | 186  | 186  | 193  |
| 12460  | Ccs    | copper chaperone for superoxide dismutase                           | 35   | 36   | 39   |
| 12461  | Cct2   | chaperonin containing Tcp1, subunit 2 (beta)                        | 131  | 132  | 143  |
| 12462  | Cct3   | chaperonin containing Tcp1, subunit 3 (gamma)                       | 38   | 31   | 40   |
| 12464  | Cct4   | chaperonin containing Tcp1, subunit 4 (delta)                       | 40   | 39   | 42   |
| 12465  | Cct5   | chaperonin containing Tcp1, subunit 5 (epsilon)                     | 45   | 42   | 40   |
| 12466  | Cct6a  | chaperonin containing Tcp1, subunit 6a (zeta)                       | 8    | 9    | 7    |
| 12467  | Cct6b  | chaperonin containing Tcp1, subunit 6b (zeta)                       | 165  | 173  | 173  |
| 12469  | Cct8   | chaperonin containing Tcp1, subunit 8 (theta)                       | 125  | 127  | 123  |
| 12479  | Cd1d1  | CD1d1 antigen                                                       | 245  | 246  | 236  |
| 12480  | Cd1d2  | CD1d2 antigen                                                       | 106  | 100  | 105  |
| 69165  | Cd209b | CD209b antigen                                                      | 82   | 85   | 88   |
| 12484  | Cd24a  | CD24a antigen                                                       | 69   | 67   | 62   |
| 21940  | Cd27   | CD27 antigen                                                        | 42   | 43   | 41   |
| 102657 | Cd276  | CD276 antigen                                                       | 121  | 114  | 117  |
| 12487  | Cd28   | CD28 antigen                                                        | 439  | 452  | 446  |
| 12488  | Cd2ap  | CD2-associated protein                                              | 372  | 353  | 358  |
| 12491  | Cd36   | CD36 antigen                                                        | 533  | 559  | 543  |
| 12494  | Cd38   | CD38 antigen                                                        | 214  | 216  | 213  |
| 12501  | Cd3e   | CD3 antigen, epsilon polypeptide                                    | 80   | 80   | 81   |
| 70333  | Cd3eap | CD3E antigen, epsilon polypeptide associated protein                | 22   | 18   | 22   |
| 12504  | Cd4    | CD4 antigen                                                         | 59   | 64   | 57   |
| 21939  | Cd40   | CD40 antigen                                                        | 74   | 73   | 69   |
| 21947  | Cd40lg | CD40 ligand                                                         | 307  | 314  | 303  |
| 12505  | Cd44   | CD44 antigen                                                        | 479  | 471  | 476  |
| 17221  | Cd46   | CD46 antigen, complement regulatory protein                         | 119  | 119  | 112  |
| 13136  | Cd55   | CD55 antigen                                                        | 263  | 257  | 260  |
| 12509  | Cd59a  | CD59a antigen                                                       | 66   | 70   | 65   |
| 333883 | Cd59b  | CD59b antigen                                                       | 86   | 84   | 94   |
| 12511  | Cd6    | CD6 antigen                                                         | 132  | 129  | 137  |
| 16149  | Cd74   | CD74 antigen (invariant polypeptide of major histocompatibility con | 90   | 95   | 96   |
| 12519  | Cd80   | CD80 antigen                                                        | 89   | 95   | 88   |
| 12520  | Cd81   | CD81 antigen                                                        | 62   | 60   | 56   |
| 72269  | Cda    | cytidine deaminase                                                  | 93   | 87   | 92   |
| 229776 | Cdc14a | CDC14 cell division cycle 14 homolog A (S. cerevisiae)              | 330  | 319  | 319  |

|        |          |                                                                    |      |      |      |
|--------|----------|--------------------------------------------------------------------|------|------|------|
| 218294 | Cdc14b   | CDC14 cell division cycle 14 homolog B ( <i>S. cerevisiae</i> )    | 228  | 239  | 235  |
| 69957  | Cdc16    | CDC16 cell division cycle 16 homolog ( <i>S. cerevisiae</i> )      | 101  | 100  | 101  |
| 107995 | Cdc20    | cell division cycle 20 homolog ( <i>S. cerevisiae</i> )            | 36   | 36   | 29   |
| 52563  | Cdc23    | CDC23 (cell division cycle 23, yeast, homolog)                     | 119  | 119  | 122  |
| 12531  | Cdc25b   | cell division cycle 25 homolog B ( <i>S. pombe</i> )               | 39   | 46   | 38   |
| 12532  | Cdc25c   | cell division cycle 25 homolog C ( <i>S. pombe</i> )               | 47   | 51   | 48   |
| 66440  | Cdc26    | cell division cycle 26                                             | 62   | 64   | 66   |
| 217232 | Cdc27    | cell division cycle 27 homolog ( <i>S. cerevisiae</i> )            | 141  | 148  | 143  |
| 216150 | Cdc34    | cell division cycle 34 homolog ( <i>S. cerevisiae</i> )            | 25   | 24   | 24   |
| 71713  | Cdc40    | cell division cycle 40 homolog (yeast)                             | 261  | 260  | 251  |
| 12540  | Cdc42    | cell division cycle 42 homolog ( <i>S. cerevisiae</i> )            | 161  | 177  | 169  |
| 226751 | Cdc42bpa | CDC42 binding protein kinase alpha                                 | 490  | 493  | 490  |
| 217866 | Cdc42bpb | CDC42 binding protein kinase beta                                  | 180  | 166  | 168  |
| 240505 | Cdc42bpg | CDC42 binding protein kinase gamma (DMPK-like)                     | 62   | 68   | 65   |
| 12544  | Cdc45    | cell division cycle 45 homolog ( <i>S. cerevisiae</i> )            | 45   | 46   | 43   |
| 71702  | Cdc5l    | cell division cycle 5-like ( <i>S. pombe</i> )                     | 849  | 853  | 841  |
| 23834  | Cdc6     | cell division cycle 6 homolog ( <i>S. cerevisiae</i> )             | 100  | 90   | 95   |
| 12545  | Cdc7     | cell division cycle 7 ( <i>S. cerevisiae</i> )                     | 472  | 464  | 466  |
| 214498 | Cdc73    | cell division cycle 73, Paf1/RNA polymerase II complex component   | 125  | 134  | 128  |
| 67849  | Cdca5    | cell division cycle associated 5                                   | 29   | 26   | 30   |
| 66953  | Cdca7    | cell division cycle associated 7                                   | 889  | 913  | 899  |
| 217946 | Cdca7l   | cell division cycle associated 7 like                              | 883  | 889  | 870  |
| 12550  | Cdh1     | cadherin 1                                                         | 225  | 224  | 236  |
| 12554  | Cdh13    | cadherin 13                                                        | 2012 | 2006 | 1962 |
| 52858  | Cdipt    | CDP-diacylglycerol--inositol 3-phosphatidyltransferase (phosphatid | 77   | 71   | 79   |
| 12534  | Cdk1     | cyclin-dependent kinase 1                                          | 407  | 419  | 412  |
| 234854 | Cdk10    | cyclin-dependent kinase 10                                         | 30   | 33   | 31   |
| 12537  | Cdk11b   | cyclin-dependent kinase 11B                                        | 66   | 68   | 66   |
| 69131  | Cdk12    | cyclin-dependent kinase 12                                         | 172  | 172  | 182  |
| 69562  | Cdk13    | cyclin-dependent kinase 13                                         | 252  | 254  | 239  |
| 18647  | Cdk14    | cyclin-dependent kinase 14                                         | 917  | 918  | 908  |
| 271697 | Cdk15    | cyclin-dependent kinase 15                                         | 328  | 339  | 320  |
| 18555  | Cdk16    | cyclin-dependent kinase 16                                         | 51   | 47   | 49   |
| 237459 | Cdk17    | cyclin-dependent kinase 17                                         | 559  | 570  | 574  |
| 18557  | Cdk18    | cyclin-dependent kinase 18                                         | 158  | 162  | 155  |
| 78334  | Cdk19    | cyclin-dependent kinase 19                                         | 340  | 339  | 346  |
| 12566  | Cdk2     | cyclin-dependent kinase 2                                          | 12   | 9    | 7    |
| 105278 | Cdk20    | cyclin-dependent kinase 20                                         | 164  | 157  | 169  |
| 12567  | Cdk4     | cyclin-dependent kinase 4                                          | 12   | 13   | 12   |
| 12568  | Cdk5     | cyclin-dependent kinase 5                                          | 16   | 13   | 14   |
| 12569  | Cdk5r1   | cyclin-dependent kinase 5, regulatory subunit 1 (p35)              | 446  | 449  | 468  |
| 66971  | Cdk5rap1 | CDK5 regulatory subunit associated protein 1                       | 135  | 134  | 122  |
| 214444 | Cdk5rap2 | CDK5 regulatory subunit associated protein 2                       | 2040 | 2039 | 2005 |
| 12571  | Cdk6     | cyclin-dependent kinase 6                                          | 699  | 712  | 680  |
| 12572  | Cdk7     | cyclin-dependent kinase 7                                          | 94   | 100  | 97   |
| 264064 | Cdk8     | cyclin-dependent kinase 8                                          | 214  | 218  | 225  |
| 107951 | Cdk9     | cyclin-dependent kinase 9 (CDC2-related kinase)                    | 21   | 23   | 24   |
| 68916  | Cdkal1   | CDK5 regulatory subunit associated protein 1-like 1                | 1338 | 1334 | 1331 |
| 71091  | Cdkl1    | cyclin-dependent kinase-like 1 (CDC2-related kinase)               | 132  | 136  | 133  |
| 53886  | Cdkl2    | cyclin-dependent kinase-like 2 (CDC2-related kinase)               | 122  | 121  | 119  |
| 213084 | Cdkl3    | cyclin-dependent kinase-like 3                                     | 129  | 123  | 122  |
| 381113 | Cdkl4    | cyclin-dependent kinase-like 4                                     | 325  | 320  | 316  |
| 382253 | Cdkl5    | cyclin-dependent kinase-like 5                                     | 314  | 314  | 292  |
| 12575  | Cdkn1a   | cyclin-dependent kinase inhibitor 1A (P21)                         | 74   | 71   | 71   |
| 12576  | Cdkn1b   | cyclin-dependent kinase inhibitor 1B                               | 40   | 38   | 37   |

|        |        |                                                                  |      |      |      |
|--------|--------|------------------------------------------------------------------|------|------|------|
| 12577  | Cdkn1c | cyclin-dependent kinase inhibitor 1C (P57)                       | 214  | 220  | 223  |
| 12578  | Cdkn2a | cyclin-dependent kinase inhibitor 2A                             | 240  | 235  | 232  |
| 12579  | Cdkn2b | cyclin-dependent kinase inhibitor 2B (p15, inhibits CDK4)        | 411  | 400  | 391  |
| 12580  | Cdkn2c | cyclin-dependent kinase inhibitor 2C (p18, inhibits CDK4)        | 182  | 181  | 178  |
| 12581  | Cdkn2d | cyclin-dependent kinase inhibitor 2D (p19, inhibits CDK4)        | 101  | 101  | 95   |
| 72391  | Cdkn3  | cyclin-dependent kinase inhibitor 3                              | 520  | 538  | 510  |
| 12583  | Cdo1   | cysteine dioxygenase 1, cytosolic                                | 189  | 183  | 184  |
| 57810  | Cdon   | cell adhesion molecule-related/down-regulated by oncogenes       | 378  | 390  | 370  |
| 74596  | Cds1   | CDP-diacylglycerol synthase 1                                    | 522  | 516  | 514  |
| 110911 | Cds2   | CDP-diacylglycerol synthase (phosphatidate cytidyltransferase) 2 | 181  | 171  | 168  |
| 67177  | Cdt1   | chromatin licensing and DNA replication factor 1                 | 34   | 30   | 33   |
| 12590  | Cdx1   | caudal type homeobox 1                                           | 36   | 39   | 38   |
| 12591  | Cdx2   | caudal type homeobox 2                                           | 70   | 58   | 64   |
| 12592  | Cdx4   | caudal type homeobox 4                                           | 123  | 129  | 119  |
| 12593  | Cdyl   | chromodomain protein, Y chromosome-like                          | 1278 | 1295 | 1261 |
| 12606  | Cebpa  | CCAAT/enhancer binding protein (C/EBP), alpha                    | 158  | 167  | 160  |
| 12608  | Cebpb  | CCAAT/enhancer binding protein (C/EBP), beta                     | 34   | 30   | 32   |
| 12609  | Cebpd  | CCAAT/enhancer binding protein (C/EBP), delta                    | 352  | 373  | 357  |
| 110794 | Cebpe  | CCAAT/enhancer binding protein (C/EBP), epsilon                  | 121  | 121  | 126  |
| 12611  | Cebpg  | CCAAT/enhancer binding protein (C/EBP), gamma                    | 261  | 256  | 256  |
| 12607  | Cebpz  | CCAAT/enhancer binding protein zeta                              | 33   | 25   | 28   |
| 214932 | Cecr5  | cat eye syndrome chromosome region, candidate 5 homolog (hum     | 224  | 228  | 224  |
| 12613  | Cel    | carboxyl ester lipase                                            | 66   | 63   | 67   |
| 109901 | Cela1  | chymotrypsin-like elastase family, member 1                      | 112  | 100  | 106  |
| 13706  | Cela2a | chymotrypsin-like elastase family, member 2A                     | 68   | 72   | 74   |
| 67868  | Cela3b | chymotrypsin-like elastase family, member 3B                     | 54   | 53   | 53   |
| 13046  | Celf1  | CUGBP, Elav-like family member 1                                 | 160  | 162  | 156  |
| 14007  | Celf2  | CUGBP, Elav-like family member 2                                 | 4864 | 4886 | 4827 |
| 78784  | Celf3  | VCUGBP, Elav-like family member 3                                | 138  | 140  | 137  |
| 108013 | Celf4  | CUGBP, Elav-like family member 4                                 | 6431 | 6505 | 6439 |
| 76183  | Celf6  | CUGBP, Elav-like family member 6                                 | 94   | 102  | 101  |
| 12615  | Cenpa  | centromere protein A                                             | 83   | 81   | 86   |
| 108000 | Cenpf  | centromere protein F                                             | 509  | 510  | 488  |
| 60411  | Cenpk  | centromere protein K                                             | 72   | 80   | 73   |
| 73139  | Cenpv  | centromere protein V                                             | 123  | 131  | 127  |
| 214552 | Cep164 | centrosomal protein 164                                          | 518  | 513  | 528  |
| 216274 | Cep290 | centrosomal protein 290                                          | 126  | 136  | 131  |
| 99712  | Cept1  | choline/ethanolaminephosphotransferase 1                         | 76   | 84   | 76   |
| 99151  | Cercam | cerebral endothelial cell adhesion molecule                      | 59   | 55   | 59   |
| 223753 | Cerk   | ceramide kinase                                                  | 200  | 186  | 194  |
| 228094 | Cerkl  | ceramide kinase-like                                             | 254  | 256  | 263  |
| 13884  | Ces1c  | carboxylesterase 1C                                              | 152  | 155  | 153  |
| 104158 | Ces1d  | carboxylesterase 1D                                              | 120  | 125  | 117  |
| 13897  | Ces1e  | carboxylesterase 1E                                              | 106  | 108  | 101  |
| 102022 | Ces2a  | carboxylesterase 2A                                              | 245  | 247  | 233  |
| 234673 | Ces2e  | carboxylesterase 2E                                              | 107  | 99   | 99   |
| 72361  | Ces2g  | carboxylesterase 2G                                              | 129  | 125  | 129  |
| 67935  | Ces5a  | carboxylesterase 5A                                              | 607  | 629  | 588  |
| 26370  | Cetn2  | centrin 2                                                        | 118  | 110  | 111  |
| 14962  | Cfb    | complement factor B                                              | 40   | 42   | 45   |
| 11537  | Cfd    | complement factor D (adipsin)                                    | 24   | 26   | 26   |
| 12630  | Cfi    | complement component factor i                                    | 63   | 60   | 65   |
| 12631  | Cfl1   | cofilin 1, non-muscle                                            | 13   | 17   | 15   |
| 12633  | Cflar  | CASP8 and FADD-like apoptosis regulator                          | 134  | 130  | 120  |
| 18636  | Cfp    | complement factor properdin                                      | 38   | 36   | 34   |

|        |         |                                                                      |      |      |      |
|--------|---------|----------------------------------------------------------------------|------|------|------|
| 12638  | Cftr    | cystic fibrosis transmembrane conductance regulator homolog          | 501  | 508  | 494  |
| 12640  | Cga     | glycoprotein hormones, alpha subunit                                 | 346  | 344  | 358  |
| 106143 | Cggbp1  | CGG triplet repeat binding protein 1                                 | 401  | 415  | 396  |
| 12642  | Ch25h   | cholesterol 25-hydroxylase                                           | 297  | 303  | 292  |
| 27221  | Chaf1a  | chromatin assembly factor 1, subunit A (p150)                        | 51   | 54   | 51   |
| 110749 | Chaf1b  | chromatin assembly factor 1, subunit B (p60)                         | 123  | 124  | 131  |
| 12647  | Chat    | choline acetyltransferase                                            | 68   | 66   | 68   |
| 12648  | Chd1    | chromodomain helicase DNA binding protein 1                          | 342  | 334  | 329  |
| 68058  | Chd1l   | chromodomain helicase DNA binding protein 1-like                     | 291  | 274  | 279  |
| 107932 | Chd4    | chromodomain helicase DNA binding protein 4                          | 71   | 70   | 72   |
| 320790 | Chd7    | chromodomain helicase DNA binding protein 7                          | 932  | 939  | 936  |
| 67772  | Chd8    | chromodomain helicase DNA binding protein 8                          | 87   | 92   | 92   |
| 109151 | Chd9    | chromodomain helicase DNA binding protein 9                          | 916  | 935  | 933  |
| 218865 | Chdh    | choline dehydrogenase                                                | 485  | 460  | 467  |
| 12649  | Chek1   | checkpoint kinase 1 homolog (S. pombe)                               | 96   | 100  | 99   |
| 50883  | Chek2   | CHK2 checkpoint homolog (S. pombe)                                   | 57   | 57   | 56   |
| 27967  | Cherp   | calcium homeostasis endoplasmic reticulum protein                    | 58   | 59   | 55   |
| 231600 | Chfr    | checkpoint with forkhead and ring finger domains                     | 87   | 86   | 82   |
| 12654  | Chi3l1  | chitinase 3-like 1                                                   | 102  | 101  | 113  |
| 12655  | Chi3l3  | chitinase 3-like 3                                                   | 135  | 141  | 139  |
| 104183 | Chi3l4  | chitinase 3-like 4                                                   | 311  | 303  | 308  |
| 81600  | Chia    | chitinase, acidic                                                    | 194  | 193  | 194  |
| 68038  | Chid1   | chitinase domain containing 1                                        | 109  | 116  | 118  |
| 71884  | Chit1   | chitinase 1 (chitotriosidase)                                        | 131  | 127  | 141  |
| 12660  | Chka    | choline kinase alpha                                                 | 176  | 166  | 181  |
| 12651  | Chkb    | choline kinase beta                                                  | 34   | 32   | 34   |
| 234852 | Chmp1a  | chromatin modifying protein 1A                                       | 32   | 34   | 33   |
| 66917  | Chordc1 | cysteine and histidine-rich domain (CHORD)-containing, zinc-binding  | 2547 | 2572 | 2536 |
| 212862 | Chpt1   | choline phosphotransferase 1                                         | 186  | 191  | 185  |
| 12672  | Chrm4   | cholinergic receptor, muscarinic 4                                   | 269  | 260  | 261  |
| 11438  | Chrna4  | cholinergic receptor, nicotinic, alpha polypeptide 4                 | 193  | 189  | 188  |
| 11441  | Chrna7  | cholinergic receptor, nicotinic, alpha polypeptide 7                 | 1252 | 1244 | 1239 |
| 76969  | Chst1   | carbohydrate (keratan sulfate Gal-6) sulfotransferase 1              | 599  | 582  | 589  |
| 98388  | Chst10  | carbohydrate sulfotransferase 10                                     | 148  | 155  | 150  |
| 58250  | Chst11  | carbohydrate sulfotransferase 11                                     | 486  | 506  | 492  |
| 59031  | Chst12  | carbohydrate sulfotransferase 12                                     | 188  | 180  | 188  |
| 71797  | Chst13  | carbohydrate (chondroitin 4) sulfotransferase 13                     | 45   | 44   | 47   |
| 72136  | Chst14  | carbohydrate (N-acetylgalactosamine 4-O) sulfotransferase 14         | 151  | 151  | 163  |
| 77590  | Chst15  | carbohydrate (N-acetylgalactosamine 4-sulfate 6-O) sulfotransferase  | 330  | 322  | 341  |
| 54371  | Chst2   | carbohydrate sulfotransferase 2                                      | 1077 | 1092 | 1060 |
| 53374  | Chst3   | carbohydrate (chondroitin 6/keratan) sulfotransferase 3              | 222  | 228  | 220  |
| 26887  | Chst4   | carbohydrate (chondroitin 6/keratan) sulfotransferase 4              | 124  | 117  | 114  |
| 56773  | Chst5   | carbohydrate (N-acetylglucosamine 6-O) sulfotransferase 5            | 75   | 77   | 74   |
| 60322  | Chst7   | carbohydrate (N-acetylglucosamine) sulfotransferase 7                | 1428 | 1390 | 1381 |
| 68947  | Chst8   | carbohydrate (N-acetylgalactosamine 4-O) sulfotransferase 8          | 338  | 333  | 337  |
| 71367  | Chst9   | carbohydrate (N-acetylgalactosamine 4-O) sulfotransferase 9          | 1799 | 1784 | 1778 |
| 269941 | Chsy1   | chondroitin sulfate synthase 1                                       | 413  | 411  | 408  |
| 214901 | Chtf18  | CTF18, chromosome transmission fidelity factor 18 homolog (S. ce     | 11   | 11   | 9    |
| 214987 | Chtf8   | CTF8, chromosome transmission fidelity factor 8 homolog (S. cere     | 29   | 31   | 30   |
| 12675  | Chuk    | conserved helix-loop-helix ubiquitous kinase                         | 89   | 83   | 87   |
| 211151 | Churc1  | churchill domain containing 1                                        | 115  | 105  | 117  |
| 26371  | Ciao1   | cytosolic iron-sulfur protein assembly 1 homolog (S. cerevisiae)     | 49   | 51   | 50   |
| 71722  | Cic     | capicua homolog (Drosophila)                                         | 44   | 45   | 47   |
| 12683  | Cidea   | cell death-inducing DNA fragmentation factor, alpha subunit-like efi | 73   | 71   | 65   |
| 12265  | Ciita   | class II transactivator                                              | 120  | 119  | 116  |

|        |        |                                                                       |      |      |      |
|--------|--------|-----------------------------------------------------------------------|------|------|------|
| 214425 | Cilp   | cartilage intermediate layer protein, nucleotide pyrophosphohydroly   | 113  | 103  | 105  |
| 67236  | Cinp   | cyclin-dependent kinase 2 interacting protein                         | 51   | 49   | 54   |
| 66935  | Cir1   | corepressor interacting with RBPJ, 1                                  | 53   | 54   | 47   |
| 12696  | Cirbp  | cold inducible RNA binding protein                                    | 26   | 29   | 26   |
| 67006  | Cisd2  | CDGSH iron sulfur domain 2                                            | 114  | 112  | 115  |
| 12704  | Cit    | citron                                                                | 383  | 390  | 392  |
| 12705  | Cited1 | Cbp/p300-interacting transactivator with Glu/Asp-rich carboxy-term    | 390  | 374  | 364  |
| 17684  | Cited2 | Cbp/p300-interacting transactivator, with Glu/Asp-rich carboxy-term   | 899  | 922  | 891  |
| 56222  | Cited4 | Cbp/p300-interacting transactivator, with Glu/Asp-rich carboxy-term   | 202  | 203  | 204  |
| 68379  | Ciz1   | CDKN1A interacting zinc finger protein 1                              | 34   | 31   | 34   |
| 12709  | Ckb    | creatine kinase, brain                                                | 129  | 128  | 132  |
| 12715  | Ckm    | creatine kinase, muscle                                               | 74   | 67   | 68   |
| 12716  | Ckmt1  | creatine kinase, mitochondrial 1, ubiquitous                          | 41   | 41   | 37   |
| 76722  | Ckmt2  | creatine kinase, mitochondrial 2                                      | 384  | 397  | 408  |
| 66197  | Cks2   | CDC28 protein kinase regulatory subunit 2                             | 112  | 101  | 102  |
| 53609  | Clasrp | CLK4-associating serine/arginine rich protein                         | 64   | 65   | 68   |
| 56708  | Clcf1  | cardiotrophin-like cytokine factor 1                                  | 39   | 38   | 37   |
| 12745  | Clgn   | calmegin                                                              | 131  | 122  | 121  |
| 76686  | Clip3  | CAP-GLY domain containing linker protein 3                            | 34   | 38   | 40   |
| 12747  | Clk1   | CDC-like kinase 1                                                     | 71   | 69   | 63   |
| 12748  | Clk2   | CDC-like kinase 2                                                     | 22   | 22   | 20   |
| 102414 | Clk3   | CDC-like kinase 3                                                     | 155  | 148  | 162  |
| 12750  | Clk4   | CDC like kinase 4                                                     | 32   | 34   | 34   |
| 12752  | Cln3   | ceroid lipofuscinosis, neuronal 3, juvenile (Batten, Spielmeyer-Vogt) | 24   | 25   | 26   |
| 76524  | Cln6   | ceroid-lipofuscinosis, neuronal 6                                     | 53   | 59   | 60   |
| 26889  | Cln8   | ceroid-lipofuscinosis, neuronal 8                                     | 1039 | 1053 | 1044 |
| 12753  | Clock  | circadian locomotor output cycles kaput                               | 179  | 190  | 181  |
| 98985  | Cip1   | CLP1, cleavage and polyadenylation factor I subunit, homolog (S. c    | 27   | 26   | 28   |
| 53895  | Cipp   | caseinolytic peptidase, ATP-dependent, proteolytic subunit homolo     | 19   | 18   | 20   |
| 109791 | Cips   | colipase, pancreatic                                                  | 38   | 33   | 38   |
| 270166 | Cipx   | caseinolytic peptidase X (E.coli)                                     | 102  | 105  | 105  |
| 269582 | Cispn  | claspin homolog (Xenopus laevis)                                      | 101  | 95   | 101  |
| 67300  | Citc   | clathrin, heavy polypeptide (Hc)                                      | 151  | 159  | 163  |
| 12759  | Clu    | clusterin                                                             | 64   | 75   | 69   |
| 69634  | Clybl  | citrate lyase beta like                                               | 164  | 154  | 159  |
| 17228  | Cma1   | chymase 1, mast cell                                                  | 69   | 75   | 62   |
| 545055 | Cma2   | chymase 2, mast cell                                                  | 76   | 78   | 80   |
| 12763  | Cmah   | cytidine monophospho-N-acetylneuraminic acid hydroxylase              | 544  | 529  | 560  |
| 12764  | Cmas   | cytidine monophospho-N-acetylneuraminic acid synthetase               | 125  | 139  | 128  |
| 66116  | Cml1   | camello-like 1                                                        | 14   | 14   | 14   |
| 93673  | Cml2   | camello-like 2                                                        | 91   | 89   | 85   |
| 69049  | Cml5   | camello-like 5                                                        | 30   | 29   | 27   |
| 66588  | Cmpk1  | cytidine monophosphate (UMP-CMP) kinase 1                             | 107  | 94   | 98   |
| 22169  | Cmpk2  | cytidine monophosphate (UMP-CMP) kinase 2, mitochondrial              | 1144 | 1157 | 1134 |
| 73381  | Cmtm2a | CKLF-like MARVEL transmembrane domain containing 2A                   | 91   | 90   | 94   |
| 12785  | Cnbp   | cellular nucleic acid binding protein                                 | 66   | 59   | 64   |
| 338403 | Cndp1  | carnosine dipeptidase 1 (metallopeptidase M20 family)                 | 113  | 124  | 115  |
| 66054  | Cndp2  | CNDP dipeptidase 2 (metallopeptidase M20 family)                      | 98   | 96   | 91   |
| 30952  | Cngb3  | cyclic nucleotide gated channel beta 3                                | 2191 | 2142 | 2104 |
| 194231 | Cnksr1 | connector enhancer of kinase suppressor of Ras 1                      | 25   | 21   | 23   |
| 245684 | Cnksr2 | connector enhancer of kinase suppressor of Ras 2                      | 1743 | 1747 | 1645 |
| 215748 | Cnksr3 | Cnksr family member 3                                                 | 598  | 598  | 582  |
| 12798  | Cnn2   | calponin 2                                                            | 17   | 14   | 14   |
| 234594 | Cnot1  | CCR4-NOT transcription complex, subunit 1                             | 63   | 59   | 58   |
| 72068  | Cnot2  | CCR4-NOT transcription complex, subunit 2                             | 541  | 539  | 541  |

|        |          |                                                                      |      |      |      |
|--------|----------|----------------------------------------------------------------------|------|------|------|
| 232791 | Cnot3    | CCR4-NOT transcription complex, subunit 3                            | 49   | 40   | 48   |
| 53621  | Cnot4    | CCR4-NOT transcription complex, subunit 4                            | 262  | 264  | 260  |
| 104625 | Cnot6    | CCR4-NOT transcription complex, subunit 6                            | 171  | 167  | 166  |
| 231464 | Cnot6l   | CCR4-NOT transcription complex, subunit 6-like                       | 315  | 305  | 317  |
| 18983  | Cnot7    | CCR4-NOT transcription complex, subunit 7                            | 118  | 116  | 109  |
| 69125  | Cnot8    | CCR4-NOT transcription complex, subunit 8                            | 211  | 202  | 211  |
| 12799  | Cnp      | 2',3'-cyclic nucleotide 3' phosphodiesterase                         | 98   | 90   | 96   |
| 12801  | Cnr1     | cannabinoid receptor 1 (brain)                                       | 937  | 946  | 939  |
| 12803  | Cntf     | ciliary neurotrophic factor                                          | 123  | 134  | 128  |
| 12805  | Cntn1    | contactin 1                                                          | 879  | 856  | 847  |
| 21367  | Cntn2    | contactin 2                                                          | 173  | 169  | 172  |
| 636808 | Cntnap5a | contactin associated protein-like 5A                                 | 8199 | 8313 | 8090 |
| 71743  | Coasy    | Coenzyme A synthase                                                  | 10   | 12   | 10   |
| 58202  | Cobra1   | cofactor of BRCA1                                                    | 23   | 18   | 23   |
| 338337 | Cog3     | component of oligomeric golgi complex 3                              | 247  | 255  | 252  |
| 233824 | Cog7     | component of oligomeric golgi complex 7                              | 214  | 198  | 204  |
| 12812  | Coil     | coilin                                                               | 35   | 32   | 33   |
| 12814  | Col11a1  | collagen, type XI, alpha 1                                           | 1603 | 1624 | 1575 |
| 12842  | Col1a1   | collagen, type I, alpha 1                                            | 147  | 158  | 146  |
| 12824  | Col2a1   | collagen, type II, alpha 1                                           | 161  | 164  | 155  |
| 12825  | Col3a1   | collagen, type III, alpha 1                                          | 1201 | 1203 | 1169 |
| 12827  | Col4a2   | collagen, type IV, alpha 2                                           | 210  | 207  | 213  |
| 68018  | Col4a3bp | collagen, type IV, alpha 3 (Goodpasture antigen) binding protein     | 158  | 159  | 171  |
| 12831  | Col5a1   | collagen, type V, alpha 1                                            | 513  | 509  | 510  |
| 382864 | Colq     | collagen-like tail subunit (single strand of homotrimer) of asymmetr | 192  | 189  | 187  |
| 17846  | Commd1   | COMM domain containing 1                                             | 26   | 23   | 24   |
| 99311  | Commd7   | COMM domain containing 7                                             | 159  | 158  | 158  |
| 12846  | Comt     | catechol-O-methyltransferase                                         | 184  | 191  | 190  |
| 69156  | Comtd1   | catechol-O-methyltransferase domain containing 1                     | 199  | 202  | 193  |
| 12848  | Cops2    | COP9 (constitutive photomorphogenic) homolog, subunit 2 (Arabid      | 95   | 105  | 101  |
| 26572  | Cops3    | COP9 (constitutive photomorphogenic) homolog, subunit 3 (Arabid      | 48   | 49   | 51   |
| 26891  | Cops4    | COP9 (constitutive photomorphogenic) homolog, subunit 4 (Arabid      | 92   | 101  | 92   |
| 26754  | Cops5    | COP9 (constitutive photomorphogenic) homolog, subunit 5 (Arabid      | 41   | 36   | 36   |
| 26893  | Cops6    | COP9 (constitutive photomorphogenic) homolog, subunit 6 (Arabid      | 13   | 9    | 9    |
| 26894  | Cops7a   | COP9 (constitutive photomorphogenic) homolog, subunit 7a (Arabi      | 88   | 83   | 84   |
| 26895  | Cops7b   | COP9 (constitutive photomorphogenic) homolog, subunit 7b (Arabi      | 117  | 121  | 121  |
| 108679 | Cops8    | COP9 (constitutive photomorphogenic) homolog, subunit 8 (Arabid      | 922  | 924  | 928  |
| 71883  | Coq2     | coenzyme Q2 homolog, prenyltransferase (yeast)                       | 196  | 199  | 198  |
| 230027 | Coq3     | coenzyme Q3 homolog, methyltransferase (yeast)                       | 106  | 105  | 109  |
| 227683 | Coq4     | coenzyme Q4 homolog (yeast)                                          | 20   | 22   | 20   |
| 52064  | Coq5     | coenzyme Q5 homolog, methyltransferase (yeast)                       | 37   | 34   | 40   |
| 12850  | Coq7     | demethyl-Q 7                                                         | 123  | 124  | 125  |
| 67914  | Coq9     | coenzyme Q9 homolog (yeast)                                          | 23   | 25   | 28   |
| 53419  | Corin    | corin                                                                | 464  | 456  | 449  |
| 70383  | Cox10    | COX10 homolog, cytochrome c oxidase assembly protein, heme A         | 200  | 204  | 196  |
| 226139 | Cox15    | COX15 homolog, cytochrome c oxidase assembly protein (yeast)         | 82   | 83   | 77   |
| 12857  | Cox4i1   | cytochrome c oxidase subunit IV isoform 1                            | 82   | 88   | 87   |
| 84682  | Cox4i2   | cytochrome c oxidase subunit IV isoform 2                            | 124  | 124  | 126  |
| 12858  | Cox5a    | cytochrome c oxidase, subunit Va                                     | 41   | 38   | 40   |
| 12861  | Cox6a1   | cytochrome c oxidase, subunit VI a, polypeptide 1                    | 117  | 115  | 121  |
| 12862  | Cox6a2   | cytochrome c oxidase, subunit VI a, polypeptide 2                    | 87   | 81   | 82   |
| 110323 | Cox6b1   | cytochrome c oxidase, subunit VIb polypeptide 1                      | 35   | 35   | 33   |
| 333182 | Cox6b2   | cytochrome c oxidase subunit VIb polypeptide 2                       | 37   | 37   | 40   |
| 12864  | Cox6c    | cytochrome c oxidase, subunit VIc                                    | 602  | 613  | 616  |
| 12865  | Cox7a1   | cytochrome c oxidase, subunit VIIa 1                                 | 34   | 35   | 32   |

|        |         |                                                            |      |      |      |
|--------|---------|------------------------------------------------------------|------|------|------|
| 12866  | Cox7a2  | cytochrome c oxidase, subunit VIIa 2                       | 100  | 96   | 96   |
| 20463  | Cox7a2l | cytochrome c oxidase subunit VIIa polypeptide 2-like       | 371  | 372  | 370  |
| 66142  | Cox7b   | cytochrome c oxidase subunit VIIb                          | 21   | 20   | 14   |
| 12867  | Cox7c   | cytochrome c oxidase, subunit VIIc                         | 4390 | 4491 | 4408 |
| 12868  | Cox8a   | cytochrome c oxidase, subunit VIIIA                        | 44   | 48   | 46   |
| 12869  | Cox8b   | cytochrome c oxidase, subunit VIIIB                        | 28   | 33   | 25   |
| 75483  | Cox8c   | cytochrome c oxidase, subunit VIIIC                        | 93   | 91   | 88   |
| 12870  | Cp      | ceruloplasmin                                              | 179  | 179  | 184  |
| 109697 | Cpa1    | carboxypeptidase A1                                        | 112  | 105  | 102  |
| 232680 | Cpa2    | carboxypeptidase A2, pancreatic                            | 71   | 71   | 69   |
| 12873  | Cpa3    | carboxypeptidase A3, mast cell                             | 151  | 153  | 149  |
| 71791  | Cpa4    | carboxypeptidase A4                                        | 91   | 93   | 97   |
| 74649  | Cpa5    | carboxypeptidase A5                                        | 91   | 89   | 83   |
| 329093 | Cpa6    | carboxypeptidase A6                                        | 1012 | 975  | 947  |
| 76703  | Cpb1    | carboxypeptidase B1 (tissue)                               | 163  | 162  | 160  |
| 56373  | Cpb2    | carboxypeptidase B2 (plasma)                               | 195  | 196  | 188  |
| 12874  | Cpd     | carboxypeptidase D                                         | 176  | 168  | 173  |
| 12876  | Cpe     | carboxypeptidase E                                         | 276  | 278  | 284  |
| 12877  | Cpeb1   | cytoplasmic polyadenylation element binding protein 1      | 187  | 189  | 191  |
| 70574  | Cpm     | carboxypeptidase M                                         | 431  | 435  | 431  |
| 93721  | Cpn1    | carboxypeptidase N, polypeptide 1                          | 160  | 153  | 148  |
| 70568  | Cpne3   | copine III                                                 | 375  | 383  | 370  |
| 12892  | Cpox    | coproporphyrinogen oxidase                                 | 95   | 103  | 98   |
| 227231 | Cps1    | carbamoyl-phosphate synthetase 1                           | 2605 | 2653 | 2597 |
| 94230  | Cpsf1   | cleavage and polyadenylation specific factor 1             | 46   | 52   | 51   |
| 51786  | Cpsf2   | cleavage and polyadenylation specific factor 2             | 221  | 214  | 213  |
| 54451  | Cpsf3   | cleavage and polyadenylation specificity factor 3          | 39   | 42   | 43   |
| 54188  | Cpsf4   | cleavage and polyadenylation specific factor 4             | 33   | 30   | 32   |
| 432508 | Cpsf6   | cleavage and polyadenylation specific factor 6             | 437  | 428  | 433  |
| 269061 | Cpsf7   | cleavage and polyadenylation specific factor 7             | 38   | 43   | 44   |
| 12894  | Cpt1a   | carnitine palmitoyltransferase 1a, liver                   | 134  | 138  | 131  |
| 12895  | Cpt1b   | carnitine palmitoyltransferase 1b, muscle                  | 28   | 25   | 24   |
| 78070  | Cpt1c   | carnitine palmitoyltransferase 1c                          | 52   | 50   | 53   |
| 12896  | Cpt2    | carnitine palmitoyltransferase 2                           | 103  | 101  | 104  |
| 71287  | Cpvl    | carboxypeptidase, vitellogenic-like                        | 292  | 276  | 284  |
| 56264  | Cpxm1   | carboxypeptidase X 1 (M14 family)                          | 133  | 129  | 138  |
| 55987  | Cpxm2   | carboxypeptidase X 2 (M14 family)                          | 454  | 467  | 432  |
| 242939 | Cpz     | carboxypeptidase Z                                         | 236  | 231  | 246  |
| 12946  | Cr1l    | complement component (3b/4b) receptor 1-like               | 109  | 108  | 105  |
| 12904  | Crabp2  | cellular retinoic acid binding protein II                  | 55   | 58   | 52   |
| 12908  | Crat    | carnitine acetyltransferase                                | 27   | 33   | 30   |
| 58799  | Crbn    | cereblon                                                   | 964  | 977  | 972  |
| 12909  | Crcp    | calcitonin gene-related peptide-receptor component protein | 64   | 64   | 58   |
| 12912  | Creb1   | cAMP responsive element binding protein 1                  | 615  | 636  | 621  |
| 12913  | Creb3   | cAMP responsive element binding protein 3                  | 18   | 23   | 23   |
| 26427  | Creb3l1 | cAMP responsive element binding protein 3-like 1           | 272  | 277  | 274  |
| 208647 | Creb3l2 | cAMP responsive element binding protein 3-like 2           | 295  | 285  | 287  |
| 208677 | Creb3l3 | cAMP responsive element binding protein 3-like 3           | 46   | 44   | 49   |
| 78284  | Creb3l4 | cAMP responsive element binding protein 3-like 4           | 22   | 20   | 20   |
| 231991 | Creb5   | cAMP responsive element binding protein 5                  | 679  | 689  | 668  |
| 12914  | Crebbp  | CREB binding protein                                       | 191  | 197  | 181  |
| 232430 | Crebl2  | cAMP responsive element binding protein-like 2             | 123  | 127  | 123  |
| 233490 | Crebzf  | CREB/ATF bZIP transcription factor                         | 37   | 36   | 38   |
| 433375 | Creg1   | cellular repressor of E1A-stimulated genes 1               | 103  | 107  | 105  |
| 263764 | Creg2   | cellular repressor of E1A-stimulated genes 2               | 182  | 182  | 179  |

|        |            |                                                         |      |      |      |
|--------|------------|---------------------------------------------------------|------|------|------|
| 12916  | Crem       | cAMP responsive element modulator                       | 360  | 354  | 356  |
| 12918  | Crh        | corticotropin releasing hormone                         | 319  | 326  | 316  |
| 12919  | Crhbp      | corticotropin releasing hormone binding protein         | 126  | 136  | 132  |
| 12922  | Crhr2      | corticotropin releasing hormone receptor 2              | 177  | 179  | 168  |
| 12931  | Crif1      | cytokine receptor-like factor 1                         | 21   | 17   | 24   |
| 54394  | Crif3      | cytokine receptor-like factor 3                         | 129  | 126  | 131  |
| 66586  | Crls1      | cardiolipin synthase 1                                  | 86   | 89   | 85   |
| 12933  | Crmp1      | collapsin response mediator protein 1                   | 374  | 367  | 383  |
| 66877  | Crnk1      | Crn, crooked neck-like 1 (Drosophila)                   | 40   | 42   | 37   |
| 74114  | Crot       | carnitine O-octanoyltransferase                         | 261  | 266  | 249  |
| 12944  | Crp        | C-reactive protein, pentraxin-related                   | 335  | 338  | 333  |
| 382056 | Crtc1      | CREB regulated transcription coactivator 1              | 132  | 111  | 126  |
| 74343  | Crtc2      | CREB regulated transcription coactivator 2              | 22   | 19   | 19   |
| 70461  | Crtc3      | CREB regulated transcription coactivator 3              | 342  | 347  | 347  |
| 12951  | Crx        | cone-rod homeobox containing gene                       | 68   | 64   | 64   |
| 12952  | Cry1       | cryptochrome 1 (photolyase-like)                        | 247  | 241  | 236  |
| 12953  | Cry2       | cryptochrome 2 (photolyase-like)                        | 76   | 73   | 76   |
| 12954  | Cryaa      | crystallin, alpha A                                     | 260  | 252  | 264  |
| 12955  | Cryab      | crystallin, alpha B                                     | 22   | 23   | 21   |
| 68631  | Cryl1      | crystallin, lambda 1                                    | 377  | 370  | 369  |
| 12971  | Crym       | crystallin, mu                                          | 39   | 39   | 36   |
| 12972  | Cryz       | crystallin, zeta                                        | 337  | 339  | 343  |
| 66609  | Cryz1      | crystallin, zeta (quinone reductase)-like 1             | 53   | 56   | 58   |
| 12974  | Cs         | citrate synthase                                        | 65   | 59   | 64   |
| 246277 | Csad       | cysteine sulfinic acid decarboxylase                    | 81   | 75   | 74   |
| 56449  | Csda       | cold shock domain protein A                             | 392  | 405  | 400  |
| 105859 | Csdc2      | cold shock domain containing C2, RNA binding            | 45   | 40   | 43   |
| 12977  | Csf1       | colony stimulating factor 1 (macrophage)                | 238  | 231  | 222  |
| 12978  | Csf1r      | colony stimulating factor 1 receptor                    | 167  | 166  | 170  |
| 12981  | Csf2       | colony stimulating factor 2 (granulocyte-macrophage)    | 214  | 215  | 206  |
| 234356 | Csgalnact1 | chondroitin sulfate N-acetylgalactosaminyltransferase 1 | 673  | 672  | 654  |
| 78752  | Csgalnact2 | chondroitin sulfate N-acetylgalactosaminyltransferase 2 | 172  | 169  | 168  |
| 12988  | Csk        | c-src tyrosine kinase                                   | 77   | 79   | 80   |
| 71832  | Csl        | citrate synthase like                                   | 470  | 481  | 457  |
| 93687  | Csnk1a1    | casein kinase 1, alpha 1                                | 141  | 140  | 141  |
| 104318 | Csnk1d     | casein kinase 1, delta                                  | 110  | 117  | 120  |
| 27373  | Csnk1e     | casein kinase 1, epsilon                                | 127  | 126  | 130  |
| 214897 | Csnk1g1    | casein kinase 1, gamma 1                                | 196  | 196  | 199  |
| 103236 | Csnk1g2    | casein kinase 1, gamma 2                                | 78   | 76   | 71   |
| 70425  | Csnk1g3    | casein kinase 1, gamma 3                                | 1590 | 1596 | 1552 |
| 12995  | Csnk2a1    | casein kinase 2, alpha 1 polypeptide                    | 197  | 197  | 201  |
| 13000  | Csnk2a2    | casein kinase 2, alpha prime polypeptide                | 135  | 126  | 129  |
| 13001  | Csnk2b     | casein kinase 2, beta polypeptide                       | 6    | 7    | 5    |
| 121021 | Cspg4      | chondroitin sulfate proteoglycan 4                      | 102  | 94   | 96   |
| 215418 | Csmp1      | cysteine-serine-rich nuclear protein 1                  | 115  | 103  | 111  |
| 207785 | Csmp2      | cysteine-serine-rich nuclear protein 2                  | 105  | 103  | 106  |
| 77771  | Csmp3      | cysteine-serine-rich nuclear protein 3                  | 596  | 574  | 582  |
| 228714 | Csrp2bp    | cysteine and glycine-rich protein 2 binding protein     | 115  | 119  | 115  |
| 13010  | Cst3       | cystatin C                                              | 716  | 709  | 700  |
| 67337  | Cstf1      | cleavage stimulation factor, 3' pre-RNA, subunit 1      | 28   | 31   | 25   |
| 108062 | Cstf2      | cleavage stimulation factor, 3' pre-RNA subunit 2       | 118  | 108  | 98   |
| 83410  | Cstf2t     | cleavage stimulation factor, 3' pre-RNA subunit 2, tau  | 360  | 362  | 355  |
| 228410 | Cstf3      | cleavage stimulation factor, 3' pre-RNA, subunit 3      | 284  | 286  | 279  |
| 13016  | Ctbp1      | C-terminal binding protein 1                            | 161  | 150  | 160  |
| 13017  | Ctbp2      | C-terminal binding protein 2                            | 984  | 974  | 986  |

|        |          |                                                                 |      |      |      |
|--------|----------|-----------------------------------------------------------------|------|------|------|
| 74245  | Ctbs     | chitinase, di-N-acetyl-                                         | 120  | 123  | 119  |
| 13018  | Ctcf     | CCCTC-binding factor                                            | 93   | 90   | 99   |
| 664799 | Ctcf1    | CCCTC-binding factor (zinc finger protein)-like                 | 175  | 173  | 172  |
| 227292 | Ctdsp1   | CTD (carboxy-terminal domain, RNA polymerase II, polypeptide A) | 22   | 15   | 19   |
| 52468  | Ctdsp2   | CTD (carboxy-terminal domain, RNA polymerase II, polypeptide A) | 115  | 123  | 122  |
| 14219  | Ctgf     | connective tissue growth factor                                 | 627  | 630  | 628  |
| 107869 | Cth      | cystathionase (cystathionine gamma-lyase)                       | 482  | 493  | 478  |
| 269037 | Ctif     | CBP80/20-dependent translation initiation factor                | 580  | 575  | 588  |
| 12387  | Ctnnb1   | catenin (cadherin associated protein), beta 1                   | 921  | 921  | 901  |
| 67087  | Ctnnbip1 | catenin beta interacting protein 1                              | 167  | 163  | 165  |
| 12388  | Ctnnd1   | catenin (cadherin associated protein), delta 1                  | 238  | 228  | 248  |
| 18163  | Ctnnd2   | catenin (cadherin associated protein), delta 2                  | 3788 | 3825 | 3749 |
| 83429  | Ctns     | cystinosis, nephropathic                                        | 31   | 29   | 31   |
| 51797  | Ctps     | cytidine 5'-triphosphate synthase                               | 72   | 66   | 67   |
| 55936  | Ctps2    | cytidine 5'-triphosphate synthase 2                             | 88   | 99   | 92   |
| 22083  | Ctr9     | Ctr9, Paf1/RNA polymerase II complex component, homolog (S. ce  | 133  | 128  | 127  |
| 66473  | Ctrb1    | chymotrypsinogen B1                                             | 119  | 117  | 119  |
| 76701  | Ctrc     | chymotrypsin C (caldecrin)                                      | 59   | 64   | 64   |
| 109660 | Ctrl     | chymotrypsin-like                                               | 53   | 47   | 48   |
| 56092  | Cts7     | cathepsin 7                                                     | 330  | 332  | 328  |
| 56094  | Cts8     | cathepsin 8                                                     | 102  | 109  | 100  |
| 19025  | Ctsa     | cathepsin A                                                     | 8    | 8    | 7    |
| 13030  | Ctsb     | cathepsin B                                                     | 153  | 162  | 173  |
| 13032  | Ctsc     | cathepsin C                                                     | 1074 | 1074 | 1059 |
| 13033  | Ctsd     | cathepsin D                                                     | 78   | 79   | 78   |
| 13034  | Ctse     | cathepsin E                                                     | 116  | 111  | 112  |
| 56464  | Ctsf     | cathepsin F                                                     | 48   | 44   | 47   |
| 13035  | Ctsg     | cathepsin G                                                     | 44   | 48   | 44   |
| 13036  | Ctsh     | cathepsin H                                                     | 263  | 262  | 271  |
| 26898  | Ctsj     | cathepsin J                                                     | 135  | 128  | 119  |
| 13038  | Ctsk     | cathepsin K                                                     | 120  | 122  | 120  |
| 13039  | Ctsl     | cathepsin L                                                     | 162  | 156  | 148  |
| 70202  | Ctsll3   | cathepsin L-like 3                                              | 95   | 92   | 99   |
| 64139  | Ctsm     | cathepsin M                                                     | 288  | 285  | 264  |
| 229445 | Ctso     | cathepsin O                                                     | 1167 | 1192 | 1193 |
| 56835  | Ctsr     | cathepsin R                                                     | 200  | 202  | 213  |
| 13040  | Ctss     | cathepsin S                                                     | 79   | 85   | 86   |
| 13041  | Ctsw     | cathepsin W                                                     | 18   | 17   | 15   |
| 64138  | Ctsz     | cathepsin Z                                                     | 49   | 47   | 42   |
| 233189 | Ctu1     | cytosolic thiouridylase subunit 1 homolog (S. pombe)            | 38   | 34   | 36   |
| 66965  | Ctu2     | cytosolic thiouridylase subunit 2 homolog (S. pombe)            | 90   | 90   | 92   |
| 65969  | Cubn     | cubilin (intrinsic factor-cobalamin receptor)                   | 356  | 353  | 342  |
| 26965  | Cul1     | cullin 1                                                        | 463  | 452  | 448  |
| 71745  | Cul2     | cullin 2                                                        | 215  | 226  | 237  |
| 26554  | Cul3     | cullin 3                                                        | 659  | 708  | 666  |
| 99375  | Cul4a    | cullin 4A                                                       | 70   | 66   | 71   |
| 72584  | Cul4b    | cullin 4B                                                       | 173  | 169  | 164  |
| 75717  | Cul5     | cullin 5                                                        | 127  | 127  | 120  |
| 66515  | Cul7     | cullin 7                                                        | 36   | 30   | 30   |
| 13047  | Cux1     | cut-like homeobox 1                                             | 397  | 402  | 420  |
| 13048  | Cux2     | cut-like homeobox 2                                             | 319  | 316  | 319  |
| 66070  | Cwc15    | CWC15 homolog (S. cerevisiae)                                   | 148  | 145  | 155  |
| 80744  | Cwc22    | CWC22 spliceosome-associated protein homolog (S. cerevisiae)    | 532  | 541  | 520  |
| 67285  | Cwc27    | CWC27 spliceosome-associated protein homolog (S. cerevisiae)    | 671  | 691  | 664  |
| 231293 | Cwh43    | cell wall biogenesis 43 C-terminal homolog (S. cerevisiae)      | 175  | 183  | 179  |

|        |          |                                                        |      |      |      |
|--------|----------|--------------------------------------------------------|------|------|------|
| 74322  | Cxxc1    | CXXC finger 1 (PHD domain)                             | 76   | 80   | 77   |
| 109672 | Cyb5     | cytochrome b-5                                         | 281  | 278  | 267  |
| 13056  | Cyb561   | cytochrome b-561                                       | 483  | 487  | 493  |
| 72023  | Cyb561d1 | cytochrome b-561 domain containing 1                   | 36   | 26   | 30   |
| 56368  | Cyb561d2 | cytochrome b-561 domain containing 2                   | 11   | 12   | 10   |
| 66427  | Cyb5b    | cytochrome b5 type B                                   | 259  | 260  | 260  |
| 72017  | Cyb5r1   | cytochrome b5 reductase 1                              | 35   | 40   | 39   |
| 320635 | Cyb5r2   | cytochrome b5 reductase 2                              | 253  | 250  | 243  |
| 109754 | Cyb5r3   | cytochrome b5 reductase 3                              | 125  | 132  | 130  |
| 266690 | Cyb5r4   | cytochrome b5 reductase 4                              | 159  | 160  | 171  |
| 230582 | Cyb5rl   | cytochrome b5 reductase-like                           | 41   | 40   | 41   |
| 13057  | Cyba     | cytochrome b-245, alpha polypeptide                    | 26   | 24   | 24   |
| 225912 | Cybasc3  | cytochrome b, ascorbate dependent 3                    | 35   | 37   | 35   |
| 13058  | Cybb     | cytochrome b-245, beta polypeptide                     | 276  | 278  | 277  |
| 73649  | Cybrd1   | cytochrome b reductase 1                               | 211  | 203  | 193  |
| 66445  | Cyc1     | cytochrome c-1                                         | 20   | 21   | 21   |
| 13063  | Cycs     | cytochrome c, somatic                                  | 138  | 147  | 141  |
| 13067  | Cyct     | cytochrome c, testis                                   | 41   | 42   | 42   |
| 114886 | Cygb     | cytoglobin                                             | 30   | 36   | 32   |
| 54151  | Cyhr1    | cysteine and histidine rich 1                          | 26   | 26   | 25   |
| 74256  | Cyld     | cylindromatosis (turban tumor syndrome)                | 515  | 519  | 504  |
| 229697 | Cym      | chymosin                                               | 73   | 74   | 73   |
| 13070  | Cyp11a1  | cytochrome P450, family 11, subfamily a, polypeptide 1 | 214  | 201  | 210  |
| 110115 | Cyp11b1  | cytochrome P450, family 11, subfamily b, polypeptide 1 | 44   | 50   | 48   |
| 13072  | Cyp11b2  | cytochrome P450, family 11, subfamily b, polypeptide 2 | 56   | 52   | 51   |
| 13074  | Cyp17a1  | cytochrome P450, family 17, subfamily a, polypeptide 1 | 86   | 83   | 81   |
| 13075  | Cyp19a1  | cytochrome P450, family 19, subfamily a, polypeptide 1 | 284  | 274  | 272  |
| 13076  | Cyp1a1   | cytochrome P450, family 1, subfamily a, polypeptide 1  | 44   | 46   | 45   |
| 13077  | Cyp1a2   | cytochrome P450, family 1, subfamily a, polypeptide 2  | 61   | 62   | 57   |
| 13078  | Cyp1b1   | cytochrome P450, family 1, subfamily b, polypeptide 1  | 354  | 351  | 357  |
| 77951  | Cyp20a1  | cytochrome P450, family 20, subfamily A, polypeptide 1 | 293  | 298  | 290  |
| 13079  | Cyp21a1  | cytochrome P450, family 21, subfamily a, polypeptide 1 | 100  | 104  | 90   |
| 13081  | Cyp24a1  | cytochrome P450, family 24, subfamily a, polypeptide 1 | 19   | 19   | 17   |
| 13082  | Cyp26a1  | cytochrome P450, family 26, subfamily a, polypeptide 1 | 455  | 456  | 444  |
| 232174 | Cyp26b1  | cytochrome P450, family 26, subfamily b, polypeptide 1 | 1321 | 1344 | 1339 |
| 546726 | Cyp26c1  | cytochrome P450, family 26, subfamily c, polypeptide 1 | 185  | 187  | 177  |
| 104086 | Cyp27a1  | cytochrome P450, family 27, subfamily a, polypeptide 1 | 116  | 105  | 122  |
| 13115  | Cyp27b1  | cytochrome P450, family 27, subfamily b, polypeptide 1 | 25   | 22   | 22   |
| 13085  | Cyp2a12  | cytochrome P450, family 2, subfamily a, polypeptide 12 | 238  | 234  | 223  |
| 233005 | Cyp2a22  | cytochrome P450, family 2, subfamily a, polypeptide 22 | 245  | 253  | 259  |
| 13086  | Cyp2a4   | cytochrome P450, family 2, subfamily a, polypeptide 4  | 169  | 164  | 178  |
| 13087  | Cyp2a5   | cytochrome P450, family 2, subfamily a, polypeptide 5  | 168  | 166  | 171  |
| 224044 | Cyp2ab1  | cytochrome P450, family 2, subfamily ab, polypeptide 1 | 156  | 157  | 166  |
| 13088  | Cyp2b10  | cytochrome P450, family 2, subfamily b, polypeptide 10 | 313  | 316  | 320  |
| 13089  | Cyp2b13  | cytochrome P450, family 2, subfamily b, polypeptide 13 | 356  | 354  | 343  |
| 13090  | Cyp2b19  | cytochrome P450, family 2, subfamily b, polypeptide 19 | 156  | 157  | 152  |
| 243881 | Cyp2b23  | cytochrome P450, family 2, subfamily b, polypeptide 23 | 190  | 193  | 183  |
| 13094  | Cyp2b9   | cytochrome P450, family 2, subfamily b, polypeptide 9  | 258  | 264  | 251  |
| 13095  | Cyp2c29  | cytochrome P450, family 2, subfamily c, polypeptide 29 | 296  | 290  | 291  |
| 13096  | Cyp2c37  | cytochrome P450, family 2, subfamily c, polypeptide 37 | 237  | 244  | 237  |
| 13097  | Cyp2c38  | cytochrome P450, family 2, subfamily c, polypeptide 38 | 284  | 270  | 289  |
| 13098  | Cyp2c39  | cytochrome P450, family 2, subfamily c, polypeptide 39 | 233  | 241  | 233  |
| 13099  | Cyp2c40  | cytochrome P450, family 2, subfamily c, polypeptide 40 | 171  | 195  | 169  |
| 226143 | Cyp2c44  | cytochrome P450, family 2, subfamily c, polypeptide 44 | 108  | 116  | 114  |
| 107141 | Cyp2c50  | cytochrome P450, family 2, subfamily c, polypeptide 50 | 142  | 145  | 148  |

|           |          |                                                         |     |     |     |
|-----------|----------|---------------------------------------------------------|-----|-----|-----|
| 404195    | Cyp2c54  | cytochrome P450, family 2, subfamily c, polypeptide 54  | 114 | 121 | 120 |
| 72082     | Cyp2c55  | cytochrome P450, family 2, subfamily c, polypeptide 55  | 167 | 163 | 169 |
| 72303     | Cyp2c65  | cytochrome P450, family 2, subfamily c, polypeptide 65  | 137 | 137 | 137 |
| 69888     | Cyp2c66  | cytochrome P450, family 2, subfamily c, polypeptide 66  | 218 | 218 | 209 |
| 545288    | Cyp2c67  | cytochrome P450, family 2, subfamily c, polypeptide 67  | 287 | 292 | 285 |
| 433247    | Cyp2c68  | cytochrome P450, family 2, subfamily c, polypeptide 68  | 209 | 209 | 188 |
| 100043108 | Cyp2c69  | cytochrome P450, family 2, subfamily c, polypeptide 69  | 232 | 233 | 222 |
| 226105    | Cyp2c70  | cytochrome P450, family 2, subfamily c, polypeptide 70  | 236 | 238 | 230 |
| 13101     | Cyp2d10  | cytochrome P450, family 2, subfamily d, polypeptide 10  | 71  | 80  | 70  |
| 545123    | Cyp2d11  | cytochrome P450, family 2, subfamily d, polypeptide 11  | 36  | 32  | 34  |
| 380997    | Cyp2d12  | cytochrome P450, family 2, subfamily d, polypeptide 12  | 217 | 228 | 214 |
| 56448     | Cyp2d22  | cytochrome P450, family 2, subfamily d, polypeptide 22  | 50  | 49  | 47  |
| 76279     | Cyp2d26  | cytochrome P450, family 2, subfamily d, polypeptide 26  | 176 | 172 | 178 |
| 223706    | Cyp2d34  | cytochrome P450, family 2, subfamily d, polypeptide 34  | 117 | 117 | 116 |
| 71754     | Cyp2d40  | cytochrome P450, family 2, subfamily d, polypeptide 40  | 124 | 139 | 134 |
| 13105     | Cyp2d9   | cytochrome P450, family 2, subfamily d, polypeptide 9   | 190 | 191 | 189 |
| 13106     | Cyp2e1   | cytochrome P450, family 2, subfamily e, polypeptide 1   | 111 | 115 | 109 |
| 13107     | Cyp2f2   | cytochrome P450, family 2, subfamily f, polypeptide 2   | 162 | 167 | 162 |
| 13108     | Cyp2g1   | cytochrome P450, family 2, subfamily g, polypeptide 1   | 102 | 91  | 104 |
| 100066    | Cyp2j11  | cytochrome P450, family 2, subfamily j, polypeptide 11  | 343 | 344 | 351 |
| 230459    | Cyp2j13  | cytochrome P450, family 2, subfamily j, polypeptide 13  | 223 | 212 | 213 |
| 13109     | Cyp2j5   | cytochrome P450, family 2, subfamily j, polypeptide 5   | 255 | 252 | 255 |
| 13110     | Cyp2j6   | cytochrome P450, family 2, subfamily j, polypeptide 6   | 116 | 111 | 109 |
| 74519     | Cyp2j9   | cytochrome P450, family 2, subfamily j, polypeptide 9   | 145 | 144 | 141 |
| 244209    | Cyp2r1   | cytochrome P450, family 2, subfamily r, polypeptide 1   | 280 | 286 | 279 |
| 74134     | Cyp2s1   | cytochrome P450, family 2, subfamily s, polypeptide 1   | 141 | 144 | 138 |
| 384724    | Cyp2t4   | cytochrome P450, family 2, subfamily t, polypeptide 4   | 60  | 56  | 57  |
| 71519     | Cyp2u1   | cytochrome P450, family 2, subfamily u, polypeptide 1   | 91  | 89  | 91  |
| 545817    | Cyp2w1   | cytochrome P450, family 2, subfamily w, polypeptide 1   | 27  | 24  | 31  |
| 56050     | Cyp39a1  | cytochrome P450, family 39, subfamily a, polypeptide 1  | 171 | 177 | 175 |
| 13112     | Cyp3a11  | cytochrome P450, family 3, subfamily a, polypeptide 11  | 267 | 268 | 261 |
| 13113     | Cyp3a13  | cytochrome P450, family 3, subfamily a, polypeptide 13  | 122 | 111 | 110 |
| 13114     | Cyp3a16  | cytochrome P450, family 3, subfamily a, polypeptide 16  | 313 | 306 | 304 |
| 56388     | Cyp3a25  | cytochrome P450, family 3, subfamily a, polypeptide 25  | 251 | 252 | 258 |
| 53973     | Cyp3a41a | cytochrome P450, family 3, subfamily a, polypeptide 41A | 416 | 404 | 403 |
| 337924    | Cyp3a44  | cytochrome P450, family 3, subfamily a, polypeptide 44  | 202 | 206 | 200 |
| 100041449 | Cyp3a59  | cytochrome P450, subfamily 3A, polypeptide 59           | 216 | 236 | 215 |
| 13116     | Cyp46a1  | cytochrome P450, family 46, subfamily a, polypeptide 1  | 129 | 125 | 132 |
| 13117     | Cyp4a10  | cytochrome P450, family 4, subfamily a, polypeptide 10  | 85  | 87  | 86  |
| 277753    | Cyp4a12a | cytochrome P450, family 4, subfamily a, polypeptide 12a | 222 | 218 | 210 |
| 13118     | Cyp4a12b | cytochrome P450, family 4, subfamily a, polypeptide 12B | 195 | 202 | 193 |
| 13119     | Cyp4a14  | cytochrome P450, family 4, subfamily a, polypeptide 14  | 87  | 85  | 83  |
| 666168    | Cyp4a31  | cytochrome P450, family 4, subfamily a, polypeptide 31  | 87  | 86  | 81  |
| 100040843 | Cyp4a32  | cytochrome P450, family 4, subfamily a, polypeptide 32  | 77  | 82  | 81  |
| 13120     | Cyp4b1   | cytochrome P450, family 4, subfamily b, polypeptide 1   | 170 | 176 | 169 |
| 170716    | Cyp4f13  | cytochrome P450, family 4, subfamily f, polypeptide 13  | 62  | 68  | 67  |
| 64385     | Cyp4f14  | cytochrome P450, family 4, subfamily f, polypeptide 14  | 73  | 80  | 70  |
| 106648    | Cyp4f15  | cytochrome P450, family 4, subfamily f, polypeptide 15  | 166 | 164 | 171 |
| 70101     | Cyp4f16  | cytochrome P450, family 4, subfamily f, polypeptide 16  | 146 | 150 | 144 |
| 72054     | Cyp4f18  | cytochrome P450, family 4, subfamily f, polypeptide 18  | 140 | 139 | 138 |
| 320997    | Cyp4f39  | cytochrome P450, family 4, subfamily f, polypeptide 39  | 107 | 112 | 117 |
| 102294    | Cyp4v3   | cytochrome P450, family 4, subfamily v, polypeptide 3   | 110 | 109 | 111 |
| 81906     | Cyp4x1   | cytochrome P450, family 4, subfamily x, polypeptide 1   | 204 | 193 | 189 |
| 13121     | Cyp51    | cytochrome P450, family 51                              | 341 | 344 | 346 |
| 13122     | Cyp7a1   | cytochrome P450, family 7, subfamily a, polypeptide 1   | 233 | 226 | 220 |

|        |               |                                                             |      |      |      |
|--------|---------------|-------------------------------------------------------------|------|------|------|
| 13123  | Cyp7b1        | cytochrome P450, family 7, subfamily b, polypeptide 1       | 1425 | 1437 | 1397 |
| 13124  | Cyp8b1        | cytochrome P450, family 8, subfamily b, polypeptide 1       | 45   | 52   | 49   |
| 16007  | Cyr61         | cysteine rich protein 61                                    | 232  | 240  | 230  |
| 231162 | Cyt1l         | cytokine-like 1                                             | 141  | 135  | 131  |
| 28088  | D10Wsu52e     | DNA segment, Chr 10, Wayne State University 52, expressed   | 99   | 113  | 101  |
| 219132 | D14Ertdd668e  | DNA segment, Chr 14, ERATO Doi 668, expressed               | 68   | 67   | 69   |
| 98314  | D2hgdh        | D-2-hydroxyglutarate dehydrogenase                          | 80   | 77   | 78   |
| 269952 | D330012F22Rik | RIKEN cDNA D330012F22 gene                                  | 14   | 16   | 19   |
| 229791 | D3Bwg0562e    | DNA segment, Chr 3, Brigham & Women's Genetics 0562 express | 636  | 639  | 638  |
| 110958 | D6Mm5e        | DNA segment, Chr 6, Miriam Meisler 5, expressed             | 111  | 121  | 112  |
| 68171  | D730048I06Rik | RIKEN cDNA D730048I06 gene                                  | 86   | 87   | 85   |
| 244418 | D8Ertdd82e    | DNA segment, Chr 8, ERATO Doi 82, expressed                 | 546  | 546  | 551  |
| 13132  | Dab2          | disabled homolog 2 (Drosophila)                             | 1653 | 1675 | 1648 |
| 69601  | Dab2ip        | disabled homolog 2 (Drosophila) interacting protein         | 836  | 817  | 828  |
| 13134  | Dach1         | dachshund 1 (Drosophila)                                    | 3178 | 3181 | 3137 |
| 93837  | Dach2         | dachshund 2 (Drosophila)                                    | 1466 | 1489 | 1375 |
| 13137  | Daf2          | decay accelerating factor 2                                 | 1513 | 1521 | 1498 |
| 13138  | Dag1          | dystroglycan 1                                              | 132  | 120  | 131  |
| 269060 | Dagla         | diacylglycerol lipase, alpha                                | 189  | 175  | 187  |
| 231871 | Daglb         | diacylglycerol lipase, beta                                 | 160  | 154  | 157  |
| 225913 | Dak           | dihydroxyacetone kinase 2 homolog (yeast)                   | 33   | 35   | 35   |
| 67789  | Dalrd3        | DALR anticodon binding domain containing 3                  | 11   | 13   | 8    |
| 13142  | Dao           | D-amino acid oxidase                                        | 122  | 123  | 119  |
| 223453 | Dap           | death-associated protein                                    | 1559 | 1523 | 1523 |
| 69635  | Dapk1         | death associated protein kinase 1                           | 745  | 748  | 755  |
| 13143  | Dapk2         | death-associated protein kinase 2                           | 302  | 287  | 289  |
| 13144  | Dapk3         | death-associated protein kinase 3                           | 18   | 21   | 21   |
| 226414 | Dars          | aspartyl-tRNA synthetase                                    | 304  | 287  | 294  |
| 226539 | Dars2         | aspartyl-tRNA synthetase 2 (mitochondrial)                  | 43   | 41   | 42   |
| 13163  | Daxx          | Fas death domain-associated protein                         | 30   | 32   | 30   |
| 13164  | Dazl          | deleted in azoospermia-like                                 | 418  | 417  | 413  |
| 27214  | Dbf4          | DBF4 homolog (S. cerevisiae)                                | 75   | 75   | 69   |
| 13166  | Dbh           | dopamine beta hydroxylase                                   | 136  | 134  | 132  |
| 13167  | Dbi           | diazepam binding inhibitor                                  | 58   | 61   | 60   |
| 13170  | Dbp           | D site albumin promoter binding protein                     | 17   | 17   | 17   |
| 83703  | Dbr1          | debranching enzyme homolog 1 (S. cerevisiae)                | 57   | 55   | 55   |
| 13171  | Dbt           | dihydrolipoamide branched chain transacylase E2             | 73   | 73   | 77   |
| 223499 | Dcaf13        | DDB1 and CUL4 associated factor 13                          | 114  | 109  | 107  |
| 74106  | Dcaf6         | DDB1 and CUL4 associated factor 6                           | 212  | 208  | 209  |
| 68087  | Dcakd         | dephospho-CoA kinase domain containing                      | 79   | 83   | 79   |
| 13178  | Dck           | deoxycytidine kinase                                        | 212  | 208  | 213  |
| 13175  | Dclk1         | doublecortin-like kinase 1                                  | 1024 | 1062 | 1031 |
| 70762  | Dclk2         | doublecortin-like kinase 2                                  | 560  | 566  | 568  |
| 245038 | Dclk3         | doublecortin-like kinase 3                                  | 491  | 477  | 479  |
| 55947  | Dclre1a       | DNA cross-link repair 1A, PSO2 homolog (S. cerevisiae)      | 112  | 121  | 112  |
| 140917 | Dclre1b       | DNA cross-link repair 1B, PSO2 homolog (S. cerevisiae)      | 25   | 26   | 27   |
| 227525 | Dclre1c       | DNA cross-link repair 1C, PSO2 homolog (S. cerevisiae)      | 69   | 68   | 66   |
| 13179  | Dcn           | decorin                                                     | 1229 | 1197 | 1186 |
| 75901  | Dcp1a         | DCP1 decapping enzyme homolog A (S. cerevisiae)             | 179  | 182  | 180  |
| 319618 | Dcp1b         | DCP1 decapping enzyme homolog b (S. cerevisiae)             | 112  | 108  | 101  |
| 70640  | Dcp2          | DCP2 decapping enzyme homolog (S. cerevisiae)               | 425  | 422  | 421  |
| 69305  | Dcps          | decapping enzyme, scavenger                                 | 109  | 104  | 109  |
| 13190  | Dct           | dopachrome tautomerase                                      | 1583 | 1571 | 1531 |
| 320685 | Dctd          | dCMP deaminase                                              | 895  | 914  | 873  |
| 22428  | Dctn6         | dynactin 6                                                  | 182  | 180  | 181  |

|           |         |                                                                  |      |      |      |
|-----------|---------|------------------------------------------------------------------|------|------|------|
| 66422     | Dctpp1  | dCTP pyrophosphatase 1                                           | 33   | 38   | 40   |
| 67880     | Dcxr    | dicarbonyl L-xylulose reductase                                  | 16   | 11   | 13   |
| 69219     | Ddah1   | dimethylarginine dimethylaminohydrolase 1                        | 371  | 351  | 353  |
| 51793     | Ddah2   | dimethylarginine dimethylaminohydrolase 2                        | 18   | 14   | 16   |
| 13194     | Ddb1    | damage specific DNA binding protein 1                            | 39   | 34   | 39   |
| 107986    | Ddb2    | damage specific DNA binding protein 2                            | 41   | 42   | 42   |
| 13195     | Ddc     | dopa decarboxylase                                               | 304  | 304  | 305  |
| 114874    | Ddhd1   | DDHD domain containing 1                                         | 715  | 706  | 714  |
| 72108     | Ddhd2   | DDHD domain containing 2                                         | 83   | 87   | 87   |
| 71829     | Ddi1    | DDI1, DNA-damage inducible 1, homolog 1 (S. cerevisiae)          | 1294 | 1312 | 1289 |
| 68817     | Ddi2    | DNA-damage inducible protein 2                                   | 81   | 77   | 80   |
| 13198     | Ddit3   | DNA-damage inducible transcript 3                                | 27   | 28   | 28   |
| 74747     | Ddit4   | DNA-damage-inducible transcript 4                                | 159  | 155  | 160  |
| 70503     | Ddo     | D-aspartate oxidase                                              | 142  | 144  | 146  |
| 13200     | Ddost   | dolichyl-di-phosphooligosaccharide-protein glycotransferase      | 80   | 82   | 81   |
| 12305     | Ddr1    | discoïdin domain receptor family, member 1                       | 200  | 195  | 197  |
| 18214     | Ddr2    | discoïdin domain receptor family, member 2                       | 268  | 270  | 279  |
| 13202     | Ddt     | D-dopachrome tautomerase                                         | 22   | 21   | 23   |
| 104721    | Ddx1    | DEAD (Asp-Glu-Ala-Asp) box polypeptide 1                         | 419  | 417  | 423  |
| 320209    | Ddx11   | DEAD/H (Asp-Glu-Ala-Asp/His) box polypeptide 11 (CHL1-like heli  | 437  | 437  | 442  |
| 234733    | Ddx19b  | DEAD (Asp-Glu-Ala-Asp) box polypeptide 19b                       | 50   | 52   | 58   |
| 53975     | Ddx20   | DEAD (Asp-Glu-Ala-Asp) box polypeptide 20                        | 319  | 323  | 321  |
| 56200     | Ddx21   | DEAD (Asp-Glu-Ala-Asp) box polypeptide 21                        | 90   | 95   | 98   |
| 74351     | Ddx23   | DEAD (Asp-Glu-Ala-Asp) box polypeptide 23                        | 58   | 55   | 58   |
| 30959     | Ddx25   | DEAD (Asp-Glu-Ala-Asp) box polypeptide 25                        | 137  | 135  | 133  |
| 227674    | Ddx31   | DEAD/H (Asp-Glu-Ala-Asp/His) box polypeptide 31                  | 99   | 102  | 97   |
| 68278     | Ddx39   | DEAD (Asp-Glu-Ala-Asp) box polypeptide 39                        | 54   | 50   | 50   |
| 53817     | Ddx39b  | DEAD (Asp-Glu-Ala-Asp) box polypeptide 39B                       | 32   | 36   | 29   |
| 13205     | Ddx3x   | DEAD/H (Asp-Glu-Ala-Asp/His) box polypeptide 3, X-linked         | 488  | 484  | 467  |
| 72935     | Ddx41   | DEAD (Asp-Glu-Ala-Asp) box polypeptide 41                        | 50   | 46   | 45   |
| 100048658 | Ddx43   | DEAD (Asp-Glu-Ala-Asp) box polypeptide 43                        | 81   | 88   | 84   |
| 212880    | Ddx46   | DEAD (Asp-Glu-Ala-Asp) box polypeptide 46                        | 89   | 92   | 88   |
| 67755     | Ddx47   | DEAD (Asp-Glu-Ala-Asp) box polypeptide 47                        | 107  | 117  | 111  |
| 13207     | Ddx5    | DEAD (Asp-Glu-Ala-Asp) box polypeptide 5                         | 5    | 7    | 5    |
| 69663     | Ddx51   | DEAD (Asp-Glu-Ala-Asp) box polypeptide 51                        | 151  | 147  | 143  |
| 71990     | Ddx54   | DEAD (Asp-Glu-Ala-Asp) box polypeptide 54                        | 26   | 27   | 25   |
| 52513     | Ddx56   | DEAD (Asp-Glu-Ala-Asp) box polypeptide 56                        | 59   | 53   | 55   |
| 230073    | Ddx58   | DEAD (Asp-Glu-Ala-Asp) box polypeptide 58                        | 164  | 167  | 167  |
| 234311    | Ddx60   | DEAD (Asp-Glu-Ala-Asp) box polypeptide 60                        | 281  | 283  | 280  |
| 54006     | Deaf1   | deformed epidermal autoregulatory factor 1 (Drosophila)          | 59   | 61   | 60   |
| 67460     | Decr1   | 2,4-dienoyl CoA reductase 1, mitochondrial                       | 92   | 104  | 94   |
| 26378     | Decr2   | 2-4-dienoyl-Coenzyme A reductase 2, peroxisomal                  | 34   | 35   | 36   |
| 21945     | Dedd    | death effector domain-containing                                 | 67   | 60   | 63   |
| 67379     | Dedd2   | death effector domain-containing DNA binding protein 2           | 116  | 109  | 114  |
| 13244     | Degs1   | degenerative spermatocyte homolog 1 (Drosophila)                 | 188  | 182  | 182  |
| 70059     | Degs2   | degenerative spermatocyte homolog 2 (Drosophila), lipid desatura | 198  | 215  | 201  |
| 73172     | Dem1    | defects in morphology 1 homolog (S. cerevisiae)                  | 93   | 90   | 92   |
| 68184     | Denr    | density-regulated protein                                        | 68   | 68   | 66   |
| 76131     | Depdc1a | DEP domain containing 1a                                         | 1307 | 1333 | 1280 |
| 232449    | Dera    | 2-deoxyribose-5-phosphate aldolase homolog (C. elegans)          | 451  | 447  | 434  |
| 67819     | Der1    | Der1-like domain family, member 1                                | 275  | 290  | 274  |
| 116891    | Der12   | Der1-like domain family, member 2                                | 18   | 19   | 23   |
| 13347     | Dffa    | DNA fragmentation factor, alpha subunit                          | 38   | 39   | 39   |
| 13368     | Dffb    | DNA fragmentation factor, beta subunit                           | 23   | 22   | 24   |
| 13350     | Dgat1   | diacylglycerol O-acyltransferase 1                               | 54   | 54   | 55   |

|        |         |                                                                  |      |      |      |
|--------|---------|------------------------------------------------------------------|------|------|------|
| 67800  | Dgat2   | diacylglycerol O-acyltransferase 2                               | 132  | 126  | 127  |
| 668257 | Dgat2l6 | diacylglycerol O-acyltransferase 2-like 6                        | 100  | 95   | 98   |
| 27886  | Dgcr14  | DiGeorge syndrome critical region gene 14                        | 20   | 21   | 22   |
| 94223  | Dgcr8   | DiGeorge syndrome critical region gene 8                         | 53   | 55   | 54   |
| 13139  | Dgka    | diacylglycerol kinase, alpha                                     | 58   | 54   | 55   |
| 217480 | Dgkb    | diacylglycerol kinase, beta                                      | 1925 | 1960 | 1874 |
| 227333 | Dgkd    | diacylglycerol kinase, delta                                     | 271  | 271  | 263  |
| 56077  | Dgke    | diacylglycerol kinase, epsilon                                   | 98   | 103  | 99   |
| 110197 | Dgkg    | diacylglycerol kinase, gamma                                     | 469  | 478  | 465  |
| 380921 | Dgkh    | diacylglycerol kinase, eta                                       | 393  | 408  | 402  |
| 320127 | Dgki    | diacylglycerol kinase, iota                                      | 816  | 816  | 811  |
| 331374 | Dgkk    | diacylglycerol kinase kappa                                      | 649  | 659  | 637  |
| 110524 | Dgkq    | diacylglycerol kinase, theta                                     | 50   | 49   | 49   |
| 104418 | Dgkz    | diacylglycerol kinase zeta                                       | 127  | 127  | 138  |
| 27369  | Dguok   | deoxyguanosine kinase                                            | 118  | 127  | 121  |
| 74754  | Dhcr24  | 24-dehydrocholesterol reductase                                  | 162  | 160  | 164  |
| 13360  | Dhcr7   | 7-dehydrocholesterol reductase                                   | 465  | 447  | 459  |
| 71755  | Dhdh    | dihydrodiol dehydrogenase (dimeric)                              | 56   | 57   | 60   |
| 13361  | Dhfr    | dihydrofolate reductase                                          | 288  | 284  | 286  |
| 13363  | Dhh     | desert hedgehog                                                  | 41   | 46   | 39   |
| 56749  | Dhodh   | dihydroorotate dehydrogenase                                     | 44   | 47   | 46   |
| 330817 | Dhps    | deoxyhypusine synthase                                           | 17   | 16   | 18   |
| 52585  | Dhrs1   | dehydrogenase/reductase (SDR family) member 1                    | 32   | 33   | 30   |
| 192970 | Dhrs11  | dehydrogenase/reductase (SDR family) member 11                   | 70   | 61   | 64   |
| 70451  | Dhrs13  | dehydrogenase/reductase (SDR family) member 13                   | 75   | 71   | 77   |
| 71412  | Dhrs2   | dehydrogenase/reductase member 2                                 | 488  | 468  | 472  |
| 20148  | Dhrs3   | dehydrogenase/reductase (SDR family) member 3                    | 514  | 513  | 534  |
| 28200  | Dhrs4   | dehydrogenase/reductase (SDR family) member 4                    | 364  | 343  | 335  |
| 66375  | Dhrs7   | dehydrogenase/reductase (SDR family) member 7                    | 296  | 299  | 299  |
| 216820 | Dhrs7b  | dehydrogenase/reductase (SDR family) member 7B                   | 91   | 93   | 95   |
| 68460  | Dhrs7c  | dehydrogenase/reductase (SDR family) member 7C                   | 200  | 202  | 191  |
| 241452 | Dhrs9   | dehydrogenase/reductase (SDR family) member 9                    | 318  | 323  | 313  |
| 209692 | Dhtkd1  | dehydrogenase E1 and transketolase domain containing 1           | 74   | 75   | 73   |
| 13204  | Dhx15   | DEAH (Asp-Glu-Ala-His) box polypeptide 15                        | 815  | 827  | 808  |
| 218629 | Dhx29   | DEAH (Asp-Glu-Ala-His) box polypeptide 29                        | 78   | 82   | 79   |
| 64340  | Dhx38   | DEAH (Asp-Glu-Ala-His) box polypeptide 38                        | 85   | 96   | 88   |
| 217207 | Dhx8    | DEAH (Asp-Glu-Ala-His) box polypeptide 8                         | 155  | 159  | 160  |
| 13211  | Dhx9    | DEAH (Asp-Glu-Ala-His) box polypeptide 9                         | 175  | 165  | 175  |
| 192119 | Dicer1  | Dicer1, Dcr-1 homolog (Drosophila)                               | 512  | 504  | 495  |
| 23856  | Dido1   | death inducer-obliterator 1                                      | 95   | 104  | 98   |
| 66254  | Dimt1   | DIM1 dimethyladenosine transferase 1-like (S. cerevisiae)        | 110  | 106  | 108  |
| 13370  | Dio1    | deiodinase, iodothyronine, type I                                | 79   | 80   | 84   |
| 13371  | Dio2    | deiodinase, iodothyronine, type II                               | 3063 | 3088 | 3091 |
| 107585 | Dio3    | deiodinase, iodothyronine type III                               | 207  | 216  | 203  |
| 64451  | Dip2a   | DIP2 disco-interacting protein 2 homolog A (Drosophila)          | 245  | 236  | 240  |
| 239667 | Dip2b   | DIP2 disco-interacting protein 2 homolog B (Drosophila)          | 486  | 467  | 489  |
| 208666 | Diras1  | DIRAS family, GTP-binding RAS-like 1                             | 22   | 22   | 24   |
| 68203  | Diras2  | DIRAS family, GTP-binding RAS-like 2                             | 944  | 958  | 957  |
| 72662  | Dis3    | DIS3 mitotic control homolog (S. cerevisiae)                     | 265  | 252  | 250  |
| 213550 | Dis3l   | DIS3 mitotic control homolog (S. cerevisiae)-like                | 140  | 138  | 135  |
| 245474 | Dkc1    | dyskeratosis congenita 1, dyskerin homolog (human)               | 60   | 56   | 58   |
| 13380  | Dkk1    | dickkopf homolog 1 (Xenopus laevis)                              | 487  | 496  | 491  |
| 50781  | Dkk3    | dickkopf homolog 3 (Xenopus laevis)                              | 266  | 264  | 260  |
| 235339 | Dlat    | dihydrolipoamide S-acetyltransferase (E2 component of pyruvate d | 144  | 141  | 145  |
| 50768  | Dlc1    | deleted in liver cancer 1                                        | 1003 | 1011 | 1006 |

|        |          |                                                                  |      |      |      |
|--------|----------|------------------------------------------------------------------|------|------|------|
| 13382  | Dld      | dihydrolipoamide dehydrogenase                                   | 222  | 233  | 212  |
| 13383  | Dlg1     | discs, large homolog 1 (Drosophila)                              | 572  | 585  | 563  |
| 78920  | Dlst     | dihydrolipoamide S-succinyltransferase (E2 component of 2-oxo-gl | 56   | 57   | 52   |
| 13390  | Dlx1     | distal-less homeobox 1                                           | 109  | 109  | 111  |
| 13392  | Dlx2     | distal-less homeobox 2                                           | 227  | 235  | 224  |
| 13395  | Dlx5     | distal-less homeobox 5                                           | 118  | 108  | 113  |
| 320038 | Dlx6os1  | Dlx6 opposite strand transcript 1                                | 20   | 21   | 19   |
| 66233  | Dmap1    | DNA methyltransferase 1-associated protein 1                     | 274  | 283  | 282  |
| 140477 | Dmbx1    | diencephalon/mesencephalon homeobox 1                            | 174  | 173  | 167  |
| 13404  | Dmc1     | DMC1 dosage suppressor of mck1 homolog, meiosis-specific hom     | 149  | 143  | 146  |
| 13405  | Dmd      | dystrophin, muscular dystrophy                                   | 2323 | 2404 | 2217 |
| 74129  | Dmgdh    | dimethylglycine dehydrogenase precursor                          | 135  | 121  | 128  |
| 13400  | Dmpk     | dystrophia myotonica-protein kinase                              | 12   | 9    | 11   |
| 240590 | Dmrt3    | doublesex and mab-3 related transcription factor 3               | 214  | 216  | 210  |
| 242523 | Dmrta1   | doublesex and mab-3 related transcription factor like family A1  | 1171 | 1197 | 1165 |
| 56296  | Dmrtdb1  | DMRT-like family B with proline-rich C-terminal, 1               | 478  | 471  | 477  |
| 70887  | Dmrtdc1a | DMRT-like family C1a                                             | 87   | 77   | 84   |
| 71241  | Dmrtdc2  | doublesex and mab-3 related transcription factor like family C2  | 20   | 19   | 20   |
| 23857  | Dmtf1    | cyclin D binding myb-like transcription factor 1                 | 213  | 215  | 220  |
| 327762 | Dna2     | DNA replication helicase 2 homolog (yeast)                       | 75   | 77   | 80   |
| 110084 | Dnahc1   | dynein, axonemal, heavy chain 1                                  | 107  | 104  | 112  |
| 56087  | Dnahc10  | dynein, axonemal, heavy chain 10                                 | 225  | 226  | 224  |
| 13411  | Dnahc11  | dynein, axonemal, heavy chain 11                                 | 590  | 594  | 589  |
| 110082 | Dnahc5   | dynein, axonemal, heavy chain 5                                  | 2722 | 2665 | 2698 |
| 432611 | Dnaic2   | dynein, axonemal, intermediate chain 2                           | 114  | 119  | 124  |
| 15502  | Dnaja1   | DnaJ (Hsp40) homolog, subfamily A, member 1                      | 75   | 66   | 72   |
| 56445  | Dnaja2   | DnaJ (Hsp40) homolog, subfamily A, member 2                      | 267  | 262  | 265  |
| 83945  | Dnaja3   | DnaJ (Hsp40) homolog, subfamily A, member 3                      | 45   | 49   | 48   |
| 58233  | Dnaja4   | DnaJ (Hsp40) homolog, subfamily A, member 4                      | 90   | 94   | 90   |
| 81489  | Dnajb1   | DnaJ (Hsp40) homolog, subfamily B, member 1                      | 72   | 75   | 71   |
| 67838  | Dnajb11  | DnaJ (Hsp40) homolog, subfamily B, member 11                     | 43   | 42   | 45   |
| 56709  | Dnajb12  | DnaJ (Hsp40) homolog, subfamily B, member 12                     | 316  | 312  | 318  |
| 69387  | Dnajb13  | DnaJ (Hsp40) related, subfamily B, member 13                     | 53   | 57   | 52   |
| 70604  | Dnajb14  | DnaJ (Hsp40) homolog, subfamily B, member 14                     | 71   | 71   | 70   |
| 56812  | Dnajb2   | DnaJ (Hsp40) homolog, subfamily B, member 2                      | 62   | 62   | 62   |
| 15504  | Dnajb3   | DnaJ (Hsp40) homolog, subfamily B, member 3                      | 16   | 13   | 13   |
| 67035  | Dnajb4   | DnaJ (Hsp40) homolog, subfamily B, member 4                      | 76   | 77   | 77   |
| 56323  | Dnajb5   | DnaJ (Hsp40) homolog, subfamily B, member 5                      | 66   | 62   | 62   |
| 23950  | Dnajb6   | DnaJ (Hsp40) homolog, subfamily B, member 6                      | 232  | 216  | 233  |
| 57755  | Dnajb7   | DnaJ (Hsp40) homolog, subfamily B, member 7                      | 86   | 80   | 88   |
| 56691  | Dnajb8   | DnaJ (Hsp40) homolog, subfamily B, member 8                      | 314  | 329  | 315  |
| 27362  | Dnajb9   | DnaJ (Hsp40) homolog, subfamily B, member 9                      | 3921 | 4006 | 3903 |
| 13418  | Dnajc1   | DnaJ (Hsp40) homolog, subfamily C, member 1                      | 769  | 800  | 780  |
| 66861  | Dnajc10  | DnaJ (Hsp40) homolog, subfamily C, member 10                     | 202  | 205  | 199  |
| 230935 | Dnajc11  | DnaJ (Hsp40) homolog, subfamily C, member 11                     | 160  | 159  | 170  |
| 30045  | Dnajc12  | DnaJ (Hsp40) homolog, subfamily C, member 12                     | 122  | 125  | 120  |
| 74330  | Dnajc14  | DnaJ (Hsp40) homolog, subfamily C, member 14                     | 21   | 21   | 20   |
| 214063 | Dnajc16  | DnaJ (Hsp40) homolog, subfamily C, member 16                     | 64   | 58   | 61   |
| 69408  | Dnajc17  | DnaJ (Hsp40) homolog, subfamily C, member 17                     | 28   | 27   | 29   |
| 76594  | Dnajc18  | DnaJ (Hsp40) homolog, subfamily C, member 18                     | 79   | 78   | 84   |
| 22791  | Dnajc2   | DnaJ (Hsp40) homolog, subfamily C, member 2                      | 58   | 58   | 65   |
| 72778  | Dnajc22  | DnaJ (Hsp40) homolog, subfamily C, member 22                     | 47   | 44   | 45   |
| 99349  | Dnajc24  | DnaJ (Hsp40) homolog, subfamily C, member 24                     | 1011 | 1008 | 993  |
| 72429  | Dnajc25  | DnaJ (Hsp40) homolog, subfamily C, member 25                     | 63   | 63   | 58   |
| 217378 | Dnajc27  | DnaJ (Hsp40) homolog, subfamily C, member 27                     | 124  | 129  | 121  |

|           |          |                                                                  |      |      |      |
|-----------|----------|------------------------------------------------------------------|------|------|------|
| 100037258 | Dnajc3   | DnaJ (Hsp40) homolog, subfamily C, member 3                      | 212  | 222  | 237  |
| 66114     | Dnajc30  | DnaJ (Hsp40) homolog, subfamily C, member 30                     | 18   | 17   | 14   |
| 57431     | Dnajc4   | DnaJ (Hsp40) homolog, subfamily C, member 4                      | 11   | 10   | 10   |
| 13002     | Dnajc5   | DnaJ (Hsp40) homolog, subfamily C, member 5                      | 108  | 103  | 99   |
| 66326     | Dnajc5b  | DnaJ (Hsp40) homolog, subfamily C, member 5 beta                 | 463  | 456  | 469  |
| 56354     | Dnajc7   | DnaJ (Hsp40) homolog, subfamily C, member 7                      | 63   | 60   | 61   |
| 68598     | Dnajc8   | DnaJ (Hsp40) homolog, subfamily C, member 8                      | 41   | 40   | 36   |
| 108671    | Dnajc9   | DnaJ (Hsp40) homolog, subfamily C, member 9                      | 59   | 54   | 56   |
| 13419     | Dnase1   | deoxyribonuclease I                                              | 94   | 103  | 97   |
| 69537     | Dnase111 | deoxyribonuclease 1-like 1                                       | 11   | 14   | 13   |
| 66705     | Dnase112 | deoxyribonuclease 1-like 2                                       | 36   | 30   | 34   |
| 13421     | Dnase113 | deoxyribonuclease 1-like 3                                       | 248  | 242  | 238  |
| 13423     | Dnase2a  | deoxyribonuclease II alpha                                       | 41   | 38   | 40   |
| 56629     | Dnase2b  | deoxyribonuclease II beta                                        | 76   | 69   | 70   |
| 227325    | Dner     | delta/notch-like EGF-related receptor                            | 718  | 721  | 697  |
| 13429     | Dnm1     | dynamamin 1                                                      | 49   | 56   | 57   |
| 13430     | Dnm2     | dynamamin 2                                                      | 110  | 111  | 114  |
| 103967    | Dnm3     | dynamamin 3                                                      | 422  | 421  | 416  |
| 13433     | Dnmt1    | DNA methyltransferase (cytosine-5) 1                             | 112  | 104  | 109  |
| 13435     | Dnmt3a   | DNA methyltransferase 3A                                         | 606  | 591  | 586  |
| 13436     | Dnmt3b   | DNA methyltransferase 3B                                         | 135  | 140  | 148  |
| 54427     | Dnmt3l   | DNA (cytosine-5-)-methyltransferase 3-like                       | 82   | 78   | 77   |
| 13437     | Dnpep    | aspartyl aminopeptidase                                          | 104  | 105  | 105  |
| 21673     | Dntt     | deoxynucleotidyltransferase, terminal                            | 105  | 104  | 112  |
| 99480     | Dnttp2   | deoxynucleotidyltransferase, terminal, interacting protein 2     | 64   | 66   | 57   |
| 67299     | Dock7    | dedicator of cytokinesis 7                                       | 206  | 207  | 206  |
| 102115    | Dohh     | deoxyhypusine hydroxylase/monooxygenase                          | 17   | 17   | 16   |
| 231134    | Dok7     | docking protein 7                                                | 79   | 79   | 80   |
| 227697    | Dolk     | dolichol kinase                                                  | 24   | 25   | 23   |
| 57170     | Dolpp1   | dolichyl pyrophosphate phosphatase 1                             | 61   | 63   | 66   |
| 208266    | Dot11    | DOT1-like, histone H3 methyltransferase ( <i>S. cerevisiae</i> ) | 71   | 77   | 69   |
| 13478     | Dpagt1   | dolichyl-phosphate (UDP-N-acetylglucosamine) acetylglucosamine   | 14   | 15   | 18   |
| 13479     | Dpep1    | dipeptidase 1 (renal)                                            | 71   | 69   | 63   |
| 319446    | Dpep2    | dipeptidase 2                                                    | 41   | 40   | 39   |
| 71854     | Dpep3    | dipeptidase 3                                                    | 41   | 35   | 43   |
| 29861     | Dpf1     | D4, zinc and double PHD fingers family 1                         | 270  | 255  | 273  |
| 19708     | Dpf2     | D4, zinc and double PHD fingers family 2                         | 40   | 39   | 38   |
| 70127     | Dpf3     | D4, zinc and double PHD fingers, family 3                        | 1322 | 1303 | 1302 |
| 116905    | Dph1     | DPH1 homolog ( <i>S. cerevisiae</i> )                            | 21   | 18   | 17   |
| 67728     | Dph2     | DPH2 homolog ( <i>S. cerevisiae</i> )                            | 31   | 36   | 32   |
| 69740     | Dph5     | DPH5 homolog ( <i>S. cerevisiae</i> )                            | 139  | 152  | 146  |
| 13480     | Dpm1     | dolichol-phosphate (beta-D) mannosyltransferase 1                | 33   | 33   | 29   |
| 13481     | Dpm2     | dolichol-phosphate (beta-D) mannosyltransferase 2                | 52   | 53   | 53   |
| 68563     | Dpm3     | dolichyl-phosphate mannosyltransferase polypeptide 3             | 29   | 36   | 32   |
| 269109    | Dpp10    | dipeptidylpeptidase 10                                           | 4921 | 4958 | 4862 |
| 75221     | Dpp3     | dipeptidylpeptidase 3                                            | 47   | 46   | 43   |
| 13482     | Dpp4     | dipeptidylpeptidase 4                                            | 551  | 550  | 547  |
| 13483     | Dpp6     | dipeptidylpeptidase 6                                            | 1865 | 1876 | 1866 |
| 83768     | Dpp7     | dipeptidylpeptidase 7                                            | 38   | 42   | 46   |
| 74388     | Dpp8     | dipeptidylpeptidase 8                                            | 105  | 103  | 96   |
| 224897    | Dpp9     | dipeptidylpeptidase 9                                            | 78   | 72   | 71   |
| 66310     | Dpy30    | dpy-30 homolog ( <i>C. elegans</i> )                             | 66   | 76   | 71   |
| 99586     | Dpyd     | dihydropyrimidine dehydrogenase                                  | 1691 | 1718 | 1671 |
| 64705     | Dpys     | dihydropyrimidinase                                              | 260  | 248  | 254  |
| 12934     | Dpysl2   | dihydropyrimidinase-like 2                                       | 301  | 298  | 304  |

|        |        |                                                                   |      |      |      |
|--------|--------|-------------------------------------------------------------------|------|------|------|
| 22240  | Dpysl3 | dihydropyrimidinase-like 3                                        | 641  | 638  | 634  |
| 26757  | Dpysl4 | dihydropyrimidinase-like 4                                        | 240  | 242  | 227  |
| 65254  | Dpysl5 | dihydropyrimidinase-like 5                                        | 182  | 195  | 195  |
| 93838  | Dqx1   | DEAQ RNA-dependent ATPase                                         | 19   | 19   | 19   |
| 13486  | Dr1    | down-regulator of transcription 1                                 | 223  | 230  | 234  |
| 71712  | Dram1  | DNA-damage regulated autophagy modulator 1                        | 233  | 238  | 233  |
| 66556  | Drap1  | Dr1 associated protein 1 (negative cofactor 2 alpha)              | 23   | 20   | 25   |
| 13488  | Drd1a  | dopamine receptor D1A                                             | 773  | 765  | 776  |
| 13489  | Drd2   | dopamine receptor D2                                              | 224  | 224  | 220  |
| 13490  | Drd3   | dopamine receptor D3                                              | 289  | 286  | 287  |
| 13491  | Drd4   | dopamine receptor D4                                              | 64   | 59   | 65   |
| 13492  | Drd5   | dopamine receptor D5                                              | 259  | 263  | 276  |
| 14000  | Drosha | drosha, ribonuclease type III                                     | 456  | 453  | 450  |
| 72107  | Dscc1  | defective in sister chromatid cohesion 1 homolog (S. cerevisiae)  | 52   | 50   | 50   |
| 212898 | Dse    | dermatan sulfate epimerase                                        | 192  | 202  | 194  |
| 109620 | Dsp    | desmoplakin                                                       | 214  | 216  | 214  |
| 213452 | Dstyk  | dual serine/threonine and tyrosine protein kinase                 | 104  | 121  | 113  |
| 66044  | Dtd1   | D-tyrosyl-tRNA deacylase 1 homolog (S. cerevisiae)                | 294  | 303  | 310  |
| 76843  | Dtl    | denticleless homolog (Drosophila)                                 | 232  | 221  | 225  |
| 209200 | Dtx3l  | deltex 3-like (Drosophila)                                        | 60   | 59   | 61   |
| 21915  | Dtymk  | deoxythymidylate kinase                                           | 62   | 65   | 60   |
| 13531  | Dub1   | deubiquitinating enzyme 1                                         | 50   | 54   | 47   |
| 381944 | Dub1a  | deubiquitinating enzyme 1a                                        | 198  | 197  | 193  |
| 384701 | Dub2a  | deubiquitinating enzyme 2a                                        | 47   | 46   | 43   |
| 99439  | Duox1  | dual oxidase 1                                                    | 71   | 70   | 75   |
| 214593 | Duox2  | dual oxidase 2                                                    | 84   | 81   | 90   |
| 435391 | Dupd1  | dual specificity phosphatase and pro isomerase domain containing  | 307  | 314  | 306  |
| 68730  | Dus1l  | dihydrouridine synthase 1-like (S. cerevisiae)                    | 51   | 49   | 47   |
| 66369  | Dus2l  | dihydrouridine synthase 2-like (SMM1, S. cerevisiae)              | 65   | 63   | 69   |
| 224907 | Dus3l  | dihydrouridine synthase 3-like (S. cerevisiae)                    | 14   | 16   | 13   |
| 71916  | Dus4l  | dihydrouridine synthase 4-like (S. cerevisiae)                    | 25   | 28   | 28   |
| 19252  | Dusp1  | dual specificity phosphatase 1                                    | 191  | 187  | 194  |
| 63953  | Dusp10 | dual specificity phosphatase 10                                   | 890  | 909  | 879  |
| 72102  | Dusp11 | dual specificity phosphatase 11 (RNA/RNP complex 1-interacting)   | 129  | 124  | 134  |
| 80915  | Dusp12 | dual specificity phosphatase 12                                   | 59   | 54   | 57   |
| 27389  | Dusp13 | dual specificity phosphatase 13                                   | 55   | 53   | 55   |
| 56405  | Dusp14 | dual specificity phosphatase 14                                   | 226  | 214  | 219  |
| 252864 | Dusp15 | dual specificity phosphatase-like 15                              | 38   | 31   | 37   |
| 70686  | Dusp16 | dual specificity phosphatase 16                                   | 239  | 241  | 234  |
| 75219  | Dusp18 | dual specificity phosphatase 18                                   | 22   | 28   | 23   |
| 68082  | Dusp19 | dual specificity phosphatase 19                                   | 61   | 64   | 64   |
| 13537  | Dusp2  | dual specificity phosphatase 2                                    | 87   | 88   | 89   |
| 73547  | Dusp21 | dual specificity phosphatase 21                                   | 699  | 723  | 691  |
| 105352 | Dusp22 | dual specificity phosphatase 22                                   | 258  | 252  | 263  |
| 68440  | Dusp23 | dual specificity phosphatase 23                                   | 120  | 122  | 129  |
| 66959  | Dusp26 | dual specificity phosphatase 26 (putative)                        | 2401 | 2410 | 2395 |
| 240892 | Dusp27 | dual specificity phosphatase 27 (putative)                        | 169  | 172  | 159  |
| 67446  | Dusp28 | dual specificity phosphatase 28                                   | 9    | 9    | 9    |
| 72349  | Dusp3  | dual specificity phosphatase 3 (vaccinia virus phosphatase VH1-re | 26   | 26   | 24   |
| 319520 | Dusp4  | dual specificity phosphatase 4                                    | 1032 | 1034 | 1053 |
| 240672 | Dusp5  | dual specificity phosphatase 5                                    | 177  | 169  | 171  |
| 67603  | Dusp6  | dual specificity phosphatase 6                                    | 637  | 648  | 642  |
| 235584 | Dusp7  | dual specificity phosphatase 7                                    | 179  | 180  | 186  |
| 18218  | Dusp8  | dual specificity phosphatase 8                                    | 152  | 144  | 139  |
| 75590  | Dusp9  | dual specificity phosphatase 9                                    | 196  | 190  | 197  |

|        |          |                                                                   |      |      |      |
|--------|----------|-------------------------------------------------------------------|------|------|------|
| 13542  | Dvl1     | dishevelled, dsh homolog 1 (Drosophila)                           | 27   | 24   | 29   |
| 13543  | Dvl2     | dishevelled 2, dsh homolog (Drosophila)                           | 16   | 18   | 22   |
| 13544  | Dvl3     | dishevelled 3, dsh homolog (Drosophila)                           | 44   | 42   | 44   |
| 235661 | Dync1li1 | dynein cytoplasmic 1 light intermediate chain 1                   | 126  | 115  | 121  |
| 110350 | Dync2h1  | dynein cytoplasmic 2 heavy chain 1                                | 1174 | 1201 | 1124 |
| 56455  | Dynll1   | dynein light chain LC8-type 1                                     | 64   | 64   | 59   |
| 13548  | Dyrk1a   | dual-specificity tyrosine-(Y)-phosphorylation regulated kinase 1a | 440  | 424  | 415  |
| 13549  | Dyrk1b   | dual-specificity tyrosine-(Y)-phosphorylation regulated kinase 1b | 119  | 123  | 129  |
| 69181  | Dyrk2    | dual-specificity tyrosine-(Y)-phosphorylation regulated kinase 2  | 1028 | 1043 | 1024 |
| 226419 | Dyrk3    | dual-specificity tyrosine-(Y)-phosphorylation regulated kinase 3  | 73   | 72   | 75   |
| 101320 | Dyrk4    | dual-specificity tyrosine-(Y)-phosphorylation regulated kinase 4  | 113  | 113  | 114  |
| 224170 | Dzip3    | DAZ interacting protein 3, zinc finger                            | 158  | 161  | 136  |
| 13555  | E2f1     | E2F transcription factor 1                                        | 67   | 57   | 63   |
| 242705 | E2f2     | E2F transcription factor 2                                        | 85   | 85   | 81   |
| 13557  | E2f3     | E2F transcription factor 3                                        | 362  | 351  | 355  |
| 104394 | E2f4     | E2F transcription factor 4                                        | 12   | 12   | 11   |
| 13559  | E2f5     | E2F transcription factor 5                                        | 92   | 100  | 90   |
| 50496  | E2f6     | E2F transcription factor 6                                        | 123  | 122  | 126  |
| 52679  | E2f7     | E2F transcription factor 7                                        | 413  | 417  | 411  |
| 108961 | E2f8     | E2F transcription factor 8                                        | 137  | 143  | 132  |
| 13560  | E4f1     | E4F transcription factor 1                                        | 37   | 37   | 37   |
| 74427  | Eaf1     | ELL associated factor 1                                           | 110  | 106  | 102  |
| 106389 | Eaf2     | ELL associated factor 2                                           | 148  | 144  | 148  |
| 66266  | Eapp     | E2F-associated phosphoprotein                                     | 178  | 182  | 179  |
| 93725  | Ear10    | eosinophil-associated, ribonuclease A family, member 10           | 181  | 185  | 176  |
| 93726  | Ear11    | eosinophil-associated, ribonuclease A family, member 11           | 284  | 273  | 262  |
| 503845 | Ear12    | eosinophil-associated, ribonuclease A family, member 12           | 1    | 1    | 1    |
| 503847 | Ear14    | eosinophil-associated, ribonuclease A family, member 14           | 67   | 71   | 66   |
| 13587  | Ear2     | eosinophil-associated, ribonuclease A family, member 2            | 130  | 132  | 130  |
| 53876  | Ear3     | eosinophil-associated, ribonuclease A family, member 3            | 87   | 89   | 82   |
| 53877  | Ear4     | eosinophil-associated, ribonuclease A family, member 4            | 10   | 11   | 10   |
| 93719  | Ear6     | eosinophil-associated, ribonuclease A family, member 6            | 76   | 76   | 70   |
| 53873  | Ear7     | eosinophil-associated, ribonuclease A family, member 7            | 44   | 43   | 41   |
| 67417  | Ears2    | glutamyl-tRNA synthetase 2 (mitochondrial)(putative)              | 61   | 64   | 62   |
| 13591  | Ebf1     | early B-cell factor 1                                             | 1706 | 1714 | 1721 |
| 13592  | Ebf2     | early B-cell factor 2                                             | 315  | 313  | 301  |
| 13593  | Ebf3     | early B-cell factor 3                                             | 667  | 674  | 674  |
| 228598 | Ebf4     | early B-cell factor 4                                             | 137  | 134  | 141  |
| 69072  | Ebna1bp2 | EBNA1 binding protein 2                                           | 8    | 7    | 7    |
| 13595  | Ebp      | phenylalkylamine Ca2+ antagonist (emopamil) binding protein       | 40   | 37   | 38   |
| 68177  | Ebpl     | emopamil binding protein-like                                     | 172  | 173  | 161  |
| 70601  | Ecd      | ecdysoneless homolog (Drosophila)                                 | 70   | 69   | 73   |
| 230857 | Ece1     | endothelin converting enzyme 1                                    | 246  | 240  | 243  |
| 107522 | Ece2     | endothelin converting enzyme 2                                    | 53   | 49   | 55   |
| 13599  | Ecel1    | endothelin converting enzyme-like 1                               | 71   | 75   | 79   |
| 51798  | Ech1     | enoyl coenzyme A hydratase 1, peroxisomal                         | 34   | 28   | 31   |
| 52665  | Echdc1   | enoyl Coenzyme A hydratase domain containing 1                    | 199  | 196  | 194  |
| 52430  | Echdc2   | enoyl Coenzyme A hydratase domain containing 2                    | 129  | 128  | 131  |
| 67856  | Echdc3   | enoyl Coenzyme A hydratase domain containing 3                    | 244  | 244  | 253  |
| 93747  | Echs1    | enoyl Coenzyme A hydratase, short chain, 1, mitochondrial         | 31   | 33   | 28   |
| 13177  | Eci1     | enoyl-Coenzyme A delta isomerase 1                                | 33   | 37   | 36   |
| 23986  | Eci2     | enoyl-Coenzyme A delta isomerase 2                                | 890  | 913  | 913  |
| 13607  | Eda      | ectodysplasin-A                                                   | 661  | 658  | 640  |
| 192193 | Edem1    | ER degradation enhancer, mannosidase alpha-like 1                 | 2364 | 2364 | 2377 |
| 66967  | Edem3    | ER degradation enhancer, mannosidase alpha-like 3                 | 679  | 650  | 667  |

|        |         |                                                                        |      |      |      |
|--------|---------|------------------------------------------------------------------------|------|------|------|
| 59022  | Edf1    | endothelial differentiation-related factor 1                           | 31   | 29   | 26   |
| 13614  | Edn1    | endothelin 1                                                           | 801  | 814  | 820  |
| 13615  | Edn2    | endothelin 2                                                           | 586  | 608  | 599  |
| 13617  | Ednra   | endothelin receptor type A                                             | 768  | 761  | 769  |
| 13618  | Ednrb   | endothelin receptor type B                                             | 1008 | 1043 | 1015 |
| 13626  | Eed     | embryonic ectoderm development                                         | 122  | 119  | 114  |
| 13627  | Eef1a1  | eukaryotic translation elongation factor 1 alpha 1                     | 181  | 184  | 185  |
| 13628  | Eef1a2  | eukaryotic translation elongation factor 1 alpha 2                     | 63   | 64   | 66   |
| 55949  | Eef1b2  | eukaryotic translation elongation factor 1 beta 2                      | 2    | 2    | 2    |
| 66656  | Eef1d   | eukaryotic translation elongation factor 1 delta (guanine nucleotide   | 20   | 17   | 16   |
| 66143  | Eef1e1  | eukaryotic translation elongation factor 1 epsilon 1                   | 428  | 415  | 416  |
| 67160  | Eef1g   | eukaryotic translation elongation factor 1 gamma                       | 46   | 47   | 46   |
| 13629  | Eef2    | eukaryotic translation elongation factor 2                             | 15   | 13   | 13   |
| 13631  | Eef2k   | eukaryotic elongation factor-2 kinase                                  | 228  | 221  | 216  |
| 65967  | Eefsec  | eukaryotic elongation factor, selenocysteine-tRNA-specific             | 315  | 317  | 312  |
| 67484  | Eepd1   | endonuclease/exonuclease/phosphatase family domain containing          | 1895 | 1924 | 1912 |
| 77627  | Efcab6  | EF-hand calcium binding domain 6                                       | 616  | 584  | 594  |
| 216616 | Efemp1  | epidermal growth factor-containing fibulin-like extracellular matrix p | 469  | 476  | 458  |
| 13636  | Efna1   | ephrin A1                                                              | 72   | 68   | 69   |
| 13640  | Efna5   | ephrin A5                                                              | 5581 | 5695 | 5558 |
| 101592 | Eftud1  | elongation factor Tu GTP binding domain containing 1                   | 287  | 279  | 282  |
| 20624  | Eftud2  | elongation factor Tu GTP binding domain containing 2                   | 61   | 58   | 55   |
| 13645  | Egf     | epidermal growth factor                                                | 343  | 346  | 358  |
| 268780 | Egflam  | EGF-like, fibronectin type III and laminin G domains                   | 859  | 856  | 842  |
| 13649  | Egfr    | epidermal growth factor receptor                                       | 564  | 571  | 558  |
| 112405 | Egln1   | EGL nine homolog 1 (C. elegans)                                        | 155  | 145  | 143  |
| 112406 | Egln2   | EGL nine homolog 2 (C. elegans)                                        | 28   | 24   | 26   |
| 112407 | Egln3   | EGL nine homolog 3 (C. elegans)                                        | 1474 | 1467 | 1465 |
| 13653  | Egr1    | early growth response 1                                                | 121  | 110  | 109  |
| 13654  | Egr2    | early growth response 2                                                | 327  | 332  | 320  |
| 13655  | Egr3    | early growth response 3                                                | 335  | 322  | 330  |
| 13656  | Egr4    | early growth response 4                                                | 104  | 106  | 108  |
| 98878  | Ehd4    | EH-domain containing 4                                                 | 285  | 267  | 269  |
| 13661  | Ehf     | ets homologous factor                                                  | 454  | 444  | 438  |
| 74147  | Ehhadh  | enoyl-Coenzyme A, hydratase/3-hydroxyacyl Coenzyme A dehydr            | 128  | 123  | 123  |
| 77683  | Ehmt1   | euchromatic histone methyltransferase 1                                | 224  | 218  | 222  |
| 110147 | Ehmt2   | euchromatic histone lysine N-methyltransferase 2                       | 20   | 20   | 21   |
| 13663  | Ei24    | etoposide induced 2.4 mRNA                                             | 104  | 106  | 97   |
| 58521  | Eid1    | EP300 interacting inhibitor of differentiation 1                       | 122  | 128  | 129  |
| 386655 | Eid2    | EP300 interacting inhibitor of differentiation 2                       | 121  | 128  | 121  |
| 66341  | Eid3    | EP300 interacting inhibitor of differentiation 3                       | 123  | 124  | 130  |
| 20918  | Eif1    | eukaryotic translation initiation factor 1                             | 76   | 77   | 84   |
| 13664  | Eif1a   | eukaryotic translation initiation factor 1A                            | 170  | 178  | 176  |
| 69860  | Eif1ad  | eukaryotic translation initiation factor 1A domain containing          | 29   | 27   | 25   |
| 66235  | Eif1ax  | eukaryotic translation initiation factor 1A, X-linked                  | 188  | 186  | 185  |
| 68969  | Eif1b   | eukaryotic translation initiation factor 1B                            | 291  | 304  | 301  |
| 229317 | Eif2a   | eukaryotic translation initiation factor 2A                            | 142  | 140  | 143  |
| 15467  | Eif2ak1 | eukaryotic translation initiation factor 2 alpha kinase 1              | 82   | 81   | 90   |
| 19106  | Eif2ak2 | eukaryotic translation initiation factor 2-alpha kinase 2              | 67   | 69   | 66   |
| 13666  | Eif2ak3 | eukaryotic translation initiation factor 2 alpha kinase 3              | 176  | 164  | 168  |
| 27103  | Eif2ak4 | eukaryotic translation initiation factor 2 alpha kinase 4              | 138  | 135  | 134  |
| 209354 | Eif2b1  | eukaryotic translation initiation factor 2B, subunit 1 (alpha)         | 36   | 38   | 32   |
| 217715 | Eif2b2  | eukaryotic translation initiation factor 2B, subunit 2 beta            | 126  | 116  | 112  |
| 108067 | Eif2b3  | eukaryotic translation initiation factor 2B, subunit 3                 | 134  | 136  | 135  |
| 13667  | Eif2b4  | eukaryotic translation initiation factor 2B, subunit 4 delta           | 16   | 15   | 15   |

|        |           |                                                                               |      |      |      |
|--------|-----------|-------------------------------------------------------------------------------|------|------|------|
| 224045 | Eif2b5    | eukaryotic translation initiation factor 2B, subunit 5 epsilon                | 125  | 112  | 121  |
| 236511 | Eif2c1    | eukaryotic translation initiation factor 2C, 1                                | 127  | 135  | 129  |
| 239528 | Eif2c2    | eukaryotic translation initiation factor 2C, 2                                | 417  | 426  | 435  |
| 214150 | Eif2c3    | eukaryotic translation initiation factor 2C, 3                                | 176  | 187  | 185  |
| 76850  | Eif2c4    | eukaryotic translation initiation factor 2C, 4                                | 114  | 116  | 118  |
| 16865  | Eif2d     | eukaryotic translation initiation factor 2D                                   | 138  | 138  | 143  |
| 13665  | Eif2s1    | eukaryotic translation initiation factor 2, subunit 1 alpha                   | 63   | 60   | 52   |
| 67204  | Eif2s2    | eukaryotic translation initiation factor 2, subunit 2 (beta)                  | 290  | 274  | 281  |
| 26905  | Eif2s3x   | eukaryotic translation initiation factor 2, subunit 3, structural gene $\chi$ | 139  | 140  | 144  |
| 26908  | Eif2s3y   | eukaryotic translation initiation factor 2, subunit 3, structural gene $\psi$ | 196  | 190  | 186  |
| 13669  | Eif3a     | eukaryotic translation initiation factor 3, subunit A                         | 48   | 47   | 43   |
| 27979  | Eif3b     | eukaryotic translation initiation factor 3, subunit B                         | 152  | 148  | 157  |
| 56347  | Eif3c     | eukaryotic translation initiation factor 3, subunit C                         | 105  | 98   | 111  |
| 55944  | Eif3d     | eukaryotic translation initiation factor 3, subunit D                         | 206  | 202  | 203  |
| 16341  | Eif3e     | eukaryotic translation initiation factor 3, subunit E                         | 366  | 383  | 391  |
| 66085  | Eif3f     | eukaryotic translation initiation factor 3, subunit F                         | 94   | 102  | 98   |
| 53356  | Eif3g     | eukaryotic translation initiation factor 3, subunit G                         | 81   | 90   | 76   |
| 68135  | Eif3h     | eukaryotic translation initiation factor 3, subunit H                         | 1267 | 1282 | 1256 |
| 54709  | Eif3i     | eukaryotic translation initiation factor 3, subunit I                         | 26   | 29   | 28   |
| 78655  | Eif3j     | eukaryotic translation initiation factor 3, subunit J                         | 213  | 210  | 210  |
| 73830  | Eif3k     | eukaryotic translation initiation factor 3, subunit K                         | 23   | 23   | 28   |
| 223691 | Eif3l     | eukaryotic translation initiation factor 3, subunit L                         | 59   | 56   | 64   |
| 98221  | Eif3m     | eukaryotic translation initiation factor 3, subunit M                         | 319  | 304  | 298  |
| 13681  | Eif4a1    | eukaryotic translation initiation factor 4A1                                  | 18   | 17   | 18   |
| 13682  | Eif4a2    | eukaryotic translation initiation factor 4A2                                  | 60   | 62   | 59   |
| 192170 | Eif4a3    | eukaryotic translation initiation factor 4A3                                  | 59   | 62   | 58   |
| 75705  | Eif4b     | eukaryotic translation initiation factor 4B                                   | 89   | 94   | 104  |
| 13684  | Eif4e     | eukaryotic translation initiation factor 4E                                   | 49   | 51   | 49   |
| 218268 | Eif4e1b   | eukaryotic translation initiation factor 4E family member 1B                  | 30   | 28   | 27   |
| 26987  | Eif4e2    | eukaryotic translation initiation factor 4E member 2                          | 81   | 77   | 70   |
| 66892  | Eif4e3    | eukaryotic translation initiation factor 4E member 3                          | 322  | 322  | 326  |
| 13685  | Eif4ebp1  | eukaryotic translation initiation factor 4E binding protein 1                 | 86   | 85   | 85   |
| 13688  | Eif4ebp2  | eukaryotic translation initiation factor 4E binding protein 2                 | 78   | 73   | 73   |
| 108112 | Eif4ebp3  | eukaryotic translation initiation factor 4E binding protein 3                 | 146  | 148  | 140  |
| 74203  | Eif4enif1 | eukaryotic translation initiation factor 4E nuclear import factor 1           | 93   | 97   | 92   |
| 208643 | Eif4g1    | eukaryotic translation initiation factor 4, gamma 1                           | 40   | 38   | 36   |
| 13690  | Eif4g2    | eukaryotic translation initiation factor 4, gamma 2                           | 123  | 123  | 119  |
| 230861 | Eif4g3    | eukaryotic translation initiation factor 4 gamma, 3                           | 467  | 449  | 464  |
| 22384  | Eif4h     | eukaryotic translation initiation factor 4H                                   | 94   | 88   | 90   |
| 217869 | Eif5      | eukaryotic translation initiation factor 5                                    | 68   | 69   | 68   |
| 276770 | Eif5a     | eukaryotic translation initiation factor 5A                                   | 31   | 26   | 29   |
| 208691 | Eif5a2    | eukaryotic translation initiation factor 5A2                                  | 131  | 138  | 131  |
| 226982 | Eif5b     | eukaryotic translation initiation factor 5B                                   | 173  | 170  | 160  |
| 16418  | Eif6      | eukaryotic translation initiation factor 6                                    | 22   | 21   | 19   |
| 114615 | Elac1     | elaC homolog 1 (E. coli)                                                      | 137  | 149  | 141  |
| 68626  | Elac2     | elaC homolog 2 (E. coli)                                                      | 964  | 970  | 938  |
| 50701  | Elane     | elastase, neutrophil expressed                                                | 14   | 12   | 14   |
| 15568  | Elavl1    | ELAV (embryonic lethal, abnormal vision, Drosophila)-like 1 (Hu ar)           | 63   | 63   | 65   |
| 13709  | Elf1      | E74-like factor 1                                                             | 38   | 39   | 40   |
| 69257  | Elf2      | E74-like factor 2                                                             | 224  | 215  | 227  |
| 13710  | Elf3      | E74-like factor 3                                                             | 148  | 143  | 141  |
| 56501  | Elf4      | E74-like factor 4 (ets domain transcription factor)                           | 213  | 196  | 206  |
| 13711  | Elf5      | E74-like factor 5                                                             | 243  | 258  | 254  |
| 13712  | Elk1      | ELK1, member of ETS oncogene family                                           | 36   | 36   | 31   |
| 13713  | Elk3      | ELK3, member of ETS oncogene family                                           | 223  | 212  | 228  |

|        |        |                                                                    |     |     |     |
|--------|--------|--------------------------------------------------------------------|-----|-----|-----|
| 13716  | EII    | elongation factor RNA polymerase II                                | 84  | 91  | 85  |
| 192657 | EII2   | elongation factor RNA polymerase II 2                              | 256 | 251 | 242 |
| 269344 | EII3   | elongation factor RNA polymerase II-like 3                         | 49  | 48  | 46  |
| 66126  | Elof1  | elongation factor 1 homolog (ELF1, <i>S. cerevisiae</i> )          | 37  | 40  | 38  |
| 54325  | Elovl1 | elongation of very long chain fatty acids (FEN1/Elo2, SUR4/Elo3, y | 36  | 34  | 34  |
| 54326  | Elovl2 | elongation of very long chain fatty acids (FEN1/Elo2, SUR4/Elo3, y | 173 | 181 | 179 |
| 12686  | Elovl3 | elongation of very long chain fatty acids (FEN1/Elo2, SUR4/Elo3, y | 92  | 90  | 86  |
| 83603  | Elovl4 | elongation of very long chain fatty acids (FEN1/Elo2, SUR4/Elo3, y | 381 | 364 | 370 |
| 68801  | Elovl5 | ELOVL family member 5, elongation of long chain fatty acids (yeas  | 386 | 377 | 379 |
| 170439 | Elovl6 | ELOVL family member 6, elongation of long chain fatty acids (yeas  | 422 | 436 | 430 |
| 74559  | Elovl7 | ELOVL family member 7, elongation of long chain fatty acids (yeas  | 200 | 209 | 190 |
| 58523  | Elp2   | elongation protein 2 homolog ( <i>S. cerevisiae</i> )              | 70  | 66  | 65  |
| 74195  | Elp3   | elongation protein 3 homolog ( <i>S. cerevisiae</i> )              | 233 | 227 | 226 |
| 77766  | Elp4   | elongation protein 4 homolog ( <i>S. cerevisiae</i> )              | 273 | 289 | 277 |
| 268465 | Eme1   | essential meiotic endonuclease 1 homolog 1 ( <i>S. pombe</i> )     | 30  | 33  | 32  |
| 193838 | Eme2   | essential meiotic endonuclease 1 homolog 2 ( <i>S. pombe</i> )     | 11  | 9   | 10  |
| 14791  | Emg1   | EMG1 nucleolar protein homolog ( <i>S. cerevisiae</i> )            | 67  | 65  | 67  |
| 225898 | Eml3   | echinoderm microtubule associated protein like 3                   | 17  | 15  | 16  |
| 13798  | En1    | engrailed 1                                                        | 742 | 743 | 749 |
| 13799  | En2    | engrailed 2                                                        | 206 | 211 | 214 |
| 13804  | Endog  | endonuclease G                                                     | 57  | 54  | 56  |
| 19011  | Endou  | endonuclease, polyU-specific                                       | 93  | 101 | 92  |
| 13805  | Eng    | endoglin                                                           | 85  | 81  | 79  |
| 217364 | Engase | endo-beta-N-acetylglucosaminidase                                  | 581 | 595 | 567 |
| 13806  | Eno1   | enolase 1, alpha non-neuron                                        | 45  | 46  | 48  |
| 13807  | Eno2   | enolase 2, gamma neuronal                                          | 29  | 29  | 28  |
| 13808  | Eno3   | enolase 3, beta muscle                                             | 20  | 15  | 21  |
| 226265 | Eno4   | enolase 4                                                          | 221 | 215 | 219 |
| 67870  | Enoph1 | enolase-phosphatase 1                                              | 156 | 159 | 165 |
| 239188 | Enox1  | ecto-NOX disulfide-thiol exchanger 1                               | 608 | 620 | 594 |
| 209224 | Enox2  | ecto-NOX disulfide-thiol exchanger 2                               | 714 | 721 | 675 |
| 13809  | Enpep  | glutamyl aminopeptidase                                            | 285 | 285 | 284 |
| 18605  | Enpp1  | ectonucleotide pyrophosphatase/phosphodiesterase 1                 | 309 | 304 | 318 |
| 18606  | Enpp2  | ectonucleotide pyrophosphatase/phosphodiesterase 2                 | 414 | 414 | 404 |
| 209558 | Enpp3  | ectonucleotide pyrophosphatase/phosphodiesterase 3                 | 197 | 204 | 204 |
| 224794 | Enpp4  | ectonucleotide pyrophosphatase/phosphodiesterase 4                 | 139 | 144 | 137 |
| 83965  | Enpp5  | ectonucleotide pyrophosphatase/phosphodiesterase 5                 | 200 | 197 | 200 |
| 320981 | Enpp6  | ectonucleotide pyrophosphatase/phosphodiesterase 6                 | 697 | 702 | 700 |
| 238011 | Enpp7  | ectonucleotide pyrophosphatase/phosphodiesterase 7                 | 140 | 139 | 145 |
| 12495  | Entpd1 | ectonucleoside triphosphate diphosphohydrolase 1                   | 286 | 288 | 275 |
| 12496  | Entpd2 | ectonucleoside triphosphate diphosphohydrolase 2                   | 40  | 36  | 41  |
| 215446 | Entpd3 | ectonucleoside triphosphate diphosphohydrolase 3                   | 103 | 105 | 102 |
| 67464  | Entpd4 | ectonucleoside triphosphate diphosphohydrolase 4                   | 122 | 129 | 128 |
| 12499  | Entpd5 | ectonucleoside triphosphate diphosphohydrolase 5                   | 63  | 61  | 62  |
| 93685  | Entpd7 | ectonucleoside triphosphate diphosphohydrolase 7                   | 91  | 91  | 93  |
| 72090  | Entpd8 | ectonucleoside triphosphate diphosphohydrolase 8                   | 54  | 52  | 55  |
| 223527 | Eny2   | enhancer of yellow 2 homolog ( <i>Drosophila</i> )                 | 283 | 296 | 296 |
| 13813  | Eomes  | eomesodermin homolog ( <i>Xenopus laevis</i> )                     | 465 | 458 | 459 |
| 328572 | Ep300  | E1A binding protein p300                                           | 254 | 266 | 266 |
| 75560  | Ep400  | E1A binding protein p400                                           | 171 | 161 | 173 |
| 13819  | Epas1  | endothelial PAS domain protein 1                                   | 967 | 945 | 952 |
| 13828  | Epb4.2 | erythrocyte protein band 4.2                                       | 93  | 99  | 97  |
| 13831  | Epc1   | enhancer of polycomb homolog 1 ( <i>Drosophila</i> )               | 178 | 177 | 181 |
| 227867 | Epc2   | enhancer of polycomb homolog 2 ( <i>Drosophila</i> )               | 854 | 863 | 845 |
| 71920  | Epgn   | epithelial mitogen                                                 | 197 | 191 | 182 |

|        |        |                                                                      |      |      |      |
|--------|--------|----------------------------------------------------------------------|------|------|------|
| 13835  | Epha1  | Eph receptor A1                                                      | 61   | 63   | 66   |
| 230735 | Epha10 | Eph receptor A10                                                     | 96   | 91   | 94   |
| 13836  | Epha2  | Eph receptor A2                                                      | 158  | 154  | 158  |
| 13837  | Epha3  | Eph receptor A3                                                      | 2001 | 2062 | 2006 |
| 13838  | Epha4  | Eph receptor A4                                                      | 2210 | 2196 | 2151 |
| 13839  | Epha5  | Eph receptor A5                                                      | 3292 | 3388 | 3259 |
| 13840  | Epha6  | Eph receptor A6                                                      | 3848 | 3934 | 3805 |
| 13841  | Epha7  | Eph receptor A7                                                      | 7126 | 7274 | 7122 |
| 13842  | Epha8  | Eph receptor A8                                                      | 189  | 179  | 188  |
| 270190 | Ephb1  | Eph receptor B1                                                      | 1613 | 1592 | 1609 |
| 13844  | Ephb2  | Eph receptor B2                                                      | 352  | 354  | 353  |
| 13845  | Ephb3  | Eph receptor B3                                                      | 344  | 339  | 338  |
| 13846  | Ephb4  | Eph receptor B4                                                      | 191  | 182  | 182  |
| 13848  | Ephb6  | Eph receptor B6                                                      | 152  | 144  | 150  |
| 13849  | Ephx1  | epoxide hydrolase 1, microsomal                                      | 140  | 146  | 139  |
| 13850  | Ephx2  | epoxide hydrolase 2, cytoplasmic                                     | 77   | 81   | 79   |
| 13853  | Epm2a  | epilepsy, progressive myoclonic epilepsy, type 2 gene alpha          | 1979 | 2063 | 1976 |
| 13856  | Epo    | erythropoietin                                                       | 29   | 29   | 26   |
| 107508 | Eprs   | glutamyl-prolyl-tRNA synthetase                                      | 143  | 142  | 142  |
| 28042  | Ept1   | ethanolaminophosphotransferase 1 (CDP-ethanolamine-specific)         | 106  | 95   | 99   |
| 13861  | Epx    | eosinophil peroxidase                                                | 44   | 47   | 42   |
| 80898  | Erap1  | endoplasmic reticulum aminopeptidase 1                               | 402  | 402  | 403  |
| 353283 | Eras   | ES cell-expressed Ras                                                | 35   | 32   | 33   |
| 13866  | Erbb2  | v-erb-b2 erythroblastic leukemia viral oncogene homolog 2, neuro/    | 48   | 47   | 44   |
| 13867  | Erbb3  | v-erb-b2 erythroblastic leukemia viral oncogene homolog 3 (avian)    | 78   | 78   | 85   |
| 13869  | Erbb4  | v-erb-a erythroblastic leukemia viral oncogene homolog 4 (avian)     | 3212 | 3251 | 3131 |
| 111173 | Erc1   | ELKS/RAB6-interacting/CAST family member 1                           | 377  | 373  | 375  |
| 13870  | Ercc1  | excision repair cross-complementing rodent repair deficiency, com    | 57   | 60   | 60   |
| 13871  | Ercc2  | excision repair cross-complementing rodent repair deficiency, com    | 31   | 30   | 28   |
| 13872  | Ercc3  | excision repair cross-complementing rodent repair deficiency, com    | 285  | 270  | 280  |
| 50505  | Ercc4  | excision repair cross-complementing rodent repair deficiency, com    | 1636 | 1637 | 1634 |
| 22592  | Ercc5  | excision repair cross-complementing rodent repair deficiency, com    | 120  | 123  | 125  |
| 319955 | Ercc6  | excision repair cross-complementing rodent repair deficiency, com    | 177  | 180  | 175  |
| 71991  | Ercc8  | excision repair cross-complementing rodent repair deficiency, comple | 68   | 75   | 71   |
| 13874  | Ereg   | epiregulin                                                           | 147  | 144  | 145  |
| 13875  | Erf    | Ets2 repressor factor                                                | 48   | 48   | 45   |
| 13876  | Erg    | avian erythroblastosis virus E-26 (v-ets) oncogene related           | 558  | 561  | 551  |
| 67276  | Eri1   | exoribonuclease 1                                                    | 272  | 268  | 276  |
| 66753  | Erlec1 | endoplasmic reticulum lectin 1                                       | 86   | 90   | 90   |
| 226144 | Erlin1 | ER lipid raft associated 1                                           | 100  | 95   | 96   |
| 244373 | Erlin2 | ER lipid raft associated 2                                           | 89   | 78   | 87   |
| 226090 | Ermp1  | endoplasmic reticulum metalloproteinase 1                            | 226  | 227  | 224  |
| 78943  | Ern1   | endoplasmic reticulum (ER) to nucleus signalling 1                   | 162  | 164  | 159  |
| 26918  | Ern2   | endoplasmic reticulum (ER) to nucleus signalling 2                   | 79   | 76   | 86   |
| 50527  | Ero1l  | ERO1-like (S. cerevisiae)                                            | 153  | 141  | 136  |
| 67475  | Ero1lb | ERO1-like beta (S. cerevisiae)                                       | 168  | 161  | 175  |
| 76299  | Erp44  | endoplasmic reticulum protein 44                                     | 188  | 197  | 194  |
| 74155  | Errfi1 | ERBB receptor feedback inhibitor 1                                   | 326  | 320  | 320  |
| 77805  | Esco1  | establishment of cohesion 1 homolog 1 (S. cerevisiae)                | 382  | 387  | 375  |
| 71988  | Esco2  | establishment of cohesion 1 homolog 2 (S. cerevisiae)                | 42   | 41   | 42   |
| 13885  | Esd    | esterase D/formylglutathione hydrolase                               | 404  | 403  | 382  |
| 66580  | Esf1   | ESF1, nucleolar pre-rRNA processing protein, homolog (S. cerevis)    | 130  | 131  | 124  |
| 105988 | Espl1  | extra spindle poles-like 1 (S. cerevisiae)                           | 61   | 65   | 59   |
| 13982  | Esr1   | estrogen receptor 1 (alpha)                                          | 717  | 717  | 715  |
| 13983  | Esr2   | estrogen receptor 2 (beta)                                           | 562  | 548  | 545  |

|        |         |                                                         |      |      |      |
|--------|---------|---------------------------------------------------------|------|------|------|
| 207920 | Esrp1   | epithelial splicing regulatory protein 1                | 212  | 212  | 206  |
| 77411  | Esrp2   | epithelial splicing regulatory protein 2                | 114  | 115  | 126  |
| 26379  | Esrra   | estrogen related receptor, alpha                        | 16   | 16   | 19   |
| 26380  | Esrrb   | estrogen related receptor, beta                         | 672  | 644  | 661  |
| 26381  | Esrrg   | estrogen-related receptor gamma                         | 1018 | 1029 | 1030 |
| 225363 | Etf1    | eukaryotic translation termination factor 1             | 124  | 126  | 114  |
| 110842 | Etfa    | electron transferring flavoprotein, alpha polypeptide   | 280  | 279  | 275  |
| 110826 | Etfb    | electron transferring flavoprotein, beta polypeptide    | 57   | 62   | 60   |
| 66841  | Etfdh   | electron transferring flavoprotein, dehydrogenase       | 47   | 52   | 46   |
| 75320  | Etnk1   | ethanolamine kinase 1                                   | 193  | 194  | 193  |
| 214253 | Etnk2   | ethanolamine kinase 2                                   | 93   | 85   | 86   |
| 23871  | Ets1    | E26 avian leukemia oncogene 1, 5' domain                | 2457 | 2486 | 2442 |
| 23872  | Ets2    | E26 avian leukemia oncogene 2, 3' domain                | 592  | 600  | 576  |
| 14009  | Etv1    | ets variant gene 1                                      | 2702 | 2740 | 2697 |
| 14008  | Etv2    | ets variant gene 2                                      | 29   | 28   | 30   |
| 27049  | Etv3    | ets variant gene 3                                      | 228  | 231  | 238  |
| 18612  | Etv4    | ets variant gene 4 (E1A enhancer binding protein, E1AF) | 225  | 208  | 209  |
| 104156 | Etv5    | ets variant gene 5                                      | 496  | 525  | 504  |
| 14011  | Etv6    | ets variant gene 6 (TEL oncogene)                       | 708  | 699  | 694  |
| 14027  | Evpl    | envoplakin                                              | 69   | 72   | 79   |
| 14028  | Evx1    | even skipped homeotic gene 1 homolog                    | 478  | 471  | 482  |
| 14030  | Ewsr1   | Ewing sarcoma breakpoint region 1                       | 41   | 47   | 39   |
| 241624 | Exd1    | exonuclease 3'-5' domain containing 1                   | 102  | 92   | 97   |
| 26909  | Exo1    | exonuclease 1                                           | 361  | 353  | 360  |
| 66583  | Exosc1  | exosome component 1                                     | 26   | 25   | 27   |
| 50912  | Exosc10 | exosome component 10                                    | 114  | 116  | 108  |
| 227715 | Exosc2  | exosome component 2                                     | 64   | 63   | 60   |
| 66362  | Exosc3  | exosome component 3                                     | 58   | 57   | 60   |
| 109075 | Exosc4  | exosome component 4                                     | 26   | 26   | 28   |
| 27998  | Exosc5  | exosome component 5                                     | 18   | 20   | 21   |
| 72544  | Exosc6  | exosome component 6                                     | 61   | 57   | 60   |
| 69639  | Exosc8  | exosome component 8                                     | 52   | 51   | 56   |
| 50911  | Exosc9  | exosome component 9                                     | 123  | 130  | 125  |
| 14042  | Ext1    | exostoses (multiple) 1                                  | 1517 | 1537 | 1495 |
| 14043  | Ext2    | exostoses (multiple) 2                                  | 266  | 254  | 259  |
| 58193  | Extl2   | exostoses (multiple)-like 2                             | 160  | 160  | 157  |
| 14048  | Eya1    | eyes absent 1 homolog (Drosophila)                      | 1226 | 1231 | 1231 |
| 14049  | Eya2    | eyes absent 2 homolog (Drosophila)                      | 481  | 499  | 484  |
| 14050  | Eya3    | eyes absent 3 homolog (Drosophila)                      | 218  | 220  | 217  |
| 14051  | Eya4    | eyes absent 4 homolog (Drosophila)                      | 1239 | 1239 | 1201 |
| 14055  | Ezh1    | enhancer of zeste homolog 1 (Drosophila)                | 92   | 88   | 97   |
| 14056  | Ezh2    | enhancer of zeste homolog 2 (Drosophila)                | 251  | 259  | 259  |
| 14058  | F10     | coagulation factor X                                    | 46   | 45   | 45   |
| 109821 | F11     | coagulation factor XI                                   | 284  | 287  | 287  |
| 58992  | F12     | coagulation factor XII (Hageman factor)                 | 36   | 40   | 41   |
| 74145  | F13a1   | coagulation factor XIII, A1 subunit                     | 808  | 789  | 774  |
| 14061  | F2      | coagulation factor II                                   | 71   | 63   | 68   |
| 14062  | F2r     | coagulation factor II (thrombin) receptor               | 221  | 226  | 213  |
| 14063  | F2r1    | coagulation factor II (thrombin) receptor-like 1        | 191  | 173  | 173  |
| 14066  | F3      | coagulation factor III                                  | 230  | 216  | 220  |
| 14068  | F7      | coagulation factor VII                                  | 114  | 108  | 114  |
| 14069  | F8      | coagulation factor VIII                                 | 264  | 267  | 239  |
| 14071  | F9      | coagulation factor IX                                   | 1216 | 1223 | 1184 |
| 338521 | Fa2h    | fatty acid 2-hydroxylase                                | 244  | 241  | 240  |
| 14073  | Faah    | fatty acid amide hydrolase                              | 150  | 151  | 142  |

|        |         |                                                    |     |     |     |
|--------|---------|----------------------------------------------------|-----|-----|-----|
| 14079  | Fabp2   | fatty acid binding protein 2, intestinal           | 255 | 257 | 258 |
| 14077  | Fabp3   | fatty acid binding protein 3, muscle and heart     | 111 | 113 | 106 |
| 11770  | Fabp4   | fatty acid binding protein 4, adipocyte            | 134 | 136 | 137 |
| 16592  | Fabp5   | fatty acid binding protein 5, epidermal            | 442 | 456 | 435 |
| 16204  | Fabp6   | fatty acid binding protein 6, ileal (gastrotropin) | 203 | 189 | 205 |
| 14082  | Fadd    | Fas (TNFRSF6)-associated via death domain          | 230 | 238 | 234 |
| 76267  | Fads1   | fatty acid desaturase 1                            | 123 | 134 | 131 |
| 56473  | Fads2   | fatty acid desaturase 2                            | 180 | 181 | 186 |
| 60527  | Fads3   | fatty acid desaturase 3                            | 103 | 104 | 109 |
| 328035 | Fads6   | fatty acid desaturase domain family, member 6      | 40  | 42  | 41  |
| 14085  | Fah     | fumarylacetoacetate hydrolase                      | 352 | 351 | 347 |
| 68636  | Fahd1   | fumarylacetoacetate hydrolase domain containing 1  | 62  | 61  | 60  |
| 68126  | Fahd2a  | fumarylacetoacetate hydrolase domain containing 2A | 74  | 76  | 74  |
| 231717 | Fam109a | family with sequence similarity 109, member A      | 254 | 254 | 252 |
| 338368 | Fam109b | family with sequence similarity 109, member B      | 6   | 7   | 9   |
| 107373 | Fam111a | family with sequence similarity 111, member A      | 117 | 126 | 119 |
| 67544  | Fam120b | family with sequence similarity 120, member B      | 149 | 154 | 159 |
| 63913  | Fam129a | family with sequence similarity 129, member A      | 336 | 335 | 336 |
| 70681  | Fam175a | family with sequence similarity 175, member A      | 62  | 60  | 66  |
| 215015 | Fam20b  | family with sequence similarity 20, member B       | 212 | 217 | 218 |
| 330554 | Fan1    | FANCD2/FANCI-associated nuclease 1                 | 139 | 141 | 136 |
| 14087  | Fanca   | Fanconi anemia, complementation group A            | 101 | 98  | 100 |
| 237211 | Fancc   | Fanconi anemia, complementation group B            | 428 | 413 | 396 |
| 14088  | Fancc   | Fanconi anemia, complementation group C            | 359 | 344 | 339 |
| 211651 | Fancc2  | Fanconi anemia, complementation group D2           | 91  | 94  | 91  |
| 60534  | Fancg   | Fanconi anemia, complementation group G            | 34  | 35  | 33  |
| 208836 | Fanci   | Fanconi anemia, complementation group I            | 108 | 114 | 114 |
| 67030  | Fancl   | Fanconi anemia, complementation group L            | 465 | 477 | 469 |
| 104806 | Fancm   | Fanconi anemia, complementation group M            | 130 | 133 | 127 |
| 14089  | Fap     | fibroblast activation protein                      | 204 | 206 | 207 |
| 67420  | Far1    | fatty acyl CoA reductase 1                         | 483 | 489 | 489 |
| 330450 | Far2    | fatty acyl CoA reductase 2                         | 678 | 672 | 652 |
| 69955  | Fars2   | phenylalanine-tRNA synthetase 2 (mitochondrial)    | 802 | 806 | 778 |
| 66590  | Farsa   | phenylalanyl-tRNA synthetase, alpha subunit        | 35  | 36  | 30  |
| 23874  | Farsb   | phenylalanyl-tRNA synthetase, beta subunit         | 257 | 256 | 264 |
| 14102  | Fas     | Fas (TNF receptor superfamily member 6)            | 279 | 278 | 277 |
| 14104  | Fasn    | fatty acid synthase                                | 174 | 167 | 170 |
| 66587  | Fastk   | Fas-activated serine/threonine kinase              | 25  | 28  | 26  |
| 320720 | Fastkd1 | FAST kinase domains 1                              | 71  | 66  | 63  |
| 75619  | Fastkd2 | FAST kinase domains 2                              | 288 | 298 | 294 |
| 69577  | Fastkd3 | FAST kinase domains 3                              | 20  | 22  | 20  |
| 380601 | Fastkd5 | FAST kinase domains 5                              | 13  | 13  | 14  |
| 14113  | Fbl     | fibrillarin                                        | 64  | 60  | 67  |
| 14121  | Fbp1    | fructose biphosphatase 1                           | 214 | 215 | 204 |
| 14120  | Fbp2    | fructose biphosphatase 2                           | 166 | 170 | 171 |
| 30843  | Fbxl12  | F-box and leucine-rich repeat protein 12           | 57  | 56  | 54  |
| 101358 | Fbxl14  | F-box and leucine-rich repeat protein 14           | 167 | 162 | 160 |
| 68431  | Fbxl15  | F-box and leucine-rich repeat protein 15           | 13  | 14  | 10  |
| 50789  | Fbxl3   | F-box and leucine-rich repeat protein 3            | 340 | 351 | 335 |
| 242960 | Fbxl5   | F-box and leucine-rich repeat protein 5            | 203 | 190 | 192 |
| 225055 | Fbxo11  | F-box protein 11                                   | 198 | 210 | 189 |
| 50764  | Fbxo15  | F-box protein 15                                   | 138 | 135 | 135 |
| 50760  | Fbxo17  | F-box protein 17                                   | 60  | 60  | 64  |
| 230904 | Fbxo2   | F-box protein 2                                    | 173 | 162 | 151 |
| 71999  | Fbxo22  | F-box protein 22                                   | 166 | 177 | 177 |

|        |         |                                                              |      |      |      |
|--------|---------|--------------------------------------------------------------|------|------|------|
| 66822  | Fbxo25  | F-box protein 25                                             | 114  | 105  | 106  |
| 233040 | Fbxo27  | F-box protein 27                                             | 114  | 117  | 115  |
| 71865  | Fbxo30  | F-box protein 30                                             | 238  | 249  | 243  |
| 76454  | Fbxo31  | F-box protein 31                                             | 60   | 62   | 57   |
| 106052 | Fbxo4   | F-box protein 4                                              | 529  | 520  | 508  |
| 207215 | Fbxo40  | F-box protein 40                                             | 102  | 99   | 103  |
| 230903 | Fbxo44  | F-box protein 44                                             | 7    | 9    | 7    |
| 268882 | Fbxo45  | F-box protein 45                                             | 87   | 82   | 82   |
| 67141  | Fbxo5   | F-box protein 5                                              | 241  | 226  | 236  |
| 50762  | Fbxo6   | F-box protein 6                                              | 24   | 25   | 25   |
| 50753  | Fbxo8   | F-box protein 8                                              | 980  | 965  | 965  |
| 103583 | Fbxw11  | F-box and WD-40 domain protein 11                            | 382  | 376  | 361  |
| 50754  | Fbxw7   | F-box and WD-40 domain protein 7                             | 558  | 560  | 558  |
| 231672 | Fbxw8   | F-box and WD-40 domain protein 8                             | 183  | 190  | 173  |
| 14125  | Fcer1a  | Fc receptor, IgE, high affinity I, alpha polypeptide         | 68   | 69   | 69   |
| 14128  | Fcer2a  | Fc receptor, IgE, low affinity II, alpha polypeptide         | 52   | 58   | 58   |
| 73736  | Fcf1    | FCF1 small subunit (SSU) processome component homolog (S. ce | 33   | 32   | 33   |
| 14131  | Fcgr3   | Fc receptor, IgG, low affinity III                           | 118  | 117  | 114  |
| 14134  | Fcnb    | ficolin B                                                    | 309  | 295  | 308  |
| 14137  | Fdft1   | farnesyl diphosphate farnesyl transferase 1                  | 90   | 91   | 93   |
| 110196 | Fdps    | farnesyl diphosphate synthetase                              | 30   | 32   | 33   |
| 14148  | Fdx1    | ferredoxin 1                                                 | 226  | 225  | 217  |
| 68165  | Fdx1l   | ferredoxin 1-like                                            | 32   | 32   | 29   |
| 382137 | Fdxacb1 | ferredoxin-fold anticodon binding domain containing 1        | 8    | 7    | 9    |
| 14149  | Fdxr    | ferredoxin reductase                                         | 34   | 37   | 36   |
| 14151  | Fech    | ferrochelatase                                               | 233  | 217  | 216  |
| 14155  | Fem1b   | feminization 1 homolog b (C. elegans)                        | 211  | 206  | 207  |
| 14156  | Fen1    | flap structure specific endonuclease 1                       | 29   | 27   | 30   |
| 114712 | Ferd3l  | Fer3-like (Drosophila)                                       | 660  | 672  | 658  |
| 14158  | Fert2   | fer (fms/fps related) protein kinase, testis specific 2      | 1093 | 1105 | 1088 |
| 14159  | Fes     | feline sarcoma oncogene                                      | 39   | 36   | 37   |
| 260298 | Fev     | FEV (ETS oncogene family)                                    | 47   | 48   | 46   |
| 73191  | Fezf1   | Fez family zinc finger 1                                     | 673  | 675  | 664  |
| 54713  | Fezf2   | Fez family zinc finger 2                                     | 682  | 699  | 693  |
| 224014 | Fgd4    | FYVE, RhoGEF and PH domain containing 4                      | 470  | 477  | 458  |
| 14164  | Fgf1    | fibroblast growth factor 1                                   | 129  | 130  | 134  |
| 14165  | Fgf10   | fibroblast growth factor 10                                  | 1276 | 1324 | 1272 |
| 14168  | Fgf13   | fibroblast growth factor 13                                  | 1076 | 1099 | 1066 |
| 14170  | Fgf15   | fibroblast growth factor 15                                  | 69   | 69   | 72   |
| 14173  | Fgf2    | fibroblast growth factor 2                                   | 136  | 143  | 138  |
| 64654  | Fgf23   | fibroblast growth factor 23                                  | 115  | 116  | 116  |
| 14175  | Fgf4    | fibroblast growth factor 4                                   | 68   | 74   | 71   |
| 14178  | Fgf7    | fibroblast growth factor 7                                   | 369  | 376  | 366  |
| 14179  | Fgf8    | fibroblast growth factor 8                                   | 115  | 110  | 104  |
| 14180  | Fgf9    | fibroblast growth factor 9                                   | 1456 | 1468 | 1458 |
| 14182  | Fgfr1   | fibroblast growth factor receptor 1                          | 506  | 515  | 515  |
| 14183  | Fgfr2   | fibroblast growth factor receptor 2                          | 1243 | 1206 | 1230 |
| 14184  | Fgfr3   | fibroblast growth factor receptor 3                          | 145  | 152  | 157  |
| 14186  | Fgfr4   | fibroblast growth factor receptor 4                          | 126  | 130  | 132  |
| 116701 | Fgfrl1  | fibroblast growth factor receptor-like 1                     | 153  | 156  | 142  |
| 75578  | Fggy    | FGGY carbohydrate kinase domain containing                   | 1187 | 1200 | 1190 |
| 14191  | Fgr     | Gardner-Rasheed feline sarcoma viral (Fgr) oncogene homolog  | 121  | 113  | 114  |
| 14194  | Fh1     | fumarate hydratase 1                                         | 180  | 173  | 175  |
| 14198  | Fhit    | fragile histidine triad gene                                 | 2157 | 2171 | 2131 |
| 14200  | Fhl2    | four and a half LIM domains 2                                | 443  | 445  | 432  |

|        |        |                                                                |      |      |      |
|--------|--------|----------------------------------------------------------------|------|------|------|
| 57756  | Fhl5   | four and a half LIM domains 5                                  | 401  | 395  | 376  |
| 234686 | Fhod1  | formin homology 2 domain containing 1                          | 28   | 24   | 27   |
| 231630 | Ficd   | FIC domain containing                                          | 61   | 57   | 61   |
| 103199 | Fig4   | FIG4 homolog (S. cerevisiae)                                   | 501  | 480  | 495  |
| 26910  | Figla  | folliculogenesis specific basic helix-loop-helix               | 156  | 146  | 147  |
| 66899  | Fip1l1 | FIP1 like 1 (S. cerevisiae)                                    | 183  | 190  | 177  |
| 23877  | Fiz1   | Flt3 interacting zinc finger protein 1                         | 26   | 24   | 22   |
| 14230  | Fkbp10 | FK506 binding protein 10                                       | 37   | 33   | 36   |
| 66120  | Fkbp11 | FK506 binding protein 11                                       | 73   | 73   | 71   |
| 231997 | Fkbp14 | FK506 binding protein 14                                       | 38   | 38   | 36   |
| 338355 | Fkbp15 | FK506 binding protein 15                                       | 97   | 93   | 96   |
| 14225  | Fkbp1a | FK506 binding protein 1a                                       | 104  | 99   | 104  |
| 14226  | Fkbp1b | FK506 binding protein 1b                                       | 29   | 30   | 32   |
| 14227  | Fkbp2  | FK506 binding protein 2                                        | 13   | 12   | 14   |
| 30795  | Fkbp3  | FK506 binding protein 3                                        | 51   | 50   | 45   |
| 14228  | Fkbp4  | FK506 binding protein 4                                        | 16   | 15   | 18   |
| 14229  | Fkbp5  | FK506 binding protein 5                                        | 214  | 220  | 225  |
| 94244  | Fkbp6  | FK506 binding protein 6                                        | 138  | 131  | 126  |
| 14231  | Fkbp7  | FK506 binding protein 7                                        | 33   | 39   | 35   |
| 14232  | Fkbp8  | FK506 binding protein 8                                        | 18   | 19   | 18   |
| 27055  | Fkbp9  | FK506 binding protein 9                                        | 160  | 161  | 156  |
| 56299  | Fkbp1  | FK506 binding protein-like                                     | 22   | 22   | 22   |
| 243853 | Fkrp   | fukutin related protein                                        | 31   | 35   | 33   |
| 319945 | Flad1  | RFad1, flavin adenine dinucleotide synthetase, homolog (yeast) | 23   | 19   | 19   |
| 14247  | Fli1   | Friend leukemia integration 1                                  | 392  | 381  | 391  |
| 14248  | Flii   | flightless I homolog (Drosophila)                              | 38   | 35   | 34   |
| 192176 | Flna   | filamin, alpha                                                 | 90   | 87   | 94   |
| 14254  | Flt1   | FMS-like tyrosine kinase 1                                     | 543  | 569  | 558  |
| 14255  | Flt3   | FMS-like tyrosine kinase 3                                     | 122  | 133  | 124  |
| 14257  | Flt4   | FMS-like tyrosine kinase 4                                     | 126  | 126  | 132  |
| 14260  | Fmn1   | formin 1                                                       | 620  | 614  | 611  |
| 14261  | Fmo1   | flavin containing monooxygenase 1                              | 111  | 113  | 112  |
| 55990  | Fmo2   | flavin containing monooxygenase 2                              | 91   | 91   | 83   |
| 14262  | Fmo3   | flavin containing monooxygenase 3                              | 196  | 185  | 192  |
| 226564 | Fmo4   | flavin containing monooxygenase 4                              | 166  | 153  | 153  |
| 14263  | Fmo5   | flavin containing monooxygenase 5                              | 60   | 63   | 62   |
| 240894 | Fmo9   | flavin containing monooxygenase 9                              | 459  | 449  | 448  |
| 14265  | Fmr1   | fragile X mental retardation syndrome 1 homolog                | 92   | 95   | 83   |
| 14268  | Fn1    | fibronectin 1                                                  | 439  | 432  | 446  |
| 63828  | Fn3k   | fructosamine 3 kinase                                          | 44   | 42   | 41   |
| 238024 | Fn3krp | fructosamine 3 kinase related protein                          | 66   | 62   | 66   |
| 68655  | Fndc1  | fibronectin type III domain containing 1                       | 678  | 685  | 676  |
| 329679 | Fnip2  | folliculin interacting protein 2                               | 313  | 320  | 317  |
| 14272  | Fnta   | farnesyltransferase, CAAX box, alpha                           | 152  | 165  | 156  |
| 110606 | Fntb   | farnesyltransferase, CAAX box, beta                            | 183  | 186  | 189  |
| 53320  | Folh1  | folate hydrolase                                               | 136  | 134  | 125  |
| 14275  | Folr1  | folate receptor 1 (adult)                                      | 52   | 52   | 55   |
| 14281  | Fos    | FBJ osteosarcoma oncogene                                      | 286  | 277  | 290  |
| 14282  | Fosb   | FBJ osteosarcoma oncogene B                                    | 66   | 61   | 59   |
| 14284  | Fosl2  | fos-like antigen 2                                             | 692  | 694  | 688  |
| 15375  | Foxa1  | forkhead box A1                                                | 419  | 411  | 402  |
| 15376  | Foxa2  | forkhead box A2                                                | 1317 | 1344 | 1339 |
| 15377  | Foxa3  | forkhead box A3                                                | 28   | 25   | 28   |
| 64290  | Foxb1  | forkhead box B1                                                | 692  | 706  | 682  |
| 14240  | Foxb2  | forkhead box B2                                                | 240  | 218  | 213  |

|        |         |                                                  |      |      |      |
|--------|---------|--------------------------------------------------|------|------|------|
| 17300  | Foxc1   | forkhead box C1                                  | 906  | 939  | 908  |
| 14234  | Foxc2   | forkhead box C2                                  | 19   | 19   | 17   |
| 15229  | Foxd1   | forkhead box D1                                  | 387  | 415  | 402  |
| 17301  | Foxd2   | forkhead box D2                                  | 106  | 116  | 104  |
| 15221  | Foxd3   | forkhead box D3                                  | 673  | 675  | 659  |
| 14237  | Foxd4   | forkhead box D4                                  | 109  | 103  | 103  |
| 110805 | Foxe1   | forkhead box E1                                  | 240  | 245  | 239  |
| 30923  | Foxe3   | forkhead box E3                                  | 98   | 93   | 97   |
| 15227  | Foxf1a  | forkhead box F1a                                 | 464  | 451  | 457  |
| 14238  | Foxf2   | forkhead box F2                                  | 284  | 281  | 281  |
| 15228  | Foxg1   | forkhead box G1                                  | 3217 | 3258 | 3182 |
| 14106  | Foxh1   | forkhead box H1                                  | 14   | 11   | 12   |
| 14233  | Foxi1   | forkhead box I1                                  | 364  | 360  | 341  |
| 270004 | Foxi2   | forkhead box I2                                  | 342  | 345  | 324  |
| 232077 | Foxi3   | forkhead box I3                                  | 286  | 295  | 291  |
| 15223  | Foxj1   | forkhead box J1                                  | 132  | 126  | 140  |
| 60611  | Foxj2   | forkhead box J2                                  | 149  | 146  | 150  |
| 230700 | Foxj3   | forkhead box J3                                  | 125  | 126  | 118  |
| 17425  | Foxk1   | forkhead box K1                                  | 1578 | 1591 | 1554 |
| 68837  | Foxk2   | forkhead box K2                                  | 152  | 161  | 154  |
| 14241  | Foxl1   | forkhead box L1                                  | 524  | 543  | 534  |
| 26927  | Foxl2   | forkhead box L2                                  | 38   | 35   | 35   |
| 14235  | Foxm1   | forkhead box M1                                  | 14   | 15   | 16   |
| 15218  | Foxn1   | forkhead box N1                                  | 67   | 69   | 57   |
| 14236  | Foxn2   | forkhead box N2                                  | 527  | 527  | 527  |
| 71375  | Foxn3   | forkhead box N3                                  | 1226 | 1227 | 1254 |
| 116810 | Foxn4   | forkhead box N4                                  | 188  | 188  | 181  |
| 56458  | Foxo1   | forkhead box O1                                  | 800  | 819  | 817  |
| 56484  | Foxo3   | forkhead box O3                                  | 597  | 591  | 565  |
| 54601  | Foxo4   | forkhead box O4                                  | 52   | 46   | 46   |
| 329934 | Foxo6   | forkhead box O6                                  | 302  | 299  | 301  |
| 108655 | Foxp1   | forkhead box P1                                  | 2201 | 2255 | 2212 |
| 114142 | Foxp2   | forkhead box P2                                  | 1538 | 1564 | 1531 |
| 20371  | Foxp3   | forkhead box P3                                  | 39   | 38   | 43   |
| 74123  | Foxp4   | forkhead box P4                                  | 336  | 322  | 336  |
| 15220  | Foxq1   | forkhead box Q1                                  | 781  | 779  | 769  |
| 382074 | Foxr1   | forkhead box R1                                  | 50   | 49   | 49   |
| 436240 | Foxr2   | forkhead box R2                                  | 122  | 119  | 115  |
| 235169 | Foxred1 | FAD-dependent oxidoreductase domain containing 1 | 13   | 12   | 13   |
| 239554 | Foxred2 | FAD-dependent oxidoreductase domain containing 2 | 52   | 54   | 53   |
| 14239  | Foxs1   | forkhead box S1                                  | 50   | 48   | 50   |
| 14287  | Fpgs    | folylpolyglutamyl synthetase                     | 83   | 77   | 80   |
| 75540  | Fpgt    | fucose-1-phosphate guanylyltransferase           | 46   | 48   | 47   |
| 14300  | Frg1    | FSHD region gene 1                               | 918  | 927  | 876  |
| 14302  | Frk     | fyn-related kinase                               | 2611 | 2634 | 2566 |
| 20321  | Frrs1   | ferric-chelate reductase 1                       | 212  | 209  | 211  |
| 327826 | Frs2    | fibroblast growth factor receptor substrate 2    | 216  | 212  | 213  |
| 623046 | Fscb    | fibrous sheath CABYR binding protein             | 4209 | 4286 | 4173 |
| 14309  | Fshr    | follicle stimulating hormone receptor            | 2894 | 2943 | 2900 |
| 14313  | Fst     | follistatin                                      | 530  | 549  | 530  |
| 83554  | Fstl3   | follistatin-like 3                               | 26   | 22   | 24   |
| 14317  | Ftcd    | formiminotransferase cyclodeaminase              | 76   | 67   | 72   |
| 14319  | Fth1    | ferritin heavy chain 1                           | 132  | 126  | 133  |
| 67634  | Ftmt    | ferritin mitochondrial                           | 1677 | 1712 | 1667 |
| 26383  | Fto     | fat mass and obesity associated                  | 646  | 602  | 627  |

|        |         |                                                             |      |      |      |
|--------|---------|-------------------------------------------------------------|------|------|------|
| 68017  | Ftsj2   | FtsJ homolog 2 (E. coli)                                    | 12   | 15   | 16   |
| 56095  | Ftsj3   | FtsJ homolog 3 (E. coli)                                    | 50   | 50   | 49   |
| 234728 | Ftsjd1  | FtsJ methyltransferase domain containing 1                  | 139  | 126  | 133  |
| 74157  | Ftsjd2  | FtsJ methyltransferase domain containing 2                  | 142  | 130  | 135  |
| 51886  | Fubp1   | far upstream element (FUZE) binding protein 1               | 70   | 70   | 67   |
| 320267 | Fubp3   | far upstream element (FUZE) binding protein 3               | 227  | 228  | 205  |
| 71665  | Fuca1   | fucosidase, alpha-L- 1, tissue                              | 61   | 68   | 64   |
| 66848  | Fuca2   | fucosidase, alpha-L- 2, plasma                              | 103  | 98   | 105  |
| 234730 | Fuk     | fucokinase                                                  | 100  | 90   | 91   |
| 18550  | Furin   | furin (paired basic amino acid cleaving enzyme)             | 197  | 192  | 185  |
| 14343  | Fut1    | fucosyltransferase 1                                        | 8    | 8    | 9    |
| 171167 | Fut10   | fucosyltransferase 10                                       | 944  | 942  | 942  |
| 73068  | Fut11   | fucosyltransferase 11                                       | 34   | 37   | 36   |
| 14344  | Fut2    | fucosyltransferase 2                                        | 53   | 52   | 46   |
| 14345  | Fut4    | fucosyltransferase 4                                        | 36   | 37   | 38   |
| 14347  | Fut7    | fucosyltransferase 7                                        | 37   | 34   | 32   |
| 53618  | Fut8    | fucosyltransferase 8                                        | 1619 | 1641 | 1622 |
| 14348  | Fut9    | fucosyltransferase 9                                        | 1335 | 1360 | 1330 |
| 14297  | Fxn     | frataxin                                                    | 334  | 338  | 330  |
| 14359  | Fxr1    | fragile X mental retardation gene 1, autosomal homolog      | 314  | 307  | 304  |
| 14360  | Fyn     | Fyn proto-oncogene                                          | 581  | 586  | 561  |
| 14362  | Fzd1    | frizzled homolog 1 (Drosophila)                             | 1482 | 1510 | 1507 |
| 57265  | Fzd2    | frizzled homolog 2 (Drosophila)                             | 91   | 92   | 91   |
| 14366  | Fzd4    | frizzled homolog 4 (Drosophila)                             | 228  | 225  | 235  |
| 14367  | Fzd5    | frizzled homolog 5 (Drosophila)                             | 351  | 330  | 345  |
| 14369  | Fzd7    | frizzled homolog 7 (Drosophila)                             | 326  | 323  | 341  |
| 14370  | Fzd8    | frizzled homolog 8 (Drosophila)                             | 1817 | 1822 | 1799 |
| 56371  | Fzr1    | fizzy/cell division cycle 20 related 1 (Drosophila)         | 21   | 20   | 26   |
| 217558 | G2e3    | G2/M-phase specific E3 ubiquitin ligase                     | 934  | 941  | 915  |
| 14377  | G6pc    | glucose-6-phosphatase, catalytic                            | 115  | 113  | 115  |
| 14378  | G6pc2   | glucose-6-phosphatase, catalytic, 2                         | 177  | 180  | 172  |
| 68401  | G6pc3   | glucose 6 phosphatase, catalytic, 3                         | 50   | 53   | 56   |
| 14380  | G6pd2   | glucose-6-phosphate dehydrogenase 2                         | 6231 | 6317 | 6149 |
| 14381  | G6pdx   | glucose-6-phosphate dehydrogenase X-linked                  | 5    | 4    | 4    |
| 14387  | Gaa     | glucosidase, alpha, acid                                    | 94   | 93   | 84   |
| 14388  | Gab1    | growth factor receptor bound protein 2-associated protein 1 | 363  | 354  | 351  |
| 54393  | Gabbr1  | gamma-aminobutyric acid (GABA) B receptor, 1                | 78   | 79   | 74   |
| 14390  | Gabpa   | GA repeat binding protein, alpha                            | 4    | 4    | 5    |
| 14391  | Gabpb1  | GA repeat binding protein, beta 1                           | 112  | 117  | 110  |
| 213054 | Gabpb2  | GA repeat binding protein, beta 2                           | 80   | 84   | 85   |
| 14415  | Gad1    | glutamic acid decarboxylase 1                               | 192  | 196  | 192  |
| 14417  | Gad2    | glutamic acid decarboxylase 2                               | 495  | 474  | 481  |
| 17873  | Gadd45b | growth arrest and DNA-damage-inducible 45 beta              | 105  | 85   | 99   |
| 23882  | Gadd45g | growth arrest and DNA-damage-inducible 45 gamma             | 936  | 951  | 956  |
| 73748  | Gadl1   | glutamate decarboxylase-like 1                              | 1092 | 1102 | 1133 |
| 231580 | Gak     | cyclin G associated kinase                                  | 98   | 95   | 100  |
| 53897  | Gal3st1 | galactose-3-O-sulfotransferase 1                            | 93   | 102  | 92   |
| 545276 | Gal3st3 | galactose-3-O-sulfotransferase 3                            | 51   | 48   | 49   |
| 330217 | Gal3st4 | galactose-3-O-sulfotransferase 4                            | 18   | 18   | 17   |
| 14420  | Galc    | galactosylceramidase                                        | 2829 | 2853 | 2827 |
| 74246  | Gale    | galactose-4-epimerase, UDP                                  | 31   | 28   | 31   |
| 14635  | Galk1   | galactokinase 1                                             | 58   | 59   | 63   |
| 69976  | Galk2   | galactokinase 2                                             | 220  | 225  | 227  |
| 319625 | Galm    | galactose mutarotase                                        | 198  | 196  | 192  |
| 50917  | Galns   | galactosamine (N-acetyl)-6-sulfate sulfatase                | 47   | 46   | 50   |

|        |         |                                                                     |      |      |      |
|--------|---------|---------------------------------------------------------------------|------|------|------|
| 14423  | Galnt1  | UDP-N-acetyl-alpha-D-galactosamine:polypeptide N-acetylgalacto:     | 389  | 388  | 404  |
| 171212 | Galnt10 | UDP-N-acetyl-alpha-D-galactosamine:polypeptide N-acetylgalacto:     | 375  | 364  | 366  |
| 271786 | Galnt13 | UDP-N-acetyl-alpha-D-galactosamine:polypeptide N-acetylgalacto:     | 1679 | 1698 | 1684 |
| 108148 | Galnt2  | UDP-N-acetyl-alpha-D-galactosamine:polypeptide N-acetylgalacto:     | 525  | 530  | 513  |
| 14425  | Galnt3  | UDP-N-acetyl-alpha-D-galactosamine:polypeptide N-acetylgalacto:     | 515  | 522  | 516  |
| 207839 | Galnt6  | UDP-N-acetyl-alpha-D-galactosamine:polypeptide N-acetylgalacto:     | 101  | 108  | 106  |
| 108150 | Galnt7  | UDP-N-acetyl-alpha-D-galactosamine: polypeptide N-acetylgalacto     | 1508 | 1540 | 1492 |
| 270049 | Galnt16 | UDP-N-acetyl-alpha-D-galactosamine:polypeptide N-acetylgalacto:     | 248  | 272  | 255  |
| 14428  | Galr2   | galanin receptor 2                                                  | 43   | 44   | 45   |
| 14429  | Galr3   | galanin receptor 3                                                  | 39   | 38   | 39   |
| 14430  | Galt    | galactose-1-phosphate uridyl transferase                            | 25   | 26   | 23   |
| 14431  | Gamt    | guanidinoacetate methyltransferase                                  | 21   | 21   | 19   |
| 14376  | Ganab   | alpha glucosidase 2 alpha neutral subunit                           | 32   | 34   | 33   |
| 76051  | Ganc    | glucosidase, alpha; neutral C                                       | 67   | 70   | 65   |
| 14433  | Gapdh   | glyceraldehyde-3-phosphate dehydrogenase                            | 53   | 47   | 53   |
| 14447  | Gapdhs  | glyceraldehyde-3-phosphate dehydrogenase, spermatogenic             | 27   | 25   | 30   |
| 68147  | Gar1    | GAR1 ribonucleoprotein homolog (yeast)                              | 15   | 20   | 17   |
| 353172 | Gars    | glycyl-tRNA synthetase                                              | 194  | 190  | 171  |
| 14450  | Gart    | phosphoribosylglycinamide formyltransferase                         | 35   | 39   | 35   |
| 78926  | Gas2l1  | growth arrest-specific 2 like 1                                     | 50   | 49   | 49   |
| 14460  | Gata1   | GATA binding protein 1                                              | 91   | 85   | 82   |
| 14461  | Gata2   | GATA binding protein 2                                              | 164  | 166  | 168  |
| 14462  | Gata3   | GATA binding protein 3                                              | 3128 | 3180 | 3124 |
| 14463  | Gata4   | GATA binding protein 4                                              | 285  | 299  | 292  |
| 14464  | Gata5   | GATA binding protein 5                                              | 127  | 136  | 130  |
| 14465  | Gata6   | GATA binding protein 6                                              | 1321 | 1334 | 1326 |
| 234366 | Gatad2a | GATA zinc finger domain containing 2A                               | 203  | 198  | 211  |
| 229542 | Gatad2b | GATA zinc finger domain containing 2B                               | 168  | 164  | 161  |
| 384281 | Gatc    | glutamyl-tRNA(Gln) amidotransferase, subunit C homolog (bacteri     | 19   | 17   | 16   |
| 67092  | Gatm    | glycine amidinotransferase (L-arginine:glycine amidinotransferase)  | 188  | 190  | 191  |
| 14466  | Gba     | glucosidase, beta, acid                                             | 43   | 40   | 39   |
| 230101 | Gba2    | glucosidase beta 2                                                  | 8    | 6    | 5    |
| 74185  | Gbe1    | glucan (1,4-alpha-), branching enzyme 1                             | 3497 | 3557 | 3468 |
| 227671 | Gbgt1   | globoside alpha-1,3-N-acetylgalactosaminyltransferase 1             | 57   | 61   | 55   |
| 14469  | Gbp2    | guanylate binding protein 2                                         | 133  | 133  | 133  |
| 55932  | Gbp3    | guanylate binding protein 3                                         | 79   | 79   | 78   |
| 231044 | Gbx1    | gastrulation brain homeobox 1                                       | 106  | 108  | 105  |
| 14472  | Gbx2    | gastrulation brain homeobox 2                                       | 412  | 412  | 406  |
| 14473  | Gc      | group specific component                                            | 808  | 801  | 793  |
| 270076 | Gcdh    | glutaryl-Coenzyme A dehydrogenase                                   | 39   | 34   | 37   |
| 14526  | Gcg     | glucagon                                                            | 204  | 206  | 201  |
| 14528  | Gch1    | GTP cyclohydrolase 1                                                | 348  | 356  | 346  |
| 320415 | Gchfr   | GTP cyclohydrolase I feedback regulator                             | 23   | 21   | 18   |
| 103988 | Gck     | glucokinase                                                         | 78   | 73   | 80   |
| 231103 | Gckr    | glucokinase regulatory protein                                      | 205  | 206  | 211  |
| 14629  | Gclc    | glutamate-cysteine ligase, catalytic subunit                        | 355  | 362  | 357  |
| 14630  | Gclm    | glutamate-cysteine ligase, modifier subunit                         | 297  | 301  | 291  |
| 14531  | Gcm1    | glial cells missing homolog 1 (Drosophila)                          | 246  | 255  | 255  |
| 107889 | Gcm2    | glial cells missing homolog 2 (Drosophila)                          | 184  | 194  | 187  |
| 14538  | Gcnt2   | glucosaminyl (N-acetyl) transferase 2, I-branching enzyme           | 418  | 412  | 414  |
| 72077  | Gcnt3   | glucosaminyl (N-acetyl) transferase 3, mucin type                   | 173  | 165  | 165  |
| 218476 | Gcnt4   | glucosaminyl (N-acetyl) transferase 4, core 2 (beta-1,6-N-acetylglu | 480  | 465  | 464  |
| 68133  | Gcsh    | glycine cleavage system protein H (aminomethyl carrier)             | 137  | 130  | 137  |
| 56209  | Gde1    | glycerophosphodiester phosphodiesterase 1                           | 112  | 106  | 108  |
| 12165  | Gdf2    | growth differentiation factor 2                                     | 37   | 37   | 40   |

|        |        |                                                                       |      |      |      |
|--------|--------|-----------------------------------------------------------------------|------|------|------|
| 242316 | Gdf6   | growth differentiation factor 6                                       | 183  | 183  | 193  |
| 238057 | Gdf7   | growth differentiation factor 7                                       | 131  | 128  | 130  |
| 14573  | Gdnf   | glial cell line derived neurotrophic factor                           | 881  | 909  | 894  |
| 66569  | Gdpd1  | glycerophosphodiester phosphodiesterase domain containing 1           | 127  | 122  | 121  |
| 71584  | Gdpd2  | glycerophosphodiester phosphodiesterase domain containing 2           | 180  | 170  | 174  |
| 68616  | Gdpd3  | glycerophosphodiester phosphodiesterase domain containing 3           | 24   | 22   | 23   |
| 233537 | Gdpd4  | glycerophosphodiester phosphodiesterase domain containing 4           | 343  | 374  | 351  |
| 233552 | Gdpd5  | glycerophosphodiester phosphodiesterase domain containing 5           | 146  | 155  | 140  |
| 14579  | Gem    | GTP binding protein (gene overexpressed in skeletal muscle)           | 261  | 262  | 253  |
| 216766 | Gemin5 | gem (nuclear organelle) associated protein 5                          | 85   | 85   | 88   |
| 67242  | Gemin6 | gem (nuclear organelle) associated protein 6                          | 103  | 94   | 98   |
| 69731  | Gemin7 | gem (nuclear organelle) associated protein 7                          | 24   | 15   | 18   |
| 237221 | Gemin8 | gem (nuclear organelle) associated protein 8                          | 1109 | 1133 | 1097 |
| 209334 | Gen1   | Gen homolog 1, endonuclease (Drosophila)                              | 76   | 81   | 70   |
| 11692  | Gfer   | growth factor, erv1 (S. cerevisiae)-like (augmenter of liver regenera | 6    | 8    | 6    |
| 14581  | Gfi1   | growth factor independent 1                                           | 291  | 302  | 294  |
| 14582  | Gfi1b  | growth factor independent 1B                                          | 75   | 79   | 76   |
| 28030  | Gfm1   | G elongation factor, mitochondrial 1                                  | 113  | 109  | 113  |
| 320806 | Gfm2   | G elongation factor, mitochondrial 2                                  | 84   | 81   | 79   |
| 328232 | Gfod1  | glucose-fructose oxidoreductase domain containing 1                   | 256  | 265  | 256  |
| 70575  | Gfod2  | glucose-fructose oxidoreductase domain containing 2                   | 156  | 152  | 145  |
| 14583  | Gfpt1  | glutamine fructose-6-phosphate transaminase 1                         | 124  | 122  | 122  |
| 14584  | Gfpt2  | glutamine fructose-6-phosphate transaminase 2                         | 171  | 181  | 181  |
| 14586  | Gfra2  | glial cell line derived neurotrophic factor family receptor alpha 2   | 2501 | 2522 | 2491 |
| 56316  | Ggcx   | gamma-glutamyl carboxylase                                            | 63   | 63   | 59   |
| 14590  | Ggh    | gamma-glutamyl hydrolase                                              | 965  | 988  | 962  |
| 14593  | Ggps1  | geranylgeranyl diphosphate synthase 1                                 | 33   | 32   | 35   |
| 14598  | Ggt1   | gamma-glutamyltransferase 1                                           | 37   | 38   | 38   |
| 23887  | Ggt5   | gamma-glutamyltransferase 5                                           | 90   | 85   | 85   |
| 71522  | Ggt6   | gamma-glutamyltransferase 6                                           | 35   | 40   | 33   |
| 207182 | Ggt7   | gamma-glutamyltransferase 7                                           | 100  | 103  | 100  |
| 14594  | Ggta1  | glycoprotein galactosyltransferase alpha 1, 3                         | 210  | 216  | 215  |
| 14599  | Gh     | growth hormone                                                        | 49   | 44   | 45   |
| 14600  | Ghr    | growth hormone receptor                                               | 988  | 1003 | 980  |
| 14601  | Ghrh   | growth hormone releasing hormone                                      | 107  | 109  | 117  |
| 14602  | Ghrhr  | growth hormone releasing hormone receptor                             | 147  | 146  | 150  |
| 58991  | Ghrl   | ghrelin                                                               | 58   | 57   | 53   |
| 208188 | Ghsr   | growth hormone secretagogue receptor                                  | 337  | 334  | 329  |
| 14603  | Gif    | gastric intrinsic factor                                              | 94   | 97   | 102  |
| 227331 | Gigyf2 | GRB10 interacting GYF protein 2                                       | 166  | 171  | 164  |
| 317757 | Gimap5 | GTPase, IMAP family member 5                                          | 42   | 41   | 46   |
| 252876 | Gin1   | gypsy retrotransposon integrase 1                                     | 353  | 351  | 341  |
| 69270  | Gins1  | GINS complex subunit 1 (Psf1 homolog)                                 | 140  | 135  | 132  |
| 272551 | Gins2  | GINS complex subunit 2 (Psf2 homolog)                                 | 116  | 113  | 121  |
| 78833  | Gins3  | GINS complex subunit 3 (Psf3 homolog)                                 | 166  | 165  | 173  |
| 109145 | Gins4  | GINS complex subunit 4 (Sld5 homolog)                                 | 64   | 61   | 67   |
| 67903  | Gipc1  | GIPC PDZ domain containing family, member 1                           | 74   | 76   | 75   |
| 216963 | Git1   | G protein-coupled receptor kinase-interactor 1                        | 30   | 28   | 27   |
| 26431  | Git2   | G protein-coupled receptor kinase-interactor 2                        | 81   | 86   | 81   |
| 14609  | Gja1   | gap junction protein, alpha 1                                         | 1603 | 1618 | 1594 |
| 14626  | Gk2    | glycerol kinase 2                                                     | 807  | 795  | 807  |
| 235533 | Gk5    | glycerol kinase 5 (putative)                                          | 305  | 311  | 328  |
| 11605  | Gla    | galactosidase, alpha                                                  | 17   | 20   | 17   |
| 12091  | Glb1   | galactosidase, beta 1                                                 | 120  | 129  | 115  |
| 74577  | Glb11  | galactosidase, beta 1-like                                            | 23   | 25   | 22   |

|           |         |                                                 |      |      |      |
|-----------|---------|-------------------------------------------------|------|------|------|
| 244757    | Glb112  | galactosidase, beta 1-like 2                    | 134  | 129  | 135  |
| 70893     | Glb113  | galactosidase, beta 1 like 3                    | 145  | 139  | 143  |
| 93683     | Glce    | glucuronyl C5-epimerase                         | 327  | 342  | 319  |
| 104174    | Gldc    | glycine decarboxylase                           | 268  | 276  | 262  |
| 14632     | Gli1    | GLI-Kruppel family member GLI1                  | 32   | 33   | 32   |
| 14633     | Gli2    | GLI-Kruppel family member GLI2                  | 1044 | 1026 | 1032 |
| 14634     | Gli3    | GLI-Kruppel family member GLI3                  | 1733 | 1775 | 1727 |
| 230587    | Glis1   | GLIS family zinc finger 1                       | 407  | 420  | 413  |
| 83396     | Glis2   | GLIS family zinc finger 2                       | 75   | 84   | 78   |
| 226075    | Glis3   | GLIS family zinc finger 3                       | 937  | 961  | 967  |
| 170823    | Glmn    | glomulin, FKBP associated protein               | 166  | 160  | 165  |
| 109801    | Glo1    | glyoxalase 1                                    | 66   | 70   | 67   |
| 14652     | Glp1r   | glucagon-like peptide 1 receptor                | 435  | 434  | 406  |
| 93692     | Glrx    | glutaredoxin                                    | 307  | 312  | 301  |
| 69367     | Glrx2   | glutaredoxin 2 (thioltransferase)               | 95   | 97   | 88   |
| 30926     | Glrx3   | glutaredoxin 3                                  | 39   | 38   | 36   |
| 73046     | Glrx5   | glutaredoxin 5 homolog (S. cerevisiae)          | 159  | 148  | 146  |
| 14660     | Gls     | glutaminase                                     | 481  | 485  | 475  |
| 216456    | Gls2    | glutaminase 2 (liver, mitochondrial)            | 40   | 34   | 41   |
| 319804    | Glt1d1  | glycosyltransferase 1 domain containing 1       | 1106 | 1117 | 1111 |
| 234407    | Glt25d1 | glycosyltransferase 25 domain containing 1      | 96   | 87   | 88   |
| 269132    | Glt25d2 | glycosyltransferase 25 domain containing 2      | 307  | 309  | 306  |
| 71103     | Glt6d1  | glycosyltransferase 6 domain containing 1       | 63   | 60   | 63   |
| 14661     | Glud1   | glutamate dehydrogenase 1                       | 47   | 45   | 45   |
| 14645     | Glul    | glutamate-ammonia ligase (glutamine synthetase) | 395  | 405  | 396  |
| 235582    | Glyctk  | glycerate kinase                                | 21   | 22   | 22   |
| 74022     | Glyr1   | glyoxylate reductase 1 homolog (Arabidopsis)    | 49   | 44   | 47   |
| 100040233 | Gm10334 | predicted gene 10334                            | 55   | 52   | 57   |
| 100042314 | Gm10639 | predicted gene 10639                            | 106  | 107  | 111  |
| 381835    | Gm1078  | predicted gene 1078                             | 39   | 43   | 41   |
| 382064    | Gm1110  | predicted gene 1110                             | 176  | 176  | 168  |
| 242711    | Gm13011 | predicted gene 13011                            | 97   | 91   | 91   |
| 100039042 | Gm2016  | predicted gene 2016                             | 43   | 46   | 43   |
| 100039133 | Gm2058  | predicted gene 2058                             | 1839 | 1879 | 1827 |
| 100040208 | Gm2663  | predicted gene 2663                             | 93   | 94   | 95   |
| 14667     | Gm2a    | GM2 ganglioside activator protein               | 95   | 101  | 103  |
| 100041294 | Gm3258  | predicted gene 3258                             | 178  | 180  | 173  |
| 212225    | Gm4776  | sperm motility kinase W                         | 72   | 74   | 67   |
| 225058    | Gm4832  | predicted gene 4832                             | 483  | 480  | 488  |
| 226601    | Gm4846  | predicted gene 4846                             | 310  | 305  | 307  |
| 237300    | Gm4922  | predicted gene 4922                             | 113  | 112  | 113  |
| 317677    | Gm5077  | predicted gene 5077                             | 122  | 120  | 121  |
| 368203    | Gm5136  | predicted gene 5136                             | 863  | 859  | 873  |
| 384244    | Gm5294  | predicted gene 5294                             | 307  | 301  | 300  |
| 433016    | Gm5483  | predicted gene 5483                             | 67   | 74   | 73   |
| 435337    | Gm5662  | predicted gene 5662                             | 134  | 139  | 133  |
| 436523    | Gm5771  | predicted gene 5771                             | 46   | 47   | 52   |
| 239789    | Gm606   | predicted gene 606                              | 890  | 907  | 904  |
| 619597    | Gm6086  | predicted gene 6086                             | 135  | 143  | 133  |
| 622408    | Gm6320  | predicted gene 6320                             | 62   | 57   | 67   |
| 279029    | Gm711   | predicted gene 711                              | 38   | 42   | 40   |
| 635895    | Gm7168  | predicted gene 7168                             | 569  | 572  | 567  |
| 328788    | Gm749   | predicted gene 749                              | 45   | 38   | 42   |
| 332942    | Gm853   | predicted gene 853                              | 134  | 120  | 129  |
| 668137    | Gm8994  | predicted gene 8994                             | 235  | 233  | 244  |

|           |         |                                                                       |      |      |      |
|-----------|---------|-----------------------------------------------------------------------|------|------|------|
| 677156    | Gm9705  | predicted gene 9705                                                   | 158  | 155  | 161  |
| 225908    | Gm98    | predicted gene 98                                                     | 123  | 123  | 122  |
| 408192    | Gm9839  | predicted gene 9839                                                   | 465  | 465  | 461  |
| 100041596 | Gm9994  | predicted gene 9994                                                   | 173  | 172  | 170  |
| 218138    | Gmids   | GDP-mannose 4, 6-dehydratase                                          | 1228 | 1241 | 1243 |
| 56809     | Gmeb1   | glucocorticoid modulatory element binding protein 1                   | 73   | 66   | 68   |
| 229004    | Gmeb2   | glucocorticoid modulatory element binding protein 2                   | 83   | 94   | 94   |
| 57441     | Gmnn    | geminin                                                               | 218  | 216  | 214  |
| 69080     | Gmppa   | GDP-mannose pyrophosphorylase A                                       | 66   | 56   | 59   |
| 331026    | Gmppb   | GDP-mannose pyrophosphorylase B                                       | 67   | 64   | 67   |
| 66355     | Gmpr    | guanosine monophosphate reductase                                     | 754  | 753  | 751  |
| 105446    | Gmpr2   | guanosine monophosphate reductase 2                                   | 12   | 12   | 12   |
| 229363    | Gmps    | guanine monophosphate synthetase                                      | 150  | 154  | 152  |
| 14672     | Gna11   | guanine nucleotide binding protein, alpha 11                          | 37   | 35   | 39   |
| 14673     | Gna12   | guanine nucleotide binding protein, alpha 12                          | 361  | 356  | 352  |
| 14674     | Gna13   | guanine nucleotide binding protein, alpha 13                          | 18   | 23   | 20   |
| 14675     | Gna14   | guanine nucleotide binding protein, alpha 14                          | 804  | 809  | 797  |
| 14676     | Gna15   | guanine nucleotide binding protein, alpha 15                          | 56   | 56   | 55   |
| 14677     | Gnai1   | guanine nucleotide binding protein (G protein), alpha inhibiting 1    | 1575 | 1581 | 1551 |
| 14678     | Gnai2   | guanine nucleotide binding protein (G protein), alpha inhibiting 2    | 73   | 71   | 74   |
| 14679     | Gnai3   | guanine nucleotide binding protein (G protein), alpha inhibiting 3    | 79   | 79   | 80   |
| 14680     | Gnal    | guanine nucleotide binding protein, alpha stimulating, olfactory type | 511  | 493  | 486  |
| 14681     | Gnao1   | guanine nucleotide binding protein, alpha O                           | 355  | 359  | 348  |
| 14682     | Gnaq    | guanine nucleotide binding protein, alpha q polypeptide               | 231  | 230  | 226  |
| 14683     | Gnas    | GNAS (guanine nucleotide binding protein, alpha stimulating) complex  | 223  | 223  | 217  |
| 14685     | Gnat1   | guanine nucleotide binding protein, alpha transducing 1               | 48   | 52   | 52   |
| 14686     | Gnat2   | guanine nucleotide binding protein, alpha transducing 2               | 74   | 73   | 71   |
| 242851    | Gnat3   | guanine nucleotide binding protein, alpha transducing 3               | 594  | 577  | 576  |
| 14687     | Gnaz    | guanine nucleotide binding protein, alpha z subunit                   | 1514 | 1552 | 1518 |
| 14688     | Gnb1    | guanine nucleotide binding protein (G protein), beta 1                | 117  | 116  | 117  |
| 14693     | Gnb2    | guanine nucleotide binding protein (G protein), beta 2                | 40   | 41   | 41   |
| 14694     | Gnb2l1  | guanine nucleotide binding protein (G protein), beta polypeptide 2 l  | 1825 | 1827 | 1818 |
| 14695     | Gnb3    | guanine nucleotide binding protein (G protein), beta 3                | 35   | 34   | 29   |
| 14696     | Gnb4    | guanine nucleotide binding protein (G protein), beta 4                | 224  | 238  | 226  |
| 50798     | Gne     | glucosamine                                                           | 219  | 212  | 214  |
| 14702     | Gng2    | guanine nucleotide binding protein (G protein), gamma 2               | 329  | 334  | 328  |
| 14704     | Gng3    | guanine nucleotide binding protein (G protein), gamma 3               | 3    | 3    | 2    |
| 14706     | Gng4    | guanine nucleotide binding protein (G protein), gamma 4               | 460  | 480  | 449  |
| 14699     | Gngt1   | guanine nucleotide binding protein (G protein), gamma transducing     | 42   | 47   | 46   |
| 14710     | Gngt2   | guanine nucleotide binding protein (G protein), gamma transducing     | 117  | 115  | 117  |
| 14711     | Gnmt    | glycine N-methyltransferase                                           | 50   | 46   | 46   |
| 14712     | Gnpat   | glyceronephosphate O-acyltransferase                                  | 45   | 45   | 45   |
| 26384     | Gnpda1  | glucosamine-6-phosphate deaminase 1                                   | 164  | 159  | 164  |
| 67980     | Gnpda2  | glucosamine-6-phosphate deaminase 2                                   | 1644 | 1651 | 1600 |
| 54342     | Gnpnat1 | glucosamine-phosphate N-acetyltransferase 1                           | 242  | 236  | 230  |
| 432486    | Gnptab  | N-acetylglucosamine-1-phosphate transferase, alpha and beta sub       | 143  | 128  | 141  |
| 214505    | Gnptg   | N-acetylglucosamine-1-phosphotransferase, gamma subunit               | 20   | 22   | 19   |
| 75612     | Gns     | glucosamine (N-acetyl)-6-sulfatase                                    | 206  | 204  | 216  |
| 94221     | Gopc    | golgi associated PDZ and coiled-coil motif containing                 | 193  | 199  | 205  |
| 14718     | Got1    | glutamate oxaloacetate transaminase 1, soluble                        | 225  | 218  | 239  |
| 76615     | Got1l1  | glutamic-oxaloacetic transaminase 1-like 1                            | 72   | 74   | 77   |
| 14719     | Got2    | glutamate oxaloacetate transaminase 2, mitochondrial                  | 146  | 146  | 132  |
| 14731     | Gpaa1   | GPI anchor attachment protein 1                                       | 22   | 18   | 21   |
| 14732     | Gpam    | glycerol-3-phosphate acyltransferase, mitochondrial                   | 1449 | 1415 | 1432 |
| 215456    | Gpat2   | glycerol-3-phosphate acyltransferase 2, mitochondrial                 | 105  | 96   | 99   |

|        |         |                                                               |      |      |      |
|--------|---------|---------------------------------------------------------------|------|------|------|
| 73274  | Gbbp1   | GC-rich promoter binding protein 1                            | 539  | 555  | 564  |
| 77110  | Gbbp111 | GC-rich promoter binding protein 1-like 1                     | 50   | 53   | 51   |
| 14734  | Gpc3    | glypican 3                                                    | 390  | 389  | 378  |
| 74182  | Gpcpd1  | glycerophosphocholine phosphodiesterase GDE1 homolog (S. ceri | 138  | 136  | 142  |
| 14555  | Gpd1    | glycerol-3-phosphate dehydrogenase 1 (soluble)                | 29   | 33   | 30   |
| 333433 | Gpd1l   | glycerol-3-phosphate dehydrogenase 1-like                     | 300  | 294  | 299  |
| 14571  | Gpd2    | glycerol phosphate dehydrogenase 2, mitochondrial             | 1119 | 1138 | 1135 |
| 268566 | Gphn    | gephyrin                                                      | 1820 | 1860 | 1829 |
| 14751  | Gpi1    | glucose phosphate isomerase 1                                 | 114  | 111  | 110  |
| 14756  | Gpld1   | glycosylphosphatidylinositol specific phospholipase D1        | 112  | 110  | 108  |
| 14764  | Gpr44   | G protein-coupled receptor 44                                 | 37   | 36   | 38   |
| 209318 | Gps1    | G protein pathway suppressor 1                                | 15   | 15   | 15   |
| 56310  | Gps2    | G protein pathway suppressor 2                                | 22   | 23   | 24   |
| 76282  | Gpt     | glutamic pyruvic transaminase, soluble                        | 33   | 37   | 33   |
| 108682 | Gpt2    | glutamic pyruvate transaminase (alanine aminotransferase) 2   | 160  | 163  | 151  |
| 14775  | Gpx1    | glutathione peroxidase 1                                      | 50   | 58   | 55   |
| 14776  | Gpx2    | glutathione peroxidase 2                                      | 78   | 70   | 80   |
| 14778  | Gpx3    | glutathione peroxidase 3                                      | 113  | 114  | 117  |
| 625249 | Gpx4    | glutathione peroxidase 4                                      | 76   | 69   | 74   |
| 14780  | Gpx5    | glutathione peroxidase 5                                      | 171  | 163  | 169  |
| 75512  | Gpx6    | glutathione peroxidase 6                                      | 77   | 74   | 70   |
| 67305  | Gpx7    | glutathione peroxidase 7                                      | 103  | 94   | 93   |
| 69590  | Gpx8    | glutathione peroxidase 8 (putative)                           | 82   | 81   | 81   |
| 14783  | Grb10   | growth factor receptor bound protein 10                       | 747  | 728  | 717  |
| 14784  | Grb2    | growth factor receptor bound protein 2                        | 187  | 172  | 174  |
| 14786  | Grb7    | growth factor receptor bound protein 7                        | 141  | 137  | 137  |
| 23892  | Grem1   | gremlin 1                                                     | 663  | 678  | 639  |
| 195733 | Grhl1   | grainyhead-like 1 (Drosophila)                                | 215  | 208  | 209  |
| 252973 | Grhl2   | grainyhead-like 2 (Drosophila)                                | 580  | 579  | 581  |
| 230824 | Grhl3   | grainyhead-like 3 (Drosophila)                                | 166  | 163  | 162  |
| 76238  | Grhpr   | glyoxylate reductase/hydroxypyruvate reductase                | 325  | 316  | 316  |
| 14799  | Gria1   | glutamate receptor, ionotropic, AMPA1 (alpha 1)               | 1953 | 1926 | 1909 |
| 14800  | Gria2   | glutamate receptor, ionotropic, AMPA2 (alpha 2)               | 1290 | 1292 | 1278 |
| 14807  | Grik3   | glutamate receptor, ionotropic, kainate 3                     | 464  | 481  | 486  |
| 14810  | Grin1   | glutamate receptor, ionotropic, NMDA1 (zeta 1)                | 53   | 54   | 50   |
| 14811  | Grin2a  | glutamate receptor, ionotropic, NMDA2A (epsilon 1)            | 1731 | 1734 | 1730 |
| 14813  | Grin2c  | glutamate receptor, ionotropic, NMDA2C (epsilon 3)            | 107  | 104  | 105  |
| 24013  | Grk1    | G protein-coupled receptor kinase 1                           | 47   | 49   | 51   |
| 14772  | Grk4    | G protein-coupled receptor kinase 4                           | 131  | 133  | 131  |
| 14773  | Grk5    | G protein-coupled receptor kinase 5                           | 388  | 384  | 378  |
| 26385  | Grk6    | G protein-coupled receptor kinase 6                           | 46   | 44   | 49   |
| 232906 | Grfl1   | glucocorticoid receptor DNA binding factor 1                  | 230  | 223  | 233  |
| 14816  | Grm1    | glutamate receptor, metabotropic 1                            | 677  | 685  | 678  |
| 108068 | Grm2    | glutamate receptor, metabotropic 2                            | 71   | 65   | 78   |
| 108069 | Grm3    | glutamate receptor, metabotropic 3                            | 1886 | 1912 | 1831 |
| 268934 | Grm4    | glutamate receptor, metabotropic 4                            | 458  | 442  | 454  |
| 108071 | Grm5    | glutamate receptor, metabotropic 5                            | 978  | 993  | 953  |
| 108072 | Grm6    | glutamate receptor, metabotropic 6                            | 61   | 52   | 55   |
| 108073 | Grm7    | glutamate receptor, metabotropic 7                            | 4268 | 4270 | 4275 |
| 14823  | Grm8    | glutamate receptor, metabotropic 8                            | 392  | 407  | 403  |
| 17713  | Grpel1  | GrpE-like 1, mitochondrial                                    | 117  | 102  | 112  |
| 17714  | Grpel2  | GrpE-like 2, mitochondrial                                    | 24   | 23   | 25   |
| 433899 | Grxcr1  | glutaredoxin, cysteine rich 1                                 | 1867 | 1887 | 1857 |
| 14836  | Gsc     | goosecoid homeobox                                            | 446  | 440  | 427  |
| 14841  | Gsg2    | germ cell-specific gene 2                                     | 97   | 85   | 91   |

|        |          |                                                                  |      |      |      |
|--------|----------|------------------------------------------------------------------|------|------|------|
| 606496 | Gsk3a    | glycogen synthase kinase 3 alpha                                 | 35   | 37   | 34   |
| 56637  | Gsk3b    | glycogen synthase kinase 3 beta                                  | 218  | 227  | 226  |
| 14852  | Gspt1    | G1 to S phase transition 1                                       | 66   | 64   | 63   |
| 14853  | Gspt2    | G1 to S phase transition 2                                       | 214  | 214  | 202  |
| 14782  | Gsr      | glutathione reductase                                            | 126  | 129  | 116  |
| 14854  | Gss      | glutathione synthetase                                           | 123  | 121  | 114  |
| 14857  | Gsta1    | glutathione S-transferase, alpha 1 (Ya)                          | 127  | 130  | 129  |
| 14858  | Gsta2    | glutathione S-transferase, alpha 2 (Yc2)                         | 55   | 51   | 55   |
| 14859  | Gsta3    | glutathione S-transferase, alpha 3                               | 102  | 102  | 105  |
| 14860  | Gsta4    | glutathione S-transferase, alpha 4                               | 154  | 146  | 147  |
| 67553  | Gstcd    | glutathione S-transferase, C-terminal domain containing          | 175  | 176  | 167  |
| 76263  | Gstk1    | glutathione S-transferase kappa 1                                | 61   | 62   | 56   |
| 14862  | Gstm1    | glutathione S-transferase, mu 1                                  | 70   | 68   | 73   |
| 14863  | Gstm2    | glutathione S-transferase, mu 2                                  | 65   | 59   | 65   |
| 14864  | Gstm3    | glutathione S-transferase, mu 3                                  | 57   | 55   | 54   |
| 14865  | Gstm4    | glutathione S-transferase, mu 4                                  | 88   | 93   | 89   |
| 14866  | Gstm5    | glutathione S-transferase, mu 5                                  | 25   | 24   | 24   |
| 14867  | Gstm6    | glutathione S-transferase, mu 6                                  | 50   | 49   | 45   |
| 68312  | Gstm7    | glutathione S-transferase, mu 7                                  | 62   | 60   | 65   |
| 14873  | Gsto1    | glutathione S-transferase omega 1                                | 38   | 39   | 35   |
| 68214  | Gsto2    | glutathione S-transferase omega 2                                | 82   | 83   | 83   |
| 14870  | Gstp1    | glutathione S-transferase, pi 1                                  | 41   | 42   | 33   |
| 14869  | Gstp2    | glutathione S-transferase, pi 2                                  | 30   | 28   | 30   |
| 14871  | Gstt1    | glutathione S-transferase, theta 1                               | 51   | 50   | 56   |
| 14872  | Gstt2    | glutathione S-transferase, theta 2                               | 50   | 51   | 52   |
| 103140 | Gstt3    | glutathione S-transferase, theta 3                               | 33   | 37   | 33   |
| 14874  | Gstz1    | glutathione transferase zeta 1 (maleylacetoacetate isomerase)    | 56   | 54   | 62   |
| 14842  | Gsx1     | GS homeobox 1                                                    | 247  | 236  | 240  |
| 14843  | Gsx2     | GS homeobox 2                                                    | 143  | 141  | 141  |
| 227835 | Gtdc1    | glycosyltransferase-like domain containing 1                     | 1729 | 1742 | 1693 |
| 83602  | Gtf2a1   | general transcription factor II A, 1                             | 321  | 330  | 314  |
| 71828  | Gtf2a1l  | general transcription factor IIA, 1-like                         | 213  | 216  | 209  |
| 235459 | Gtf2a2   | general transcription factor II A, 2                             | 56   | 57   | 55   |
| 229906 | Gtf2b    | general transcription factor IIB                                 | 231  | 233  | 232  |
| 74197  | Gtf2e1   | general transcription factor II E, polypeptide 1 (alpha subunit) | 201  | 208  | 202  |
| 68153  | Gtf2e2   | general transcription factor II E, polypeptide 2 (beta subunit)  | 352  | 373  | 360  |
| 98053  | Gtf2f1   | general transcription factor IIF, polypeptide 1                  | 42   | 40   | 36   |
| 68705  | Gtf2f2   | general transcription factor IIF, polypeptide 2                  | 207  | 202  | 203  |
| 14884  | Gtf2h1   | general transcription factor II H, polypeptide 1                 | 69   | 68   | 66   |
| 23894  | Gtf2h2   | general transcription factor II H, polypeptide 2                 | 133  | 133  | 125  |
| 209357 | Gtf2h3   | general transcription factor IIH, polypeptide 3                  | 27   | 29   | 27   |
| 14885  | Gtf2h4   | general transcription factor II H, polypeptide 4                 | 37   | 38   | 48   |
| 66467  | Gtf2h5   | general transcription factor IIH, polypeptide 5                  | 38   | 33   | 37   |
| 14886  | Gtf2i    | general transcription factor II I                                | 295  | 293  | 285  |
| 57080  | Gtf2ird1 | general transcription factor II I repeat domain-containing 1     | 306  | 307  | 304  |
| 114674 | Gtf2ird2 | GTF2I repeat domain containing 2                                 | 74   | 75   | 69   |
| 66596  | Gtf3a    | general transcription factor III A                               | 150  | 152  | 160  |
| 233863 | Gtf3c1   | general transcription factor III C 1                             | 134  | 136  | 134  |
| 71752  | Gtf3c2   | general transcription factor IIIC, polypeptide 2, beta           | 48   | 52   | 52   |
| 269252 | Gtf3c4   | general transcription factor IIIC, polypeptide 4                 | 134  | 134  | 136  |
| 70239  | Gtf3c5   | general transcription factor IIIC, polypeptide 5                 | 81   | 67   | 80   |
| 67371  | Gtf3c6   | general transcription factor IIIC, polypeptide 6, alpha          | 80   | 69   | 79   |
| 14904  | Gtpbp1   | GTP binding protein 1                                            | 68   | 69   | 66   |
| 70359  | Gtpbp3   | GTP binding protein 3                                            | 29   | 28   | 29   |
| 69237  | Gtpbp4   | GTP binding protein 4                                            | 185  | 179  | 191  |

|        |         |                                                                    |      |      |      |
|--------|---------|--------------------------------------------------------------------|------|------|------|
| 14916  | Guca2b  | guanylate cyclase activator 2b (retina)                            | 223  | 219  | 220  |
| 234889 | Gucy1a2 | guanylate cyclase 1, soluble, alpha 2                              | 1133 | 1130 | 1135 |
| 60596  | Gucy1a3 | guanylate cyclase 1, soluble, alpha 3                              | 347  | 369  | 360  |
| 54195  | Gucy1b3 | guanylate cyclase 1, soluble, beta 3                               | 180  | 182  | 183  |
| 14917  | Gucy2c  | guanylate cyclase 2c                                               | 176  | 186  | 176  |
| 14918  | Gucy2d  | guanylate cyclase 2d                                               | 170  | 174  | 175  |
| 14919  | Gucy2e  | guanylate cyclase 2e                                               | 161  | 160  | 158  |
| 245650 | Gucy2f  | guanylate cyclase 2f                                               | 609  | 627  | 605  |
| 73707  | Gucy2g  | guanylate cyclase 2g                                               | 89   | 96   | 91   |
| 231279 | Guf1    | GUF1 GTPase homolog (S. cerevisiae)                                | 64   | 65   | 63   |
| 14923  | Guk1    | guanylate kinase 1                                                 | 28   | 31   | 30   |
| 268756 | Gulo    | gulonolactone (L-) oxidase                                         | 137  | 137  | 141  |
| 110006 | Gusb    | glucuronidase, beta                                                | 114  | 105  | 107  |
| 223827 | Gxylt1  | glucoside xylosyltransferase 1                                     | 938  | 937  | 932  |
| 232313 | Gxylt2  | glucoside xylosyltransferase 2                                     | 213  | 205  | 216  |
| 27357  | Gyg     | glycogenin                                                         | 230  | 235  | 238  |
| 14933  | Gyk     | glycerol kinase                                                    | 358  | 367  | 353  |
| 14625  | Gykl1   | glycerol kinase-like 1                                             | 151  | 159  | 150  |
| 14936  | Gys1    | glycogen synthase 1, muscle                                        | 36   | 32   | 37   |
| 232493 | Gys2    | glycogen synthase 2                                                | 162  | 154  | 164  |
| 74533  | Gzfi    | GDNF-inducible zinc finger protein 1                               | 73   | 76   | 77   |
| 14938  | Gzma    | granzyme A                                                         | 162  | 175  | 178  |
| 14939  | Gzmb    | granzyme B                                                         | 160  | 167  | 162  |
| 14940  | Gzmc    | granzyme C                                                         | 63   | 67   | 67   |
| 14941  | Gzmd    | granzyme D                                                         | 52   | 52   | 47   |
| 14942  | Gzme    | granzyme E                                                         | 36   | 41   | 44   |
| 14943  | Gzmf    | granzyme F                                                         | 68   | 73   | 72   |
| 14944  | Gzmg    | granzyme G                                                         | 56   | 56   | 58   |
| 14945  | Gzmk    | granzyme K                                                         | 140  | 147  | 136  |
| 16904  | Gzmm    | granzyme M (lymphocyte met-ase 1)                                  | 28   | 25   | 30   |
| 245839 | Gzmn    | granzyme N                                                         | 61   | 64   | 66   |
| 14950  | H13     | histocompatibility 13                                              | 76   | 78   | 77   |
| 14958  | H1f0    | H1 histone family, member 0                                        | 62   | 62   | 62   |
| 70069  | H1fnt   | H1 histone family, member N, testis-specific                       | 76   | 74   | 78   |
| 171506 | H1foo   | H1 histone family, member O, oocyte-specific                       | 83   | 73   | 79   |
| 232440 | H2afj   | H2A histone family, member J                                       | 30   | 28   | 28   |
| 77605  | H2afv   | H2A histone family, member V                                       | 83   | 76   | 78   |
| 15270  | H2afx   | H2A histone family, member X                                       | 17   | 17   | 17   |
| 26914  | H2afy   | H2A histone family, member Y                                       | 438  | 447  | 436  |
| 404634 | H2afy2  | H2A histone family, member Y2                                      | 349  | 338  | 326  |
| 51788  | H2afz   | H2A histone family, member Z                                       | 329  | 318  | 316  |
| 14998  | H2-DMa  | histocompatibility 2, class II, locus DMA                          | 31   | 30   | 30   |
| 14999  | H2-DMb1 | histocompatibility 2, class II, locus Mb1                          | 54   | 50   | 57   |
| 15000  | H2-DMb2 | histocompatibility 2, class II, locus Mb2                          | 24   | 24   | 24   |
| 14976  | H2-Ke2  | H2-K region expressed gene 2                                       | 13   | 17   | 12   |
| 14979  | H2-Ke6  | H2-K region expressed gene 6                                       | 8    | 5    | 5    |
| 109815 | H47     | histocompatibility 47                                              | 59   | 67   | 66   |
| 100198 | H6pd    | hexose-6-phosphate dehydrogenase (glucose 1-dehydrogenase)         | 139  | 144  | 147  |
| 107766 | Hao     | 3-hydroxyanthranilate 3,4-dioxygenase                              | 627  | 611  | 626  |
| 226243 | Habp2   | hyaluronic acid binding protein 2                                  | 640  | 635  | 630  |
| 56541  | Habp4   | hyaluronic acid binding protein 4                                  | 125  | 128  | 121  |
| 209462 | Hace1   | HECT domain and ankyrin repeat containing, E3 ubiquitin protein li | 5459 | 5506 | 5389 |
| 56794  | Hacl1   | 2-hydroxyacyl-CoA lyase 1                                          | 83   | 76   | 83   |
| 15107  | Hadh    | hydroxyacyl-Coenzyme A dehydrogenase                               | 258  | 249  | 262  |
| 97212  | Hadha   | hydroxyacyl-Coenzyme A dehydrogenase/3-ketoacyl-Coenzyme A         | 69   | 67   | 64   |

|        |         |                                                                 |      |      |      |
|--------|---------|-----------------------------------------------------------------|------|------|------|
| 231086 | Hadhb   | hydroxyacyl-Coenzyme A dehydrogenase/3-ketoacyl-Coenzyme A      | 20   | 17   | 23   |
| 14651  | Hagh    | hydroxyacyl glutathione hydrolase                               | 39   | 37   | 34   |
| 15109  | Hal     | histidine ammonia lyase                                         | 105  | 108  | 103  |
| 15110  | Hand1   | heart and neural crest derivatives expressed transcript 1       | 268  | 255  | 265  |
| 15111  | Hand2   | heart and neural crest derivatives expressed transcript 2       | 1142 | 1153 | 1135 |
| 15112  | Hao1    | hydroxyacid oxidase 1, liver                                    | 1366 | 1390 | 1395 |
| 56185  | Hao2    | hydroxyacid oxidase 2                                           | 361  | 348  | 352  |
| 15115  | Hars    | histidyl-tRNA synthetase                                        | 24   | 25   | 22   |
| 70791  | Hars2   | histidyl-tRNA synthetase 2, mitochondrial (putative)            | 15   | 13   | 11   |
| 15116  | Has1    | hyaluronan synthase1                                            | 64   | 64   | 68   |
| 15118  | Has3    | hyaluronan synthase 3                                           | 275  | 282  | 272  |
| 107435 | Hat1    | histone aminotransferase 1                                      | 110  | 116  | 110  |
| 110257 | Hba-a2  | hemoglobin alpha, adult chain 2                                 | 8    | 6    | 7    |
| 15126  | Hba-x   | hemoglobin X, alpha-like embryonic chain in Hba complex         | 20   | 22   | 19   |
| 15132  | Hbb-bh1 | hemoglobin Z, beta-like embryonic chain                         | 14   | 15   | 17   |
| 15135  | Hbb-y   | hemoglobin Y, beta-like embryonic chain                         | 53   | 51   | 46   |
| 15200  | Hbegf   | heparin-binding EGF-like growth factor                          | 100  | 95   | 99   |
| 73389  | Hbp1    | high mobility group box transcription factor 1                  | 455  | 460  | 443  |
| 15139  | Hc      | hemolytic complement                                            | 179  | 186  | 171  |
| 15161  | Hcfc1   | host cell factor C1                                             | 120  | 108  | 114  |
| 67933  | Hcfc2   | host cell factor C2                                             | 97   | 98   | 94   |
| 15162  | Hck     | hemopoietic cell kinase                                         | 123  | 132  | 130  |
| 15163  | Hcls1   | hematopoietic cell specific Lyn substrate 1                     | 117  | 122  | 118  |
| 15171  | Hcrt    | hypocretin                                                      | 14   | 13   | 15   |
| 433759 | Hdac1   | histone deacetylase 1                                           | 58   | 53   | 56   |
| 170787 | Hdac10  | histone deacetylase 10                                          | 22   | 21   | 24   |
| 232232 | Hdac11  | histone deacetylase 11                                          | 116  | 125  | 121  |
| 15182  | Hdac2   | histone deacetylase 2                                           | 801  | 794  | 802  |
| 15183  | Hdac3   | histone deacetylase 3                                           | 26   | 26   | 27   |
| 208727 | Hdac4   | histone deacetylase 4                                           | 865  | 841  | 845  |
| 15184  | Hdac5   | histone deacetylase 5                                           | 74   | 68   | 73   |
| 15185  | Hdac6   | histone deacetylase 6                                           | 49   | 51   | 47   |
| 56233  | Hdac7   | histone deacetylase 7                                           | 188  | 187  | 184  |
| 70315  | Hdac8   | histone deacetylase 8                                           | 492  | 488  | 475  |
| 79221  | Hdac9   | histone deacetylase 9                                           | 1330 | 1319 | 1276 |
| 15186  | Hdc     | histidine decarboxylase                                         | 167  | 159  | 157  |
| 68695  | Hddc3   | HD domain containing 3                                          | 42   | 35   | 41   |
| 15191  | Hdgf    | hepatoma-derived growth factor                                  | 42   | 45   | 37   |
| 15193  | Hdgfrp2 | hepatoma-derived growth factor, related protein 2               | 49   | 48   | 47   |
| 67365  | Hdhd1a  | haloacid dehalogenase-like hydrolase domain containing 1A       | 1062 | 1078 | 1061 |
| 76987  | Hdhd2   | haloacid dehalogenase-like hydrolase domain containing 2        | 153  | 152  | 149  |
| 72748  | Hdhd3   | haloacid dehalogenase-like hydrolase domain containing 3        | 50   | 54   | 50   |
| 110611 | Hdlbp   | high density lipoprotein (HDL) binding protein                  | 140  | 130  | 137  |
| 15199  | Hebp1   | heme binding protein 1                                          | 98   | 101  | 100  |
| 207304 | Hectd1  | HECT domain containing 1                                        | 366  | 358  | 371  |
| 226098 | Hectd2  | HECT domain containing 2                                        | 402  | 389  | 395  |
| 76608  | Hectd3  | HECT domain containing 3                                        | 30   | 30   | 30   |
| 94253  | Hecw1   | HECT, C2 and WW domain containing E3 ubiquitin protein ligase 1 | 682  | 699  | 691  |
| 329152 | Hecw2   | HECT, C2 and WW domain containing E3 ubiquitin protein ligase 2 | 575  | 597  | 591  |
| 117599 | Helb    | helicase (DNA) B                                                | 503  | 509  | 486  |
| 15201  | Hells   | helicase, lymphoid specific                                     | 230  | 224  | 226  |
| 191578 | Helq    | helicase, POLQ-like                                             | 103  | 103  | 109  |
| 234219 | Helt    | Hey-like transcription factor (zebrafish)                       | 330  | 322  | 330  |
| 69536  | Hemk1   | HemK methyltransferase family member 1                          | 51   | 62   | 52   |
| 15203  | Heph    | hephaestin                                                      | 422  | 439  | 419  |

|        |           |                                                                    |      |      |      |
|--------|-----------|--------------------------------------------------------------------|------|------|------|
| 244698 | Heph11    | hephaestin-like 1                                                  | 252  | 250  | 238  |
| 15204  | Herc2     | hect (homologous to the E6-AP (UBE3A) carboxyl terminus) domai     | 273  | 279  | 280  |
| 73998  | Herc3     | hect domain and RLD 3                                              | 397  | 396  | 383  |
| 67345  | Herc4     | hect domain and RLD 4                                              | 181  | 174  | 171  |
| 67138  | Herc6     | hect domain and RLD 6                                              | 191  | 201  | 187  |
| 15205  | Hes1      | hairy and enhancer of split 1 (Drosophila)                         | 333  | 301  | 332  |
| 15206  | Hes2      | hairy and enhancer of split 2 (Drosophila)                         | 33   | 33   | 28   |
| 15207  | Hes3      | hairy and enhancer of split 3 (Drosophila)                         | 26   | 18   | 22   |
| 15208  | Hes5      | hairy and enhancer of split 5 (Drosophila)                         | 43   | 40   | 38   |
| 55927  | Hes6      | hairy and enhancer of split 6 (Drosophila)                         | 59   | 69   | 61   |
| 84653  | Hes7      | hairy and enhancer of split 7 (Drosophila)                         | 30   | 25   | 24   |
| 15209  | Hesx1     | homeobox gene expressed in ES cells                                | 89   | 92   | 87   |
| 15211  | Hexa      | hexosaminidase A                                                   | 71   | 67   | 66   |
| 15212  | Hexb      | hexosaminidase B                                                   | 135  | 128  | 132  |
| 238023 | Hexdc     | hexosaminidase (glycosyl hydrolase family 20, catalytic domain) cc | 90   | 82   | 85   |
| 192231 | Hexim1    | hexamethylene bis-acetamide inducible 1                            | 39   | 39   | 42   |
| 71059  | Hexim2    | hexamthylene bis-acetamide inducible 2                             | 63   | 62   | 71   |
| 15213  | Hey1      | hairy/enhancer-of-split related with YRPW motif 1                  | 531  | 520  | 518  |
| 15214  | Hey2      | hairy/enhancer-of-split related with YRPW motif 2                  | 634  | 660  | 644  |
| 56198  | Heyl      | hairy/enhancer-of-split related with YRPW motif-like               | 98   | 97   | 102  |
| 15216  | Hfe       | hemochromatosis                                                    | 52   | 51   | 52   |
| 15233  | Hgd       | homogentisate 1, 2-dioxygenase                                     | 153  | 152  | 161  |
| 15234  | Hgf       | hepatocyte growth factor                                           | 1880 | 1946 | 1873 |
| 54426  | Hgfac     | hepatocyte growth factor activator                                 | 42   | 42   | 46   |
| 15239  | Hgs       | HGF-regulated tyrosine kinase substrate                            | 20   | 25   | 23   |
| 52120  | Hgsnat    | heparan-alpha-glucosaminide N-acetyltransferase                    | 191  | 188  | 198  |
| 226861 | Hhat      | hedgehog acyltransferase                                           | 862  | 853  | 850  |
| 74770  | Hhatl     | hedgehog acyltransferase-like                                      | 81   | 82   | 72   |
| 15242  | Hhex      | hematopoietically expressed homeobox                               | 220  | 223  | 223  |
| 214305 | Hhip1     | hedgehog interacting protein-like 1                                | 75   | 71   | 69   |
| 58875  | Hibadh    | 3-hydroxyisobutyrate dehydrogenase                                 | 509  | 517  | 492  |
| 227095 | Hibch     | 3-hydroxyisobutyryl-Coenzyme A hydrolase                           | 177  | 180  | 177  |
| 15248  | Hic1      | hypermethylated in cancer 1                                        | 128  | 133  | 129  |
| 58180  | Hic2      | hypermethylated in cancer 2                                        | 87   | 88   | 92   |
| 15251  | Hif1a     | hypoxia inducible factor 1, alpha subunit                          | 484  | 486  | 494  |
| 319594 | Hif1an    | hypoxia-inducible factor 1, alpha subunit inhibitor                | 251  | 264  | 262  |
| 53417  | Hif3a     | hypoxia inducible factor 3, alpha subunit                          | 69   | 56   | 66   |
| 54388  | Hils1     | histone H1-like protein in spermatids 1                            | 44   | 49   | 48   |
| 102423 | Hinfp     | histone H4 transcription factor                                    | 39   | 41   | 40   |
| 68917  | Hint2     | histidine triad nucleotide binding protein 2                       | 20   | 19   | 16   |
| 215114 | Hip1      | huntingtin interacting protein 1                                   | 222  | 211  | 222  |
| 15257  | Hipk1     | homeodomain interacting protein kinase 1                           | 89   | 91   | 91   |
| 15258  | Hipk2     | homeodomain interacting protein kinase 2                           | 367  | 365  | 367  |
| 15259  | Hipk3     | homeodomain interacting protein kinase 3                           | 207  | 202  | 207  |
| 233020 | Hipk4     | homeodomain interacting protein kinase 4                           | 67   | 70   | 68   |
| 15260  | Hira      | histone cell cycle regulation defective homolog A (S. cerevisiae)  | 523  | 527  | 511  |
| 80838  | Hist1h1a  | histone cluster 1, H1a                                             | 26   | 27   | 27   |
| 56702  | Hist1h1b  | histone cluster 1, H1b                                             | 38   | 36   | 40   |
| 50708  | Hist1h1c  | histone cluster 1, H1c                                             | 44   | 44   | 36   |
| 14957  | Hist1h1d  | histone cluster 1, H1d                                             | 14   | 12   | 12   |
| 50709  | Hist1h1e  | histone cluster 1, H1e                                             | 79   | 77   | 74   |
| 107970 | Hist1h1t  | histone cluster 1, H1t                                             | 19   | 19   | 21   |
| 319173 | Hist1h2af | histone cluster 1, H2af                                            | 5    | 6    | 5    |
| 319168 | Hist1h2ah | histone cluster 1, H2ah                                            | 33   | 34   | 34   |
| 319169 | Hist1h2ak | histone cluster 1, H2ak                                            | 3    | 5    | 2    |

|        |           |                                                                  |      |      |      |
|--------|-----------|------------------------------------------------------------------|------|------|------|
| 319177 | Hist1h2ba | histone cluster 1, H2ba                                          | 25   | 26   | 24   |
| 319178 | Hist1h2bb | histone cluster 1, H2bb                                          | 8    | 7    | 6    |
| 319182 | Hist1h2bh | histone cluster 1, H2bh                                          | 8    | 8    | 9    |
| 319184 | Hist1h2bk | histone cluster 1, H2bk                                          | 9    | 7    | 7    |
| 319186 | Hist1h2bm | histone cluster 1, H2bm                                          | 22   | 23   | 24   |
| 319188 | Hist1h2bp | histone cluster 1, H2bp                                          | 28   | 29   | 28   |
| 621893 | Hist2h2ab | histone cluster 2, H2ab                                          | 32   | 26   | 29   |
| 319189 | Hist2h2bb | histone cluster 2, H2bb                                          | 29   | 34   | 35   |
| 319190 | Hist2h2be | histone cluster 2, H2be                                          | 24   | 22   | 22   |
| 15077  | Hist2h3c1 | histone cluster 2, H3c1                                          | 41   | 47   | 38   |
| 319162 | Hist3h2a  | histone cluster 3, H2a                                           | 12   | 12   | 12   |
| 78303  | Hist3h2ba | histone cluster 3, H2ba                                          | 20   | 18   | 21   |
| 110521 | Hivep1    | human immunodeficiency virus type I enhancer binding protein 1   | 551  | 545  | 547  |
| 15273  | Hivep2    | human immunodeficiency virus type I enhancer binding protein 2   | 853  | 880  | 865  |
| 16656  | Hivep3    | human immunodeficiency virus type I enhancer binding protein 3   | 642  | 652  | 645  |
| 381280 | Hjurp     | Holliday junction recognition protein                            | 36   | 35   | 40   |
| 15275  | Hk1       | hexokinase 1                                                     | 220  | 210  | 213  |
| 15277  | Hk2       | hexokinase 2                                                     | 376  | 364  | 373  |
| 212032 | Hk3       | hexokinase 3                                                     | 193  | 189  | 193  |
| 216019 | Hkdc1     | hexokinase domain containing 1                                   | 95   | 86   | 93   |
| 110948 | Hlcs      | holocarboxylase synthetase (biotin- [propionyl-Coenzyme A-carbo: | 462  | 457  | 466  |
| 217082 | Hlf       | hepatic leukemia factor                                          | 503  | 490  | 491  |
| 20585  | Hlhf      | helicase-like transcription factor                               | 159  | 152  | 153  |
| 15284  | Hlx       | H2.0-like homeobox                                               | 969  | 979  | 981  |
| 219150 | Hmbox1    | homeobox containing 1                                            | 388  | 384  | 385  |
| 15288  | Hmbs      | hydroxymethylbilane synthase                                     | 34   | 38   | 39   |
| 66867  | Hmg20a    | high mobility group 20A                                          | 343  | 349  | 358  |
| 15353  | Hmg20b    | high mobility group 20 B                                         | 14   | 18   | 14   |
| 15361  | Hmga1     | high mobility group AT-hook 1                                    | 67   | 59   | 68   |
| 15364  | Hmga2     | high mobility group AT-hook 2                                    | 398  | 411  | 405  |
| 15289  | Hmgb1     | high mobility group box 1                                        | 294  | 283  | 284  |
| 97165  | Hmgb2     | high mobility group box 2                                        | 216  | 207  | 207  |
| 15356  | Hmgcl     | 3-hydroxy-3-methylglutaryl-Coenzyme A lyase                      | 58   | 58   | 61   |
| 15357  | Hmgcr     | 3-hydroxy-3-methylglutaryl-Coenzyme A reductase                  | 480  | 485  | 484  |
| 15360  | Hmgcs2    | 3-hydroxy-3-methylglutaryl-Coenzyme A synthase 2                 | 157  | 158  | 144  |
| 15312  | Hmgn1     | high mobility group nucleosomal binding domain 1                 | 78   | 78   | 82   |
| 94353  | Hmgn3     | high mobility group nucleosomal binding domain 3                 | 582  | 617  | 589  |
| 50887  | Hmgn5     | high-mobility group nucleosome binding domain 5                  | 111  | 107  | 101  |
| 15368  | Hmox1     | heme oxygenase (decycling) 1                                     | 100  | 102  | 101  |
| 15369  | Hmox2     | heme oxygenase (decycling) 2                                     | 111  | 117  | 109  |
| 15371  | Hmx1      | H6 homeobox 1                                                    | 311  | 313  | 304  |
| 15372  | Hmx2      | H6 homeobox 2                                                    | 17   | 19   | 17   |
| 15373  | Hmx3      | H6 homeobox 3                                                    | 173  | 190  | 176  |
| 21405  | Hnf1a     | HNF1 homeobox A                                                  | 88   | 79   | 84   |
| 21410  | Hnf1b     | HNF1 homeobox B                                                  | 247  | 242  | 237  |
| 15378  | Hnf4a     | hepatic nuclear factor 4, alpha                                  | 78   | 78   | 82   |
| 30942  | Hnf4g     | hepatocyte nuclear factor 4, gamma                               | 3450 | 3466 | 3402 |
| 140483 | Hnmt      | histamine N-methyltransferase                                    | 665  | 681  | 649  |
| 53379  | Hnrnpa2b1 | heterogeneous nuclear ribonucleoprotein A2/B1                    | 44   | 44   | 46   |
| 229279 | Hnrnpa3   | heterogeneous nuclear ribonucleoprotein A3                       | 1082 | 1100 | 1068 |
| 15384  | Hnrnpab   | heterogeneous nuclear ribonucleoprotein A/B                      | 38   | 41   | 40   |
| 15381  | Hnrnpc    | heterogeneous nuclear ribonucleoprotein C                        | 56   | 58   | 56   |
| 11991  | Hnrnpd    | heterogeneous nuclear ribonucleoprotein D                        | 411  | 406  | 395  |
| 98758  | Hnrnpf    | heterogeneous nuclear ribonucleoprotein F                        | 115  | 109  | 118  |
| 59013  | HnrnpH1   | heterogeneous nuclear ribonucleoprotein H1                       | 100  | 92   | 94   |

|        |          |                                                  |     |     |     |
|--------|----------|--------------------------------------------------|-----|-----|-----|
| 15388  | Hnrnpl   | heterogeneous nuclear ribonucleoprotein L        | 47  | 44  | 42  |
| 76936  | Hnrnrm   | heterogeneous nuclear ribonucleoprotein M        | 102 | 96  | 105 |
| 51810  | Hnrnpu   | heterogeneous nuclear ribonucleoprotein U        | 107 | 105 | 115 |
| 232989 | Hnrnpul1 | heterogeneous nuclear ribonucleoprotein U-like 1 | 85  | 84  | 88  |
| 50926  | Hnrpdl   | heterogeneous nuclear ribonucleoprotein D-like   | 74  | 76  | 73  |
| 72692  | Hnrpll   | heterogeneous nuclear ribonucleoprotein L-like   | 299 | 300 | 293 |
| 67432  | Hoga1    | 4-hydroxy-2-oxoglutarate aldolase 1              | 22  | 19  | 22  |
| 239099 | Homez    | homeodomain leucine zipper-encoding gene         | 130 | 132 | 130 |
| 74318  | Hopx     | HOP homeobox                                     | 273 | 281 | 274 |
| 67981  | Hormad1  | HORMA domain containing 1                        | 86  | 81  | 81  |
| 15394  | Hoxa1    | homeobox A1                                      | 194 | 193 | 197 |
| 15395  | Hoxa10   | homeobox A10                                     | 20  | 26  | 25  |
| 15396  | Hoxa11   | homeobox A11                                     | 18  | 18  | 21  |
| 15398  | Hoxa13   | homeobox A13                                     | 86  | 82  | 92  |
| 15399  | Hoxa2    | homeobox A2                                      | 35  | 35  | 33  |
| 15400  | Hoxa3    | homeobox A3                                      | 13  | 12  | 10  |
| 15401  | Hoxa4    | homeobox A4                                      | 47  | 46  | 45  |
| 15402  | Hoxa5    | homeobox A5                                      | 9   | 7   | 8   |
| 15403  | Hoxa6    | homeobox A6                                      | 11  | 9   | 12  |
| 15404  | Hoxa7    | homeobox A7                                      | 14  | 15  | 15  |
| 15405  | Hoxa9    | homeobox A9                                      | 12  | 14  | 14  |
| 15407  | Hoxb1    | homeobox B1                                      | 149 | 146 | 153 |
| 15408  | Hoxb13   | homeobox B13                                     | 153 | 150 | 152 |
| 103889 | Hoxb2    | homeobox B2                                      | 23  | 25  | 26  |
| 15410  | Hoxb3    | homeobox B3                                      | 67  | 64  | 70  |
| 15412  | Hoxb4    | homeobox B4                                      | 7   | 6   | 6   |
| 15413  | Hoxb5    | homeobox B5                                      | 20  | 24  | 22  |
| 15414  | Hoxb6    | homeobox B6                                      | 20  | 19  | 20  |
| 15415  | Hoxb7    | homeobox B7                                      | 17  | 20  | 16  |
| 15416  | Hoxb8    | homeobox B8                                      | 16  | 16  | 16  |
| 15417  | Hoxb9    | homeobox B9                                      | 18  | 17  | 19  |
| 209448 | Hoxc10   | homeobox C10                                     | 21  | 24  | 23  |
| 15421  | Hoxc12   | homeobox C12                                     | 38  | 44  | 34  |
| 15422  | Hoxc13   | homeobox C13                                     | 268 | 274 | 272 |
| 15423  | Hoxc4    | homeobox C4                                      | 192 | 191 | 183 |
| 15424  | Hoxc5    | homeobox C5                                      | 4   | 3   | 5   |
| 15425  | Hoxc6    | homeobox C6                                      | 28  | 25  | 28  |
| 15426  | Hoxc8    | homeobox C8                                      | 37  | 40  | 35  |
| 15427  | Hoxc9    | homeobox C9                                      | 21  | 20  | 19  |
| 15430  | Hoxd10   | homeobox D10                                     | 19  | 17  | 18  |
| 15431  | Hoxd11   | homeobox D11                                     | 16  | 17  | 15  |
| 15432  | Hoxd12   | homeobox D12                                     | 17  | 18  | 19  |
| 15433  | Hoxd13   | homeobox D13                                     | 21  | 19  | 17  |
| 15434  | Hoxd3    | homeobox D3                                      | 15  | 10  | 11  |
| 15436  | Hoxd4    | homeobox D4                                      | 13  | 13  | 10  |
| 15437  | Hoxd8    | homeobox D8                                      | 15  | 17  | 13  |
| 15438  | Hoxd9    | homeobox D9                                      | 17  | 12  | 15  |
| 15439  | Hp       | haptoglobin                                      | 54  | 58  | 56  |
| 15441  | Hp1bp3   | heterochromatin protein 1, binding protein 3     | 329 | 319 | 326 |
| 15445  | Hpd      | 4-hydroxyphenylpyruvic acid dioxygenase          | 112 | 129 | 120 |
| 242642 | Hpdl     | 4-hydroxyphenylpyruvate dioxygenase-like         | 89  | 85  | 89  |
| 15446  | Hpgd     | hydroxyprostaglandin dehydrogenase 15 (NAD)      | 745 | 778 | 768 |
| 54486  | Hpgds    | hematopoietic prostaglandin D synthase           | 428 | 430 | 435 |
| 15451  | Hpn      | hepsin                                           | 62  | 59  | 64  |
| 15452  | Hprt     | hypoxanthine guanine phosphoribosyl transferase  | 162 | 177 | 162 |

|        |          |                                                                     |      |      |      |
|--------|----------|---------------------------------------------------------------------|------|------|------|
| 15442  | Hpse     | heparanase                                                          | 161  | 165  | 159  |
| 15458  | Hpx      | hemopexin                                                           | 66   | 66   | 65   |
| 15460  | Hr       | hairless                                                            | 35   | 34   | 36   |
| 15461  | Hras1    | Harvey rat sarcoma virus oncogene 1                                 | 26   | 24   | 25   |
| 15465  | Hrh1     | histamine receptor H1                                               | 466  | 438  | 461  |
| 99296  | Hrh3     | histamine receptor H3                                               | 53   | 57   | 56   |
| 23908  | Hs2st1   | heparan sulfate 2-O-sulfotransferase 1                              | 464  | 469  | 475  |
| 54710  | Hs3st3b1 | heparan sulfate (glucosamine) 3-O-sulfotransferase 3B1              | 1244 | 1210 | 1228 |
| 319415 | Hs3st5   | heparan sulfate (glucosamine) 3-O-sulfotransferase 5                | 3164 | 3209 | 3093 |
| 328779 | Hs3st6   | heparan sulfate (glucosamine) 3-O-sulfotransferase 6                | 91   | 85   | 87   |
| 50785  | Hs6st1   | heparan sulfate 6-O-sulfotransferase 1                              | 1805 | 1788 | 1767 |
| 50786  | Hs6st2   | heparan sulfate 6-O-sulfotransferase 2                              | 731  | 725  | 720  |
| 50787  | Hs6st3   | heparan sulfate 6-O-sulfotransferase 3                              | 1185 | 1242 | 1201 |
| 100900 | Hscb     | HscB iron-sulfur cluster co-chaperone homolog (E. coli)             | 46   | 35   | 39   |
| 15483  | Hsd11b1  | hydroxysteroid 11-beta dehydrogenase 1                              | 124  | 116  | 125  |
| 15484  | Hsd11b2  | hydroxysteroid 11-beta dehydrogenase 2                              | 90   | 85   | 94   |
| 15485  | Hsd17b1  | hydroxysteroid (17-beta) dehydrogenase 1                            | 19   | 18   | 18   |
| 15108  | Hsd17b10 | hydroxysteroid (17-beta) dehydrogenase 10                           | 125  | 136  | 130  |
| 114664 | Hsd17b11 | hydroxysteroid (17-beta) dehydrogenase 11                           | 93   | 98   | 87   |
| 56348  | Hsd17b12 | hydroxysteroid (17-beta) dehydrogenase 12                           | 303  | 289  | 286  |
| 243168 | Hsd17b13 | hydroxysteroid (17-beta) dehydrogenase 13                           | 144  | 142  | 137  |
| 66065  | Hsd17b14 | hydroxysteroid (17-beta) dehydrogenase 14                           | 56   | 53   | 58   |
| 15486  | Hsd17b2  | hydroxysteroid (17-beta) dehydrogenase 2                            | 169  | 167  | 161  |
| 15487  | Hsd17b3  | hydroxysteroid (17-beta) dehydrogenase 3                            | 407  | 410  | 403  |
| 15488  | Hsd17b4  | hydroxysteroid (17-beta) dehydrogenase 4                            | 294  | 284  | 287  |
| 27400  | Hsd17b6  | hydroxysteroid (17-beta) dehydrogenase 6                            | 146  | 157  | 152  |
| 15490  | Hsd17b7  | hydroxysteroid (17-beta) dehydrogenase 7                            | 216  | 207  | 201  |
| 15492  | Hsd3b1   | hydroxy-delta-5-steroid dehydrogenase, 3 beta- and steroid delta-i: | 103  | 106  | 105  |
| 15493  | Hsd3b2   | hydroxy-delta-5-steroid dehydrogenase, 3 beta- and steroid delta-i: | 145  | 158  | 145  |
| 15494  | Hsd3b3   | hydroxy-delta-5-steroid dehydrogenase, 3 beta- and steroid delta-i: | 120  | 114  | 117  |
| 15496  | Hsd3b5   | hydroxy-delta-5-steroid dehydrogenase, 3 beta- and steroid delta-i: | 206  | 216  | 198  |
| 15497  | Hsd3b6   | hydroxy-delta-5-steroid dehydrogenase, 3 beta- and steroid delta-i: | 126  | 123  | 127  |
| 101502 | Hsd3b7   | hydroxy-delta-5-steroid dehydrogenase, 3 beta- and steroid delta-i: | 58   | 57   | 59   |
| 72552  | Hsd11    | hydroxysteroid dehydrogenase like 1                                 | 20   | 19   | 18   |
| 72479  | Hsd12    | hydroxysteroid dehydrogenase like 2                                 | 105  | 104  | 96   |
| 15499  | Hsf1     | heat shock factor 1                                                 | 43   | 46   | 41   |
| 15500  | Hsf2     | heat shock factor 2                                                 | 1466 | 1480 | 1448 |
| 245525 | Hsf3     | heat shock transcription factor 3                                   | 193  | 209  | 187  |
| 26386  | Hsf4     | heat shock transcription factor 4                                   | 11   | 14   | 12   |
| 327992 | Hsf5     | heat shock transcription factor family member 5                     | 92   | 92   | 93   |
| 15519  | Hsp90aa1 | heat shock protein 90, alpha (cytosolic), class A member 1          | 76   | 71   | 71   |
| 15516  | Hsp90ab1 | heat shock protein 90 alpha (cytosolic), class B member 1           | 31   | 31   | 31   |
| 22027  | Hsp90b1  | heat shock protein 90, beta (Grp94), member 1                       | 22   | 25   | 26   |
| 193740 | Hspa1a   | heat shock protein 1A                                               | 11   | 12   | 14   |
| 15511  | Hspa1b   | heat shock protein 1B                                               | 22   | 19   | 23   |
| 15512  | Hspa2    | heat shock protein 2                                                | 58   | 60   | 57   |
| 18415  | Hspa4l   | heat shock protein 4 like                                           | 118  | 110  | 110  |
| 14828  | Hspa5    | heat shock protein 5                                                | 64   | 54   | 60   |
| 15481  | Hspa8    | heat shock protein 8                                                | 149  | 146  | 158  |
| 15526  | Hspa9    | heat shock protein 9                                                | 264  | 246  | 249  |
| 15507  | Hspb1    | heat shock protein 1                                                | 143  | 146  | 145  |
| 66245  | Hspbp1   | HSPA (heat shock 70kDa) binding protein, cytoplasmic cochaperon     | 39   | 40   | 39   |
| 15510  | Hspd1    | heat shock protein 1 (chaperonin)                                   | 45   | 43   | 45   |
| 15528  | Hspe1    | heat shock protein 1 (chaperonin 10)                                | 57   | 53   | 51   |
| 15505  | Hsph1    | heat shock 105kDa/110kDa protein 1                                  | 198  | 191  | 193  |

|        |         |                                                                |      |      |      |
|--------|---------|----------------------------------------------------------------|------|------|------|
| 53415  | Htati2  | HIV-1 tat interactive protein 2, homolog (human)               | 189  | 181  | 179  |
| 72459  | Htatsf1 | HIV TAT specific factor 1                                      | 49   | 52   | 54   |
| 15550  | Htr1a   | 5-hydroxytryptamine (serotonin) receptor 1A                    | 2065 | 2084 | 2044 |
| 15551  | Htr1b   | 5-hydroxytryptamine (serotonin) receptor 1B                    | 1768 | 1786 | 1734 |
| 15558  | Htr2a   | 5-hydroxytryptamine (serotonin) receptor 2A                    | 1489 | 1481 | 1474 |
| 15559  | Htr2b   | 5-hydroxytryptamine (serotonin) receptor 2B                    | 113  | 115  | 117  |
| 15560  | Htr2c   | 5-hydroxytryptamine (serotonin) receptor 2C                    | 1743 | 1805 | 1639 |
| 56213  | Htra1   | HtrA serine peptidase 1                                        | 210  | 214  | 212  |
| 64704  | Htra2   | HtrA serine peptidase 2                                        | 26   | 29   | 24   |
| 78558  | Htra3   | HtrA serine peptidase 3                                        | 194  | 187  | 176  |
| 15194  | Htt     | huntingtin                                                     | 322  | 333  | 330  |
| 26559  | Hunk    | hormonally upregulated Neu-associated kinase                   | 571  | 578  | 582  |
| 15574  | Hus1    | Hus1 homolog (S. pombe)                                        | 498  | 507  | 487  |
| 59026  | Huwe1   | HECT, UBA and WWE domain containing 1                          | 474  | 482  | 464  |
| 15586  | Hyal1   | hyaluronoglucosaminidase 1                                     | 14   | 15   | 14   |
| 15587  | Hyal2   | hyaluronoglucosaminidase 2                                     | 17   | 17   | 14   |
| 109685 | Hyal3   | hyaluronoglucosaminidase 3                                     | 11   | 9    | 9    |
| 77042  | Hyal4   | hyaluronoglucosaminidase 4                                     | 72   | 71   | 74   |
| 74468  | Hyal5   | hyaluronoglucosaminidase 5                                     | 204  | 204  | 206  |
| 67732  | lah1    | isoamyl acetate-hydrolyzing esterase 1 homolog (S. cerevisiae) | 120  | 116  | 113  |
| 105148 | lars    | isoleucine-tRNA synthetase                                     | 770  | 786  | 777  |
| 381314 | lars2   | isoleucine-tRNA synthetase 2, mitochondrial                    | 21   | 23   | 21   |
| 108837 | lbtk    | inhibitor of Bruton agammaglobulinemia tyrosine kinase         | 667  | 667  | 655  |
| 56542  | lck     | intestinal cell kinase                                         | 112  | 102  | 121  |
| 57295  | lcmt    | isoprenylcysteine carboxyl methyltransferase                   | 33   | 30   | 32   |
| 50723  | lcosl   | icos ligand                                                    | 160  | 156  | 158  |
| 68572  | lct1    | immature colon carcinoma transcript 1                          | 48   | 49   | 47   |
| 15901  | ld1     | inhibitor of DNA binding 1                                     | 82   | 82   | 81   |
| 15902  | ld2     | inhibitor of DNA binding 2                                     | 1843 | 1828 | 1807 |
| 15903  | ld3     | inhibitor of DNA binding 3                                     | 148  | 149  | 151  |
| 15904  | ld4     | inhibitor of DNA binding 4                                     | 631  | 617  | 610  |
| 15925  | lde     | insulin degrading enzyme                                       | 217  | 213  | 223  |
| 15926  | ldh1    | isocitrate dehydrogenase 1 (NADP+), soluble                    | 92   | 94   | 94   |
| 269951 | ldh2    | isocitrate dehydrogenase 2 (NADP+), mitochondrial              | 160  | 161  | 159  |
| 67834  | ldh3a   | isocitrate dehydrogenase 3 (NAD+) alpha                        | 138  | 129  | 129  |
| 170718 | ldh3b   | isocitrate dehydrogenase 3 (NAD+) beta                         | 24   | 25   | 23   |
| 15929  | ldh3g   | isocitrate dehydrogenase 3 (NAD+), gamma                       | 18   | 14   | 17   |
| 319554 | ldi1    | isopentenyl-diphosphate delta isomerase                        | 106  | 107  | 102  |
| 15930  | ldo1    | indoleamine 2,3-dioxygenase 1                                  | 131  | 122  | 118  |
| 209176 | ldo2    | indoleamine 2,3-dioxygenase 2                                  | 200  | 199  | 202  |
| 15931  | lds     | iduronate 2-sulfatase                                          | 292  | 288  | 287  |
| 15932  | ldua    | iduronidase, alpha-L-                                          | 21   | 21   | 20   |
| 15937  | ler3    | immediate early response 3                                     | 169  | 155  | 155  |
| 15951  | lfi204  | interferon activated gene 204                                  | 179  | 171  | 178  |
| 226695 | lfi205  | interferon activated gene 205                                  | 71   | 77   | 72   |
| 65972  | lfi30   | interferon gamma inducible protein 30                          | 19   | 18   | 20   |
| 15975  | lfnar1  | interferon (alpha and beta) receptor 1                         | 183  | 178  | 193  |
| 15977  | lfnb1   | interferon beta 1, fibroblast                                  | 154  | 160  | 157  |
| 15978  | lfng    | interferon gamma                                               | 733  | 745  | 719  |
| 67661  | lft172  | intraflagellar transport 172 homolog (Chlamydomonas)           | 60   | 52   | 56   |
| 245866 | lft52   | intraflagellar transport 52 homolog (Chlamydomonas)            | 92   | 84   | 83   |
| 73916  | lft57   | intraflagellar transport 57 homolog (Chlamydomonas)            | 1006 | 1016 | 991  |
| 21821  | lft88   | intraflagellar transport 88 homolog (Chlamydomonas)            | 154  | 169  | 161  |
| 18518  | lgbp1   | immunoglobulin (CD79A) binding protein 1                       | 130  | 120  | 110  |
| 16000  | lgf1    | insulin-like growth factor 1                                   | 587  | 581  | 577  |

|        |         |                                                                      |      |      |      |
|--------|---------|----------------------------------------------------------------------|------|------|------|
| 16001  | Igf1r   | insulin-like growth factor I receptor                                | 645  | 640  | 623  |
| 16002  | Igf2    | insulin-like growth factor 2                                         | 23   | 29   | 24   |
| 140486 | Igf2bp1 | insulin-like growth factor 2 mRNA binding protein 1                  | 131  | 134  | 132  |
| 16009  | Igfbp3  | insulin-like growth factor binding protein 3                         | 1861 | 1889 | 1834 |
| 16011  | Igfbp5  | insulin-like growth factor binding protein 5                         | 245  | 238  | 255  |
| 20589  | Ighmbp2 | immunoglobulin mu binding protein 2                                  | 717  | 714  | 715  |
| 242050 | Igsf10  | immunoglobulin superfamily, member 10                                | 592  | 594  | 571  |
| 16145  | Igtp    | interferon gamma induced GTPase                                      | 40   | 39   | 40   |
| 16147  | Ihh     | Indian hedgehog                                                      | 171  | 181  | 173  |
| 60440  | Iigp1   | interferon inducible GTPase 1                                        | 267  | 279  | 256  |
| 230233 | Ikbkap  | inhibitor of kappa light polypeptide enhancer in B-cells, kinase com | 81   | 82   | 79   |
| 16150  | Ikbkb   | inhibitor of kappaB kinase beta                                      | 134  | 142  | 127  |
| 56489  | Ikbke   | inhibitor of kappaB kinase epsilon                                   | 358  | 357  | 340  |
| 16151  | Ikbkg   | inhibitor of kappaB kinase gamma                                     | 161  | 150  | 161  |
| 22778  | Ikzf1   | IKAROS family zinc finger 1                                          | 404  | 403  | 413  |
| 22779  | Ikzf2   | IKAROS family zinc finger 2                                          | 916  | 911  | 899  |
| 22780  | Ikzf3   | IKAROS family zinc finger 3                                          | 130  | 131  | 135  |
| 22781  | Ikzf4   | IKAROS family zinc finger 4                                          | 60   | 62   | 62   |
| 67143  | Ikzf5   | IKAROS family zinc finger 5                                          | 51   | 50   | 47   |
| 16153  | Il10    | interleukin 10                                                       | 205  | 215  | 199  |
| 16156  | Il11    | interleukin 11                                                       | 14   | 11   | 11   |
| 16159  | Il12a   | interleukin 12a                                                      | 382  | 386  | 383  |
| 16160  | Il12b   | interleukin 12b                                                      | 843  | 809  | 822  |
| 16161  | Il12rb1 | interleukin 12 receptor, beta 1                                      | 58   | 52   | 62   |
| 16162  | Il12rb2 | interleukin 12 receptor, beta 2                                      | 281  | 292  | 290  |
| 16168  | Il15    | interleukin 15                                                       | 1332 | 1376 | 1342 |
| 16170  | Il16    | interleukin 16                                                       | 210  | 208  | 213  |
| 16171  | Il17a   | interleukin 17A                                                      | 135  | 125  | 136  |
| 257630 | Il17f   | interleukin 17F                                                      | 115  | 114  | 113  |
| 16173  | Il18    | interleukin 18                                                       | 55   | 55   | 54   |
| 329244 | Il19    | interleukin 19                                                       | 129  | 134  | 136  |
| 16175  | Il1a    | interleukin 1 alpha                                                  | 92   | 95   | 93   |
| 16176  | Il1b    | interleukin 1 beta                                                   | 211  | 203  | 203  |
| 16180  | Il1rap  | interleukin 1 receptor accessory protein                             | 581  | 592  | 581  |
| 16181  | Il1rn   | interleukin 1 receptor antagonist                                    | 136  | 134  | 135  |
| 16183  | Il2     | interleukin 2                                                        | 227  | 216  | 210  |
| 60505  | Il21    | interleukin 21                                                       | 236  | 235  | 242  |
| 50929  | Il22    | interleukin 22                                                       | 196  | 202  | 198  |
| 83430  | Il23a   | interleukin 23, alpha subunit p19                                    | 52   | 46   | 41   |
| 93672  | Il24    | interleukin 24                                                       | 57   | 57   | 57   |
| 140806 | Il25    | interleukin 25                                                       | 14   | 12   | 11   |
| 246779 | Il27    | interleukin 27                                                       | 51   | 52   | 53   |
| 16185  | Il2rb   | interleukin 2 receptor, beta chain                                   | 77   | 75   | 76   |
| 16186  | Il2rg   | interleukin 2 receptor, gamma chain                                  | 14   | 12   | 14   |
| 16187  | Il3     | interleukin 3                                                        | 74   | 70   | 70   |
| 77125  | Il33    | interleukin 33                                                       | 271  | 259  | 261  |
| 76527  | Il34    | interleukin 34                                                       | 153  | 154  | 158  |
| 16189  | Il4     | interleukin 4                                                        | 88   | 79   | 89   |
| 14204  | Il4i1   | interleukin 4 induced 1                                              | 39   | 37   | 37   |
| 16191  | Il5     | interleukin 5                                                        | 80   | 86   | 84   |
| 16193  | Il6     | interleukin 6                                                        | 435  | 432  | 438  |
| 16194  | Il6ra   | interleukin 6 receptor, alpha                                        | 163  | 168  | 169  |
| 16195  | Il6st   | interleukin 6 signal transducer                                      | 355  | 387  | 366  |
| 16197  | Il7r    | interleukin 7 receptor                                               | 403  | 407  | 405  |
| 16198  | Il9     | interleukin 9                                                        | 103  | 108  | 101  |

|        |        |                                                                           |      |      |      |
|--------|--------|---------------------------------------------------------------------------|------|------|------|
| 67781  | Ilf2   | interleukin enhancer binding factor 2                                     | 29   | 28   | 34   |
| 16201  | Ilf3   | interleukin enhancer binding factor 3                                     | 99   | 97   | 101  |
| 67444  | Ilkap  | integrin-linked kinase-associated serine/threonine phosphatase 2C         | 53   | 48   | 50   |
| 66541  | Imp1   | IMP1 inner mitochondrial membrane peptidase-like ( <i>S. cerevisiae</i> ) | 132  | 129  | 122  |
| 93757  | Imp2   | IMP2 inner mitochondrial membrane peptidase-like ( <i>S. cerevisiae</i> ) | 1322 | 1333 | 1312 |
| 102462 | Imp3   | IMP3, U3 small nucleolar ribonucleoprotein, homolog (yeast)               | 31   | 28   | 30   |
| 27993  | Imp4   | IMP4, U3 small nucleolar ribonucleoprotein, homolog (yeast)               | 26   | 27   | 21   |
| 55980  | Impa1  | inositol (myo)-1(or 4)-monophosphatase 1                                  | 42   | 43   | 42   |
| 114663 | Impa2  | inositol (myo)-1(or 4)-monophosphatase 2                                  | 127  | 119  | 127  |
| 16210  | Impact | imprinted and ancient                                                     | 81   | 80   | 84   |
| 242291 | Impad1 | inositol monophosphatase domain containing 1                              | 1903 | 1949 | 1906 |
| 23917  | Impdh1 | inosine 5'-phosphate dehydrogenase 1                                      | 115  | 118  | 117  |
| 23918  | Impdh2 | inosine 5'-phosphate dehydrogenase 2                                      | 64   | 63   | 66   |
| 26356  | Ing1   | inhibitor of growth family, member 1                                      | 105  | 96   | 108  |
| 69260  | Ing2   | inhibitor of growth family, member 2                                      | 218  | 230  | 226  |
| 71777  | Ing3   | inhibitor of growth family, member 3                                      | 164  | 167  | 166  |
| 28019  | Ing4   | inhibitor of growth family, member 4                                      | 54   | 50   | 55   |
| 66262  | Ing5   | inhibitor of growth family, member 5                                      | 29   | 27   | 28   |
| 16322  | Inha   | inhibin alpha                                                             | 18   | 20   | 19   |
| 16323  | Inhba  | inhibin beta-A                                                            | 2808 | 2864 | 2738 |
| 16324  | Inhbb  | inhibin beta-B                                                            | 586  | 567  | 587  |
| 21743  | Inmt   | indolethylamine N-methyltransferase                                       | 89   | 90   | 95   |
| 68142  | Ino80  | INO80 homolog ( <i>S. cerevisiae</i> )                                    | 249  | 245  | 246  |
| 70020  | Ino80b | INO80 complex subunit B                                                   | 16   | 20   | 19   |
| 225280 | Ino80c | INO80 complex subunit C                                                   | 242  | 240  | 235  |
| 227195 | Ino80d | INO80 complex subunit D                                                   | 619  | 620  | 621  |
| 16329  | Inpp1  | inositol polyphosphate-1-phosphatase                                      | 148  | 151  | 144  |
| 269180 | Inpp4a | inositol polyphosphate-4-phosphatase, type I                              | 362  | 374  | 363  |
| 234515 | Inpp4b | inositol polyphosphate-4-phosphatase, type II                             | 1737 | 1758 | 1713 |
| 212111 | Inpp5a | inositol polyphosphate-5-phosphatase A                                    | 447  | 430  | 433  |
| 16330  | Inpp5b | inositol polyphosphate-5-phosphatase B                                    | 13   | 16   | 10   |
| 16331  | Inpp5d | inositol polyphosphate-5-phosphatase D                                    | 210  | 203  | 212  |
| 64436  | Inpp5e | inositol polyphosphate-5-phosphatase E                                    | 68   | 62   | 71   |
| 170835 | Inpp5j | inositol polyphosphate 5-phosphatase J                                    | 33   | 31   | 32   |
| 19062  | Inpp5k | inositol polyphosphate 5-phosphatase K                                    | 81   | 83   | 79   |
| 16332  | Inpp1  | inositol polyphosphate phosphatase-like 1                                 | 55   | 53   | 50   |
| 16333  | Ins1   | insulin I                                                                 | 2833 | 2838 | 2778 |
| 16334  | Ins2   | insulin II                                                                | 307  | 319  | 315  |
| 231070 | Insig1 | insulin induced gene 1                                                    | 426  | 415  | 424  |
| 72999  | Insig2 | insulin induced gene 2                                                    | 452  | 456  | 435  |
| 16336  | Insl3  | insulin-like 3                                                            | 28   | 26   | 26   |
| 56856  | Insm2  | insulinoma-associated 2                                                   | 311  | 328  | 310  |
| 16337  | Insr   | insulin receptor                                                          | 799  | 806  | 799  |
| 23920  | Insrr  | insulin receptor-related receptor                                         | 70   | 66   | 64   |
| 68510  | Ints1  | integrator complex subunit 1                                              | 72   | 62   | 71   |
| 70885  | Ints10 | integrator complex subunit 10                                             | 180  | 197  | 198  |
| 71793  | Ints12 | integrator complex subunit 12                                             | 176  | 177  | 177  |
| 70422  | Ints2  | integrator complex subunit 2                                              | 204  | 201  | 202  |
| 229543 | Ints3  | integrator complex subunit 3                                              | 100  | 91   | 100  |
| 101861 | Ints4  | integrator complex subunit 4                                              | 174  | 164  | 164  |
| 109077 | Ints5  | integrator complex subunit 5                                              | 10   | 12   | 10   |
| 18130  | Ints6  | integrator complex subunit 6                                              | 217  | 209  | 215  |
| 77065  | Ints7  | integrator complex subunit 7                                              | 190  | 185  | 196  |
| 72656  | Ints8  | integrator complex subunit 8                                              | 169  | 170  | 170  |
| 210925 | Ints9  | integrator complex subunit 9                                              | 197  | 199  | 192  |

|           |          |                                                              |      |      |      |
|-----------|----------|--------------------------------------------------------------|------|------|------|
| 27399     | Ip6k1    | inositol hexaphosphate kinase 1                              | 68   | 69   | 70   |
| 76500     | Ip6k2    | inositol hexaphosphate kinase 2                              | 152  | 163  | 151  |
| 271424    | Ip6k3    | inositol hexaphosphate kinase 3                              | 89   | 89   | 94   |
| 69718     | lpmk     | inositol polyphosphate multikinase                           | 799  | 829  | 804  |
| 320727    | Ipo8     | importin 8                                                   | 596  | 592  | 584  |
| 75678     | Ippk     | inositol 1,3,4,5,6-pentakisphosphate 2-kinase                | 207  | 200  | 205  |
| 404710    | Iqgap3   | IQ motif containing GTPase activating protein 3              | 91   | 83   | 85   |
| 16179     | Irak1    | interleukin-1 receptor-associated kinase 1                   | 75   | 69   | 65   |
| 65099     | Irak1bp1 | interleukin-1 receptor-associated kinase 1 binding protein 1 | 1395 | 1423 | 1385 |
| 108960    | Irak2    | interleukin-1 receptor-associated kinase 2                   | 98   | 95   | 94   |
| 73914     | Irak3    | interleukin-1 receptor-associated kinase 3                   | 115  | 119  | 123  |
| 266632    | Irak4    | interleukin-1 receptor-associated kinase 4                   | 56   | 58   | 61   |
| 64602     | Ireb2    | iron responsive element binding protein 2                    | 199  | 203  | 204  |
| 16362     | Irf1     | interferon regulatory factor 1                               | 176  | 178  | 170  |
| 16363     | Irf2     | interferon regulatory factor 2                               | 473  | 470  | 467  |
| 272359    | Irf2bp1  | interferon regulatory factor 2 binding protein 1             | 32   | 29   | 34   |
| 270110    | Irf2bp2  | interferon regulatory factor 2 binding protein 2             | 597  | 602  | 586  |
| 54131     | Irf3     | interferon regulatory factor 3                               | 22   | 19   | 22   |
| 16364     | Irf4     | interferon regulatory factor 4                               | 371  | 369  | 365  |
| 27056     | Irf5     | interferon regulatory factor 5                               | 135  | 121  | 127  |
| 54139     | Irf6     | interferon regulatory factor 6                               | 56   | 53   | 53   |
| 54123     | Irf7     | interferon regulatory factor 7                               | 64   | 64   | 63   |
| 15900     | Irf8     | interferon regulatory factor 8                               | 526  | 514  | 530  |
| 16391     | Irf9     | interferon regulatory factor 9                               | 36   | 39   | 34   |
| 16365     | Irg1     | immunoresponse gene 1                                        | 114  | 112  | 108  |
| 15944     | Irgm1    | immunity-related GTPase family M member 1                    | 96   | 104  | 87   |
| 54396     | Irgm2    | immunity-related GTPase family M member 2                    | 146  | 136  | 138  |
| 16367     | Irs1     | insulin receptor substrate 1                                 | 1595 | 1571 | 1561 |
| 384783    | Irs2     | insulin receptor substrate 2                                 | 486  | 493  | 495  |
| 16373     | Irx3     | Iroquois related homeobox 3 (Drosophila)                     | 1344 | 1325 | 1322 |
| 74316     | Isca2    | iron-sulfur cluster assembly 2 homolog (S. cerevisiae)       | 137  | 135  | 142  |
| 66383     | Iscu     | IscU iron-sulfur cluster scaffold homolog (E. coli)          | 37   | 36   | 33   |
| 100038882 | Isg15    | ISG15 ubiquitin-like modifier                                | 21   | 19   | 23   |
| 57444     | Isg20    | interferon-stimulated protein                                | 200  | 194  | 202  |
| 16392     | Isl1     | ISL1 transcription factor, LIM/homeodomain                   | 2405 | 2424 | 2362 |
| 66307     | Isoc1    | isochorismatase domain containing 1                          | 346  | 346  | 354  |
| 664994    | Isoc2a   | isochorismatase domain containing 2a                         | 58   | 62   | 62   |
| 67441     | Isoc2b   | isochorismatase domain containing 2b                         | 40   | 40   | 41   |
| 75847     | Ispd     | isoprenoid synthase domain containing                        | 988  | 1016 | 990  |
| 71597     | Isx      | intestine specific homeobox                                  | 2121 | 2118 | 2091 |
| 57905     | Isy1     | ISY1 splicing factor homolog (S. cerevisiae)                 | 54   | 48   | 49   |
| 71780     | Isyna1   | myo-inositol 1-phosphate synthase A1                         | 83   | 75   | 86   |
| 16396     | Itch     | itchy, E3 ubiquitin protein ligase                           | 214  | 217  | 219  |
| 109700    | Itga1    | integrin alpha 1                                             | 1520 | 1522 | 1498 |
| 16398     | Itga2    | integrin alpha 2                                             | 344  | 363  | 344  |
| 16400     | Itga3    | integrin alpha 3                                             | 97   | 104  | 104  |
| 16402     | Itga5    | integrin alpha 5 (fibronectin receptor alpha)                | 110  | 114  | 119  |
| 16403     | Itga6    | integrin alpha 6                                             | 199  | 204  | 192  |
| 16410     | Itgav    | integrin alpha V                                             | 208  | 214  | 218  |
| 16412     | Itgb1    | integrin beta 1 (fibronectin receptor beta)                  | 916  | 923  | 907  |
| 69564     | Itgb1bp3 | integrin beta 1 binding protein 3                            | 46   | 47   | 44   |
| 16416     | Itgb3    | integrin beta 3                                              | 677  | 688  | 680  |
| 67733     | Itgb3bp  | integrin beta 3 binding protein (beta3-endonexin)            | 142  | 145  | 139  |
| 320910    | Itgb8    | integrin beta 8                                              | 622  | 616  | 587  |
| 16424     | Itih1    | inter-alpha trypsin inhibitor, heavy chain 1                 | 37   | 37   | 36   |

|        |          |                                                                         |      |      |      |
|--------|----------|-------------------------------------------------------------------------|------|------|------|
| 16425  | Itih2    | inter-alpha trypsin inhibitor, heavy chain 2                            | 95   | 98   | 97   |
| 16426  | Itih3    | inter-alpha trypsin inhibitor, heavy chain 3                            | 81   | 78   | 75   |
| 209378 | Itih5    | inter-alpha (globulin) inhibitor H5                                     | 315  | 320  | 319  |
| 16428  | Itk      | IL2-inducible T-cell kinase                                             | 118  | 121  | 109  |
| 16429  | Itln1    | intelectin 1 (galactofuranose binding)                                  | 68   | 71   | 69   |
| 16434  | Itpa     | inosine triphosphatase (nucleoside triphosphate pyrophosphatase)        | 36   | 40   | 43   |
| 217837 | Itpk1    | inositol 1,3,4-triphosphate 5/6 kinase                                  | 71   | 76   | 68   |
| 228550 | Itpka    | inositol 1,4,5-triphosphate 3-kinase A                                  | 105  | 107  | 107  |
| 320404 | Itpkb    | inositol 1,4,5-triphosphate 3-kinase B                                  | 97   | 100  | 89   |
| 233011 | Itpkc    | inositol 1,4,5-triphosphate 3-kinase C                                  | 49   | 44   | 45   |
| 56357  | Ivd      | isovaleryl coenzyme A dehydrogenase                                     | 121  | 114  | 123  |
| 16447  | Ivl      | involucrin                                                              | 111  | 107  | 110  |
| 73473  | Iws1     | IWS1 homolog ( <i>S. cerevisiae</i> )                                   | 128  | 128  | 129  |
| 70337  | Iyd      | iodotyrosine deiodinase                                                 | 484  | 489  | 470  |
| 16451  | Jak1     | Janus kinase 1                                                          | 351  | 374  | 353  |
| 16452  | Jak2     | Janus kinase 2                                                          | 239  | 235  | 247  |
| 16453  | Jak3     | Janus kinase 3                                                          | 16   | 20   | 18   |
| 16468  | Jarid2   | jumonji, AT rich interactive domain 2                                   | 1560 | 1570 | 1594 |
| 231986 | Jazf1    | JAZF zinc finger 1                                                      | 946  | 957  | 948  |
| 81703  | Jdp2     | Jun dimerization protein 2                                              | 275  | 279  | 279  |
| 338523 | Jhdm1d   | jumonji C domain-containing histone demethylase 1 homolog D ( <i>S.</i> | 348  | 330  | 333  |
| 104771 | Jkamp    | JNK1/MAPK8-associated membrane protein                                  | 127  | 122  | 123  |
| 108829 | Jmjd1c   | jumonji domain containing 1C                                            | 236  | 244  | 236  |
| 77035  | Jmjd5    | jumonji domain containing 5                                             | 152  | 169  | 153  |
| 107817 | Jmjd6    | jumonji domain containing 6                                             | 22   | 20   | 20   |
| 57748  | Jmy      | junction-mediating and regulatory protein                               | 428  | 430  | 419  |
| 74158  | Josd1    | Josephin domain containing 1                                            | 25   | 28   | 27   |
| 66124  | Josd2    | Josephin domain containing 2                                            | 35   | 34   | 30   |
| 16475  | Jub      | ajuba                                                                   | 68   | 67   | 63   |
| 16476  | Jun      | Jun oncogene                                                            | 728  | 737  | 738  |
| 16477  | Junb     | Jun-B oncogene                                                          | 22   | 20   | 24   |
| 16478  | Jund     | Jun proto-oncogene related gene d                                       | 50   | 50   | 44   |
| 16480  | Jup      | junction plakoglobin                                                    | 71   | 72   | 76   |
| 545156 | Kalrn    | kalirin, RhoGEF kinase                                                  | 873  | 872  | 875  |
| 85305  | Kars     | lysyl-tRNA synthetase                                                   | 23   | 24   | 24   |
| 14534  | Kat2a    | K(lysine) acetyltransferase 2A                                          | 11   | 11   | 10   |
| 18519  | Kat2b    | K(lysine) acetyltransferase 2B                                          | 209  | 219  | 218  |
| 81601  | Kat5     | K(lysine) acetyltransferase 5                                           | 48   | 46   | 43   |
| 23924  | Katna1   | katanin p60 (ATPase-containing) subunit A1                              | 122  | 132  | 131  |
| 74287  | Kcmf1    | potassium channel modulatory factor 1                                   | 226  | 223  | 210  |
| 16510  | Kcnh1    | potassium voltage-gated channel, subfamily H (eag-related), memt        | 809  | 807  | 842  |
| 238271 | Kcnh5    | potassium voltage-gated channel, subfamily H (eag-related), memt        | 1294 | 1305 | 1255 |
| 211468 | Kcnh8    | potassium voltage-gated channel, subfamily H (eag-related), memt        | 2081 | 2091 | 2047 |
| 56461  | Kcnip3   | Kv channel interacting protein 3, calsenilin                            | 172  | 162  | 171  |
| 16514  | Kcnj11   | potassium inwardly rectifying channel, subfamily J, member 11           | 191  | 188  | 179  |
| 16522  | Kcnj6    | potassium inwardly-rectifying channel, subfamily J, member 6            | 1058 | 1062 | 1025 |
| 16535  | Kcnq1    | potassium voltage-gated channel, subfamily Q, member 1                  | 259  | 255  | 265  |
| 63830  | Kcnq1ot1 | KCNQ1 overlapping transcript 1                                          | 453  | 454  | 431  |
| 106931 | Kctd1    | potassium channel tetramerisation domain containing 1                   | 890  | 907  | 888  |
| 233877 | Kctd13   | potassium channel tetramerisation domain containing 13                  | 67   | 62   | 65   |
| 99982  | Kdm1a    | lysine (K)-specific demethylase 1A                                      | 178  | 191  | 181  |
| 218214 | Kdm1b    | lysine (K)-specific demethylase 1B                                      | 81   | 76   | 85   |
| 225876 | Kdm2a    | lysine (K)-specific demethylase 2A                                      | 172  | 172  | 170  |
| 30841  | Kdm2b    | lysine (K)-specific demethylase 2B                                      | 325  | 320  | 321  |
| 104263 | Kdm3a    | lysine (K)-specific demethylase 3A                                      | 214  | 207  | 209  |

|           |         |                                                                  |      |      |      |
|-----------|---------|------------------------------------------------------------------|------|------|------|
| 277250    | Kdm3b   | KDM3B lysine (K)-specific demethylase 3B                         | 107  | 99   | 105  |
| 230674    | Kdm4a   | lysine (K)-specific demethylase 4A                               | 211  | 199  | 200  |
| 193796    | Kdm4b   | lysine (K)-specific demethylase 4B                               | 216  | 217  | 208  |
| 76804     | Kdm4c   | lysine (K)-specific demethylase 4C                               | 1627 | 1647 | 1607 |
| 244694    | Kdm4d   | lysine (K)-specific demethylase 4D                               | 156  | 158  | 154  |
| 214899    | Kdm5a   | lysine (K)-specific demethylase 5A                               | 136  | 130  | 129  |
| 75605     | Kdm5b   | lysine (K)-specific demethylase 5B                               | 117  | 123  | 127  |
| 20591     | Kdm5c   | lysine (K)-specific demethylase 5C                               | 201  | 186  | 193  |
| 20592     | Kdm5d   | lysine (K)-specific demethylase 5D                               | 230  | 226  | 216  |
| 22289     | Kdm6a   | 4lysine (K)-specific demethylase 6A                              | 349  | 356  | 311  |
| 216850    | Kdm6b   | KDM1 lysine (K)-specific demethylase 6B                          | 180  | 185  | 194  |
| 16542     | Kdr     | kinase insert domain protein receptor                            | 763  | 789  | 763  |
| 70750     | Kdsr    | 3-ketodihydrosphingosine reductase                               | 109  | 110  | 104  |
| 50868     | Keap1   | kelch-like ECH-associated protein 1                              | 62   | 64   | 61   |
| 23925     | Kel     | Kell blood group                                                 | 109  | 114  | 107  |
| 20218     | Khdrbs1 | KH domain containing, RNA binding, signal transduction associate | 163  | 167  | 161  |
| 170771    | Khdrbs2 | KH domain containing, RNA binding, signal transduction associate | 1567 | 1593 | 1533 |
| 13992     | Khdrbs3 | KH domain containing, RNA binding, signal transduction associate | 4263 | 4352 | 4255 |
| 16548     | Khk     | ketohehexokinase                                                 | 41   | 39   | 38   |
| 16549     | Khsrp   | KH-type splicing regulatory protein                              | 37   | 35   | 30   |
| 16558     | Kif16b  | kinesin family member 16B                                        | 3065 | 3067 | 3069 |
| 16559     | Kif17   | kinesin family member 17                                         | 66   | 68   | 68   |
| 16561     | Kif1b   | kinesin family member 1B                                         | 338  | 338  | 331  |
| 240641    | Kif20b  | kinesin family member 20B                                        | 1484 | 1494 | 1507 |
| 110033    | Kif22   | kinesin family member 22                                         | 38   | 32   | 33   |
| 16572     | Kif5a   | kinesin family member 5A                                         | 78   | 73   | 70   |
| 16573     | Kif5b   | kinesin family member 5B                                         | 472  | 458  | 467  |
| 16574     | Kif5c   | kinesin family member 5C                                         | 437  | 428  | 439  |
| 100042970 | Kifc1   | kinesin family member C1                                         | 85   | 82   | 83   |
| 16582     | Kifc3   | kinesin family member C3                                         | 337  | 323  | 329  |
| 16588     | Kin     | antigenic determinant of rec-A protein                           | 68   | 60   | 60   |
| 114229    | Kiss1r  | KISS1 receptor                                                   | 8    | 9    | 8    |
| 16590     | Kit     | kit oncogene                                                     | 1077 | 1078 | 1059 |
| 17311     | Kitl    | kit ligand                                                       | 733  | 737  | 726  |
| 16591     | Kl      | klotho                                                           | 670  | 665  | 670  |
| 83379     | Klb     | klotho beta                                                      | 70   | 83   | 76   |
| 232943    | Klc3    | kinesin light chain 3                                            | 34   | 30   | 31   |
| 16596     | Klf1    | Kruppel-like factor 1 (erythroid)                                | 15   | 16   | 17   |
| 21847     | Klf10   | Kruppel-like factor 10                                           | 383  | 395  | 383  |
| 194655    | Klf11   | Kruppel-like factor 11                                           | 122  | 129  | 134  |
| 16597     | Klf12   | Kruppel-like factor 12                                           | 2413 | 2414 | 2368 |
| 50794     | Klf13   | Kruppel-like factor 13                                           | 905  | 892  | 907  |
| 619665    | Klf14   | Kruppel-like factor 14                                           | 184  | 186  | 170  |
| 66277     | Klf15   | Kruppel-like factor 15                                           | 156  | 144  | 156  |
| 118445    | Klf16   | Kruppel-like factor 16                                           | 31   | 30   | 30   |
| 75753     | Klf17   | Kruppel-like factor 17                                           | 207  | 204  | 198  |
| 16598     | Klf2    | Kruppel-like factor 2 (lung)                                     | 232  | 232  | 239  |
| 16599     | Klf3    | Kruppel-like factor 3 (basic)                                    | 985  | 988  | 977  |
| 16600     | Klf4    | Kruppel-like factor 4 (gut)                                      | 1777 | 1800 | 1792 |
| 12224     | Klf5    | Kruppel-like factor 5                                            | 1355 | 1364 | 1345 |
| 23849     | Klf6    | Kruppel-like factor 6                                            | 2467 | 2511 | 2435 |
| 93691     | Klf7    | Kruppel-like factor 7 (ubiquitous)                               | 721  | 736  | 731  |
| 245671    | Klf8    | Kruppel-like factor 8                                            | 445  | 437  | 421  |
| 67455     | Klh13   | kelch-like 13 (Drosophila)                                       | 1502 | 1479 | 1419 |
| 226541    | Klh20   | kelch-like 20 (Drosophila)                                       | 89   | 91   | 93   |

|        |         |                                                                    |      |      |      |
|--------|---------|--------------------------------------------------------------------|------|------|------|
| 242785 | Klh21   | kelch-like 21 (Drosophila)                                         | 40   | 36   | 41   |
| 244923 | Klh31   | kelch-like 31 (Drosophila)                                         | 270  | 263  | 269  |
| 242521 | Klh9    | kelch-like 9 (Drosophila)                                          | 72   | 80   | 78   |
| 16612  | Klk1    | kallikrein 1                                                       | 25   | 25   | 20   |
| 56538  | Klk11   | kallikrein related-peptidase 11                                    | 18   | 16   | 16   |
| 69511  | Klk12   | kallikrein related-peptidase 12                                    | 76   | 76   | 80   |
| 626834 | Klk13   | kallikrein related-peptidase 13                                    | 97   | 101  | 109  |
| 317653 | Klk14   | kallikrein related-peptidase 14                                    | 51   | 53   | 50   |
| 317652 | Klk15   | kallikrein related-peptidase 15                                    | 83   | 84   | 83   |
| 16623  | Klk1b1  | kallikrein 1-related peptidase b1                                  | 31   | 31   | 36   |
| 16613  | Klk1b11 | kallikrein 1-related peptidase b11                                 | 44   | 52   | 48   |
| 16615  | Klk1b16 | kallikrein 1-related peptidase b16                                 | 99   | 98   | 96   |
| 16616  | Klk1b21 | kallikrein 1-related peptidase b21                                 | 76   | 80   | 79   |
| 13646  | Klk1b22 | kallikrein 1-related peptidase b22                                 | 46   | 47   | 47   |
| 16617  | Klk1b24 | kallikrein 1-related peptidase b24                                 | 78   | 85   | 81   |
| 16618  | Klk1b26 | kallikrein 1-related peptidase b26                                 | 22   | 22   | 21   |
| 16619  | Klk1b27 | kallikrein 1-related peptidase b27                                 | 112  | 112  | 111  |
| 18050  | Klk1b3  | kallikrein 1-related peptidase b3                                  | 21   | 25   | 21   |
| 18048  | Klk1b4  | kallikrein 1-related peptidase b4                                  | 21   | 21   | 20   |
| 16622  | Klk1b5  | kallikrein 1-related peptidase b5                                  | 24   | 27   | 24   |
| 16624  | Klk1b8  | kallikrein 1-related peptidase b8                                  | 27   | 27   | 27   |
| 13648  | Klk1b9  | kallikrein 1-related peptidase b9                                  | 41   | 37   | 37   |
| 56640  | Klk4    | kallikrein related-peptidase 4 (prostase, enamel matrix, prostate) | 121  | 117  | 116  |
| 68668  | Klk5    | kallikrein related-peptidase 5                                     | 72   | 73   | 69   |
| 19144  | Klk6    | kallikrein related-peptidase 6                                     | 43   | 40   | 44   |
| 23993  | Klk7    | kallikrein related-peptidase 7 (chymotryptic, stratum corneum)     | 36   | 32   | 35   |
| 259277 | Klk8    | kallikrein related-peptidase 8                                     | 26   | 23   | 25   |
| 101533 | Klk9    | kallikrein related-peptidase 9                                     | 23   | 20   | 21   |
| 16621  | Klkb1   | kallikrein B, plasma 1                                             | 91   | 97   | 89   |
| 98256  | Kmo     | kynurenine 3-monooxygenase (kynurenine 3-hydroxylase)              | 83   | 86   | 81   |
| 76484  | Kndc1   | kinase non-catalytic C-lobe domain (KIND) containing 1             | 143  | 141  | 141  |
| 16644  | Kng1    | kininogen 1                                                        | 105  | 108  | 103  |
| 433619 | Kprp    | keratinocyte expressed, proline-rich                               | 92   | 92   | 92   |
| 16653  | Kras    | v-Ki-ras2 Kirsten rat sarcoma viral oncogene homolog               | 228  | 223  | 223  |
| 52705  | Krr1    | KRR1, small subunit (SSU) processome component, homolog (yea       | 622  | 633  | 614  |
| 16678  | Krt1    | keratin 1                                                          | 64   | 59   | 60   |
| 16667  | Krt17   | keratin 17                                                         | 26   | 24   | 27   |
| 110310 | Krt7    | keratin 7                                                          | 86   | 83   | 90   |
| 66059  | Krtcap2 | keratinocyte associated protein 2                                  | 30   | 25   | 25   |
| 16706  | Ksr1    | kinase suppressor of ras 1                                         | 340  | 329  | 349  |
| 333050 | Ksr2    | kinase suppressor of ras 2                                         | 618  | 610  | 630  |
| 70789  | Kynu    | kynureninase (L-kynurenine hydrolase)                              | 1395 | 1399 | 1368 |
| 217666 | L2hgdh  | L-2-hydroxyglutarate dehydrogenase                                 | 53   | 53   | 57   |
| 241764 | L3mbtl1 | l(3)mbt-like (Drosophila)                                          | 71   | 74   | 69   |
| 214669 | L3mbtl2 | l(3)mbt-like 2 (Drosophila)                                        | 150  | 151  | 143  |
| 237339 | L3mbtl3 | l(3)mbt-like 3 (Drosophila)                                        | 566  | 567  | 541  |
| 320858 | L3mbtl4 | l(3)mbt-like 4 (Drosophila)                                        | 1476 | 1496 | 1465 |
| 16768  | Lag3    | lymphocyte-activation gene 3                                       | 39   | 37   | 34   |
| 16770  | Lalba   | lactalbumin, alpha                                                 | 54   | 57   | 55   |
| 83409  | Lamtor2 | late endosomal/lysosomal adaptor, MAPK and MTOR activator 2        | 5    | 6    | 5    |
| 56692  | Lamtor3 | late endosomal/lysosomal adaptor, MAPK and MTOR activator 3        | 143  | 154  | 152  |
| 71835  | Lancl2  | LanC (bacterial lantibiotic synthetase component C)-like 2         | 169  | 174  | 163  |
| 100470 | Lao1    | L-amino acid oxidase 1                                             | 227  | 229  | 230  |
| 66988  | Lap3    | leucine aminopeptidase 3                                           | 83   | 84   | 81   |
| 16795  | Large   | like-glycosyltransferase                                           | 2674 | 2687 | 2682 |

|        |         |                                                                |      |      |      |
|--------|---------|----------------------------------------------------------------|------|------|------|
| 67557  | Larp6   | La ribonucleoprotein domain family, member 6                   | 142  | 135  | 138  |
| 28036  | Larp7   | La ribonucleoprotein domain family, member 7                   | 9    | 10   | 9    |
| 107045 | Lars    | leucyl-tRNA synthetase                                         | 100  | 99   | 104  |
| 102436 | Lars2   | leucyl-tRNA synthetase, mitochondrial                          | 287  | 277  | 281  |
| 93898  | Lass1   | LAG1 homolog, ceramide synthase 1                              | 17   | 19   | 17   |
| 76893  | Lass2   | LAG1 homolog, ceramide synthase 2                              | 61   | 65   | 64   |
| 545975 | Lass3   | LAG1 homolog, ceramide synthase 3                              | 197  | 198  | 192  |
| 67260  | Lass4   | LAG1 homolog, ceramide synthase 4                              | 330  | 334  | 340  |
| 71949  | Lass5   | LAG1 homolog, ceramide synthase 5                              | 120  | 125  | 121  |
| 241447 | Lass6   | LAG1 homolog, ceramide synthase 6                              | 614  | 620  | 610  |
| 16797  | Lat     | linker for activation of T cells                               | 135  | 143  | 137  |
| 16798  | Lats1   | large tumor suppressor                                         | 57   | 58   | 51   |
| 50523  | Lats2   | large tumor suppressor 2                                       | 194  | 189  | 188  |
| 77889  | Lbh     | limb-bud and heart                                             | 355  | 342  | 337  |
| 16803  | Lbp     | lipopolysaccharide binding protein                             | 135  | 138  | 135  |
| 98386  | Lbr     | lamin B receptor                                               | 661  | 657  | 656  |
| 16814  | Lbx1    | ladybird homeobox homolog 1 (Drosophila)                       | 261  | 271  | 269  |
| 16815  | Lbx2    | ladybird homeobox homolog 2 (Drosophila)                       | 30   | 28   | 29   |
| 16816  | Lcat    | lecithin cholesterol acyltransferase                           | 33   | 37   | 32   |
| 16818  | Lck     | lymphocyte protein tyrosine kinase                             | 67   | 62   | 66   |
| 225010 | Lclat1  | lysocardiolipin acyltransferase 1                              | 628  | 620  | 622  |
| 30949  | Lcmt1   | leucine carboxyl methyltransferase 1                           | 119  | 121  | 120  |
| 329504 | Lcmt2   | leucine carboxyl methyltransferase 2                           | 45   | 38   | 37   |
| 16819  | Lcn2    | lipocalin 2                                                    | 18   | 18   | 18   |
| 13863  | Lcn5    | lipocalin 5                                                    | 31   | 27   | 26   |
| 212391 | Lcor    | ligand dependent nuclear receptor corepressor                  | 464  | 464  | 462  |
| 209707 | Lcorl   | ligand dependent nuclear receptor corepressor-like             | 2839 | 2852 | 2831 |
| 226413 | Lct     | lactase                                                        | 150  | 148  | 145  |
| 235435 | Lctl    | lactase-like                                                   | 204  | 199  | 204  |
| 16825  | Ldb1    | LIM domain binding 1                                           | 69   | 70   | 69   |
| 16826  | Ldb2    | LIM domain binding 2                                           | 1590 | 1573 | 1530 |
| 16828  | Ldha    | lactate dehydrogenase A                                        | 84   | 83   | 86   |
| 106557 | Ldhal6b | lactate dehydrogenase A-like 6B                                | 567  | 571  | 572  |
| 16832  | Ldhb    | lactate dehydrogenase B                                        | 133  | 129  | 126  |
| 16833  | Ldhc    | lactate dehydrogenase C                                        | 95   | 97   | 91   |
| 52815  | Ldhd    | lactate dehydrogenase D                                        | 127  | 137  | 144  |
| 16835  | Ldlr    | low density lipoprotein receptor                               | 190  | 185  | 188  |
| 100017 | Ldlrap1 | low density lipoprotein receptor adaptor protein 1             | 188  | 185  | 191  |
| 16842  | Lef1    | lymphoid enhancer binding factor 1                             | 727  | 694  | 714  |
| 13590  | Lefty1  | left right determination factor 1                              | 47   | 49   | 53   |
| 235497 | Leo1    | Leo1, Paf1/RNA polymerase II complex component, homolog (S. c  | 201  | 195  | 198  |
| 16846  | Lep     | leptin                                                         | 185  | 184  | 188  |
| 16847  | Lepr    | leptin receptor                                                | 251  | 252  | 249  |
| 56401  | Lepre1  | leprecan 1                                                     | 35   | 29   | 33   |
| 210530 | Leprel1 | leprecan-like 1                                                | 734  | 727  | 721  |
| 14789  | Leprel2 | leprecan-like 2                                                | 27   | 29   | 30   |
| 19141  | Lgmn    | legumain                                                       | 237  | 240  | 241  |
| 107515 | Lgr4    | leucine-rich repeat-containing G protein-coupled receptor 4    | 130  | 138  | 130  |
| 266744 | Lgsn    | lengsin, lens protein with glutamine synthetase domain         | 344  | 334  | 335  |
| 76429  | Lhpp    | phospholysine phosphohistidine inorganic pyrophosphate phospho | 236  | 238  | 234  |
| 16869  | Lhx1    | LIM homeobox protein 1                                         | 14   | 10   | 12   |
| 16870  | Lhx2    | LIM homeobox protein 2                                         | 288  | 279  | 294  |
| 16871  | Lhx3    | LIM homeobox protein 3                                         | 137  | 141  | 148  |
| 16872  | Lhx4    | LIM homeobox protein 4                                         | 319  | 326  | 312  |
| 16873  | Lhx5    | LIM homeobox protein 5                                         | 441  | 441  | 444  |

|        |        |                                                   |      |      |      |
|--------|--------|---------------------------------------------------|------|------|------|
| 16874  | Lhx6   | LIM homeobox protein 6                            | 108  | 115  | 115  |
| 16875  | Lhx8   | LIM homeobox protein 8                            | 783  | 798  | 798  |
| 79464  | Lias   | lipoic acid synthetase                            | 65   | 56   | 56   |
| 16878  | Lif    | leukemia inhibitory factor                        | 278  | 271  | 272  |
| 16881  | Lig1   | ligase I, DNA, ATP-dependent                      | 133  | 133  | 133  |
| 16882  | Lig3   | ligase III, DNA, ATP-dependent                    | 82   | 83   | 81   |
| 319583 | Lig4   | ligase IV, DNA, ATP-dependent                     | 254  | 274  | 264  |
| 29806  | Limd1  | LIM domains containing 1                          | 213  | 208  | 202  |
| 16885  | Limk1  | LIM-domain containing, protein kinase             | 142  | 142  | 141  |
| 16886  | Limk2  | LIM motif-containing protein kinase 2             | 227  | 223  | 222  |
| 110829 | Lims1  | LIM and senescent cell antigen-like domains 1     | 332  | 353  | 336  |
| 83557  | Lin28a | lin-28 homolog A (C. elegans)                     | 85   | 87   | 87   |
| 380669 | Lin28b | lin-28 homolog B (C. elegans)                     | 316  | 300  | 307  |
| 231506 | Lin54  | lin-54 homolog (C. elegans)                       | 120  | 118  | 122  |
| 72568  | Lin9   | lin-9 homolog (C. elegans)                        | 163  | 161  | 161  |
| 16889  | Lipa   | lysosomal acid lipase A                           | 101  | 97   | 94   |
| 15450  | Lipc   | lipase, hepatic                                   | 618  | 639  | 621  |
| 16890  | Lipe   | lipase, hormone sensitive                         | 60   | 52   | 55   |
| 67717  | Lipf   | lipase, gastric                                   | 534  | 541  | 526  |
| 16891  | Lipg   | lipase, endothelial                               | 291  | 275  | 264  |
| 239759 | Liph   | lipase, member H                                  | 79   | 82   | 81   |
| 320355 | Lipi   | lipase, member I                                  | 1474 | 1525 | 1456 |
| 240633 | Lipk   | lipase, family member K                           | 135  | 133  | 127  |
| 78753  | Lipm   | lipase, family member M                           | 129  | 136  | 125  |
| 70166  | Lipn   | lipase, family member N                           | 113  | 120  | 112  |
| 623661 | Lipt1  | lipoyltransferase 1                               | 34   | 35   | 33   |
| 67164  | Lipt2  | lipoyl(octanoyl) transferase 2 (putative)         | 69   | 69   | 76   |
| 56722  | Litaf  | LPS-induced TN factor                             | 295  | 286  | 301  |
| 30937  | Lmcd1  | LIM and cysteine-rich domains 1                   | 231  | 225  | 230  |
| 76483  | Lmf1   | lipase maturation factor 1                        | 187  | 185  | 189  |
| 239833 | Lmln   | leishmanolysin-like (metallopeptidase M8 family)  | 60   | 64   | 67   |
| 109594 | Lmo1   | LIM domain only 1                                 | 456  | 443  | 461  |
| 16909  | Lmo2   | LIM domain only 2                                 | 310  | 328  | 310  |
| 109593 | Lmo3   | LIM domain only 3                                 | 661  | 669  | 660  |
| 16911  | Lmo4   | LIM domain only 4                                 | 2175 | 2188 | 2125 |
| 231876 | Lmtk2  | lemur tyrosine kinase 2                           | 181  | 175  | 183  |
| 381983 | Lmtk3  | lemur tyrosine kinase 3                           | 58   | 60   | 55   |
| 110648 | Lmx1a  | LIM homeobox transcription factor 1 alpha         | 1042 | 1069 | 1030 |
| 16917  | Lmx1b  | LIM homeobox transcription factor 1 beta          | 531  | 518  | 506  |
| 240028 | Lnpep  | leucyl/cystinyl aminopeptidase                    | 387  | 385  | 362  |
| 16924  | Lnx1   | ligand of numb-protein X 1                        | 688  | 687  | 694  |
| 74142  | Lonp1  | lon peptidase 1, mitochondrial                    | 20   | 19   | 18   |
| 66887  | Lonp2  | lon peptidase 2, peroxisomal                      | 275  | 267  | 264  |
| 74365  | Lonrf3 | LON peptidase N-terminal domain and ring finger 3 | 511  | 490  | 481  |
| 16939  | Lor    | loricrin                                          | 140  | 139  | 135  |
| 16948  | Lox    | lysyl oxidase                                     | 191  | 194  | 178  |
| 16949  | Loxl1  | lysyl oxidase-like 1                              | 150  | 147  | 146  |
| 94352  | Loxl2  | lysyl oxidase-like 2                              | 197  | 195  | 193  |
| 16950  | Loxl3  | lysyl oxidase-like 3                              | 26   | 29   | 31   |
| 67573  | Loxl4  | lysyl oxidase-like 4                              | 298  | 300  | 302  |
| 14745  | Lpar1  | lysophosphatidic acid receptor 1                  | 440  | 431  | 425  |
| 53978  | Lpar2  | lysophosphatidic acid receptor 2                  | 34   | 27   | 29   |
| 65086  | Lpar3  | lysophosphatidic acid receptor 3                  | 290  | 299  | 303  |
| 210992 | Lpcat1 | lysophosphatidylcholine acyltransferase 1         | 253  | 265  | 254  |
| 270084 | Lpcat2 | lysophosphatidylcholine acyltransferase 2         | 100  | 98   | 96   |

|        |         |                                                                        |      |      |      |
|--------|---------|------------------------------------------------------------------------|------|------|------|
| 70902  | Lpcat2b | lysophosphatidylcholine acyltransferase 2B                             | 124  | 118  | 124  |
| 14792  | Lpcat3  | lysophosphatidylcholine acyltransferase 3                              | 102  | 102  | 102  |
| 99010  | Lpcat4  | lysophosphatidylcholine acyltransferase 4                              | 132  | 125  | 130  |
| 226856 | Lpgat1  | lysophosphatidylglycerol acyltransferase 1                             | 304  | 322  | 314  |
| 14245  | Lpin1   | lipin 1                                                                | 1064 | 1090 | 1067 |
| 64898  | Lpin2   | lipin 2                                                                | 402  | 404  | 385  |
| 64899  | Lpin3   | lipin 3                                                                | 66   | 64   | 66   |
| 16956  | Lpl     | lipoprotein lipase                                                     | 371  | 368  | 371  |
| 76113  | Lpo     | lactoperoxidase                                                        | 78   | 74   | 80   |
| 79235  | Lrat    | lecithin-retinol acyltransferase (phosphatidylcholine-retinol-O-acyltr | 174  | 178  | 172  |
| 231798 | Lrch4   | leucine-rich repeats and calponin homology (CH) domain containin       | 5    | 3    | 3    |
| 74354  | Lrguk   | leucine-rich repeats and guanylate kinase domain containing            | 1178 | 1196 | 1174 |
| 65107  | Lrp10   | low-density lipoprotein receptor-related protein 10                    | 52   | 55   | 59   |
| 14725  | Lrp2    | low density lipoprotein receptor-related protein 2                     | 345  | 352  | 352  |
| 16973  | Lrp5    | low density lipoprotein receptor-related protein 5                     | 167  | 163  | 167  |
| 16974  | Lrp6    | low density lipoprotein receptor-related protein 6                     | 302  | 304  | 289  |
| 72416  | Lrpprc  | leucine-rich PPR-motif containing                                      | 345  | 359  | 348  |
| 68732  | Lrrc16a | leucine rich repeat containing 16A                                     | 442  | 448  | 419  |
| 434215 | Lrrc32  | leucine rich repeat containing 32                                      | 275  | 268  | 284  |
| 72946  | Lrrc47  | leucine rich repeat containing 47                                      | 60   | 61   | 63   |
| 16978  | Lrrfip1 | leucine rich repeat (in FLII) interacting protein 1                    | 290  | 290  | 285  |
| 233328 | Lrrk1   | leucine-rich repeat kinase 1                                           | 406  | 402  | 402  |
| 66725  | Lrrk2   | leucine-rich repeat kinase 2                                           | 332  | 342  | 328  |
| 16981  | Lrrn3   | leucine rich repeat protein 3, neuronal                                | 3560 | 3513 | 3485 |
| 227738 | Lrsam1  | leucine rich repeat and sterile alpha motif containing 1               | 113  | 100  | 108  |
| 71735  | Lrwd1   | leucine-rich repeats and WD repeat domain containing 1                 | 26   | 27   | 28   |
| 67207  | Lsm1    | LSM1 homolog, U6 small nuclear RNA associated (S. cerevisiae)          | 32   | 33   | 34   |
| 116748 | Lsm10   | U7 snRNP-specific Sm-like protein LSM10                                | 61   | 61   | 65   |
| 72290  | Lsm11   | U7 snRNP-specific Sm-like protein LSM11                                | 137  | 134  | 135  |
| 27756  | Lsm2    | LSM2 homolog, U6 small nuclear RNA associated (S. cerevisiae)          | 36   | 35   | 34   |
| 67678  | Lsm3    | LSM3 homolog, U6 small nuclear RNA associated (S. cerevisiae)          | 230  | 211  | 218  |
| 50783  | Lsm4    | LSM4 homolog, U6 small nuclear RNA associated (S. cerevisiae)          | 49   | 45   | 41   |
| 66373  | Lsm5    | LSM5 homolog, U6 small nuclear RNA associated (S. cerevisiae)          | 436  | 436  | 430  |
| 78651  | Lsm6    | LSM6 homolog, U6 small nuclear RNA associated (S. cerevisiae)          | 663  | 665  | 672  |
| 66094  | Lsm7    | LSM7 homolog, U6 small nuclear RNA associated (S. cerevisiae)          | 13   | 15   | 11   |
| 16987  | Lss     | lanosterol synthase                                                    | 121  | 114  | 116  |
| 16993  | Lta4h   | leukotriene A4 hydrolase                                               | 186  | 194  | 193  |
| 16994  | Ltb     | lymphotoxin B                                                          | 16   | 14   | 14   |
| 17001  | Ltc4s   | leukotriene C4 synthase                                                | 90   | 83   | 90   |
| 17002  | Ltf     | lactotransferrin                                                       | 85   | 90   | 86   |
| 17005  | Ltk     | leukocyte tyrosine kinase                                              | 63   | 55   | 61   |
| 78913  | Ltn1    | listerin E3 ubiquitin protein ligase 1                                 | 110  | 115  | 110  |
| 67684  | Luc7l3  | LUC7-like 3 (S. cerevisiae)                                            | 117  | 112  | 117  |
| 17069  | Ly6e    | lymphocyte antigen 6 complex, locus E                                  | 131  | 131  | 135  |
| 69541  | Lyg1    | lysozyme G-like 1                                                      | 107  | 116  | 103  |
| 332427 | Lyg2    | lysozyme G-like 2                                                      | 88   | 86   | 90   |
| 17095  | Lyl1    | lymphoblastomic leukemia 1                                             | 104  | 99   | 109  |
| 17096  | Lyn     | Yamaguchi sarcoma viral (v-yes-1) oncogene homolog                     | 180  | 179  | 164  |
| 18777  | Lypla1  | lysophospholipase 1                                                    | 92   | 93   | 98   |
| 26394  | Lypla2  | lysophospholipase 2                                                    | 28   | 27   | 29   |
| 80289  | Lysmd3  | LysM, putative peptidoglycan-binding, domain containing 3              | 97   | 108  | 103  |
| 75099  | Lysmd4  | LysM, putative peptidoglycan-binding, domain containing 4              | 685  | 677  | 669  |
| 17101  | Lyst    | lysosomal trafficking regulator                                        | 443  | 436  | 445  |
| 114332 | Lyve1   | lymphatic vessel endothelial hyaluronan receptor 1                     | 131  | 132  | 131  |
| 17110  | Lyz1    | lysozyme 1                                                             | 122  | 127  | 124  |

|        |          |                                                                   |      |      |      |
|--------|----------|-------------------------------------------------------------------|------|------|------|
| 17105  | Lyz2     | lysozyme 2                                                        | 68   | 75   | 68   |
| 67328  | Lyz1l    | lysozyme-like 1                                                   | 1087 | 1110 | 1084 |
| 69032  | Lyz14    | lysozyme-like 4                                                   | 191  | 186  | 186  |
| 69444  | Lyz16    | lysozyme-like 6                                                   | 44   | 48   | 45   |
| 11426  | Macf1    | microtubule-actin crosslinking factor 1                           | 393  | 405  | 401  |
| 107227 | Macrocl1 | MACRO domain containing 1                                         | 82   | 82   | 77   |
| 72899  | Macrocl2 | MACRO domain containing 2                                         | 347  | 356  | 337  |
| 56150  | Mad21l   | MAD2 mitotic arrest deficient-like 1 (yeast)                      | 775  | 774  | 757  |
| 71890  | Mad212   | MAD2 mitotic arrest deficient-like 2 (yeast)                      | 27   | 27   | 30   |
| 228355 | Madd     | MAP-kinase activating death domain                                | 102  | 106  | 100  |
| 98558  | Mael     | maelstrom homolog (Drosophila)                                    | 153  | 156  | 146  |
| 17132  | Maf      | avian musculoaponeurotic fibrosarcoma (v-maf) AS42 oncogene h     | 2657 | 2655 | 2674 |
| 68877  | Maf1     | MAF1 homolog (S. cerevisiae)                                      | 19   | 22   | 20   |
| 378435 | Mafa     | v-maf musculoaponeurotic fibrosarcoma oncogene family, protein /  | 173  | 170  | 175  |
| 16658  | Mafb     | v-maf musculoaponeurotic fibrosarcoma oncogene family, protein f  | 406  | 408  | 423  |
| 17133  | Maff     | v-maf musculoaponeurotic fibrosarcoma oncogene family, protein f  | 58   | 54   | 57   |
| 17134  | Mafg     | v-maf musculoaponeurotic fibrosarcoma oncogene family, protein c  | 25   | 21   | 20   |
| 17135  | Mafk     | v-maf musculoaponeurotic fibrosarcoma oncogene family, protein l  | 45   | 42   | 44   |
| 94275  | Maged1   | melanoma antigen, family D, 1                                     | 310  | 300  | 300  |
| 17149  | Magoh    | mago-nashi homolog, proliferation-associated (Drosophila)         | 113  | 112  | 104  |
| 66441  | Magohb   | mago-nashi homolog B (Drosophila)                                 | 88   | 84   | 91   |
| 17152  | Mak      | male germ cell-associated kinase                                  | 138  | 129  | 137  |
| 240354 | Malt1    | mucosa associated lymphoid tissue lymphoma translocation gene     | 239  | 241  | 235  |
| 71738  | Mamdc2   | MAM domain containing 2                                           | 489  | 493  | 478  |
| 103806 | Maml1    | mastermind like 1 (Drosophila)                                    | 106  | 113  | 112  |
| 270118 | Maml2    | mastermind like 2 (Drosophila)                                    | 473  | 468  | 457  |
| 433586 | Maml3    | mastermind like 3 (Drosophila)                                    | 780  | 767  | 780  |
| 333639 | Mamld1   | mastermind-like domain containing 1                               | 816  | 802  | 803  |
| 74490  | Mamstr   | MEF2 activating motif and SAP domain containing transcriptional r | 44   | 40   | 50   |
| 17155  | Man1a    | mannosidase 1, alpha                                              | 413  | 406  | 416  |
| 17156  | Man1a2   | mannosidase, alpha, class 1A, member 2                            | 427  | 415  | 416  |
| 227619 | Man1b1   | mannosidase, alpha, class 1B, member 1                            | 30   | 28   | 32   |
| 230815 | Man1c1   | mannosidase, alpha, class 1C, member 1                            | 279  | 269  | 283  |
| 17158  | Man2a1   | mannosidase 2, alpha 1                                            | 1516 | 1589 | 1548 |
| 140481 | Man2a2   | mannosidase 2, alpha 2                                            | 52   | 53   | 57   |
| 17159  | Man2b1   | mannosidase 2, alpha B1                                           | 51   | 51   | 56   |
| 17160  | Man2b2   | mannosidase 2, alpha B2                                           | 86   | 90   | 95   |
| 73744  | Man2c1   | mannosidase, alpha, class 2C, member 1                            | 92   | 89   | 92   |
| 110173 | Manba    | mannosidase, beta A, lysosomal                                    | 339  | 333  | 329  |
| 17161  | Maoa     | monoamine oxidase A                                               | 362  | 350  | 353  |
| 109731 | Maob     | monoamine oxidase B                                               | 344  | 353  | 341  |
| 66734  | Map1lc3a | microtubule-associated protein 1 light chain 3 alpha              | 156  | 155  | 156  |
| 67443  | Map1lc3b | microtubule-associated protein 1 light chain 3 beta               | 90   | 85   | 91   |
| 26395  | Map2k1   | mitogen-activated protein kinase kinase 1                         | 55   | 59   | 57   |
| 26396  | Map2k2   | mitogen-activated protein kinase kinase 2                         | 37   | 44   | 46   |
| 26397  | Map2k3   | mitogen-activated protein kinase kinase 3                         | 168  | 168  | 178  |
| 26398  | Map2k4   | mitogen-activated protein kinase kinase 4                         | 92   | 97   | 90   |
| 23938  | Map2k5   | mitogen-activated protein kinase kinase 5                         | 323  | 324  | 323  |
| 26399  | Map2k6   | mitogen-activated protein kinase kinase 6                         | 799  | 798  | 789  |
| 26400  | Map2k7   | mitogen-activated protein kinase kinase 7                         | 26   | 27   | 25   |
| 26401  | Map3k1   | mitogen-activated protein kinase kinase kinase 1                  | 754  | 770  | 763  |
| 269881 | Map3k10  | mitogen-activated protein kinase kinase kinase 10                 | 21   | 22   | 23   |
| 26403  | Map3k11  | mitogen-activated protein kinase kinase kinase 11                 | 16   | 11   | 16   |
| 26404  | Map3k12  | mitogen-activated protein kinase kinase kinase 12                 | 56   | 55   | 58   |
| 71751  | Map3k13  | mitogen-activated protein kinase kinase kinase 13                 | 202  | 190  | 201  |

|        |          |                                                                |      |      |      |
|--------|----------|----------------------------------------------------------------|------|------|------|
| 53859  | Map3k14  | mitogen-activated protein kinase kinase kinase 14              | 163  | 158  | 162  |
| 270672 | Map3k15  | mitogen-activated protein kinase kinase kinase 15              | 366  | 380  | 353  |
| 26405  | Map3k2   | mitogen-activated protein kinase kinase kinase 2               | 124  | 131  | 124  |
| 26406  | Map3k3   | mitogen-activated protein kinase kinase kinase 3               | 115  | 120  | 125  |
| 26407  | Map3k4   | mitogen-activated protein kinase kinase kinase 4               | 331  | 334  | 331  |
| 26408  | Map3k5   | mitogen-activated protein kinase kinase kinase 5               | 302  | 300  | 292  |
| 53608  | Map3k6   | mitogen-activated protein kinase kinase kinase 6               | 52   | 48   | 51   |
| 26409  | Map3k7   | mitogen-activated protein kinase kinase kinase 7               | 4635 | 4673 | 4586 |
| 26410  | Map3k8   | mitogen-activated protein kinase kinase kinase 8               | 265  | 275  | 267  |
| 338372 | Map3k9   | mitogen-activated protein kinase kinase kinase 9               | 288  | 291  | 304  |
| 26411  | Map4k1   | mitogen-activated protein kinase kinase kinase kinase 1        | 132  | 124  | 133  |
| 26412  | Map4k2   | mitogen-activated protein kinase kinase kinase kinase 2        | 34   | 35   | 32   |
| 225028 | Map4k3   | mitogen-activated protein kinase kinase kinase kinase 3        | 502  | 488  | 483  |
| 26921  | Map4k4   | mitogen-activated protein kinase kinase kinase kinase 4        | 354  | 350  | 357  |
| 399510 | Map4k5   | mitogen-activated protein kinase kinase kinase kinase 5        | 90   | 91   | 94   |
| 208158 | Map6d1   | MAP6 domain containing 1                                       | 162  | 157  | 158  |
| 26413  | Mapk1    | mitogen-activated protein kinase 1                             | 227  | 225  | 223  |
| 26414  | Mapk10   | mitogen-activated protein kinase 10                            | 1226 | 1227 | 1197 |
| 19094  | Mapk11   | mitogen-activated protein kinase 11                            | 43   | 42   | 40   |
| 29857  | Mapk12   | mitogen-activated protein kinase 12                            | 24   | 26   | 25   |
| 26415  | Mapk13   | mitogen-activated protein kinase 13                            | 135  | 131  | 144  |
| 26416  | Mapk14   | mitogen-activated protein kinase 14                            | 189  | 191  | 193  |
| 332110 | Mapk15   | mitogen-activated protein kinase 15                            | 34   | 31   | 28   |
| 26417  | Mapk3    | mitogen-activated protein kinase 3                             | 80   | 78   | 80   |
| 225724 | Mapk4    | mitogen-activated protein kinase 4                             | 472  | 455  | 455  |
| 50772  | Mapk6    | mitogen-activated protein kinase 6                             | 126  | 122  | 126  |
| 23939  | Mapk7    | mitogen-activated protein kinase 7                             | 25   | 25   | 22   |
| 26419  | Mapk8    | mitogen-activated protein kinase 8                             | 460  | 474  | 464  |
| 19099  | Mapk8ip1 | mitogen-activated protein kinase 8 interacting protein 1       | 67   | 77   | 73   |
| 60597  | Mapk8ip2 | mitogen-activated protein kinase 8 interacting protein 2       | 60   | 61   | 63   |
| 30957  | Mapk8ip3 | mitogen-activated protein kinase 8 interacting protein 3       | 86   | 83   | 89   |
| 26420  | Mapk9    | mitogen-activated protein kinase 9                             | 137  | 139  | 140  |
| 227743 | Mapkap1  | mitogen-activated protein kinase associated protein 1          | 489  | 505  | 504  |
| 17164  | Mapkapk2 | MAP kinase-activated protein kinase 2                          | 146  | 145  | 148  |
| 102626 | Mapkapk3 | mitogen-activated protein kinase-activated protein kinase 3    | 79   | 81   | 82   |
| 17165  | Mapkapk5 | MAP kinase-activated protein kinase 5                          | 93   | 88   | 89   |
| 26390  | Mapkbp1  | mitogen-activated protein kinase binding protein 1             | 166  | 165  | 166  |
| 100732 | Mapre3   | microtubule-associated protein, RP/EB family, member 3         | 202  | 206  | 210  |
| 226778 | Mark1    | MAP/microtubule affinity-regulating kinase 1                   | 413  | 411  | 416  |
| 13728  | Mark2    | MAP/microtubule affinity-regulating kinase 2                   | 211  | 208  | 212  |
| 17169  | Mark3    | MAP/microtubule affinity-regulating kinase 3                   | 179  | 175  | 182  |
| 232944 | Mark4    | MAP/microtubule affinity-regulating kinase 4                   | 120  | 119  | 121  |
| 216443 | Mars     | methionine-tRNA synthetase                                     | 44   | 39   | 36   |
| 212679 | Mars2    | methionine-tRNA synthetase 2 (mitochondrial)                   | 173  | 169  | 168  |
| 17171  | Mas1     | MAS1 oncogene                                                  | 140  | 129  | 137  |
| 17174  | Masp1    | mannan-binding lectin serine peptidase 1                       | 228  | 227  | 241  |
| 17175  | Masp2    | mannan-binding lectin serine peptidase 2                       | 44   | 45   | 44   |
| 56527  | Mast1    | microtubule associated serine/threonine kinase 1               | 49   | 46   | 48   |
| 17776  | Mast2    | microtubule associated serine/threonine kinase 2               | 373  | 372  | 364  |
| 546071 | Mast3    | microtubule associated serine/threonine kinase 3               | 32   | 34   | 33   |
| 328329 | Mast4    | microtubule associated serine/threonine kinase family member 4 | 1354 | 1363 | 1328 |
| 67121  | Mastl    | microtubule associated serine/threonine kinase-like            | 120  | 107  | 115  |
| 11720  | Mat1a    | methionine adenosyltransferase I, alpha                        | 71   | 73   | 74   |
| 232087 | Mat2a    | methionine adenosyltransferase II, alpha                       | 173  | 161  | 154  |
| 108645 | Mat2b    | methionine adenosyltransferase II, beta                        | 4751 | 4810 | 4771 |

|        |        |                                                                                |      |      |      |
|--------|--------|--------------------------------------------------------------------------------|------|------|------|
| 17179  | Matk   | megakaryocyte-associated tyrosine kinase                                       | 39   | 40   | 40   |
| 228607 | Mavs   | mitochondrial antiviral signaling protein                                      | 66   | 68   | 63   |
| 17187  | Max    | Max protein                                                                    | 516  | 536  | 531  |
| 17188  | Maz    | MYC-associated zinc finger protein (purine-binding transcription factor)       | 21   | 19   | 21   |
| 17190  | Mbd1   | methyl-CpG binding domain protein 1                                            | 87   | 83   | 84   |
| 17191  | Mbd2   | methyl-CpG binding domain protein 2                                            | 2310 | 2371 | 2277 |
| 17192  | Mbd3   | methyl-CpG binding domain protein 3                                            | 18   | 24   | 21   |
| 73503  | Mbd3l1 | methyl-CpG binding domain protein 3-like 1                                     | 362  | 370  | 360  |
| 17193  | Mbd4   | methyl-CpG binding domain protein 4                                            | 21   | 21   | 21   |
| 217588 | Mbip   | MAP3K12 binding inhibitory protein 1                                           | 876  | 917  | 875  |
| 17194  | Mbl1   | mannose-binding lectin (protein A) 1                                           | 66   | 74   | 63   |
| 17195  | Mbl2   | mannose-binding lectin (protein C) 2                                           | 456  | 461  | 456  |
| 56758  | Mbnl1  | muscleblind-like 1 (Drosophila)                                                | 1175 | 1177 | 1132 |
| 105559 | Mbnl2  | muscleblind-like 2                                                             | 557  | 552  | 573  |
| 171170 | Mbnl3  | muscleblind-like 3 (Drosophila)                                                | 798  | 827  | 760  |
| 218121 | Mboat1 | membrane bound O-acyltransferase domain containing 1                           | 434  | 440  | 438  |
| 67216  | Mboat2 | membrane bound O-acyltransferase domain containing 2                           | 349  | 344  | 352  |
| 234155 | Mboat4 | membrane bound O-acyltransferase domain containing 4                           | 49   | 47   | 51   |
| 77582  | Mboat7 | membrane bound O-acyltransferase domain containing 7                           | 22   | 20   | 20   |
| 103537 | Mbtd1  | mbt domain containing 1                                                        | 89   | 89   | 87   |
| 56453  | Mbtps1 | membrane-bound transcription factor peptidase, site 1                          | 90   | 102  | 91   |
| 270669 | Mbtps2 | membrane-bound transcription factor peptidase, site 2                          | 162  | 152  | 151  |
| 17199  | Mc1r   | melanocortin 1 receptor                                                        | 53   | 56   | 52   |
| 17202  | Mc4r   | melanocortin 4 receptor                                                        | 809  | 791  | 801  |
| 223722 | Mcat   | malonyl CoA:ACP acyltransferase (mitochondrial)                                | 46   | 43   | 45   |
| 72039  | Mccc1  | methylcrotonoyl-Coenzyme A carboxylase 1 (alpha)                               | 63   | 67   | 59   |
| 78038  | Mccc2  | methylcrotonoyl-Coenzyme A carboxylase 2 (beta)                                | 260  | 261  | 271  |
| 73724  | Mcee   | methylmalonyl CoA epimerase                                                    | 141  | 147  | 140  |
| 193813 | Mcfd2  | multiple coagulation factor deficiency 2                                       | 233  | 222  | 229  |
| 70024  | Mcm10  | minichromosome maintenance deficient 10 (S. cerevisiae)                        | 114  | 112  | 120  |
| 17216  | Mcm2   | minichromosome maintenance deficient 2 mitotin (S. cerevisiae)                 | 36   | 36   | 38   |
| 17215  | Mcm3   | minichromosome maintenance deficient 3 (S. cerevisiae)                         | 135  | 132  | 139  |
| 17217  | Mcm4   | minichromosome maintenance deficient 4 homolog (S. cerevisiae)                 | 55   | 59   | 53   |
| 17218  | Mcm5   | minichromosome maintenance deficient 5, cell division cycle 46 (S. cerevisiae) | 161  | 163  | 165  |
| 17219  | Mcm6   | minichromosome maintenance deficient 6 (MIS5 homolog, S. pombe)                | 122  | 113  | 115  |
| 17220  | Mcm7   | minichromosome maintenance deficient 7 (S. cerevisiae)                         | 8    | 7    | 8    |
| 66634  | Mcm8   | minichromosome maintenance deficient 8 (S. cerevisiae)                         | 39   | 35   | 41   |
| 71567  | Mcm9   | minichromosome maintenance complex component 9                                 | 197  | 193  | 199  |
| 210711 | Mcmbp  | MCM (minichromosome maintenance deficient) binding protein                     | 169  | 173  | 178  |
| 17224  | Mcpt1  | mast cell protease 1                                                           | 28   | 26   | 23   |
| 17225  | Mcpt2  | mast cell protease 2                                                           | 40   | 38   | 44   |
| 17227  | Mcpt4  | mast cell protease 4                                                           | 55   | 59   | 51   |
| 17231  | Mcpt8  | mast cell protease 8                                                           | 50   | 51   | 56   |
| 17232  | Mcpt9  | mast cell protease 9                                                           | 37   | 31   | 35   |
| 51812  | Mcrs1  | microspherule protein 1                                                        | 87   | 78   | 80   |
| 68995  | Mcts1  | malignant T cell amplified sequence 1                                          | 68   | 76   | 73   |
| 66405  | Mcts2  | malignant T cell amplified sequence 2                                          | 89   | 81   | 82   |
| 240087 | Mdc1   | mediator of DNA damage checkpoint 1                                            | 29   | 32   | 31   |
| 17240  | Mdfi   | MyoD family inhibitor                                                          | 172  | 168  | 177  |
| 16543  | Mdfic  | MyoD family inhibitor domain containing                                        | 2162 | 2170 | 2121 |
| 17449  | Mdh1   | malate dehydrogenase 1, NAD (soluble)                                          | 84   | 80   | 73   |
| 76668  | Mdh1b  | malate dehydrogenase 1B, NAD (soluble)                                         | 61   | 55   | 56   |
| 17448  | Mdh2   | malate dehydrogenase 2, NAD (mitochondrial)                                    | 49   | 48   | 48   |
| 17242  | Mdk    | midkine                                                                        | 32   | 32   | 32   |
| 17246  | Mdm2   | transformed mouse 3T3 cell double minute 2                                     | 150  | 159  | 150  |

|        |        |                                                                    |      |      |      |
|--------|--------|--------------------------------------------------------------------|------|------|------|
| 17248  | Mdm4   | transformed mouse 3T3 cell double minute 4                         | 215  | 217  | 214  |
| 67881  | Mdp1   | magnesium-dependent phosphatase 1                                  | 32   | 28   | 28   |
| 17436  | Me1    | malic enzyme 1, NADP(+)-dependent, cytosolic                       | 226  | 231  | 227  |
| 107029 | Me2    | malic enzyme 2, NAD(+)-dependent, mitochondrial                    | 141  | 131  | 134  |
| 109264 | Me3    | malic enzyme 3, NADP(+)-dependent, mitochondrial                   | 507  | 495  | 477  |
| 70088  | Meaf6  | MYST/Esa1-associated factor 6                                      | 83   | 78   | 83   |
| 14013  | Mecom  | MDS1 and EVI1 complex locus                                        | 2133 | 2183 | 2142 |
| 17257  | Mecp2  | methyl CpG binding protein 2                                       | 122  | 133  | 121  |
| 26922  | Mecr   | mitochondrial trans-2-enoyl-CoA reductase                          | 36   | 43   | 45   |
| 19014  | Med1   | mediator complex subunit 1                                         | 70   | 62   | 69   |
| 28077  | Med10  | mediator of RNA polymerase II transcription, subunit 10 homolog (l | 1145 | 1150 | 1156 |
| 66172  | Med11  | mediator of RNA polymerase II transcription, subunit 11 homolog (l | 36   | 34   | 33   |
| 59024  | Med12  | mediator of RNA polymerase II transcription, subunit 12 homolog (l | 37   | 38   | 38   |
| 329650 | Med12l | mediator of RNA polymerase II transcription, subunit 12 homolog (l | 277  | 276  | 269  |
| 327987 | Med13  | mediator complex subunit 13                                        | 294  | 295  | 297  |
| 76199  | Med13l | mediator complex subunit 13-like                                   | 1828 | 1851 | 1819 |
| 26896  | Med14  | mediator complex subunit 14                                        | 500  | 489  | 486  |
| 216154 | Med16  | mediator complex subunit 16                                        | 29   | 30   | 32   |
| 234959 | Med17  | mediator complex subunit 17                                        | 86   | 82   | 78   |
| 67219  | Med18  | mediator of RNA polymerase II transcription, subunit 18 homolog (l | 124  | 115  | 114  |
| 381379 | Med19  | mediator of RNA polymerase II transcription, subunit 19 homolog (l | 46   | 47   | 48   |
| 108098 | Med21  | mediator complex subunit 21                                        | 16   | 16   | 14   |
| 20933  | Med22  | mediator complex subunit 22                                        | 11   | 10   | 9    |
| 70208  | Med23  | mediator complex subunit 23                                        | 119  | 112  | 114  |
| 23989  | Med24  | mediator complex subunit 24                                        | 57   | 55   | 53   |
| 75613  | Med25  | mediator of RNA polymerase II transcription, subunit 25 homolog (l | 30   | 33   | 31   |
| 70625  | Med26  | mediator complex subunit 26                                        | 96   | 105  | 102  |
| 68975  | Med27  | mediator complex subunit 27                                        | 468  | 466  | 480  |
| 66999  | Med28  | mediator of RNA polymerase II transcription, subunit 28 homolog (l | 194  | 185  | 175  |
| 67224  | Med29  | mediator complex subunit 29                                        | 16   | 19   | 20   |
| 69790  | Med30  | mediator complex subunit 30                                        | 1349 | 1351 | 1342 |
| 67279  | Med31  | mediator of RNA polymerase II transcription, subunit 31 homolog (l | 65   | 72   | 64   |
| 67381  | Med4   | mediator of RNA polymerase II transcription, subunit 4 homolog (ye | 204  | 216  | 208  |
| 69792  | Med6   | mediator of RNA polymerase II transcription, subunit 6 homolog (ye | 80   | 80   | 79   |
| 66213  | Med7   | mediator complex subunit 7                                         | 65   | 65   | 57   |
| 80509  | Med8   | mediator of RNA polymerase II transcription, subunit 8 homolog (ye | 25   | 25   | 24   |
| 192191 | Med9   | mediator of RNA polymerase II transcription, subunit 9 homolog (ye | 158  | 147  | 148  |
| 17258  | Mef2a  | myocyte enhancer factor 2A                                         | 527  | 522  | 520  |
| 17260  | Mef2c  | myocyte enhancer factor 2C                                         | 2447 | 2465 | 2416 |
| 17261  | Mef2d  | myocyte enhancer factor 2D                                         | 167  | 167  | 171  |
| 17263  | Meg3   | maternally expressed 3                                             | 137  | 137  | 138  |
| 17268  | Meis1  | Meis homeobox 1                                                    | 2544 | 2535 | 2495 |
| 17536  | Meis2  | Meis homeobox 2                                                    | 564  | 575  | 576  |
| 17279  | Melk   | maternal embryonic leucine zipper kinase                           | 711  | 703  | 703  |
| 17283  | Men1   | multiple endocrine neoplasia 1                                     | 42   | 41   | 39   |
| 17285  | Meox1  | mesenchyme homeobox 1                                              | 229  | 239  | 229  |
| 17287  | Mep1a  | meprin 1 alpha                                                     | 230  | 226  | 233  |
| 17288  | Mep1b  | meprin 1 beta                                                      | 400  | 392  | 385  |
| 231803 | Mepce  | methylphosphate capping enzyme                                     | 8    | 8    | 9    |
| 17289  | Mertk  | c-mer proto-oncogene tyrosine kinase                               | 167  | 174  | 158  |
| 67943  | Mesdc2 | mesoderm development candidate 2                                   | 255  | 262  | 249  |
| 17292  | Mesp1  | mesoderm posterior 1                                               | 91   | 87   | 83   |
| 17293  | Mesp2  | mesoderm posterior 2                                               | 65   | 62   | 62   |
| 17295  | Met    | met proto-oncogene                                                 | 423  | 400  | 429  |
| 75624  | Metap1 | methionyl aminopeptidase 1                                         | 106  | 107  | 105  |

|        |          |                                                                        |      |      |      |
|--------|----------|------------------------------------------------------------------------|------|------|------|
| 66559  | Metap1d  | methionyl aminopeptidase type 1D (mitochondrial)                       | 182  | 183  | 173  |
| 56307  | Metap2   | methionine aminopeptidase 2                                            | 167  | 169  | 162  |
| 17299  | Mettl1   | methyltransferase like 1                                               | 9    | 6    | 7    |
| 72096  | Mettl10  | methyltransferase like 10                                              | 58   | 62   | 58   |
| 66617  | Mettl11a | methyltransferase like 11A                                             | 30   | 31   | 33   |
| 240879 | Mettl11b | methyltransferase like 11B                                             | 489  | 475  | 468  |
| 71449  | Mettl13  | methyltransferase like 13                                              | 119  | 118  | 125  |
| 210529 | Mettl14  | methyltransferase like 14                                              | 227  | 236  | 219  |
| 76894  | Mettl15  | methyltransferase like 15                                              | 2492 | 2577 | 2482 |
| 67493  | Mettl16  | methyltransferase like 16                                              | 144  | 145  | 152  |
| 52535  | Mettl17  | methyltransferase like 17                                              | 55   | 53   | 48   |
| 52686  | Mettl2   | methyltransferase like 2                                               | 116  | 113  | 111  |
| 67099  | Mettl21a | methyltransferase like 21A                                             | 196  | 200  | 204  |
| 207965 | Mettl21d | methyltransferase like 21D                                             | 264  | 265  | 277  |
| 239706 | Mettl22  | methyltransferase like 22                                              | 113  | 115  | 106  |
| 56335  | Mettl3   | methyltransferase like 3                                               | 58   | 60   | 61   |
| 76781  | Mettl4   | methyltransferase like 4                                               | 1948 | 2014 | 1946 |
| 75422  | Mettl5   | methyltransferase like 5                                               | 46   | 46   | 42   |
| 67011  | Mettl6   | methyltransferase like 6                                               | 78   | 79   | 76   |
| 70152  | Mettl7a1 | methyltransferase like 7A1                                             | 67   | 69   | 71   |
| 71664  | Mettl7b  | methyltransferase like 7B                                              | 70   | 65   | 68   |
| 228019 | Mettl8   | methyltransferase like 8                                               | 355  | 340  | 344  |
| 237400 | Mex3d    | mex3 homolog D ( <i>C. elegans</i> )                                   | 49   | 46   | 47   |
| 67414  | Mfn1     | mitofusin 1                                                            | 134  | 136  | 139  |
| 170731 | Mfn2     | mitofusin 2                                                            | 85   | 87   | 87   |
| 29808  | Mga      | MAX gene associated                                                    | 226  | 223  | 220  |
| 232714 | Mgam     | maltase-glucoamylase                                                   | 347  | 356  | 339  |
| 17308  | Mgat1    | mannoside acetylglucosaminyltransferase 1                              | 105  | 98   | 107  |
| 217664 | Mgat2    | mannoside acetylglucosaminyltransferase 2                              | 15   | 16   | 12   |
| 17309  | Mgat3    | mannoside acetylglucosaminyltransferase 3                              | 134  | 124  | 131  |
| 269181 | Mgat4a   | mannoside acetylglucosaminyltransferase 4, isoenzyme A                 | 285  | 309  | 289  |
| 103534 | Mgat4b   | mannoside acetylglucosaminyltransferase 4, isoenzyme B                 | 32   | 35   | 33   |
| 67569  | Mgat4c   | mannosyl (alpha-1,3-)-glycoprotein beta-1,4-N-acetylglucosaminylt      | 2604 | 2610 | 2556 |
| 107895 | Mgat5    | mannoside acetylglucosaminyltransferase 5                              | 1108 | 1101 | 1102 |
| 76055  | Mgea5    | meningioma expressed antigen 5 (hyaluronidase)                         | 85   | 85   | 83   |
| 23945  | Mgll     | monoglyceride lipase                                                   | 284  | 283  | 276  |
| 17314  | Mgmt     | O-6-methylguanine-DNA methyltransferase                                | 2054 | 2050 | 2057 |
| 17237  | Mgrn1    | mahogunin, ring finger 1                                               | 82   | 79   | 78   |
| 56615  | Mgst1    | microsomal glutathione S-transferase 1                                 | 642  | 631  | 645  |
| 211666 | Mgst2    | microsomal glutathione S-transferase 2                                 | 698  | 716  | 717  |
| 66447  | Mgst3    | microsomal glutathione S-transferase 3                                 | 160  | 154  | 151  |
| 225164 | Mib1     | mindbomb homolog 1 ( <i>Drosophila</i> )                               | 99   | 92   | 97   |
| 76580  | Mib2     | mindbomb homolog 2 ( <i>Drosophila</i> )                               | 53   | 53   | 53   |
| 171580 | Mical1   | microtubule associated monooxygenase, calponin and LIM domain c        | 49   | 48   | 51   |
| 320878 | Mical2   | microtubule associated monooxygenase, calponin and LIM domain c        | 264  | 268  | 267  |
| 194401 | Mical3   | microtubule associated monooxygenase, calponin and LIM domain c        | 333  | 338  | 340  |
| 68041  | Mid1ip1  | Mid1 interacting protein 1 (gastrulation specific G12-like (zebrafish) | 1006 | 976  | 959  |
| 71148  | Mier1    | mesoderm induction early response 1 homolog ( <i>Xenopus laevis</i>    | 132  | 133  | 129  |
| 70427  | Mier2    | mesoderm induction early response 1, family member 2                   | 68   | 67   | 64   |
| 218613 | Mier3    | mesoderm induction early response 1, family member 3                   | 411  | 420  | 407  |
| 17319  | Mif      | macrophage migration inhibitory factor                                 | 74   | 74   | 75   |
| 69674  | Mif4gd   | MIF4G domain containing                                                | 32   | 27   | 30   |
| 50932  | Mink1    | misshapen-like kinase 1 (zebrafish)                                    | 97   | 100  | 94   |
| 56727  | Miox     | myo-inositol oxygenase                                                 | 38   | 43   | 43   |
| 70478  | Mipep    | mitochondrial intermediate peptidase                                   | 345  | 350  | 345  |

|        |            |                                                                          |      |      |      |
|--------|------------|--------------------------------------------------------------------------|------|------|------|
| 723893 | Mir10a     | microRNA 10a                                                             | 18   | 17   | 20   |
| 387136 | Mir1-1     | microRNA 1-1                                                             | 81   | 74   | 84   |
| 723959 | Mir1-2     | microRNA 1-2                                                             | 362  | 357  | 353  |
| 387233 | Mir124a-1  | microRNA 124a-1                                                          | 171  | 169  | 178  |
| 723950 | Mir124a-2  | microRNA 124a-2                                                          | 212  | 203  | 206  |
| 723951 | Mir124a-3  | microRNA 124a-3                                                          | 180  | 179  | 183  |
| 387151 | Mir133a-1  | microRNA 133a-1                                                          | 74   | 82   | 80   |
| 723954 | Mir133a-2  | microRNA 133a-2                                                          | 96   | 88   | 95   |
| 387173 | Mir155     | microRNA 155                                                             | 4371 | 4420 | 4343 |
| 723905 | Mir17      | microRNA 17                                                              | 4161 | 4228 | 4153 |
| 387191 | Mir196a-1  | microRNA 196a-1                                                          | 24   | 22   | 24   |
| 723958 | Mir196a-2  | microRNA 196a-2                                                          | 13   | 13   | 14   |
| 387242 | Mir200a    | microRNA 200a                                                            | 2    | 3    | 2    |
| 387243 | Mir200b    | microRNA 200b                                                            | 67   | 66   | 69   |
| 387199 | Mir203     | microRNA 203                                                             | 42   | 41   | 41   |
| 723814 | Mir223     | microRNA 223                                                             | 59   | 70   | 63   |
| 387225 | Mir30a     | microRNA 30a                                                             | 229  | 236  | 242  |
| 723902 | Mir7-1     | microRNA 7-1                                                             | 24   | 22   | 20   |
| 723884 | Mir7-2     | microRNA 7-2                                                             | 58   | 67   | 64   |
| 387244 | Mirlet7a-1 | microRNA let7a-1                                                         | 112  | 117  | 110  |
| 723965 | Mirlet7a-2 | microRNA let7a-2                                                         | 64   | 67   | 64   |
| 387246 | Mirlet7c-1 | microRNA let7c-1                                                         | 58   | 62   | 57   |
| 723966 | Mirlet7c-2 | microRNA let7c-2                                                         | 144  | 152  | 151  |
| 387248 | Mirlet7e   | microRNA let7e                                                           | 1    | #N/A | 1    |
| 17342  | Mitf       | microphthalmia-associated transcription factor                           | 1160 | 1134 | 1130 |
| 27217  | Mixl1      | Mix1 homeobox-like 1 ( <i>Xenopus laevis</i> )                           | 113  | 113  | 112  |
| 59030  | Mkks       | McKusick-Kaufman syndrome protein                                        | 1    | 1    | 1    |
| 223701 | Mkl1       | MKL (megakaryoblastic leukemia)/myocardin-like 1                         | 403  | 397  | 406  |
| 239719 | Mkl2       | MKL/myocardin-like 2                                                     | 567  | 572  | 565  |
| 17346  | Mknk1      | MAP kinase-interacting serine/threonine kinase 1                         | 74   | 72   | 74   |
| 17347  | Mknk2      | MAP kinase-interacting serine/threonine kinase 2                         | 52   | 54   | 54   |
| 109154 | Mlec       | malectin                                                                 | 67   | 62   | 60   |
| 17349  | Mlf1       | myeloid leukemia factor 1                                                | 535  | 565  | 537  |
| 71876  | Mlf1ip     | myeloid leukemia factor 1 interacting protein                            | 182  | 188  | 203  |
| 17350  | Mlh1       | mutL homolog 1 ( <i>E. coli</i> )                                        | 197  | 207  | 205  |
| 217716 | Mlh3       | mutL homolog 3 ( <i>E. coli</i> )                                        | 86   | 82   | 81   |
| 74568  | Mlkl       | mixed lineage kinase domain-like                                         | 122  | 120  | 131  |
| 214162 | Mll1       | myeloid/lymphoid or mixed-lineage leukemia 1                             | 157  | 155  | 148  |
| 381022 | Mll2       | myeloid/lymphoid or mixed-lineage leukemia 2                             | 61   | 56   | 61   |
| 231051 | Mll3       | myeloid/lymphoid or mixed-lineage leukemia 3                             | 345  | 346  | 333  |
| 69188  | Mll5       | myeloid/lymphoid or mixed-lineage leukemia 5                             | 1099 | 1129 | 1098 |
| 17354  | Mllt10     | myeloid/lymphoid or mixed-lineage leukemia (trithorax homolog, <i>D.</i> | 440  | 433  | 420  |
| 56772  | Mllt11     | myeloid/lymphoid or mixed-lineage leukemia (trithorax homolog, <i>D.</i> | 15   | 16   | 15   |
| 70122  | Mllt3      | myeloid/lymphoid or mixed-lineage leukemia (trithorax homolog, <i>D.</i> | 1391 | 1416 | 1395 |
| 56716  | Mlst8      | MTOR associated protein, LST8 homolog ( <i>S. cerevisiae</i> )           | 19   | 18   | 19   |
| 21428  | Mlx        | MAX-like protein X                                                       | 14   | 14   | 15   |
| 208104 | Mlxip      | MLX interacting protein                                                  | 184  | 174  | 181  |
| 58805  | Mlxip1     | MLX interacting protein-like                                             | 87   | 89   | 99   |
| 56690  | Mlycd      | malonyl-CoA decarboxylase                                                | 115  | 117  | 119  |
| 77697  | Mmab       | methylmalonic aciduria (cobalamin deficiency) type B homolog ( <i>hu</i> | 82   | 75   | 80   |
| 17380  | Mme        | membrane metallo endopeptidase                                           | 1567 | 1591 | 1560 |
| 27390  | Mmel1      | membrane metallo-endopeptidase-like 1                                    | 52   | 49   | 47   |
| 17384  | Mmp10      | matrix metalloproteinase 10                                              | 130  | 127  | 124  |
| 17385  | Mmp11      | matrix metalloproteinase 11                                              | 17   | 18   | 18   |
| 17381  | Mmp12      | matrix metalloproteinase 12                                              | 162  | 149  | 152  |

|        |           |                                                                  |      |      |      |
|--------|-----------|------------------------------------------------------------------|------|------|------|
| 17386  | Mmp13     | matrix metallopeptidase 13                                       | 214  | 205  | 207  |
| 17387  | Mmp14     | matrix metallopeptidase 14 (membrane-inserted)                   | 45   | 44   | 41   |
| 17388  | Mmp15     | matrix metallopeptidase 15                                       | 126  | 132  | 128  |
| 17389  | Mmp16     | matrix metallopeptidase 16                                       | 3892 | 3931 | 3862 |
| 23948  | Mmp17     | matrix metallopeptidase 17                                       | 219  | 217  | 214  |
| 58223  | Mmp19     | matrix metallopeptidase 19                                       | 75   | 74   | 70   |
| 83995  | Mmp1a     | matrix metallopeptidase 1a (interstitial collagenase)            | 80   | 77   | 73   |
| 83996  | Mmp1b     | matrix metallopeptidase 1b (interstitial collagenase)            | 124  | 129  | 121  |
| 17390  | Mmp2      | matrix metallopeptidase 2                                        | 245  | 233  | 238  |
| 30800  | Mmp20     | matrix metallopeptidase 20 (enamelysin)                          | 154  | 157  | 157  |
| 214766 | Mmp21     | matrix metallopeptidase 21                                       | 92   | 93   | 94   |
| 26561  | Mmp23     | matrix metallopeptidase 23                                       | 51   | 49   | 50   |
| 17391  | Mmp24     | matrix metallopeptidase 24                                       | 91   | 88   | 87   |
| 240047 | Mmp25     | matrix metallopeptidase 25                                       | 80   | 75   | 77   |
| 234911 | Mmp27     | matrix metallopeptidase 27                                       | 94   | 87   | 89   |
| 118453 | Mmp28     | matrix metallopeptidase 28 (epilysin)                            | 43   | 42   | 42   |
| 17392  | Mmp3      | matrix metallopeptidase 3                                        | 99   | 105  | 94   |
| 17393  | Mmp7      | matrix metallopeptidase 7                                        | 177  | 190  | 174  |
| 17394  | Mmp8      | matrix metallopeptidase 8                                        | 90   | 89   | 87   |
| 17395  | Mmp9      | matrix metallopeptidase 9                                        | 77   | 76   | 77   |
| 72199  | Mms19     | MMS19 (MET18 <i>S. cerevisiae</i> )                              | 60   | 61   | 60   |
| 212377 | Mms22l    | MMS22-like, DNA repair protein                                   | 2963 | 3004 | 2978 |
| 17420  | Mnat1     | menage a trois 1                                                 | 215  | 225  | 211  |
| 76915  | Mnd1      | meiotic nuclear divisions 1 homolog ( <i>S. cerevisiae</i> )     | 167  | 173  | 169  |
| 17428  | Mnt       | max binding protein                                              | 158  | 155  | 150  |
| 15285  | Mnx1      | motor neuron and pancreas homeobox 1                             | 178  | 175  | 170  |
| 68473  | Mobkl1a   | MOB1, Mps One Binder kinase activator-like 1A (yeast)            | 106  | 110  | 114  |
| 214944 | Mobkl2b   | MOB1, Mps One Binder kinase activator-like 2B (yeast)            | 94   | 96   | 98   |
| 100465 | Mobkl2c   | MOB1, Mps One Binder kinase activator-like 2C (yeast)            | 67   | 69   | 66   |
| 68591  | Mocos     | molybdenum cofactor sulfurase                                    | 140  | 141  | 133  |
| 56738  | Mocs1     | molybdenum cofactor synthesis 1                                  | 329  | 317  | 333  |
| 17434  | Mocs2     | molybdenum cofactor synthesis 2                                  | 601  | 602  | 602  |
| 69372  | Mocs3     | molybdenum cofactor synthesis 3                                  | 49   | 50   | 46   |
| 68393  | Mogat1    | monoacylglycerol O-acyltransferase 1                             | 213  | 216  | 218  |
| 233549 | Mogat2    | monoacylglycerol O-acyltransferase 2                             | 114  | 107  | 108  |
| 57377  | Mogs      | mannosyl-oligosaccharide glucosidase                             | 16   | 15   | 16   |
| 338467 | Morc3     | microrchidia 3                                                   | 234  | 220  | 220  |
| 21761  | Morf4l1   | mortality factor 4 like 1                                        | 140  | 137  | 142  |
| 56397  | Morf4l2   | mortality factor 4 like 2                                        | 91   | 76   | 86   |
| 17451  | Mos       | Moloney sarcoma oncogene                                         | 136  | 134  | 130  |
| 66112  | Mosc1     | MOCO sulphurase C-terminal domain containing 1                   | 116  | 117  | 119  |
| 67247  | Mosc2     | MOCO sulphurase C-terminal domain containing 2                   | 71   | 74   | 80   |
| 70380  | Mospd1    | motile sperm domain containing 1                                 | 202  | 203  | 196  |
| 17454  | Mov10     | Moloney leukemia virus 10                                        | 92   | 98   | 103  |
| 59012  | Moxd1     | monooxygenase, DBH-like 1                                        | 578  | 577  | 568  |
| 194357 | Moxd2     | monooxygenase, DBH-like 2                                        | 353  | 344  | 342  |
| 24070  | Mpdu1     | mannose-P-dolichol utilization defect 1                          | 8    | 11   | 11   |
| 268395 | Mpg       | N-methylpurine-DNA glycosylase                                   | 61   | 61   | 57   |
| 67973  | Mphosph10 | M-phase phosphoprotein 10 (U3 small nucleolar ribonucleoprotein) | 28   | 24   | 26   |
| 68533  | Mphosph6  | M phase phosphoprotein 6                                         | 753  | 749  | 755  |
| 110119 | Mpi       | mannose phosphate isomerase                                      | 33   | 28   | 29   |
| 68047  | Mpnd      | MPN domain containing                                            | 40   | 36   | 36   |
| 17523  | Mpo       | myeloperoxidase                                                  | 91   | 87   | 82   |
| 13384  | Mpp3      | membrane protein, palmitoylated 3 (MAGUK p55 subfamily membe     | 71   | 71   | 63   |
| 56217  | Mpp5      | membrane protein, palmitoylated 5 (MAGUK p55 subfamily membe     | 217  | 218  | 219  |

|        |         |                                                                         |     |     |     |
|--------|---------|-------------------------------------------------------------------------|-----|-----|-----|
| 56524  | Mpp6    | membrane protein, palmitoylated 6 (MAGUK p55 subfamily membe            | 567 | 558 | 559 |
| 225651 | Mppe1   | metallophosphoesterase 1                                                | 105 | 115 | 106 |
| 17527  | Mpv17   | MpV17 mitochondrial inner membrane protein                              | 52  | 51  | 54  |
| 17532  | Mras    | muscle and microspikes RAS                                              | 126 | 123 | 114 |
| 17535  | Mre11a  | meiotic recombination 11 homolog A ( <i>S. cerevisiae</i> )             | 78  | 82  | 84  |
| 67873  | Mri1    | methylthioribose-1-phosphate isomerase homolog ( <i>S. cerevisiae</i> ) | 24  | 26  | 25  |
| 217038 | Mrm1    | mitochondrial rRNA methyltransferase 1 homolog ( <i>S. cerevisiae</i> ) | 391 | 390 | 396 |
| 67840  | Mrp63   | mitochondrial ribosomal protein 63                                      | 78  | 80  | 75  |
| 94061  | Mrpl1   | mitochondrial ribosomal protein L1                                      | 278 | 270 | 274 |
| 66419  | Mrpl11  | mitochondrial ribosomal protein L11                                     | 54  | 56  | 59  |
| 56282  | Mrpl12  | mitochondrial ribosomal protein L12                                     | 28  | 34  | 32  |
| 68537  | Mrpl13  | mitochondrial ribosomal protein L13                                     | 319 | 326 | 317 |
| 68463  | Mrpl14  | mitochondrial ribosomal protein L14                                     | 444 | 422 | 421 |
| 27395  | Mrpl15  | mitochondrial ribosomal protein L15                                     | 403 | 408 | 397 |
| 94063  | Mrpl16  | mitochondrial ribosomal protein L16                                     | 93  | 89  | 91  |
| 27397  | Mrpl17  | mitochondrial ribosomal protein L17                                     | 102 | 86  | 97  |
| 67681  | Mrpl18  | mitochondrial ribosomal protein L18                                     | 7   | 8   | 8   |
| 56284  | Mrpl19  | mitochondrial ribosomal protein L19                                     | 154 | 145 | 159 |
| 27398  | Mrpl2   | mitochondrial ribosomal protein L2                                      | 7   | 7   | 4   |
| 66448  | Mrpl20  | mitochondrial ribosomal protein L20                                     | 40  | 35  | 34  |
| 353242 | Mrpl21  | mitochondrial ribosomal protein L21                                     | 54  | 46  | 49  |
| 216767 | Mrpl22  | mitochondrial ribosomal protein L22                                     | 21  | 22  | 21  |
| 19935  | Mrpl23  | mitochondrial ribosomal protein L23                                     | 71  | 70  | 65  |
| 67707  | Mrpl24  | mitochondrial ribosomal protein L24                                     | 34  | 30  | 36  |
| 94064  | Mrpl27  | mitochondrial ribosomal protein L27                                     | 32  | 30  | 30  |
| 68611  | Mrpl28  | mitochondrial ribosomal protein L28                                     | 33  | 35  | 29  |
| 94062  | Mrpl3   | mitochondrial ribosomal protein L3                                      | 720 | 730 | 725 |
| 107734 | Mrpl30  | mitochondrial ribosomal protein L30                                     | 36  | 33  | 33  |
| 75398  | Mrpl32  | mitochondrial ribosomal protein L32                                     | 115 | 122 | 109 |
| 66845  | Mrpl33  | mitochondrial ribosomal protein L33                                     | 226 | 221 | 226 |
| 94065  | Mrpl34  | mitochondrial ribosomal protein L34                                     | 6   | 5   | 7   |
| 66223  | Mrpl35  | mitochondrial ribosomal protein L35                                     | 166 | 159 | 164 |
| 94066  | Mrpl36  | mitochondrial ribosomal protein L36                                     | 176 | 190 | 189 |
| 56280  | Mrpl37  | mitochondrial ribosomal protein L37                                     | 209 | 203 | 199 |
| 27393  | Mrpl39  | mitochondrial ribosomal protein L39                                     | 79  | 80  | 77  |
| 66163  | Mrpl4   | mitochondrial ribosomal protein L4                                      | 53  | 57  | 47  |
| 107733 | Mrpl41  | mitochondrial ribosomal protein L41                                     | 15  | 18  | 14  |
| 94067  | Mrpl43  | mitochondrial ribosomal protein L43                                     | 16  | 17  | 19  |
| 69163  | Mrpl44  | mitochondrial ribosomal protein L44                                     | 130 | 138 | 120 |
| 74600  | Mrpl47  | mitochondrial ribosomal protein L47                                     | 37  | 35  | 32  |
| 52443  | Mrpl48  | mitochondrial ribosomal protein L48                                     | 151 | 158 | 156 |
| 18120  | Mrpl49  | mitochondrial ribosomal protein L49                                     | 13  | 12  | 12  |
| 66493  | Mrpl51  | mitochondrial ribosomal protein L51                                     | 31  | 33  | 30  |
| 78523  | Mrpl9   | mitochondrial ribosomal protein L9                                      | 41  | 45  | 46  |
| 24030  | Mrps12  | mitochondrial ribosomal protein S12                                     | 29  | 32  | 31  |
| 64659  | Mrps14  | mitochondrial ribosomal protein S14                                     | 77  | 73  | 78  |
| 66407  | Mrps15  | mitochondrial ribosomal protein S15                                     | 44  | 45  | 48  |
| 66242  | Mrps16  | mitochondrial ribosomal protein S16                                     | 76  | 77  | 78  |
| 66258  | Mrps17  | mitochondrial ribosomal protein S17                                     | 18  | 23  | 21  |
| 68565  | Mrps18a | mitochondrial ribosomal protein S18A                                    | 148 | 145 | 145 |
| 66973  | Mrps18b | mitochondrial ribosomal protein S18B                                    | 7   | 9   | 7   |
| 68735  | Mrps18c | mitochondrial ribosomal protein S18C                                    | 27  | 27  | 32  |
| 118451 | Mrps2   | mitochondrial ribosomal protein S2                                      | 36  | 41  | 38  |
| 66292  | Mrps21  | mitochondrial ribosomal protein S21                                     | 40  | 38  | 35  |
| 64656  | Mrps23  | mitochondrial ribosomal protein S23                                     | 161 | 147 | 157 |

|        |         |                                                                   |      |      |      |
|--------|---------|-------------------------------------------------------------------|------|------|------|
| 59054  | Mrps30  | mitochondrial ribosomal protein S30                               | 1392 | 1422 | 1399 |
| 77721  | Mrps5   | mitochondrial ribosomal protein S5                                | 88   | 89   | 95   |
| 121022 | Mrps6   | mitochondrial ribosomal protein S6                                | 305  | 302  | 302  |
| 50529  | Mrps7   | mitochondrial ribosomal protein S7                                | 12   | 9    | 10   |
| 69527  | Mrps9   | mitochondrial ribosomal protein S9                                | 332  | 331  | 326  |
| 67871  | Mrrf    | mitochondrial ribosome recycling factor                           | 41   | 38   | 44   |
| 17681  | Msc     | musculin                                                          | 779  | 790  | 770  |
| 56184  | Msgn1   | mesogenin 1                                                       | 150  | 137  | 135  |
| 17685  | Msh2    | mutS homolog 2 (E. coli)                                          | 214  | 208  | 218  |
| 17686  | Msh3    | mutS homolog 3 (E. coli)                                          | 85   | 90   | 86   |
| 55993  | Msh4    | mutS homolog 4 (E. coli)                                          | 85   | 86   | 90   |
| 17687  | Msh5    | mutS homolog 5 (E. coli)                                          | 29   | 29   | 29   |
| 17688  | Msh6    | mutS homolog 6 (E. coli)                                          | 335  | 359  | 351  |
| 74026  | Msl1    | male-specific lethal 1 homolog (Drosophila)                       | 37   | 40   | 41   |
| 77853  | Msl2    | male-specific lethal 2 homolog (Drosophila)                       | 192  | 192  | 187  |
| 17692  | Msl3    | male-specific lethal 3 homolog (Drosophila)                       | 265  | 264  | 270  |
| 110265 | Msra    | methionine sulfoxide reductase A                                  | 623  | 631  | 631  |
| 76467  | MsrB2   | methionine sulfoxide reductase B2                                 | 328  | 320  | 311  |
| 320183 | MsrB3   | methionine sulfoxide reductase B3                                 | 149  | 153  | 155  |
| 15235  | Mst1    | macrophage stimulating 1 (hepatocyte growth factor-like)          | 20   | 18   | 20   |
| 19882  | Mst1r   | macrophage stimulating 1 receptor (c-met-related tyrosine kinase) | 53   | 55   | 49   |
| 17700  | Mstn    | myostatin                                                         | 292  | 306  | 298  |
| 17701  | Msx1    | homeobox, msh-like 1                                              | 279  | 275  | 276  |
| 93895  | Msx1as  | homeobox, msh-like 1 antisense                                    | 107  | 115  | 114  |
| 17702  | Msx2    | homeobox, msh-like 2                                              | 841  | 837  | 853  |
| 17703  | Msx3    | homeobox, msh-like 3                                              | 53   | 60   | 57   |
| 17751  | Mt3     | metallothionein 3                                                 | 45   | 45   | 44   |
| 23942  | Mta2    | metastasis-associated gene family, member 2                       | 31   | 29   | 33   |
| 66902  | Mtap    | methylthioadenosine phosphorylase                                 | 306  | 290  | 295  |
| 17756  | Mtap2   | microtubule-associated protein 2                                  | 679  | 702  | 683  |
| 17761  | Mtap7   | microtubule-associated protein 7                                  | 346  | 355  | 339  |
| 67154  | Mtdh    | metadherin                                                        | 712  | 702  | 713  |
| 545725 | Mterf   | mitochondrial transcription termination factor                    | 102  | 99   | 100  |
| 66410  | Mterfd1 | MTERF domain containing 1                                         | 168  | 172  | 151  |
| 74238  | Mterfd3 | MTERF domain containing 3                                         | 108  | 114  | 102  |
| 17764  | Mtf1    | metal response element binding transcription factor 1             | 138  | 146  | 146  |
| 69606  | Mtfmt   | mitochondrial methionyl-tRNA formyltransferase                    | 49   | 50   | 51   |
| 108156 | Mthfd1  | methylenetetrahydrofolate dehydrogenase (NADP+ dependent), m      | 105  | 102  | 103  |
| 270685 | Mthfd1l | methylenetetrahydrofolate dehydrogenase (NADP+ dependent) 1-l     | 515  | 521  | 500  |
| 17768  | Mthfd2  | methylenetetrahydrofolate dehydrogenase (NAD+ dependent), mei     | 118  | 121  | 118  |
| 665563 | Mthfd2l | methylenetetrahydrofolate dehydrogenase (NADP+ dependent) 2-l     | 149  | 159  | 155  |
| 17769  | Mthfr   | 5,10-methylenetetrahydrofolate reductase                          | 67   | 66   | 66   |
| 107885 | Mthfs   | 5, 10-methenyltetrahydrofolate synthetase                         | 543  | 550  | 535  |
| 234814 | Mthfsd  | methenyltetrahydrofolate synthetase domain containing             | 42   | 38   | 43   |
| 76784  | Mtif2   | mitochondrial translational initiation factor 2                   | 43   | 41   | 43   |
| 76366  | Mtif3   | mitochondrial translational initiation factor 3                   | 173  | 165  | 161  |
| 17772  | Mtm1    | X-linked myotubular myopathy gene 1                               | 407  | 370  | 394  |
| 53332  | Mtmr1   | myotubularin related protein 1                                    | 353  | 340  | 325  |
| 233315 | Mtmr10  | myotubularin related protein 10                                   | 217  | 215  | 214  |
| 194126 | Mtmr11  | myotubularin related protein 11                                   | 86   | 91   | 90   |
| 268783 | Mtmr12  | myotubularin related protein 12                                   | 198  | 184  | 195  |
| 97287  | Mtmr14  | myotubularin related protein 14                                   | 113  | 109  | 117  |
| 77116  | Mtmr2   | myotubularin related protein 2                                    | 209  | 219  | 217  |
| 74302  | Mtmr3   | myotubularin related protein 3                                    | 241  | 243  | 230  |
| 170749 | Mtmr4   | myotubularin related protein 4                                    | 42   | 43   | 46   |

|           |         |                                                                           |      |      |      |
|-----------|---------|---------------------------------------------------------------------------|------|------|------|
| 219135    | Mtmr6   | myotubularin related protein 6                                            | 160  | 165  | 172  |
| 54384     | Mtmr7   | myotubularin related protein 7                                            | 191  | 206  | 201  |
| 210376    | Mtmr9   | myotubularin related protein 9                                            | 125  | 127  | 127  |
| 68291     | Mto1    | mitochondrial translation optimization 1 homolog ( <i>S. cerevisiae</i> ) | 53   | 50   | 52   |
| 56717     | Mtor    | mechanistic target of rapamycin (serine/threonine kinase)                 | 79   | 74   | 68   |
| 67440     | Mtpap   | mitochondrial poly(A) polymerase                                          | 369  | 371  | 356  |
| 238505    | Mtr     | 5-methyltetrahydrofolate-homocysteine methyltransferase                   | 306  | 289  | 308  |
| 211253    | Mtrf1   | mitochondrial translational release factor 1                              | 51   | 49   | 44   |
| 108853    | Mtrf1l  | mitochondrial translational release factor 1-like                         | 154  | 156  | 158  |
| 210009    | Mtrr    | 5-methyltetrahydrofolate-homocysteine methyltransferase reductase         | 961  | 979  | 968  |
| 17777     | Mttp    | microsomal triglyceride transfer protein                                  | 121  | 114  | 117  |
| 224116    | Muc20   | mucin 20                                                                  | 169  | 172  | 174  |
| 68350     | Mul1    | mitochondrial ubiquitin ligase activator of NFKB 1                        | 67   | 75   | 77   |
| 68114     | Mum1    | melanoma associated antigen (mutated) 1                                   | 87   | 86   | 85   |
| 100039054 | Mup12   | major urinary protein 12                                                  | 147  | 151  | 142  |
| 68016     | Murc    | muscle-related coiled-coil protein                                        | 609  | 618  | 593  |
| 71711     | Mus81   | MUS81 endonuclease homolog (yeast)                                        | 17   | 18   | 20   |
| 18198     | Musk    | muscle, skeletal, receptor tyrosine kinase                                | 299  | 307  | 299  |
| 17850     | Mut     | methylmalonyl-Coenzyme A mutase                                           | 1744 | 1791 | 1721 |
| 70603     | Mutyh   | mutY homolog ( <i>E. coli</i> )                                           | 20   | 19   | 19   |
| 192156    | Mvd     | mevalonate (diphospho) decarboxylase                                      | 22   | 23   | 20   |
| 17855     | Mvk     | mevalonate kinase                                                         | 154  | 155  | 165  |
| 17857     | Mx1     | myxovirus (influenza virus) resistance 1                                  | 191  | 193  | 189  |
| 17858     | Mx2     | myxovirus (influenza virus) resistance 2                                  | 135  | 138  | 143  |
| 17121     | Mxd3    | Max dimerization protein 3                                                | 56   | 47   | 50   |
| 17122     | Mxd4    | Max dimerization protein 4                                                | 156  | 155  | 145  |
| 17859     | Mxi1    | Max interacting protein 1                                                 | 201  | 198  | 191  |
| 17863     | Myb     | myeloblastosis oncogene                                                   | 329  | 328  | 335  |
| 18432     | Mybbp1a | MYB binding protein (P160) 1a                                             | 69   | 70   | 66   |
| 17864     | Mybl1   | myeloblastosis oncogene-like 1                                            | 154  | 147  | 143  |
| 17865     | Mybl2   | myeloblastosis oncogene-like 2                                            | 90   | 98   | 97   |
| 17869     | Myc     | myelocytomatosis oncogene                                                 | 1408 | 1436 | 1415 |
| 105689    | Mycbp2  | MYC binding protein 2                                                     | 509  | 523  | 499  |
| 18109     | Mycn    | v-myc myelocytomatosis viral related oncogene, neuroblastoma de           | 1266 | 1274 | 1275 |
| 17874     | Myd88   | myeloid differentiation primary response gene 88                          | 47   | 42   | 47   |
| 17877     | Myf5    | myogenic factor 5                                                         | 282  | 286  | 289  |
| 17878     | Myf6    | myogenic factor 6                                                         | 295  | 294  | 285  |
| 17879     | Myh1    | myosin, heavy polypeptide 1, skeletal muscle, adult                       | 84   | 84   | 86   |
| 77579     | Myh10   | myosin, heavy polypeptide 10, non-muscle                                  | 353  | 344  | 348  |
| 17880     | Myh11   | myosin, heavy polypeptide 11, smooth muscle                               | 204  | 200  | 202  |
| 71960     | Myh14   | myosin, heavy polypeptide 14                                              | 142  | 144  | 151  |
| 17884     | Myh4    | myosin, heavy polypeptide 4, skeletal muscle                              | 93   | 94   | 95   |
| 17888     | Myh6    | myosin, heavy polypeptide 6, cardiac muscle, alpha                        | 25   | 23   | 25   |
| 140781    | Myh7    | myosin, heavy polypeptide 7, cardiac muscle, beta                         | 51   | 46   | 53   |
| 17885     | Myh8    | myosin, heavy polypeptide 8, skeletal muscle, perinatal                   | 111  | 108  | 108  |
| 17886     | Myh9    | myosin, heavy polypeptide 9, non-muscle                                   | 223  | 226  | 216  |
| 17904     | Myl6    | myosin, light polypeptide 6, alkali, smooth muscle and non-muscle         | 49   | 50   | 50   |
| 216459    | Myl6b   | myosin, light polypeptide 6B                                              | 42   | 37   | 38   |
| 218203    | Myliip  | myosin regulatory light chain interacting protein                         | 653  | 636  | 659  |
| 107589    | Mylk    | myosin, light polypeptide kinase                                          | 433  | 423  | 429  |
| 228785    | Mylk2   | myosin, light polypeptide kinase 2, skeletal muscle                       | 106  | 111  | 114  |
| 213435    | Mylk3   | myosin light chain kinase 3                                               | 165  | 166  | 174  |
| 238564    | Mylk4   | myosin light chain kinase family, member 4                                | 601  | 603  | 601  |
| 80732     | Mynn    | myoneurin                                                                 | 59   | 55   | 51   |
| 71602     | Myo1e   | myosin IE                                                                 | 364  | 366  | 373  |

|        |          |                                                             |      |      |      |
|--------|----------|-------------------------------------------------------------|------|------|------|
| 231646 | Myo1h    | myosin 1H                                                   | 139  | 133  | 132  |
| 667663 | Myo3a    | myosin IIIA                                                 | 1514 | 1537 | 1529 |
| 329421 | Myo3b    | myosin IIIB                                                 | 756  | 747  | 750  |
| 17918  | Myo5a    | myosin VA                                                   | 249  | 244  | 250  |
| 17920  | Myo6     | myosin VI                                                   | 554  | 552  | 580  |
| 17925  | Myo9b    | myosin IXb                                                  | 125  | 125  | 119  |
| 214384 | Myocd    | myocardin                                                   | 742  | 725  | 730  |
| 17927  | Myod1    | myogenic differentiation 1                                  | 198  | 195  | 194  |
| 17928  | Myog     | myogenin                                                    | 128  | 124  | 132  |
| 232934 | Mypop    | Myb-related transcription factor, partner of profilin       | 22   | 21   | 19   |
| 320713 | Mysm1    | myb-like, SWIRM and MPN domains 1                           | 160  | 156  | 147  |
| 67773  | Myst1    | MYST histone acetyltransferase 1                            | 34   | 33   | 37   |
| 217127 | Myst2    | MYST histone acetyltransferase 2                            | 102  | 96   | 102  |
| 244349 | Myst3    | MYST histone acetyltransferase (monocytic leukemia) 3       | 205  | 213  | 214  |
| 54169  | Myst4    | MYST histone acetyltransferase monocytic leukemia 4         | 868  | 881  | 859  |
| 17932  | Myt1     | myelin transcription factor 1                               | 206  | 209  | 199  |
| 17933  | Myt11    | myelin transcription factor 1-like                          | 1534 | 1538 | 1550 |
| 109889 | Mzf1     | myeloid zinc finger 1                                       | 58   | 60   | 60   |
| 80750  | N4bp1    | NEDD4 binding protein 1                                     | 959  | 955  | 970  |
| 333789 | N4bp2    | NEDD4 binding protein 2                                     | 211  | 215  | 209  |
| 67768  | N6amt1   | N-6 adenine-specific DNA methyltransferase 1 (putative)     | 1931 | 1973 | 1919 |
| 68043  | N6amt2   | N-6 adenine-specific DNA methyltransferase 2 (putative)     | 178  | 190  | 178  |
| 56292  | Naa10    | N(alpha)-acetyltransferase 10, NatA catalytic subunit       | 26   | 25   | 21   |
| 74838  | Naa15    | N(alpha)-acetyltransferase 15, NatA auxiliary subunit       | 93   | 94   | 94   |
| 76522  | Naa38    | N(alpha)-acetyltransferase 38, NatC auxiliary subunit       | 439  | 455  | 443  |
| 72117  | Naa50    | N(alpha)-acetyltransferase 50, NatE catalytic subunit       | 47   | 47   | 39   |
| 67111  | Naaa     | N-acyl ethanolamine acid amidase                            | 77   | 71   | 75   |
| 72560  | Naalad2  | N-acetylated alpha-linked acidic dipeptidase 2              | 135  | 150  | 141  |
| 381204 | Naaladl1 | N-acetylated alpha-linked acidic dipeptidase-like 1         | 43   | 42   | 47   |
| 17936  | Nab1     | Ngfi-A binding protein 1                                    | 505  | 507  | 492  |
| 17937  | Nab2     | Ngfi-A binding protein 2                                    | 47   | 47   | 37   |
| 17938  | Naca     | nascent polypeptide-associated complex alpha polypeptide    | 52   | 54   | 49   |
| 66830  | Nacc1    | nucleus accumbens associated 1, BEN and BTB (POZ) domain co | 35   | 31   | 34   |
| 192185 | Nadk     | NAD kinase                                                  | 148  | 142  | 146  |
| 78914  | Nadsyn1  | NAD synthetase 1                                            | 52   | 49   | 51   |
| 234664 | Nae1     | NEDD8 activating enzyme E1 subunit 1                        | 41   | 38   | 41   |
| 234344 | Naf1     | nuclear assembly factor 1 homolog (S. cerevisiae)           | 1005 | 1011 | 989  |
| 17939  | Naga     | N-acetyl galactosaminidase, alpha                           | 56   | 51   | 57   |
| 56174  | Nagk     | N-acetylglucosamine kinase                                  | 78   | 73   | 75   |
| 217214 | Nags     | N-acetylglutamate synthase                                  | 63   | 64   | 60   |
| 17940  | Naip1    | NLR family, apoptosis inhibitory protein 1                  | 226  | 227  | 228  |
| 59027  | Nampt    | nicotinamide phosphoribosyltransferase                      | 739  | 714  | 710  |
| 71950  | Nanog    | Nanog homeobox                                              | 107  | 114  | 107  |
| 67311  | Nanp     | N-acetylneuraminic acid phosphatase                         | 102  | 111  | 111  |
| 94181  | Nans     | N-acetylneuraminic acid synthase (sialic acid synthase)     | 108  | 110  | 106  |
| 53605  | Nap111   | nucleosome assembly protein 1-like 1                        | 279  | 266  | 269  |
| 17954  | Nap112   | nucleosome assembly protein 1-like 2                        | 406  | 394  | 372  |
| 54561  | Nap113   | nucleosome assembly protein 1-like 3                        | 3358 | 3420 | 3196 |
| 17955  | Nap114   | nucleosome assembly protein 1-like 4                        | 127  | 133  | 126  |
| 58243  | Nap115   | nucleosome assembly protein 1-like 5                        | 233  | 250  | 240  |
| 242864 | Napepld  | N-acyl phosphatidylethanolamine phospholipase D             | 117  | 115  | 117  |
| 223646 | Naprt1   | nicotinate phosphoribosyltransferase domain containing 1    | 54   | 56   | 58   |
| 16541  | Napsa    | napsin A aspartic peptidase                                 | 50   | 44   | 47   |
| 67563  | Narfl    | nuclear prelamin A recognition factor-like                  | 45   | 38   | 43   |
| 70223  | Nars     | asparaginyl-tRNA synthetase                                 | 228  | 235  | 220  |

|        |         |                                                               |      |      |      |
|--------|---------|---------------------------------------------------------------|------|------|------|
| 244141 | Nars2   | asparaginyl-tRNA synthetase 2 (mitochondrial)(putative)       | 1066 | 1073 | 1070 |
| 50927  | Nasp    | nuclear autoantigenic sperm protein (histone-binding)         | 68   | 73   | 77   |
| 17960  | Nat1    | N-acetyl transferase 1                                        | 803  | 791  | 811  |
| 269854 | Nat14   | N-acetyltransferase 14                                        | 11   | 10   | 9    |
| 74763  | Nat15   | N-acetyltransferase 15 (GCN5-related, putative)               | 45   | 42   | 46   |
| 17961  | Nat2    | N-acetyltransferase 2 (arylamine N-acetyltransferase)         | 43   | 48   | 45   |
| 17962  | Nat3    | N-acetyltransferase 3                                         | 416  | 416  | 412  |
| 68396  | Nat8    | N-acetyltransferase 8 (GCN5-related, putative)                | 68   | 60   | 62   |
| 269642 | Nat8l   | N-acetyltransferase 8-like                                    | 238  | 229  | 233  |
| 27354  | Nbn     | nibrin                                                        | 90   | 95   | 87   |
| 17966  | Nbr1    | neighbor of Brca1 gene 1                                      | 40   | 43   | 40   |
| 68298  | Ncapd2  | non-SMC condensin I complex, subunit D2                       | 7    | 6    | 5    |
| 78658  | Ncapd3  | non-SMC condensin II complex, subunit D3                      | 159  | 166  | 167  |
| 54392  | Ncapg   | non-SMC condensin I complex, subunit G                        | 112  | 109  | 103  |
| 76044  | Ncapg2  | non-SMC condensin II complex, subunit G2                      | 109  | 104  | 102  |
| 215387 | Ncaph   | non-SMC condensin I complex, subunit H                        | 91   | 89   | 92   |
| 52683  | Ncaph2  | non-SMC condensin II complex, subunit H2                      | 25   | 25   | 26   |
| 433702 | Ncbp1   | nuclear cap binding protein subunit 1                         | 73   | 75   | 78   |
| 68092  | Ncbp2   | nuclear cap binding protein subunit 2                         | 77   | 72   | 71   |
| 320024 | Nceh1   | arylacetamide deacetylase-like 1                              | 220  | 213  | 215  |
| 17969  | Ncf1    | neutrophil cytosolic factor 1                                 | 162  | 173  | 169  |
| 17970  | Ncf2    | neutrophil cytosolic factor 2                                 | 146  | 141  | 151  |
| 17973  | Nck1    | non-catalytic region of tyrosine kinase adaptor protein 1     | 116  | 107  | 100  |
| 17974  | Nck2    | non-catalytic region of tyrosine kinase adaptor protein 2     | 727  | 726  | 709  |
| 105855 | Nckap1l | NCK associated protein 1 like                                 | 64   | 71   | 71   |
| 103425 | Ncln    | nicalin homolog (zebrafish)                                   | 19   | 20   | 21   |
| 17977  | Ncoa1   | nuclear receptor coactivator 1                                | 448  | 432  | 441  |
| 17978  | Ncoa2   | nuclear receptor coactivator 2                                | 604  | 587  | 596  |
| 17979  | Ncoa3   | nuclear receptor coactivator 3                                | 346  | 347  | 369  |
| 228869 | Ncoa5   | nuclear receptor coactivator 5                                | 113  | 115  | 114  |
| 56406  | Ncoa6   | nuclear receptor coactivator 6                                | 166  | 167  | 165  |
| 211329 | Ncoa7   | nuclear receptor coactivator 7                                | 466  | 481  | 461  |
| 20185  | Ncor1   | nuclear receptor co-repressor 1                               | 238  | 225  | 223  |
| 20602  | Ncor2   | nuclear receptor co-repressor 2                               | 447  | 407  | 410  |
| 59287  | Ncstn   | nicastrin                                                     | 57   | 59   | 59   |
| 65113  | Ndfip1  | Nedd4 family interacting protein 1                            | 353  | 347  | 338  |
| 76273  | Ndfip2  | Nedd4 family interacting protein 2                            | 933  | 926  | 904  |
| 17984  | Ndn     | necdin                                                        | 413  | 422  | 416  |
| 78797  | Ndor1   | NADPH dependent diflavin oxidoreductase 1                     | 17   | 14   | 14   |
| 17986  | Ndp     | Norrie disease (pseudoglioma) (human)                         | 617  | 634  | 575  |
| 15531  | Ndst1   | N-deacetylase/N-sulfotransferase (heparan glucosaminyl) 1     | 197  | 200  | 201  |
| 17423  | Ndst2   | N-deacetylase/N-sulfotransferase (heparan glucosaminyl) 2     | 109  | 113  | 103  |
| 83398  | Ndst3   | N-deacetylase/N-sulfotransferase (heparan glucosaminyl) 3     | 1042 | 1023 | 1034 |
| 64580  | Ndst4   | N-deacetylase/N-sulfotransferase (heparin glucosaminyl) 4     | 1707 | 1716 | 1653 |
| 54405  | Ndufa1  | NADH dehydrogenase (ubiquinone) 1 alpha subcomplex, 1         | 31   | 31   | 27   |
| 67273  | Ndufa10 | NADH dehydrogenase (ubiquinone) 1 alpha subcomplex 10         | 431  | 421  | 423  |
| 66414  | Ndufa12 | NADH dehydrogenase (ubiquinone) 1 alpha subcomplex, 12        | 195  | 196  | 196  |
| 67184  | Ndufa13 | NADH dehydrogenase (ubiquinone) 1 alpha subcomplex, 13        | 87   | 93   | 91   |
| 17991  | Ndufa2  | NADH dehydrogenase (ubiquinone) 1 alpha subcomplex, 2         | 12   | 10   | 11   |
| 66091  | Ndufa3  | NADH dehydrogenase (ubiquinone) 1 alpha subcomplex, 3         | 19   | 18   | 18   |
| 17992  | Ndufa4  | NADH dehydrogenase (ubiquinone) 1 alpha subcomplex, 4         | 1205 | 1219 | 1181 |
| 68202  | Ndufa5  | NADH dehydrogenase (ubiquinone) 1 alpha subcomplex, 5         | 16   | 14   | 14   |
| 67130  | Ndufa6  | NADH dehydrogenase (ubiquinone) 1 alpha subcomplex, 6 (B14)   | 40   | 42   | 44   |
| 66416  | Ndufa7  | NADH dehydrogenase (ubiquinone) 1 alpha subcomplex, 7 (B14.5) | 24   | 22   | 25   |
| 68375  | Ndufa8  | NADH dehydrogenase (ubiquinone) 1 alpha subcomplex, 8         | 93   | 85   | 88   |

|        |         |                                                                   |     |     |     |
|--------|---------|-------------------------------------------------------------------|-----|-----|-----|
| 66108  | Ndufa9  | NADH dehydrogenase (ubiquinone) 1 alpha subcomplex, 9             | 150 | 147 | 147 |
| 70316  | Ndufab1 | NADH dehydrogenase (ubiquinone) 1, alpha/beta subcomplex, 1       | 89  | 88  | 90  |
| 69702  | Ndufaf1 | NADH dehydrogenase (ubiquinone) 1 alpha subcomplex, assembly      | 71  | 79  | 72  |
| 75597  | Ndufaf2 | NADH dehydrogenase (ubiquinone) 1 alpha subcomplex, assembly      | 148 | 149 | 141 |
| 68342  | Ndufb10 | NADH dehydrogenase (ubiquinone) 1 beta subcomplex, 10             | 7   | 8   | 7   |
| 68198  | Ndufb2  | NADH dehydrogenase (ubiquinone) 1 beta subcomplex, 2              | 197 | 191 | 200 |
| 66495  | Ndufb3  | NADH dehydrogenase (ubiquinone) 1 beta subcomplex 3               | 142 | 141 | 137 |
| 66046  | Ndufb5  | NADH dehydrogenase (ubiquinone) 1 beta subcomplex, 5              | 94  | 105 | 102 |
| 230075 | Ndufb6  | NADH dehydrogenase (ubiquinone) 1 beta subcomplex, 6              | 265 | 268 | 253 |
| 66916  | Ndufb7  | NADH dehydrogenase (ubiquinone) 1 beta subcomplex, 7              | 52  | 62  | 59  |
| 66218  | Ndufb9  | NADH dehydrogenase (ubiquinone) 1 beta subcomplex, 9              | 188 | 190 | 193 |
| 66377  | Ndufc1  | NADH dehydrogenase (ubiquinone) 1, subcomplex unknown, 1          | 26  | 27  | 29  |
| 68197  | Ndufc2  | NADH dehydrogenase (ubiquinone) 1, subcomplex unknown, 2          | 63  | 63  | 57  |
| 227197 | Ndufs1  | NADH dehydrogenase (ubiquinone) Fe-S protein 1                    | 83  | 80  | 78  |
| 226646 | Ndufs2  | NADH dehydrogenase (ubiquinone) Fe-S protein 2                    | 20  | 20  | 20  |
| 68349  | Ndufs3  | NADH dehydrogenase (ubiquinone) Fe-S protein 3                    | 24  | 23  | 25  |
| 17993  | Ndufs4  | NADH dehydrogenase (ubiquinone) Fe-S protein 4                    | 848 | 871 | 857 |
| 595136 | Ndufs5  | NADH dehydrogenase (ubiquinone) Fe-S protein 5                    | 43  | 43  | 40  |
| 407785 | Ndufs6  | NADH dehydrogenase (ubiquinone) Fe-S protein 6                    | 89  | 96  | 93  |
| 75406  | Ndufs7  | NADH dehydrogenase (ubiquinone) Fe-S protein 7                    | 43  | 41  | 47  |
| 225887 | Ndufs8  | NADH dehydrogenase (ubiquinone) Fe-S protein 8                    | 28  | 30  | 31  |
| 17995  | Ndufv1  | NADH dehydrogenase (ubiquinone) flavoprotein 1                    | 41  | 43  | 42  |
| 72900  | Ndufv2  | NADH dehydrogenase (ubiquinone) flavoprotein 2                    | 42  | 49  | 46  |
| 78330  | Ndufv3  | NADH dehydrogenase (ubiquinone) flavoprotein 3                    | 64  | 68  | 67  |
| 56846  | Necab3  | N-terminal EF-hand calcium binding protein 3                      | 20  | 21  | 23  |
| 17999  | Nedd4   | neural precursor cell expressed, developmentally down-regulated 4 | 360 | 361 | 352 |
| 83814  | Nedd4l  | neural precursor cell expressed, developmentally down-regulated 4 | 924 | 927 | 921 |
| 18002  | Nedd8   | neural precursor cell expressed, developmentally down-regulated 8 | 16  | 16  | 15  |
| 72774  | Neil1   | nei endonuclease VIII-like 1 (E. coli)                            | 29  | 33  | 32  |
| 234258 | Neil3   | nei like 3 (E. coli)                                              | 705 | 703 | 703 |
| 18004  | Nek1    | NIMA (never in mitosis gene a)-related expressed kinase 1         | 296 | 305 | 293 |
| 208583 | Nek11   | NIMA (never in mitosis gene a)-related expressed kinase 11        | 326 | 326 | 330 |
| 18005  | Nek2    | NIMA (never in mitosis gene a)-related expressed kinase 2         | 241 | 236 | 242 |
| 23954  | Nek3    | NIMA (never in mitosis gene a)-related expressed kinase 3         | 90  | 89  | 90  |
| 23955  | Nek4    | NIMA (never in mitosis gene a)-related expressed kinase 4         | 71  | 71  | 77  |
| 330721 | Nek5    | NIMA (never in mitosis gene a)-related expressed kinase 5         | 127 | 132 | 134 |
| 59126  | Nek6    | NIMA (never in mitosis gene a)-related expressed kinase 6         | 388 | 386 | 380 |
| 59125  | Nek7    | NIMA (never in mitosis gene a)-related expressed kinase 7         | 721 | 727 | 721 |
| 140859 | Nek8    | NIMA (never in mitosis gene a)-related expressed kinase 8         | 16  | 14  | 17  |
| 217718 | Nek9    | NIMA (never in mitosis gene a)-related expressed kinase 9         | 109 | 119 | 118 |
| 66650  | Nepn    | nephrocan                                                         | 48  | 49  | 42  |
| 56802  | Nespas  | neuroendocrine secretory protein antisense                        | 17  | 15  | 17  |
| 18010  | Neu1    | neuraminidase 1                                                   | 44  | 50  | 44  |
| 23956  | Neu2    | neuraminidase 2                                                   | 80  | 80  | 83  |
| 50877  | Neu3    | neuraminidase 3                                                   | 121 | 119 | 113 |
| 241159 | Neu4    | sialidase 4                                                       | 83  | 83  | 86  |
| 18012  | Neurod1 | neurogenic differentiation 1                                      | 267 | 269 | 250 |
| 18013  | Neurod2 | neurogenic differentiation 2                                      | 174 | 176 | 165 |
| 11923  | Neurod4 | neurogenic differentiation 4                                      | 133 | 140 | 136 |
| 11922  | Neurod6 | neurogenic differentiation 6                                      | 484 | 490 | 484 |
| 18014  | Neurog1 | neurogenin 1                                                      | 150 | 145 | 141 |
| 11924  | Neurog2 | neurogenin 2                                                      | 274 | 273 | 275 |
| 11925  | Neurog3 | neurogenin 3                                                      | 157 | 155 | 151 |
| 18016  | Nf2     | neurofibromatosis 2                                               | 173 | 167 | 171 |
| 54446  | Nfat5   | nuclear factor of activated T-cells 5                             | 321 | 322 | 304 |

|           |          |                                                                            |      |      |      |
|-----------|----------|----------------------------------------------------------------------------|------|------|------|
| 18018     | Nfatc1   | nuclear factor of activated T-cells, cytoplasmic, calcineurin-depend       | 486  | 491  | 481  |
| 18019     | Nfatc2   | nuclear factor of activated T-cells, cytoplasmic, calcineurin-depend       | 619  | 607  | 599  |
| 18021     | Nfatc3   | nuclear factor of activated T-cells, cytoplasmic, calcineurin-depend       | 177  | 171  | 167  |
| 73181     | Nfatc4   | nuclear factor of activated T-cells, cytoplasmic, calcineurin-depend       | 83   | 76   | 75   |
| 18022     | Nfe2     | nuclear factor, erythroid derived 2                                        | 40   | 39   | 42   |
| 18024     | Nfe2l2   | nuclear factor, erythroid derived 2, like 2                                | 216  | 229  | 226  |
| 18025     | Nfe2l3   | nuclear factor, erythroid derived 2, like 3                                | 257  | 256  | 253  |
| 18027     | Nfia     | nuclear factor I/A                                                         | 2033 | 2028 | 2023 |
| 18028     | Nfib     | nuclear factor I/B                                                         | 1813 | 1813 | 1793 |
| 18029     | Nfic     | nuclear factor I/C                                                         | 106  | 103  | 105  |
| 18030     | Nfil3    | nuclear factor, interleukin 3, regulated                                   | 480  | 466  | 451  |
| 18032     | Nfix     | nuclear factor I/X                                                         | 183  | 162  | 174  |
| 18033     | Nfkb1    | nuclear factor of kappa light polypeptide gene enhancer in B-cells         | 427  | 433  | 426  |
| 18034     | Nfkb2    | nuclear factor of kappa light polypeptide gene enhancer in B-cells         | 229  | 227  | 226  |
| 18035     | Nfkbia   | nuclear factor of kappa light polypeptide gene enhancer in B-cells i       | 212  | 208  | 212  |
| 18037     | Nfkbie   | nuclear factor of kappa light polypeptide gene enhancer in B-cells i       | 17   | 16   | 15   |
| 80859     | Nfkbiz   | nuclear factor of kappa light polypeptide gene enhancer in B-cells i       | 788  | 805  | 789  |
| 235134    | Nfrkb    | nuclear factor related to kappa B binding protein                          | 202  | 193  | 200  |
| 56748     | Nfu1     | NFU1 iron-sulfur cluster scaffold homolog ( <i>S. cerevisiae</i> )         | 254  | 253  | 254  |
| 74164     | Nfx1     | nuclear transcription factor, X-box binding 1                              | 59   | 52   | 60   |
| 18044     | Nfya     | nuclear transcription factor-Y alpha                                       | 66   | 63   | 64   |
| 18045     | Nfyb     | nuclear transcription factor-Y beta                                        | 147  | 143  | 139  |
| 18046     | Nfyc     | nuclear transcription factor-Y gamma                                       | 150  | 143  | 138  |
| 18049     | Ngf      | nerve growth factor                                                        | 681  | 678  | 679  |
| 59007     | Ngly1    | N-glycanase 1                                                              | 1037 | 1041 | 1044 |
| 75570     | Nhej1    | nonhomologous end-joining factor 1                                         | 138  | 131  | 132  |
| 18071     | Nhlh1    | nescient helix loop helix 1                                                | 69   | 70   | 67   |
| 105193    | Nhlrc1   | NHL repeat containing 1                                                    | 149  | 143  | 146  |
| 52530     | Nhp2     | NHP2 ribonucleoprotein homolog (yeast)                                     | 37   | 38   | 38   |
| 80885     | Niacr1   | niacin receptor 1                                                          | 173  | 171  | 167  |
| 65102     | Nif3l1   | Ngg1 interacting factor 3-like 1 ( <i>S. pombe</i> )                       | 79   | 79   | 79   |
| 71175     | Nipbl    | Nipped-B homolog ( <i>Drosophila</i> )                                     | 688  | 696  | 671  |
| 64652     | Nisch    | nischarin                                                                  | 53   | 54   | 52   |
| 27045     | Nit1     | nitrilase 1                                                                | 19   | 19   | 20   |
| 52633     | Nit2     | nitrilase family, member 2                                                 | 146  | 143  | 142  |
| 67050     | Nkap     | NFKB activating protein                                                    | 70   | 73   | 73   |
| 69721     | Nkiras1  | NFKB inhibitor interacting Ras-like protein 1                              | 76   | 80   | 79   |
| 71966     | Nkiras2  | NFKB inhibitor interacting Ras-like protein 2                              | 41   | 36   | 37   |
| 77286     | Nkrf     | NF-kappaB repressing factor                                                | 151  | 151  | 137  |
| 18087     | Nktr     | natural killer tumor recognition sequence                                  | 61   | 69   | 60   |
| 21869     | Nkx2-1   | NK2 homeobox 1                                                             | 338  | 344  | 342  |
| 18088     | Nkx2-2   | NK2 transcription factor related, locus 2 ( <i>Drosophila</i> )            | 232  | 223  | 227  |
| 100313531 | Nkx2-2as | NK2 transcription factor related, locus 2 ( <i>Drosophila</i> ), antisense | 136  | 130  | 126  |
| 18089     | Nkx2-3   | NK2 transcription factor related, locus 3 ( <i>Drosophila</i> )            | 189  | 191  | 197  |
| 18091     | Nkx2-5   | NK2 transcription factor related, locus 5 ( <i>Drosophila</i> )            | 168  | 160  | 169  |
| 18092     | Nkx2-6   | NK2 transcription factor related, locus 6 ( <i>Drosophila</i> )            | 211  | 203  | 203  |
| 18094     | Nkx2-9   | NK2 transcription factor related, locus 9 ( <i>Drosophila</i> )            | 203  | 206  | 197  |
| 18095     | Nkx3-1   | NK-3 transcription factor, locus 1 ( <i>Drosophila</i> )                   | 151  | 153  | 147  |
| 12020     | Nkx3-2   | NK3 homeobox 2                                                             | 170  | 168  | 167  |
| 18096     | Nkx6-1   | NK6 homeobox 1                                                             | 1174 | 1150 | 1145 |
| 14912     | Nkx6-2   | NK6 homeobox 2                                                             | 563  | 567  | 570  |
| 74561     | Nkx6-3   | NK6 homeobox 3                                                             | 77   | 75   | 84   |
| 18099     | Nlk      | nemo like kinase                                                           | 261  | 264  | 251  |
| 75805     | Nln      | neurolysin (metallopeptidase M3 family)                                    | 244  | 257  | 245  |
| 434341    | Nlrc5    | NLR family, CARD domain containing 5                                       | 119  | 117  | 125  |

|        |         |                                                                    |      |      |      |
|--------|---------|--------------------------------------------------------------------|------|------|------|
| 378425 | Nlrp12  | NLR family, pyrin domain containing 12                             | 76   | 67   | 72   |
| 18102  | Nme1    | non-metastatic cells 1, protein (NM23A) expressed in               | 52   | 51   | 51   |
| 18103  | Nme2    | non-metastatic cells 2, protein (NM23B) expressed in               | 108  | 109  | 105  |
| 79059  | Nme3    | non-metastatic cells 3, protein expressed in                       | 52   | 52   | 51   |
| 56520  | Nme4    | non-metastatic cells 4, protein expressed in                       | 30   | 27   | 28   |
| 75533  | Nme5    | non-metastatic cells 5, protein expressed in (nucleoside-diphospha | 71   | 66   | 74   |
| 54369  | Nme6    | non-metastatic cells 6, protein expressed in (nucleoside-diphospha | 26   | 21   | 24   |
| 66454  | Nmnat1  | nicotinamide nucleotide adenyllyltransferase 1                     | 37   | 37   | 43   |
| 226518 | Nmnat2  | nicotinamide nucleotide adenyllyltransferase 2                     | 380  | 358  | 371  |
| 74080  | Nmnat3  | nicotinamide nucleotide adenyllyltransferase 3                     | 491  | 509  | 486  |
| 18107  | Nmt1    | N-myristoyltransferase 1                                           | 116  | 119  | 109  |
| 18108  | Nmt2    | N-myristoyltransferase 2                                           | 279  | 278  | 274  |
| 18113  | Nnmt    | nicotinamide N-methyltransferase                                   | 450  | 446  | 437  |
| 67619  | Nob1    | NIN1/RPN12 binding protein 1 homolog (S. cerevisiae)               | 42   | 43   | 37   |
| 18291  | Nobox   | NOBOX oogenesis homeobox                                           | 526  | 524  | 516  |
| 107607 | Nod1    | nucleotide-binding oligomerization domain containing 1             | 241  | 236  | 234  |
| 257632 | Nod2    | nucleotide-binding oligomerization domain containing 2             | 75   | 76   | 76   |
| 18119  | Nodal   | nodal                                                              | 89   | 88   | 90   |
| 18121  | Nog     | noggin                                                             | 443  | 439  | 438  |
| 78688  | Nol3    | nucleolar protein 3 (apoptosis repressor with CARD domain)         | 20   | 25   | 20   |
| 70930  | Nol8    | nucleolar protein 8                                                | 37   | 35   | 33   |
| 74035  | Nol9    | nucleolar protein 9                                                | 80   | 74   | 78   |
| 70769  | Nolc1   | nucleolar and coiled-body phosphoprotein 1                         | 96   | 98   | 102  |
| 433864 | Nom1    | nucleolar protein with MIF4G domain 1                              | 130  | 131  | 137  |
| 53610  | Nono    | non-POU-domain-containing, octamer binding protein                 | 31   | 32   | 34   |
| 66181  | Nop10   | NOP10 ribonucleoprotein homolog (yeast)                            | 10   | 10   | 10   |
| 75416  | Nop14   | NOP14 nucleolar protein homolog (yeast)                            | 25   | 28   | 26   |
| 18125  | Nos1    | nitric oxide synthase 1, neuronal                                  | 722  | 709  | 727  |
| 18126  | Nos2    | nitric oxide synthase 2, inducible                                 | 201  | 206  | 201  |
| 18127  | Nos3    | nitric oxide synthase 3, endothelial cell                          | 52   | 49   | 48   |
| 329416 | Nostrin | nitric oxide synthase trafficker                                   | 444  | 453  | 434  |
| 18128  | Notch1  | Notch gene homolog 1 (Drosophila)                                  | 166  | 165  | 168  |
| 18129  | Notch2  | Notch gene homolog 2 (Drosophila)                                  | 295  | 310  | 310  |
| 18131  | Notch3  | Notch gene homolog 3 (Drosophila)                                  | 124  | 124  | 121  |
| 18132  | Notch4  | Notch gene homolog 4 (Drosophila)                                  | 54   | 52   | 50   |
| 384452 | Noto    | notochord homolog (Xenopus laevis)                                 | 74   | 67   | 72   |
| 664883 | Nova1   | neuro-oncological ventral antigen 1                                | 5353 | 5477 | 5338 |
| 237038 | Nox1    | NADPH oxidase 1                                                    | 108  | 106  | 103  |
| 224480 | Nox3    | NADPH oxidase 3                                                    | 1835 | 1861 | 1824 |
| 50490  | Nox4    | NADPH oxidase 4                                                    | 615  | 644  | 612  |
| 241275 | Noxa1   | NADPH oxidase activator 1                                          | 121  | 124  | 131  |
| 71893  | Noxo1   | NADPH oxidase organizer 1                                          | 11   | 11   | 15   |
| 18142  | Npas1   | neuronal PAS domain protein 1                                      | 218  | 205  | 208  |
| 18143  | Npas2   | neuronal PAS domain protein 2                                      | 486  | 487  | 486  |
| 27386  | Npas3   | neuronal PAS domain protein 3                                      | 1902 | 1949 | 1859 |
| 225872 | Npas4   | neuronal PAS domain protein 4                                      | 81   | 71   | 81   |
| 244879 | Npat    | nuclear protein in the AT region                                   | 92   | 92   | 98   |
| 208990 | Npb     | neuropeptide B                                                     | 25   | 22   | 23   |
| 18145  | Npc1    | Niemann Pick type C1                                               | 176  | 177  | 178  |
| 237636 | Npc1l1  | NPC1-like 1                                                        | 87   | 86   | 91   |
| 228961 | Npepl1  | aminopeptidase-like 1                                              | 235  | 239  | 239  |
| 19155  | Npepps  | aminopeptidase puromycin sensitive                                 | 164  | 172  | 169  |
| 74025  | Nphp3   | nephronophthisis 3 (adolescent)                                    | 386  | 407  | 384  |
| 74091  | Npl     | N-acetylneuraminatate pyruvate lyase                               | 209  | 213  | 221  |
| 18148  | Npm1    | nucleophosmin 1                                                    | 70   | 65   | 72   |

|           |       |                                                             |      |      |      |
|-----------|-------|-------------------------------------------------------------|------|------|------|
| 328440    | Npm2  | nucleophosmin/nucleoplasmin 2                               | 162  | 168  | 160  |
| 18150     | Npm3  | nucleoplasmin 3                                             | 48   | 50   | 52   |
| 230899    | Nppa  | natriuretic peptide type A                                  | 64   | 64   | 66   |
| 18158     | Nppb  | natriuretic peptide type B                                  | 79   | 80   | 79   |
| 18159     | Nppc  | natriuretic peptide type C                                  | 154  | 154  | 143  |
| 18160     | Npr1  | natriuretic peptide receptor 1                              | 53   | 52   | 55   |
| 230103    | Npr2  | natriuretic peptide receptor 2                              | 90   | 82   | 97   |
| 18162     | Npr3  | natriuretic peptide receptor 3                              | 758  | 764  | 766  |
| 56032     | Nprl2 | nitrogen permease regulator-like 2 ( <i>S. cerevisiae</i> ) | 7    | 7    | 7    |
| 20320     | Nptn  | neuroplastin                                                | 268  | 260  | 265  |
| 18166     | Npy1r | neuropeptide Y receptor Y1                                  | 216  | 231  | 227  |
| 18167     | Npy2r | neuropeptide Y receptor Y2                                  | 687  | 665  | 660  |
| 18104     | Nqo1  | NAD(P)H dehydrogenase, quinone 1                            | 179  | 179  | 177  |
| 18105     | Nqo2  | NAD(P)H dehydrogenase, quinone 2                            | 91   | 92   | 84   |
| 11614     | Nr0b1 | nuclear receptor subfamily 0, group B, member 1             | 252  | 252  | 232  |
| 23957     | Nr0b2 | nuclear receptor subfamily 0, group B, member 2             | 39   | 37   | 34   |
| 217166    | Nr1d1 | nuclear receptor subfamily 1, group D, member 1             | 68   | 59   | 59   |
| 353187    | Nr1d2 | nuclear receptor subfamily 1, group D, member 2             | 367  | 372  | 372  |
| 22260     | Nr1h2 | nuclear receptor subfamily 1, group H, member 2             | 23   | 25   | 29   |
| 22259     | Nr1h3 | nuclear receptor subfamily 1, group H, member 3             | 23   | 26   | 23   |
| 20186     | Nr1h4 | nuclear receptor subfamily 1, group H, member 4             | 269  | 265  | 269  |
| 381463    | Nr1h5 | nuclear receptor subfamily 1, group H, member 5             | 78   | 80   | 74   |
| 18171     | Nr1i2 | nuclear receptor subfamily 1, group I, member 2             | 316  | 318  | 319  |
| 12355     | Nr1i3 | nuclear receptor subfamily 1, group I, member 3             | 35   | 38   | 36   |
| 22025     | Nr2c1 | nuclear receptor subfamily 2, group C, member 1             | 217  | 204  | 203  |
| 22026     | Nr2c2 | nuclear receptor subfamily 2, group C, member 2             | 248  | 257  | 254  |
| 21907     | Nr2e1 | nuclear receptor subfamily 2, group E, member 1             | 223  | 217  | 225  |
| 23958     | Nr2e3 | nuclear receptor subfamily 2, group E, member 3             | 259  | 261  | 255  |
| 13865     | Nr2f1 | nuclear receptor subfamily 2, group F, member 1             | 3549 | 3681 | 3542 |
| 11819     | Nr2f2 | nuclear receptor subfamily 2, group F, member 2             | 4526 | 4523 | 4533 |
| 13864     | Nr2f6 | nuclear receptor subfamily 2, group F, member 6             | 27   | 24   | 28   |
| 14815     | Nr3c1 | nuclear receptor subfamily 3, group C, member 1             | 999  | 994  | 980  |
| 110784    | Nr3c2 | nuclear receptor subfamily 3, group C, member 2             | 781  | 771  | 774  |
| 15370     | Nr4a1 | nuclear receptor subfamily 4, group A, member 1             | 70   | 74   | 77   |
| 18227     | Nr4a2 | nuclear receptor subfamily 4, group A, member 2             | 2266 | 2266 | 2226 |
| 18124     | Nr4a3 | nuclear receptor subfamily 4, group A, member 3             | 811  | 811  | 813  |
| 26423     | Nr5a1 | nuclear receptor subfamily 5, group A, member 1             | 173  | 171  | 179  |
| 26424     | Nr5a2 | nuclear receptor subfamily 5, group A, member 2             | 1679 | 1658 | 1640 |
| 14536     | Nr6a1 | nuclear receptor subfamily 6, group A, member 1             | 291  | 294  | 288  |
| 67122     | Nrarp | Notch-regulated ankyrin repeat protein                      | 132  | 128  | 130  |
| 18176     | Nras  | neuroblastoma ras oncogene                                  | 74   | 72   | 72   |
| 641340    | Nrbf2 | nuclear receptor binding factor 2                           | 517  | 528  | 515  |
| 192292    | Nrbp1 | nuclear receptor binding protein 1                          | 35   | 41   | 36   |
| 223649    | Nrbp2 | nuclear receptor binding protein 2                          | 47   | 49   | 43   |
| 230598    | Nrd1  | nardilysin, N-arginine dibasic convertase, NRD convertase 1 | 179  | 178  | 179  |
| 18181     | Nrf1  | nuclear respiratory factor 1                                | 365  | 370  | 358  |
| 211323    | Nrg1  | neuregulin 1                                                | 2268 | 2294 | 2242 |
| 100042150 | Nrg2  | neuregulin 2                                                | 219  | 226  | 234  |
| 268903    | Nrip1 | nuclear receptor interacting protein 1                      | 1433 | 1420 | 1379 |
| 60345     | Nrip2 | nuclear receptor interacting protein 2                      | 69   | 64   | 62   |
| 78593     | Nrip3 | nuclear receptor interacting protein 3                      | 148  | 152  | 146  |
| 27206     | Nrk   | Nik related kinase                                          | 1050 | 1052 | 1004 |
| 18185     | Nrl   | neural retina leucine zipper gene                           | 41   | 41   | 38   |
| 18186     | Nrp1  | neuropilin 1                                                | 1381 | 1377 | 1382 |
| 18193     | Nsd1  | nuclear receptor-binding SET-domain protein 1               | 217  | 217  | 217  |

|        |        |                                                                    |      |      |      |
|--------|--------|--------------------------------------------------------------------|------|------|------|
| 18194  | Nsdhl  | NAD(P) dependent steroid dehydrogenase-like                        | 92   | 84   | 87   |
| 18195  | Nsf    | N-ethylmaleimide sensitive fusion protein                          | 247  | 253  | 256  |
| 67711  | Nsmce1 | non-SMC element 1 homolog ( <i>S. cerevisiae</i> )                 | 138  | 136  | 146  |
| 68501  | Nsmce2 | non-SMC element 2 homolog (MMS21, <i>S. cerevisiae</i> )           | 350  | 353  | 348  |
| 28114  | Nsun2  | NOL1/NOP2/Sun domain family member 2                               | 167  | 162  | 169  |
| 106338 | Nsun3  | NOL1/NOP2/Sun domain family member 3                               | 2783 | 2851 | 2773 |
| 72181  | Nsun4  | NOL1/NOP2/Sun domain family, member 4                              | 72   | 75   | 81   |
| 100609 | Nsun5  | NOL1/NOP2/Sun domain family, member 5                              | 51   | 51   | 50   |
| 74455  | Nsun6  | NOL1/NOP2/Sun domain family member 6                               | 415  | 441  | 434  |
| 70918  | Nsun7  | NOL1/NOP2/Sun domain family, member 7                              | 247  | 244  | 230  |
| 50773  | Nt5c   | 5',3'-nucleotidase, cytosolic                                      | 53   | 45   | 55   |
| 230718 | Nt5c1a | 5'-nucleotidase, cytosolic IA                                      | 65   | 62   | 64   |
| 70881  | Nt5c1b | 5'-nucleotidase, cytosolic IB                                      | 1016 | 1041 | 1015 |
| 76952  | Nt5c2  | 5'-nucleotidase, cytosolic II                                      | 386  | 383  | 375  |
| 107569 | Nt5c3  | 5'-nucleotidase, cytosolic III                                     | 155  | 160  | 157  |
| 68106  | Nt5c3l | 5'-nucleotidase, cytosolic III-like                                | 31   | 29   | 30   |
| 23959  | Nt5e   | 5' nucleotidase, ecto                                              | 931  | 909  | 904  |
| 103850 | Nt5m   | 5',3'-nucleotidase, mitochondrial                                  | 138  | 135  | 145  |
| 18203  | Ntan1  | N-terminal Asn amidase                                             | 160  | 151  | 162  |
| 18205  | Ntf3   | neurotrophin 3                                                     | 1077 | 1092 | 1086 |
| 18207  | Nthl1  | nth (endonuclease III)-like 1 ( <i>E.coli</i> )                    | 15   | 14   | 16   |
| 66566  | Ntpcr  | nucleoside-triphosphatase, cancer-related                          | 287  | 290  | 297  |
| 18211  | Ntrk1  | neurotrophic tyrosine kinase, receptor, type 1                     | 31   | 33   | 31   |
| 18212  | Ntrk2  | neurotrophic tyrosine kinase, receptor, type 2                     | 1228 | 1232 | 1219 |
| 18213  | Ntrk3  | neurotrophic tyrosine kinase, receptor, type 3                     | 3160 | 3176 | 3146 |
| 77976  | Nuak1  | NUAK family, SNF1-like kinase, 1                                   | 1039 | 1042 | 1032 |
| 74137  | Nuak2  | NUAK family, SNF1-like kinase, 2                                   | 117  | 121  | 116  |
| 53312  | Nub1   | negative regulator of ubiquitin-like proteins 1                    | 108  | 110  | 115  |
| 26425  | Nubp1  | nucleotide binding protein 1                                       | 69   | 66   | 72   |
| 17766  | Nudt1  | nudix (nucleoside diphosphate linked moiety X)-type motif 1        | 78   | 76   | 75   |
| 102954 | Nudt10 | nudix (nucleoside diphosphate linked moiety X)-type motif 10       | 280  | 281  | 264  |
| 58242  | Nudt11 | nudix (nucleoside diphosphate linked moiety X)-type motif 11       | 497  | 502  | 468  |
| 67993  | Nudt12 | nudix (nucleoside diphosphate linked moiety X)-type motif 12       | 5048 | 5130 | 4940 |
| 214254 | Nudt15 | nudix (nucleoside diphosphate linked moiety X)-type motif 15       | 62   | 59   | 57   |
| 66401  | Nudt2  | nudix (nucleoside diphosphate linked moiety X)-type motif 2        | 51   | 48   | 46   |
| 68219  | Nudt21 | nudix (nucleoside diphosphate linked moiety X)-type motif 21       | 30   | 33   | 30   |
| 68323  | Nudt22 | nudix (nucleoside diphosphate linked moiety X)-type motif 22       | 5    | 3    | 4    |
| 56409  | Nudt3  | nudix (nucleotide diphosphate linked moiety X)-type motif 3        | 92   | 91   | 84   |
| 53893  | Nudt5  | nudix (nucleoside diphosphate linked moiety X)-type motif 5        | 63   | 70   | 64   |
| 67528  | Nudt7  | nudix (nucleoside diphosphate linked moiety X)-type motif 7        | 456  | 461  | 458  |
| 74167  | Nudt9  | nudix (nucleoside diphosphate linked moiety X)-type motif 9        | 71   | 71   | 71   |
| 27275  | Nufip1 | nuclear fragile X mental retardation protein interacting protein 1 | 397  | 399  | 391  |
| 18223  | Numb1  | numb-like                                                          | 118  | 124  | 131  |
| 269966 | Nup98  | nucleoporin 98                                                     | 139  | 143  | 147  |
| 108907 | Nusap1 | nucleolar and spindle associated protein 1                         | 30   | 29   | 29   |
| 18230  | Nxn    | nucleoredoxin                                                      | 222  | 213  | 220  |
| 277154 | Nynrin | NYN domain and retroviral integrase containing                     | 80   | 79   | 74   |
| 246730 | Oas1a  | 2'-5' oligoadenylate synthetase 1A                                 | 33   | 31   | 32   |
| 23960  | Oas1g  | 2'-5' oligoadenylate synthetase 1G                                 | 59   | 55   | 56   |
| 246728 | Oas2   | 2'-5' oligoadenylate synthetase 2                                  | 92   | 95   | 88   |
| 23962  | Oasl2  | 2'-5' oligoadenylate synthetase-like 2                             | 86   | 93   | 84   |
| 18245  | Oaz1   | ornithine decarboxylase antizyme 1                                 | 19   | 15   | 18   |
| 53814  | Oaz3   | ornithine decarboxylase antizyme 3                                 | 40   | 42   | 41   |
| 108689 | Obfc1  | oligonucleotide/oligosaccharide-binding fold containing 1          | 147  | 157  | 150  |
| 109019 | Obfc2a | oligonucleotide/oligosaccharide-binding fold containing 2A         | 819  | 812  | 795  |

|        |         |                                                                      |      |      |      |
|--------|---------|----------------------------------------------------------------------|------|------|------|
| 69917  | Obfc2b  | oligonucleotide/oligosaccharide-binding fold containing 2B           | 12   | 15   | 12   |
| 380698 | Obscn   | obscurin, cytoskeletal calmodulin and titin-interacting RhoGEF       | 243  | 236  | 221  |
| 18256  | Oc90    | otoconin 90                                                          | 251  | 243  | 237  |
| 18431  | Oca2    | oculocutaneous albinism II                                           | 1700 | 1707 | 1662 |
| 18260  | Ocln    | occludin                                                             | 161  | 154  | 152  |
| 320634 | Ocrl    | oculocerebrorenal syndrome of Lowe                                   | 171  | 171  | 169  |
| 18263  | Odc1    | ornithine decarboxylase, structural 1                                | 423  | 428  | 437  |
| 18293  | Ogdh    | oxoglutarate dehydrogenase (lipoamide)                               | 148  | 147  | 153  |
| 270086 | Ogfod1  | 2-oxoglutarate and iron-dependent oxygenase domain containing 1      | 79   | 79   | 79   |
| 66627  | Ogfod2  | 2-oxoglutarate and iron-dependent oxygenase domain containing 2      | 22   | 24   | 22   |
| 18294  | Ogg1    | 8-oxoguanine DNA-glycosylase 1                                       | 47   | 39   | 45   |
| 108155 | Ogt     | O-linked N-acetylglucosamine (GlcNAc) transferase (UDP-N-acety       | 252  | 259  | 245  |
| 67059  | Ola1    | Obg-like ATPase 1                                                    | 386  | 374  | 373  |
| 99035  | Olah    | oleoyl-ACP hydrolase                                                 | 106  | 110  | 112  |
| 50914  | Olig1   | oligodendrocyte transcription factor 1                               | 185  | 183  | 179  |
| 50913  | Olig2   | oligodendrocyte transcription factor 2                               | 264  | 248  | 254  |
| 94222  | Olig3   | oligodendrocyte transcription factor 3                               | 539  | 552  | 545  |
| 108078 | Olr1    | oxidized low density lipoprotein (lectin-like) receptor 1            | 57   | 56   | 49   |
| 67013  | Oma1    | OMA1 homolog, zinc metallopeptidase ( <i>S. cerevisiae</i> )         | 1382 | 1390 | 1382 |
| 15379  | Onecut1 | one cut domain, family member 1                                      | 1102 | 1090 | 1070 |
| 225631 | Onecut2 | one cut domain, family member 2                                      | 302  | 309  | 286  |
| 246086 | Onecut3 | one cut domain, family member 3                                      | 126  | 123  | 120  |
| 67968  | Ooep    | oocyte expressed protein homolog (dog)                               | 36   | 35   | 34   |
| 75475  | Oplah   | 5-oxoprolinase (ATP-hydrolysing)                                     | 44   | 43   | 40   |
| 14539  | Opn1mw  | opsin 1 (cone pigments), medium-wave-sensitive (color blindness,     | 99   | 98   | 102  |
| 12057  | Opn1sw  | opsin 1 (cone pigments), short-wave-sensitive (color blindness, trit | 71   | 67   | 67   |
| 13603  | Opn3    | opsin 3                                                              | 12   | 11   | 11   |
| 30044  | Opn4    | opsin 4 (melanopsin)                                                 | 116  | 111  | 117  |
| 353344 | Opn5    | opsin 5                                                              | 482  | 493  | 485  |
| 18386  | Oprd1   | opioid receptor, delta 1                                             | 180  | 179  | 174  |
| 18390  | Oprm1   | opioid receptor, mu 1                                                | 1361 | 1335 | 1311 |
| 18392  | Orc1    | origin recognition complex, subunit 1                                | 51   | 50   | 52   |
| 18393  | Orc2    | origin recognition complex, subunit 2                                | 190  | 191  | 193  |
| 50793  | Orc3    | origin recognition complex, subunit 3                                | 82   | 82   | 76   |
| 26428  | Orc4    | origin recognition complex, subunit 4                                | 177  | 171  | 166  |
| 26429  | Orc5    | origin recognition complex, subunit 5                                | 280  | 283  | 281  |
| 227102 | Ormdl1  | ORM1-like 1 ( <i>S. cerevisiae</i> )                                 | 19   | 20   | 18   |
| 66844  | Ormdl2  | ORM1-like 2 ( <i>S. cerevisiae</i> )                                 | 23   | 21   | 21   |
| 66612  | Ormdl3  | ORM1-like 3 ( <i>S. cerevisiae</i> )                                 | 64   | 58   | 61   |
| 216440 | Os9     | amplified in osteosarcoma                                            | 116  | 117  | 108  |
| 66246  | Osgep   | O-sialoglycoprotein endopeptidase                                    | 39   | 38   | 37   |
| 72085  | Osgepl1 | O-sialoglycoprotein endopeptidase-like 1                             | 70   | 71   | 71   |
| 18413  | Osm     | oncostatin M                                                         | 50   | 49   | 49   |
| 23967  | Osr1    | odd-skipped related 1 ( <i>Drosophila</i> )                          | 1709 | 1698 | 1671 |
| 107587 | Osr2    | odd-skipped related 2 ( <i>Drosophila</i> )                          | 283  | 281  | 275  |
| 18416  | Otc     | ornithine transcarbamylase                                           | 317  | 325  | 302  |
| 18419  | Otog    | otogelin                                                             | 174  | 165  | 170  |
| 18420  | Otp     | orthopedia homolog ( <i>Drosophila</i> )                             | 230  | 230  | 234  |
| 107260 | Otub1   | OTU domain, ubiquitin aldehyde binding 1                             | 133  | 130  | 133  |
| 68149  | Otub2   | OTU domain, ubiquitin aldehyde binding 2                             | 102  | 107  | 100  |
| 54644  | Otud5   | OTU domain containing 5                                              | 71   | 66   | 64   |
| 170711 | Otud7a  | OTU domain containing 7A                                             | 924  | 937  | 923  |
| 229603 | Otud7b  | OTU domain containing 7B                                             | 128  | 135  | 135  |
| 18424  | Otx2    | orthodenticle homolog 2 ( <i>Drosophila</i> )                        | 286  | 297  | 284  |
| 244199 | Ovch2   | ovochymase 2                                                         | 70   | 74   | 77   |

|        |          |                                                                    |      |      |      |
|--------|----------|--------------------------------------------------------------------|------|------|------|
| 12659  | Ovgp1    | oviductal glycoprotein 1                                           | 52   | 51   | 53   |
| 18426  | Ovol1    | OVO homolog-like 1 (Drosophila)                                    | 71   | 70   | 74   |
| 107586 | Ovol2    | ovo-like 2 (Drosophila)                                            | 128  | 131  | 128  |
| 69089  | Oxa1l    | oxidase assembly 1-like                                            | 169  | 171  | 168  |
| 67041  | Oxct1    | 3-oxoacid CoA transferase 1                                        | 38   | 39   | 37   |
| 64059  | Oxct2a   | 3-oxoacid CoA transferase 2A                                       | 72   | 73   | 77   |
| 353371 | Oxct2b   | 3-oxoacid CoA transferase 2B                                       | 43   | 45   | 45   |
| 218885 | Oxnad1   | oxidoreductase NAD-binding domain containing 1                     | 73   | 78   | 75   |
| 170719 | Oxr1     | oxidation resistance 1                                             | 2045 | 2073 | 2014 |
| 71147  | Oxsm     | 3-oxoacyl-ACP synthase, mitochondrial                              | 147  | 157  | 142  |
| 108737 | Oxsr1    | oxidative-stress responsive 1                                      | 143  | 138  | 131  |
| 18436  | P2rx1    | purinergic receptor P2X, ligand-gated ion channel, 1               | 76   | 79   | 79   |
| 18438  | P2rx4    | purinergic receptor P2X, ligand-gated ion channel 4                | 185  | 171  | 185  |
| 18439  | P2rx7    | purinergic receptor P2X, ligand-gated ion channel, 7               | 120  | 118  | 123  |
| 18441  | P2ry1    | purinergic receptor P2Y, G-protein coupled 1                       | 1103 | 1106 | 1070 |
| 18451  | P4ha1    | procollagen-proline, 2-oxoglutarate 4-dioxygenase (proline 4-hydro | 245  | 231  | 223  |
| 18452  | P4ha2    | procollagen-proline, 2-oxoglutarate 4-dioxygenase (proline 4-hydro | 232  | 240  | 235  |
| 320452 | P4ha3    | procollagen-proline, 2-oxoglutarate 4-dioxygenase (proline 4-hydro | 131  | 144  | 145  |
| 18453  | P4hb     | prolyl 4-hydroxylase, beta polypeptide                             | 36   | 37   | 39   |
| 74443  | P4htm    | prolyl 4-hydroxylase, transmembrane (endoplasmic reticulum)        | 96   | 89   | 91   |
| 18813  | Pa2g4    | proliferation-associated 2G4                                       | 48   | 46   | 51   |
| 18458  | Pabpc1   | poly(A) binding protein, cytoplasmic 1                             | 312  | 307  | 301  |
| 18459  | Pabpc2   | poly(A) binding protein, cytoplasmic 2                             | 929  | 938  | 939  |
| 54196  | Pabpn1   | poly(A) binding protein, nuclear 1                                 | 37   | 36   | 34   |
| 23969  | Pacsin1  | protein kinase C and casein kinase substrate in neurons 1          | 164  | 162  | 165  |
| 23970  | Pacsin2  | protein kinase C and casein kinase substrate in neurons 2          | 235  | 225  | 220  |
| 80708  | Pacsin3  | protein kinase C and casein kinase substrate in neurons 3          | 37   | 36   | 33   |
| 18599  | Padi1    | peptidyl arginine deiminase, type I                                | 125  | 120  | 128  |
| 18600  | Padi2    | peptidyl arginine deiminase, type II                               | 150  | 143  | 149  |
| 18601  | Padi3    | peptidyl arginine deiminase, type III                              | 92   | 82   | 96   |
| 18602  | Padi4    | peptidyl arginine deiminase, type IV                               | 83   | 86   | 84   |
| 242726 | Padi6    | peptidyl arginine deiminase, type VI                               | 101  | 92   | 92   |
| 54624  | Paf1     | Paf1, RNA polymerase II associated factor, homolog (S. cerevisiae) | 51   | 55   | 54   |
| 18472  | Pafah1b1 | platelet-activating factor acetylhydrolase, isoform 1b, subunit 1  | 161  | 168  | 168  |
| 18475  | Pafah1b2 | platelet-activating factor acetylhydrolase, isoform 1b, subunit 2  | 73   | 68   | 71   |
| 18476  | Pafah1b3 | platelet-activating factor acetylhydrolase, isoform 1b, subunit 3  | 22   | 23   | 24   |
| 100163 | Pafah2   | platelet-activating factor acetylhydrolase 2                       | 124  | 127  | 126  |
| 18478  | Pah      | phenylalanine hydroxylase                                          | 456  | 476  | 461  |
| 67054  | Paics    | phosphoribosylaminoimidazole carboxylase, phosphoribosylamino      | 56   | 62   | 58   |
| 218693 | Paip1    | polyadenylate binding protein-interacting protein 1                | 67   | 69   | 65   |
| 67869  | Paip2    | polyadenylate-binding protein-interacting protein 2                | 82   | 80   | 84   |
| 232164 | Paip2b   | poly(A) binding protein interacting protein 2B                     | 150  | 155  | 163  |
| 18479  | Pak1     | p21 protein (Cdc42/Rac)-activated kinase 1                         | 235  | 239  | 232  |
| 224105 | Pak2     | p21 protein (Cdc42/Rac)-activated kinase 2                         | 128  | 130  | 121  |
| 18481  | Pak3     | p21 protein (Cdc42/Rac)-activated kinase 3                         | 744  | 748  | 694  |
| 70584  | Pak4     | p21 protein (Cdc42/Rac)-activated kinase 4                         | 103  | 106  | 98   |
| 214230 | Pak6     | p21 protein (Cdc42/Rac)-activated kinase 6                         | 146  | 150  | 156  |
| 241656 | Pak7     | p21 protein (Cdc42/Rac)-activated kinase 7                         | 598  | 625  | 589  |
| 233826 | Palb2    | partner and localizer of BRCA2                                     | 42   | 39   | 41   |
| 18483  | Palm     | paralemmin                                                         | 34   | 38   | 34   |
| 18484  | Pam      | peptidylglycine alpha-amidating monooxygenase                      | 472  | 461  | 470  |
| 210622 | Pamr1    | peptidase domain containing associated with muscle regeneration    | 272  | 274  | 267  |
| 103135 | Pan2     | PAN2 polyA specific ribonuclease subunit homolog (S. cerevisiae)   | 33   | 32   | 31   |
| 72587  | Pan3     | PAN3 polyA specific ribonuclease subunit homolog (S. cerevisiae)   | 383  | 399  | 389  |
| 75735  | Pank1    | pantothenate kinase 1                                              | 136  | 132  | 135  |

|        |        |                                                                     |      |      |      |
|--------|--------|---------------------------------------------------------------------|------|------|------|
| 74450  | Pank2  | pantothenate kinase 2                                               | 70   | 74   | 70   |
| 211347 | Pank3  | pantothenate kinase 3                                               | 213  | 210  | 215  |
| 269614 | Pank4  | pantothenate kinase 4                                               | 57   | 52   | 56   |
| 212503 | Paox   | polyamine oxidase (exo-N4-amino)                                    | 25   | 28   | 26   |
| 100715 | Papd4  | PAP associated domain containing 4                                  | 195  | 195  | 200  |
| 214627 | Papd5  | PAP associated domain containing 5                                  | 173  | 171  | 173  |
| 210106 | Papd7  | PAP associated domain containing 7                                  | 797  | 774  | 777  |
| 18789  | Papola | poly (A) polymerase alpha                                           | 408  | 394  | 397  |
| 56522  | Papolb | poly (A) polymerase beta (testis specific)                          | 113  | 112  | 106  |
| 216578 | Papolg | poly(A) polymerase gamma                                            | 396  | 410  | 397  |
| 18491  | Pappa  | pregnancy-associated plasma protein A                               | 1977 | 1982 | 1978 |
| 23850  | Pappa2 | pappalysin 2                                                        | 943  | 934  | 943  |
| 23971  | Papss1 | 3'-phosphoadenosine 5'-phosphosulfate synthase 1                    | 887  | 918  | 910  |
| 23972  | Papss2 | 3'-phosphoadenosine 5'-phosphosulfate synthase 2                    | 332  | 335  | 328  |
| 26430  | Parg   | poly (ADP-ribose) glycohydrolase                                    | 151  | 159  | 148  |
| 50873  | Park2  | Parkinson disease (autosomal recessive, juvenile) 2, parkin         | 1655 | 1651 | 1646 |
| 57320  | Park7  | Parkinson disease (autosomal recessive, early onset) 7              | 78   | 79   | 80   |
| 381038 | Parl   | presenilin associated, rhomboid-like                                | 107  | 107  | 111  |
| 74108  | Parn   | poly(A)-specific ribonuclease (deadenylation nuclease)              | 204  | 201  | 197  |
| 11545  | Parp1  | poly (ADP-ribose) polymerase family, member 1                       | 196  | 204  | 205  |
| 547253 | Parp14 | poly (ADP-ribose) polymerase family, member 14                      | 222  | 219  | 234  |
| 11546  | Parp2  | poly (ADP-ribose) polymerase family, member 2                       | 78   | 85   | 85   |
| 328417 | Parp4  | poly (ADP-ribose) polymerase family, member 4                       | 129  | 125  | 125  |
| 230577 | Pars2  | prolyl-tRNA synthetase (mitochondrial)(putative)                    | 68   | 72   | 77   |
| 269224 | Pask   | PAS domain containing serine/threonine kinase                       | 45   | 49   | 51   |
| 225929 | Pat11  | protein associated with topoisomerase II homolog 1 (yeast)          | 83   | 88   | 91   |
| 56218  | Patz1  | POZ (BTB) and AT hook containing zinc finger 1                      | 74   | 76   | 84   |
| 114774 | Pawr   | PRKC, apoptosis, WT1, regulator                                     | 686  | 688  | 689  |
| 18503  | Pax1   | paired box gene 1                                                   | 1097 | 1108 | 1095 |
| 18504  | Pax2   | paired box gene 2                                                   | 456  | 443  | 447  |
| 18505  | Pax3   | paired box gene 3                                                   | 1026 | 1025 | 1008 |
| 18506  | Pax4   | paired box gene 4                                                   | 71   | 66   | 70   |
| 18507  | Pax5   | paired box gene 5                                                   | 582  | 597  | 598  |
| 18508  | Pax6   | paired box gene 6                                                   | 290  | 300  | 277  |
| 18509  | Pax7   | paired box gene 7                                                   | 388  | 385  | 387  |
| 18510  | Pax8   | paired box gene 8                                                   | 498  | 484  | 483  |
| 18511  | Pax9   | paired box gene 9                                                   | 700  | 676  | 697  |
| 55982  | Paxip1 | PAX interacting (with transcription-activation domain) protein 1    | 455  | 436  | 446  |
| 52033  | Pbk    | PDZ binding kinase                                                  | 219  | 220  | 212  |
| 68371  | Pbld1  | phenazine biosynthesis-like protein domain containing 1             | 102  | 95   | 104  |
| 67307  | Pbld2  | phenazine biosynthesis-like protein domain containing 2             | 47   | 51   | 51   |
| 66923  | Pbrm1  | polybromo 1                                                         | 146  | 137  | 139  |
| 18514  | Pbx1   | pre B-cell leukemia transcription factor 1                          | 2339 | 2350 | 2352 |
| 18515  | Pbx2   | pre B-cell leukemia transcription factor 2                          | 6    | 8    | 9    |
| 18516  | Pbx3   | pre B-cell leukemia transcription factor 3                          | 695  | 701  | 681  |
| 80720  | Pbx4   | pre-B-cell leukemia homeobox 4                                      | 90   | 86   | 90   |
| 229534 | Pbxip1 | pre-B-cell leukemia transcription factor interacting protein 1      | 37   | 36   | 35   |
| 13180  | Pcbd1  | pterin 4 alpha carbinolamine dehydratase/dimerization cofactor of I | 271  | 278  | 264  |
| 72562  | Pcbd2  | pterin 4 alpha carbinolamine dehydratase/dimerization cofactor of I | 85   | 83   | 97   |
| 23983  | Pcbp1  | poly(rC) binding protein 1                                          | 121  | 118  | 114  |
| 18521  | Pcbp2  | poly(rC) binding protein 2                                          | 72   | 78   | 69   |
| 110821 | Pcca   | propionyl-Coenzyme A carboxylase, alpha polypeptide                 | 561  | 558  | 555  |
| 66904  | Pccb   | propionyl Coenzyme A carboxylase, beta polypeptide                  | 567  | 559  | 566  |
| 53601  | Pcdh12 | protocadherin 12                                                    | 65   | 58   | 60   |
| 69837  | Pcgf1  | polycomb group ring finger 1                                        | 23   | 16   | 18   |

|        |         |                                                                   |      |      |      |
|--------|---------|-------------------------------------------------------------------|------|------|------|
| 22658  | Pcgf2   | polycomb group ring finger 2                                      | 17   | 20   | 20   |
| 69587  | Pcgf3   | polycomb group ring finger 3                                      | 132  | 129  | 136  |
| 76073  | Pcgf5   | polycomb group ring finger 5                                      | 535  | 562  | 540  |
| 71041  | Pcgf6   | polycomb group ring finger 6                                      | 67   | 62   | 66   |
| 234069 | Pcid2   | PCI domain containing 2                                           | 57   | 57   | 54   |
| 18534  | Pck1    | phosphoenolpyruvate carboxykinase 1, cytosolic                    | 128  | 123  | 136  |
| 74551  | Pck2    | phosphoenolpyruvate carboxykinase 2 (mitochondrial)               | 41   | 39   | 45   |
| 18537  | Pcmt1   | protein-L-isoaspartate (D-aspartate) O-methyltransferase 1        | 5    | 7    | 6    |
| 319263 | Pcmt1d1 | protein-L-isoaspartate (D-aspartate) O-methyltransferase domain c | 3296 | 3294 | 3268 |
| 245867 | Pcmt1d2 | protein-L-isoaspartate (D-aspartate) O-methyltransferase domain c | 89   | 89   | 84   |
| 18538  | Pcna    | proliferating cell nuclear antigen                                | 19   | 24   | 20   |
| 76302  | Pcnp    | PEST proteolytic signal containing nuclear protein                | 78   | 86   | 76   |
| 18542  | Pcolce  | procollagen C-endopeptidase enhancer protein                      | 29   | 25   | 30   |
| 18548  | Pcsk1   | proprotein convertase subtilisin/kexin type 1                     | 1083 | 1083 | 1060 |
| 30052  | Pcsk1n  | proprotein convertase subtilisin/kexin type 1 inhibitor           | 36   | 32   | 34   |
| 18549  | Pcsk2   | proprotein convertase subtilisin/kexin type 2                     | 993  | 1006 | 991  |
| 18551  | Pcsk4   | proprotein convertase subtilisin/kexin type 4                     | 14   | 11   | 10   |
| 18552  | Pcsk5   | proprotein convertase subtilisin/kexin type 5                     | 1602 | 1567 | 1593 |
| 18553  | Pcsk6   | proprotein convertase subtilisin/kexin type 6                     | 485  | 482  | 472  |
| 18554  | Pcsk7   | proprotein convertase subtilisin/kexin type 7                     | 90   | 87   | 87   |
| 100102 | Pcsk9   | proprotein convertase subtilisin/kexin type 9                     | 239  | 220  | 227  |
| 18559  | Pctp    | phosphatidylcholine transfer protein                              | 627  | 616  | 608  |
| 18563  | Pcx     | pyruvate carboxylase                                              | 256  | 268  | 264  |
| 66881  | Pcyox1  | prenylcysteine oxidase 1                                          | 46   | 42   | 44   |
| 240334 | Pcyox1l | prenylcysteine oxidase 1 like                                     | 50   | 50   | 49   |
| 13026  | Pcyt1a  | phosphate cytidyltransferase 1, choline, alpha isoform            | 90   | 90   | 86   |
| 236899 | Pcyt1b  | phosphate cytidyltransferase 1, choline, beta isoform             | 269  | 244  | 260  |
| 68671  | Pcyt2   | phosphate cytidyltransferase 2, ethanolamine                      | 20   | 20   | 18   |
| 18572  | Pdcd11  | programmed cell death 11                                          | 66   | 64   | 65   |
| 18569  | Pdcd4   | programmed cell death 4                                           | 357  | 353  | 356  |
| 67466  | Pdcl    | phosducin-like                                                    | 87   | 90   | 89   |
| 23984  | Pde10a  | phosphodiesterase 10A                                             | 703  | 708  | 712  |
| 241489 | Pde11a  | phosphodiesterase 11A                                             | 484  | 481  | 484  |
| 18573  | Pde1a   | phosphodiesterase 1A, calmodulin-dependent                        | 1006 | 1016 | 1008 |
| 18574  | Pde1b   | phosphodiesterase 1B, Ca2+-calmodulin dependent                   | 105  | 108  | 112  |
| 18575  | Pde1c   | phosphodiesterase 1C                                              | 902  | 883  | 869  |
| 207728 | Pde2a   | phosphodiesterase 2A, cGMP-stimulated                             | 139  | 134  | 144  |
| 54611  | Pde3a   | phosphodiesterase 3A, cGMP inhibited                              | 930  | 928  | 913  |
| 18576  | Pde3b   | phosphodiesterase 3B, cGMP-inhibited                              | 180  | 185  | 171  |
| 18577  | Pde4a   | phosphodiesterase 4A, cAMP specific                               | 154  | 146  | 146  |
| 18578  | Pde4b   | phosphodiesterase 4B, cAMP specific                               | 1423 | 1392 | 1405 |
| 110385 | Pde4c   | phosphodiesterase 4C, cAMP specific                               | 44   | 48   | 45   |
| 238871 | Pde4d   | phosphodiesterase 4D, cAMP specific                               | 1292 | 1285 | 1272 |
| 242202 | Pde5a   | phosphodiesterase 5A, cGMP-specific                               | 329  | 349  | 352  |
| 225600 | Pde6a   | phosphodiesterase 6A, cGMP-specific, rod, alpha                   | 245  | 231  | 250  |
| 18587  | Pde6b   | phosphodiesterase 6B, cGMP, rod receptor, beta polypeptide        | 156  | 156  | 156  |
| 18582  | Pde6d   | phosphodiesterase 6D, cGMP-specific, rod, delta                   | 82   | 88   | 81   |
| 18588  | Pde6g   | phosphodiesterase 6G, cGMP-specific, rod, gamma                   | 19   | 20   | 19   |
| 78600  | Pde6h   | phosphodiesterase 6H, cGMP-specific, cone, gamma                  | 289  | 302  | 291  |
| 18583  | Pde7a   | phosphodiesterase 7A                                              | 468  | 469  | 456  |
| 29863  | Pde7b   | phosphodiesterase 7B                                              | 777  | 758  | 767  |
| 18584  | Pde8a   | phosphodiesterase 8A                                              | 291  | 295  | 290  |
| 18585  | Pde9a   | phosphodiesterase 9A                                              | 280  | 283  | 266  |
| 68023  | Pdf     | peptide deformylase (mitochondrial)                               | 35   | 31   | 31   |
| 18590  | Pdgfa   | platelet derived growth factor, alpha                             | 369  | 374  | 360  |

|        |         |                                                                    |      |      |      |
|--------|---------|--------------------------------------------------------------------|------|------|------|
| 18591  | Pdgfb   | platelet derived growth factor, B polypeptide                      | 181  | 177  | 185  |
| 54635  | Pdgfc   | platelet-derived growth factor, C polypeptide                      | 1302 | 1289 | 1259 |
| 18595  | Pdgfra  | platelet derived growth factor receptor, alpha polypeptide         | 659  | 655  | 651  |
| 18596  | Pdgfrb  | platelet derived growth factor receptor, beta polypeptide          | 89   | 89   | 82   |
| 18597  | Pdha1   | pyruvate dehydrogenase E1 alpha 1                                  | 516  | 497  | 490  |
| 18598  | Pdha2   | pyruvate dehydrogenase E1 alpha 2                                  | 2836 | 2863 | 2801 |
| 68263  | Pdhb    | pyruvate dehydrogenase (lipoamide) beta                            | 148  | 155  | 153  |
| 27402  | Pd hx   | pyruvate dehydrogenase complex, component X                        | 230  | 221  | 231  |
| 69191  | Pdia2   | protein disulfide isomerase associated 2                           | 79   | 85   | 76   |
| 14827  | Pdia3   | protein disulfide isomerase associated 3                           | 41   | 40   | 39   |
| 12304  | Pdia4   | protein disulfide isomerase associated 4                           | 30   | 34   | 33   |
| 72599  | Pdia5   | protein disulfide isomerase associated 5                           | 226  | 224  | 228  |
| 71853  | Pdia6   | protein disulfide isomerase associated 6                           | 197  | 191  | 191  |
| 230809 | Pdik11  | PDLIM1 interacting kinase 1 like                                   | 74   | 79   | 77   |
| 228026 | Pdk1    | pyruvate dehydrogenase kinase, isoenzyme 1                         | 272  | 249  | 263  |
| 18604  | Pdk2    | pyruvate dehydrogenase kinase, isoenzyme 2                         | 89   | 86   | 87   |
| 236900 | Pdk3    | pyruvate dehydrogenase kinase, isoenzyme 3                         | 355  | 353  | 361  |
| 27273  | Pdk4    | pyruvate dehydrogenase kinase, isoenzyme 4                         | 429  | 432  | 426  |
| 381511 | Pdp1    | pyruvate dehydrogenase phosphatase catalytic subunit 1             | 423  | 429  | 412  |
| 382051 | Pdp2    | pyruvate dehydrogenase phosphatase catalytic subunit 2             | 110  | 106  | 108  |
| 18607  | Pd pk1  | 3-phosphoinositide dependent protein kinase 1                      | 120  | 119  | 113  |
| 14726  | Pd pn   | podoplanin                                                         | 171  | 180  | 181  |
| 319518 | Pd pr   | pyruvate dehydrogenase phosphatase regulatory subunit              | 224  | 230  | 235  |
| 68559  | Pd rg1  | p53 and DNA damage regulated 1                                     | 87   | 86   | 90   |
| 71521  | Pds5a   | PDS5, regulator of cohesion maintenance, homolog A (S. cerevisiae) | 304  | 310  | 286  |
| 56075  | Pdss1   | prenyl (solaneyl) diphosphate synthase, subunit 1                  | 338  | 348  | 331  |
| 71365  | Pdss2   | prenyl (solaneyl) diphosphate synthase, subunit 2                  | 377  | 397  | 388  |
| 18609  | Pdx1    | pancreatic and duodenal homeobox 1                                 | 157  | 147  | 157  |
| 94184  | Pdx dc1 | pyridoxal-dependent decarboxylase domain containing 1              | 154  | 153  | 152  |
| 216134 | Pd xk   | pyridoxal (pyridoxine, vitamin B6) kinase                          | 197  | 196  | 188  |
| 57028  | Pd xp   | pyridoxal (pyridoxine, vitamin B6) phosphatase                     | 32   | 30   | 28   |
| 55983  | Pd zrn3 | PDZ domain containing RING finger 3                                | 1211 | 1215 | 1205 |
| 23980  | Pebp1   | phosphatidylethanolamine binding protein 1                         | 240  | 227  | 242  |
| 18613  | Pecam1  | platelet/endothelial cell adhesion molecule 1                      | 176  | 177  | 175  |
| 111175 | Pecr    | peroxisomal trans-2-enoyl-CoA reductase                            | 98   | 91   | 97   |
| 67245  | Peli1   | pellino 1                                                          | 524  | 521  | 523  |
| 93834  | Peli2   | pellino 2                                                          | 677  | 681  | 694  |
| 240518 | Peli3   | pellino 3                                                          | 42   | 40   | 46   |
| 105083 | Pelo    | pelota homolog (Drosophila)                                        | 211  | 213  | 217  |
| 75273  | Pelp1   | proline, glutamic acid and leucine rich protein 1                  | 105  | 109  | 103  |
| 18618  | Pemt    | phosphatidylethanolamine N-methyltransferase                       | 179  | 180  | 186  |
| 226153 | Peo1    | progressive external ophthalmoplegia 1 (human)                     | 8    | 10   | 13   |
| 18624  | Pepd    | peptidase D                                                        | 311  | 313  | 301  |
| 18626  | Per1    | period homolog 1 (Drosophila)                                      | 35   | 40   | 35   |
| 18627  | Per2    | period homolog 2 (Drosophila)                                      | 106  | 107  | 106  |
| 18628  | Per3    | period homolog 3 (Drosophila)                                      | 84   | 82   | 77   |
| 64934  | Pes1    | pescadillo homolog 1, containing BRCT domain (zebrafish)           | 64   | 71   | 64   |
| 229487 | Pet112l | PET112-like (yeast)                                                | 994  | 1016 | 1000 |
| 56273  | Pex14   | peroxisomal biogenesis factor 14                                   | 384  | 393  | 373  |
| 19305  | Pex5    | peroxisomal biogenesis factor 5                                    | 136  | 139  | 139  |
| 224824 | Pex6    | peroxisomal biogenesis factor 6                                    | 30   | 29   | 32   |
| 18634  | Pex7    | peroxisomal biogenesis factor 7                                    | 105  | 106  | 105  |
| 56744  | Pf4     | platelet factor 4                                                  | 22   | 22   | 21   |
| 237823 | Pfas    | phosphoribosylformylglycinamide synthase (FGAR amidotransferase)   | 34   | 33   | 33   |
| 18637  | Pfdn2   | prefoldin 2                                                        | 21   | 19   | 17   |

|        |         |                                                                |      |      |      |
|--------|---------|----------------------------------------------------------------|------|------|------|
| 56612  | Pfdn5   | prefoldin 5                                                    | 46   | 44   | 48   |
| 18639  | Pfkfb1  | 6-phosphofructo-2-kinase/fructose-2,6-biphosphatase 1          | 89   | 83   | 80   |
| 18640  | Pfkfb2  | 6-phosphofructo-2-kinase/fructose-2,6-biphosphatase 2          | 70   | 64   | 71   |
| 170768 | Pfkfb3  | 6-phosphofructo-2-kinase/fructose-2,6-biphosphatase 3          | 624  | 633  | 619  |
| 270198 | Pfkfb4  | 6-phosphofructo-2-kinase/fructose-2,6-biphosphatase 4          | 70   | 68   | 73   |
| 18641  | Pfkl    | phosphofructokinase, liver, B-type                             | 85   | 85   | 81   |
| 18642  | Pfkm    | phosphofructokinase, muscle                                    | 182  | 191  | 181  |
| 56421  | Pfkp    | phosphofructokinase, platelet                                  | 2090 | 2133 | 2089 |
| 18643  | Pfn1    | profilin 1                                                     | 9    | 10   | 8    |
| 58803  | Pga5    | pepsinogen 5, group I                                          | 75   | 74   | 69   |
| 18648  | Pgam1   | phosphoglycerate mutase 1                                      | 49   | 46   | 42   |
| 56012  | Pgam2   | phosphoglycerate mutase 2                                      | 67   | 62   | 63   |
| 241062 | Pgap1   | post-GPI attachment to proteins 1                              | 621  | 625  | 625  |
| 233575 | Pgap2   | post-GPI attachment to proteins 2                              | 52   | 53   | 50   |
| 320655 | Pgap3   | post-GPI attachment to proteins 3                              | 31   | 33   | 32   |
| 109820 | Pgc     | progastricsin (pepsinogen C)                                   | 58   | 54   | 53   |
| 54381  | Pgcp    | plasma glutamate carboxypeptidase                              | 616  | 626  | 609  |
| 110208 | Pgd     | phosphogluconate dehydrogenase                                 | 231  | 223  | 225  |
| 225467 | Pggt1b  | protein geranylgeranyltransferase type I, beta subunit         | 133  | 127  | 127  |
| 18655  | Pgk1    | phosphoglycerate kinase 1                                      | 96   | 101  | 99   |
| 18663  | Pgk2    | phosphoglycerate kinase 2                                      | 500  | 515  | 499  |
| 66171  | Pgls    | 6-phosphogluconolactonase                                      | 37   | 33   | 36   |
| 21946  | Pglyrp1 | peptidoglycan recognition protein 1                            | 101  | 92   | 91   |
| 57757  | Pglyrp2 | peptidoglycan recognition protein 2                            | 62   | 59   | 58   |
| 242100 | Pglyrp3 | peptidoglycan recognition protein 3                            | 1265 | 1290 | 1283 |
| 384997 | Pglyrp4 | peptidoglycan recognition protein 4                            | 482  | 484  | 487  |
| 66681  | Pgm1    | phosphoglucomutase 1                                           | 233  | 241  | 242  |
| 72157  | Pgm2    | phosphoglucomutase 2                                           | 350  | 356  | 348  |
| 70974  | Pgm2l1  | phosphoglucomutase 2-like 1                                    | 104  | 102  | 104  |
| 109785 | Pgm3    | phosphoglucomutase 3                                           | 133  | 130  | 134  |
| 226041 | Pgm5    | phosphoglucomutase 5                                           | 280  | 295  | 290  |
| 67078  | Pgp     | phosphoglycolate phosphatase                                   | 20   | 20   | 16   |
| 66522  | Pgpep1  | pyroglutamyl-peptidase I                                       | 53   | 52   | 55   |
| 78444  | Pgpep1l | pyroglutamyl-peptidase I-like                                  | 419  | 420  | 418  |
| 18667  | Pgr     | progesterone receptor                                          | 884  | 873  | 872  |
| 74451  | Pgs1    | phosphatidylglycerophosphate synthase 1                        | 199  | 202  | 215  |
| 18673  | Phb     | prohibitin                                                     | 180  | 166  | 187  |
| 12034  | Phb2    | prohibitin 2                                                   | 6    | 5    | 7    |
| 18675  | Phex    | phosphate regulating gene with homologies to endopeptidases on | 1149 | 1161 | 1106 |
| 21652  | Phf1    | PHD finger protein 1                                           | 30   | 25   | 31   |
| 72057  | Phf10   | PHD finger protein 10                                          | 39   | 37   | 36   |
| 268448 | Phf12   | PHD finger protein 12                                          | 128  | 129  | 132  |
| 230936 | Phf13   | PHD finger protein 13                                          | 21   | 20   | 21   |
| 76901  | Phf15   | PHD finger protein 15                                          | 266  | 256  | 253  |
| 382207 | Phf16   | PHD finger protein 16                                          | 216  | 210  | 209  |
| 269424 | Phf17   | PHD finger protein 17                                          | 867  | 877  | 859  |
| 74016  | Phf19   | PHD finger protein 19                                          | 108  | 110  | 108  |
| 18676  | Phf2    | PHD finger protein 2                                           | 380  | 383  | 376  |
| 228829 | Phf20   | PHD finger protein 20                                          | 175  | 177  | 172  |
| 192285 | Phf21a  | PHD finger protein 21A                                         | 448  | 446  | 460  |
| 68479  | Phf5a   | PHD finger protein 5A                                          | 21   | 23   | 21   |
| 70998  | Phf6    | PHD finger protein 6                                           | 244  | 238  | 232  |
| 320595 | Phf8    | PHD finger protein 8                                           | 559  | 563  | 555  |
| 236539 | Phgdh   | 3-phosphoglycerate dehydrogenase                               | 137  | 135  | 131  |
| 83946  | Phip    | pleckstrin homology domain interacting protein                 | 412  | 397  | 389  |

|        |          |                                                                        |      |      |      |
|--------|----------|------------------------------------------------------------------------|------|------|------|
| 18679  | Phka1    | phosphorylase kinase alpha 1                                           | 240  | 241  | 244  |
| 110094 | Phka2    | phosphorylase kinase alpha 2                                           | 408  | 396  | 403  |
| 102093 | Phkb     | phosphorylase kinase beta                                              | 902  | 916  | 911  |
| 18682  | Phkg1    | phosphorylase kinase gamma 1                                           | 55   | 57   | 54   |
| 68961  | Phkg2    | phosphorylase kinase, gamma 2 (testis)                                 | 74   | 76   | 75   |
| 21664  | Phlda1   | pleckstrin homology-like domain, family A, member 1                    | 620  | 596  | 594  |
| 98432  | Phlpp1   | PH domain and leucine rich repeat protein phosphatase 1                | 916  | 919  | 922  |
| 244650 | Phlpp2   | PH domain and leucine rich repeat protein phosphatase 2                | 151  | 159  | 155  |
| 237928 | Phospho1 | phosphatase, orphan 1                                                  | 121  | 114  | 115  |
| 73373  | Phospho2 | phosphatase, orphan 2                                                  | 42   | 48   | 41   |
| 11859  | Phox2a   | paired-like homeobox 2a                                                | 216  | 220  | 228  |
| 18935  | Phox2b   | paired-like homeobox 2b                                                | 659  | 670  | 648  |
| 75454  | Phpt1    | phosphohistidine phosphatase 1                                         | 10   | 8    | 9    |
| 101471 | Phrf1    | PHD and ring finger domains 1                                          | 61   | 62   | 57   |
| 18685  | Phtf1    | putative homeodomain transcription factor 1                            | 69   | 69   | 63   |
| 68770  | Phtf2    | putative homeodomain transcription factor 2                            | 1237 | 1249 | 1255 |
| 16922  | Phyh     | phytanoyl-CoA hydroxylase                                              | 124  | 121  | 127  |
| 227696 | Phyh1    | phytanoyl-CoA dioxygenase domain containing 1                          | 62   | 62   | 59   |
| 84095  | Pi4k2a   | phosphatidylinositol 4-kinase type 2 alpha                             | 58   | 54   | 52   |
| 67073  | Pi4k2b   | phosphatidylinositol 4-kinase type 2 beta                              | 140  | 143  | 145  |
| 224020 | Pi4ka    | phosphatidylinositol 4-kinase, catalytic, alpha polypeptide            | 56   | 62   | 62   |
| 107650 | Pi4kb    | phosphatidylinositol 4-kinase, catalytic, beta polypeptide             | 78   | 81   | 79   |
| 56469  | Pias1    | protein inhibitor of activated STAT 1                                  | 375  | 380  | 366  |
| 17344  | Pias2    | protein inhibitor of activated STAT 2                                  | 175  | 170  | 171  |
| 229615 | Pias3    | protein inhibitor of activated STAT 3                                  | 47   | 51   | 45   |
| 59004  | Pias4    | protein inhibitor of activated STAT 4                                  | 48   | 48   | 46   |
| 233489 | Picalm   | phosphatidylinositol binding clathrin assembly protein                 | 319  | 317  | 298  |
| 18693  | Pick1    | protein interacting with C kinase 1                                    | 110  | 112  | 112  |
| 18700  | Piga     | phosphatidylinositol glycan anchor biosynthesis, class A               | 82   | 80   | 72   |
| 55981  | Pigb     | phosphatidylinositol glycan anchor biosynthesis, class B               | 82   | 81   | 75   |
| 67292  | Pigc     | phosphatidylinositol glycan anchor biosynthesis, class C               | 15   | 14   | 12   |
| 18701  | Pigf     | phosphatidylinositol glycan anchor biosynthesis, class F               | 80   | 78   | 78   |
| 433931 | Pigg     | phosphatidylinositol glycan anchor biosynthesis, class G               | 152  | 153  | 151  |
| 329777 | Pigk     | phosphatidylinositol glycan anchor biosynthesis, class K               | 402  | 401  | 407  |
| 327942 | Pigl     | phosphatidylinositol glycan anchor biosynthesis, class L               | 114  | 110  | 109  |
| 67556  | Pigm     | phosphatidylinositol glycan anchor biosynthesis, class M               | 163  | 178  | 169  |
| 27392  | Pign     | phosphatidylinositol glycan anchor biosynthesis, class N               | 393  | 408  | 383  |
| 56703  | Pigo     | phosphatidylinositol glycan anchor biosynthesis, class O               | 25   | 22   | 28   |
| 56176  | Pigp     | phosphatidylinositol glycan anchor biosynthesis, class P               | 250  | 243  | 249  |
| 14755  | Pigq     | phosphatidylinositol glycan anchor biosynthesis, class Q               | 30   | 30   | 28   |
| 276846 | Pigs     | phosphatidylinositol glycan anchor biosynthesis, class S               | 28   | 26   | 26   |
| 78928  | Pigt     | phosphatidylinositol glycan anchor biosynthesis, class T               | 90   | 93   | 91   |
| 228812 | Pigu     | phosphatidylinositol glycan anchor biosynthesis, class U               | 35   | 31   | 34   |
| 230801 | Pigv     | phosphatidylinositol glycan anchor biosynthesis, class V               | 160  | 149  | 155  |
| 70325  | Pigw     | phosphatidylinositol glycan anchor biosynthesis, class W               | 59   | 59   | 66   |
| 72084  | Pigx     | phosphatidylinositol glycan anchor biosynthesis, class X               | 31   | 24   | 25   |
| 66459  | Pigy     | phosphatidylinositol glycan anchor biosynthesis, class Y               | 157  | 149  | 147  |
| 66268  | Pigyl    | phosphatidylinositol glycan anchor biosynthesis, class Y-like          | 71   | 67   | 63   |
| 239827 | Pigz     | phosphatidylinositol glycan anchor biosynthesis, class Z               | 86   | 93   | 81   |
| 18704  | Pik3c2a  | phosphatidylinositol 3-kinase, C2 domain containing, alpha polypeptide | 230  | 227  | 236  |
| 240752 | Pik3c2b  | phosphoinositide-3-kinase, class 2, beta polypeptide                   | 135  | 131  | 135  |
| 18705  | Pik3c2g  | phosphatidylinositol 3-kinase, C2 domain containing, gamma polypeptide | 881  | 896  | 865  |
| 225326 | Pik3c3   | phosphoinositide-3-kinase, class 3                                     | 7028 | 7097 | 7012 |
| 18706  | Pik3ca   | phosphatidylinositol 3-kinase, catalytic, alpha polypeptide            | 166  | 158  | 162  |
| 74769  | Pik3cb   | phosphatidylinositol 3-kinase, catalytic, beta polypeptide             | 266  | 281  | 269  |

|        |          |                                                                       |      |      |      |
|--------|----------|-----------------------------------------------------------------------|------|------|------|
| 18707  | Pik3cd   | phosphatidylinositol 3-kinase catalytic delta polypeptide             | 249  | 243  | 237  |
| 30955  | Pik3cg   | phosphoinositide-3-kinase, catalytic, gamma polypeptide               | 401  | 413  | 401  |
| 18708  | Pik3r1   | phosphatidylinositol 3-kinase, regulatory subunit, polypeptide 1 (p8  | 2507 | 2487 | 2468 |
| 18710  | Pik3r3   | phosphatidylinositol 3 kinase, regulatory subunit, polypeptide 3 (p5  | 375  | 393  | 372  |
| 75669  | Pik3r4   | phosphatidylinositol 3 kinase, regulatory subunit, polypeptide 4, p1  | 410  | 380  | 397  |
| 320207 | Pik3r5   | phosphoinositide-3-kinase, regulatory subunit 5, p101                 | 151  | 150  | 150  |
| 18711  | Pikfyve  | phosphoinositide kinase, FYVE finger containing                       | 157  | 157  | 161  |
| 18712  | Pim1     | proviral integration site 1                                           | 244  | 227  | 238  |
| 18715  | Pim2     | proviral integration site 2                                           | 54   | 48   | 48   |
| 223775 | Pim3     | proviral integration site 3                                           | 162  | 171  | 172  |
| 23988  | Pin1     | protein (peptidyl-prolyl cis/trans isomerase) NIMA-interacting 1      | 103  | 101  | 105  |
| 69713  | Pin4     | protein (peptidyl-prolyl cis/trans isomerase) NIMA-interacting, 4 (pæ | 111  | 110  | 107  |
| 68943  | Pink1    | PTEN induced putative kinase 1                                        | 79   | 80   | 77   |
| 72400  | Pinx1    | PIN2/TERF1 interacting, telomerase inhibitor 1                        | 266  | 292  | 277  |
| 212167 | Pion     | pigeon homolog (Drosophila)                                           | 388  | 416  | 411  |
| 18718  | Pip4k2a  | phosphatidylinositol-5-phosphate 4-kinase, type II, alpha             | 377  | 395  | 381  |
| 108083 | Pip4k2b  | phosphatidylinositol-5-phosphate 4-kinase, type II, beta              | 82   | 76   | 73   |
| 117150 | Pip4k2c  | phosphatidylinositol-5-phosphate 4-kinase, type II, gamma             | 92   | 86   | 86   |
| 18720  | Pip5k1a  | phosphatidylinositol-4-phosphate 5-kinase, type 1 alpha               | 93   | 91   | 96   |
| 18719  | Pip5k1b  | phosphatidylinositol-4-phosphate 5-kinase, type 1 beta                | 249  | 253  | 245  |
| 18717  | Pip5k1c  | phosphatidylinositol-4-phosphate 5-kinase, type 1 gamma               | 34   | 33   | 36   |
| 227733 | Pip5k1l  | phosphatidylinositol-4-phosphate 5-kinase-like 1                      | 22   | 22   | 17   |
| 19193  | Pipox    | pipecolic acid oxidase                                                | 198  | 183  | 197  |
| 69656  | Pir      | pirin                                                                 | 140  | 137  | 137  |
| 320951 | Pisd     | phosphatidylserine decarboxylase                                      | 257  | 261  | 258  |
| 71795  | Pitpnc1  | phosphatidylinositol transfer protein, cytoplasmic 1                  | 387  | 376  | 375  |
| 69617  | Pitrm1   | pitrilysin metalloproteinase 1                                        | 981  | 999  | 1003 |
| 18740  | Pitx1    | paired-like homeodomain transcription factor 1                        | 445  | 445  | 435  |
| 18741  | Pitx2    | paired-like homeodomain transcription factor 2                        | 1812 | 1832 | 1813 |
| 18742  | Pitx3    | paired-like homeodomain transcription factor 3                        | 25   | 26   | 23   |
| 57749  | Piwil1   | piwi-like homolog 1 (Drosophila)                                      | 468  | 451  | 461  |
| 57746  | Piwil2   | piwi-like homolog 2 (Drosophila)                                      | 124  | 118  | 121  |
| 330890 | Piwil4   | piwi-like homolog 4 (Drosophila)                                      | 179  | 181  | 193  |
| 18744  | Pja1     | praja1, RING-H2 motif containing                                      | 467  | 472  | 461  |
| 224938 | Pja2     | praja 2, RING-H2 motif containing                                     | 838  | 838  | 841  |
| 18763  | Pkd1     | polycystic kidney disease 1 homolog                                   | 128  | 127  | 125  |
| 18764  | Pkd2     | polycystic kidney disease 2                                           | 95   | 99   | 92   |
| 106522 | Pkdcc    | protein kinase domain containing, cytoplasmic                         | 2031 | 2068 | 2048 |
| 18767  | Pkia     | protein kinase inhibitor, alpha                                       | 1128 | 1112 | 1102 |
| 18768  | Pkib     | protein kinase inhibitor beta, cAMP dependent, testis specific        | 350  | 343  | 354  |
| 18769  | Pkig     | protein kinase inhibitor, gamma                                       | 192  | 179  | 182  |
| 18770  | Pklr     | pyruvate kinase liver and red blood cell                              | 59   | 53   | 52   |
| 18746  | Pkm2     | pyruvate kinase, muscle                                               | 112  | 122  | 119  |
| 268930 | Pkmyt1   | protein kinase, membrane associated tyrosine/threonine 1              | 75   | 73   | 72   |
| 320795 | Pkn1     | protein kinase N1                                                     | 71   | 69   | 67   |
| 109333 | Pkn2     | protein kinase N2                                                     | 1830 | 1852 | 1834 |
| 263803 | Pkn3     | protein kinase N3                                                     | 32   | 31   | 35   |
| 18771  | Pknx1    | Pbx/knotted 1 homeobox                                                | 152  | 154  | 150  |
| 85031  | Pla1a    | phospholipase A1 member A                                             | 117  | 124  | 115  |
| 26565  | Pla2g10  | phospholipase A2, group X                                             | 145  | 138  | 142  |
| 66350  | Pla2g12a | phospholipase A2, group XIIA                                          | 89   | 86   | 86   |
| 69836  | Pla2g12b | phospholipase A2, group XIIIB                                         | 150  | 153  | 155  |
| 192654 | Pla2g15  | phospholipase A2, group XV                                            | 40   | 43   | 41   |
| 225845 | Pla2g16  | phospholipase A2, group XVI                                           | 141  | 141  | 153  |
| 18778  | Pla2g1b  | phospholipase A2, group IB, pancreas                                  | 67   | 74   | 67   |

|        |         |                                                                             |      |      |      |
|--------|---------|-----------------------------------------------------------------------------|------|------|------|
| 18780  | Pla2g2a | phospholipase A2, group IIA (platelets, synovial fluid)                     | 59   | 63   | 57   |
| 18781  | Pla2g2c | phospholipase A2, group IIC                                                 | 43   | 38   | 46   |
| 18782  | Pla2g2d | phospholipase A2, group IID                                                 | 79   | 76   | 79   |
| 26970  | Pla2g2e | phospholipase A2, group IIE                                                 | 67   | 68   | 67   |
| 26971  | Pla2g2f | phospholipase A2, group IIF                                                 | 69   | 65   | 63   |
| 18783  | Pla2g4a | phospholipase A2, group IVA (cytosolic, calcium-dependent)                  | 4467 | 4532 | 4450 |
| 211429 | Pla2g4b | phospholipase A2, group IVB (cytosolic)                                     | 160  | 154  | 158  |
| 232889 | Pla2g4c | phospholipase A2, group IVC (cytosolic, calcium-independent)                | 163  | 154  | 155  |
| 78390  | Pla2g4d | phospholipase A2, group IVD                                                 | 93   | 94   | 90   |
| 329502 | Pla2g4e | phospholipase A2, group IVE                                                 | 175  | 178  | 175  |
| 271844 | Pla2g4f | phospholipase A2, group IVF                                                 | 83   | 80   | 85   |
| 18784  | Pla2g5  | phospholipase A2, group V                                                   | 132  | 130  | 130  |
| 53357  | Pla2g6  | phospholipase A2, group VI                                                  | 82   | 79   | 82   |
| 27226  | Pla2g7  | phospholipase A2, group VII (platelet-activating factor acetylhydrolase)    | 170  | 160  | 169  |
| 18779  | Pla2r1  | phospholipase A2 receptor 1                                                 | 379  | 375  | 356  |
| 56711  | Plag1   | pleiomorphic adenoma gene 1                                                 | 79   | 82   | 82   |
| 22634  | Plagl1  | pleiomorphic adenoma gene-like 1                                            | 211  | 208  | 217  |
| 54711  | Plagl2  | pleiomorphic adenoma gene-like 2                                            | 19   | 17   | 23   |
| 18791  | Plat    | plasminogen activator, tissue                                               | 127  | 124  | 124  |
| 18792  | Plau    | plasminogen activator, urokinase                                            | 172  | 180  | 177  |
| 18793  | Plaur   | plasminogen activator, urokinase receptor                                   | 43   | 47   | 45   |
| 665270 | Plb1    | phospholipase B1                                                            | 581  | 562  | 577  |
| 66857  | Plbd1   | phospholipase B domain containing 1                                         | 343  | 347  | 343  |
| 71772  | Plbd2   | phospholipase B domain containing 2                                         | 38   | 40   | 38   |
| 18795  | Plcb1   | phospholipase C, beta 1                                                     | 1205 | 1195 | 1186 |
| 18796  | Plcb2   | phospholipase C, beta 2                                                     | 54   | 52   | 52   |
| 18797  | Plcb3   | phospholipase C, beta 3                                                     | 41   | 41   | 42   |
| 18799  | Plcd1   | phospholipase C, delta 1                                                    | 65   | 53   | 57   |
| 72469  | Plcd3   | phospholipase C, delta 3                                                    | 86   | 84   | 92   |
| 18802  | Plcd4   | phospholipase C, delta 4                                                    | 102  | 106  | 109  |
| 74055  | Plce1   | phospholipase C, epsilon 1                                                  | 540  | 545  | 530  |
| 18803  | Plcg1   | phospholipase C, gamma 1                                                    | 295  | 280  | 279  |
| 234779 | Plcg2   | phospholipase C, gamma 2                                                    | 414  | 414  | 422  |
| 269437 | Plch1   | phospholipase C, eta 1                                                      | 801  | 831  | 799  |
| 269615 | Plch2   | phospholipase C, eta 2                                                      | 126  | 133  | 138  |
| 227120 | Plcl1   | phospholipase C-like 1                                                      | 1631 | 1611 | 1579 |
| 224860 | Plcl2   | phospholipase C-like 2                                                      | 1113 | 1113 | 1118 |
| 403178 | Plcxd1  | phosphatidylinositol-specific phospholipase C, X domain containing 1        | 148  | 140  | 140  |
| 239318 | Plcxd3  | phosphatidylinositol-specific phospholipase C, X domain containing 3        | 876  | 902  | 868  |
| 114875 | Plcz1   | phospholipase C, zeta 1                                                     | 245  | 258  | 257  |
| 18805  | Pld1    | phospholipase D1                                                            | 542  | 540  | 531  |
| 18806  | Pld2    | phospholipase D2                                                            | 51   | 46   | 41   |
| 18807  | Pld3    | phospholipase D family, member 3                                            | 40   | 41   | 38   |
| 104759 | Pld4    | phospholipase D family, member 4                                            | 82   | 87   | 80   |
| 319455 | Pld5    | phospholipase D family, member 5                                            | 1084 | 1078 | 1071 |
| 194908 | Pld6    | phospholipase D family, member 6                                            | 191  | 181  | 188  |
| 56193  | Plek    | pleckstrin                                                                  | 135  | 131  | 134  |
| 101476 | Plekha1 | pleckstrin homology domain containing, family A (phosphoinositide 3-kinase) | 212  | 217  | 209  |
| 18815  | Plg     | plasminogen                                                                 | 257  | 250  | 242  |
| 103968 | Plin1   | perilipin 1                                                                 | 38   | 37   | 37   |
| 18817  | Plk1    | polo-like kinase 1 (Drosophila)                                             | 70   | 68   | 66   |
| 20620  | Plk2    | polo-like kinase 2 (Drosophila)                                             | 1147 | 1177 | 1137 |
| 12795  | Plk3    | polo-like kinase 3 (Drosophila)                                             | 35   | 30   | 31   |
| 20873  | Plk4    | polo-like kinase 4 (Drosophila)                                             | 127  | 129  | 125  |
| 216166 | Plk5    | polo-like kinase 5 (Drosophila)                                             | 48   | 47   | 46   |

|        |          |                                                             |     |     |     |
|--------|----------|-------------------------------------------------------------|-----|-----|-----|
| 18822  | Plod1    | procollagen-lysine, 2-oxoglutarate 5-dioxygenase 1          | 44  | 44  | 45  |
| 26432  | Plod2    | procollagen lysine, 2-oxoglutarate 5-dioxygenase 2          | 111 | 116 | 108 |
| 26433  | Plod3    | procollagen-lysine, 2-oxoglutarate 5-dioxygenase 3          | 27  | 22  | 25  |
| 18823  | Plp1     | proteolipid protein (myelin) 1                              | 110 | 108 | 110 |
| 53317  | Plrg1    | pleiotropic regulator 1, PRL1 homolog (Arabidopsis)         | 675 | 668 | 662 |
| 22038  | Plscr1   | phospholipid scramblase 1                                   | 100 | 106 | 103 |
| 18830  | Pltp     | phospholipid transfer protein                               | 62  | 58  | 62  |
| 212933 | Pm20d1   | peptidase M20 domain containing 1                           | 110 | 113 | 107 |
| 242377 | Pm20d2   | peptidase M20 domain containing 2                           | 95  | 90  | 95  |
| 58801  | Pmaip1   | phorbol-12-myristate-13-acetate-induced protein 1           | 740 | 744 | 749 |
| 20431  | Pmel     | premelanosome protein                                       | 54  | 54  | 48  |
| 67037  | Pmf1     | polyamine-modulated factor 1                                | 51  | 51  | 46  |
| 18854  | Pml      | promyelocytic leukemia                                      | 63  | 62  | 61  |
| 29858  | Pmm1     | phosphomannomutase 1                                        | 59  | 56  | 54  |
| 54128  | Pmm2     | phosphomannomutase 2                                        | 46  | 45  | 45  |
| 66865  | Pmpca    | peptidase (mitochondrial processing) alpha                  | 28  | 22  | 26  |
| 73078  | Pmpcb    | peptidase (mitochondrial processing) beta                   | 108 | 106 | 108 |
| 227099 | Pms1     | postmeiotic segregation increased 1 (S. cerevisiae)         | 140 | 140 | 136 |
| 18861  | Pms2     | postmeiotic segregation increased 2 (S. cerevisiae)         | 141 | 130 | 148 |
| 68603  | Pmvk     | phosphomevalonate kinase                                    | 107 | 110 | 114 |
| 93843  | Pnck     | pregnancy upregulated non-ubiquitously expressed CaM kinase | 42  | 43  | 40  |
| 59047  | Pnkp     | polynucleotide kinase 3'- phosphatase                       | 20  | 22  | 22  |
| 69060  | Pnlip    | pancreatic lipase                                           | 277 | 266 | 281 |
| 18946  | Pnliprp1 | pancreatic lipase related protein 1                         | 124 | 114 | 117 |
| 18947  | Pnliprp2 | pancreatic lipase-related protein 2                         | 88  | 82  | 84  |
| 18948  | Pnmt     | phenylethanolamine-N-methyltransferase                      | 17  | 19  | 19  |
| 18949  | Pnn      | pinin                                                       | 47  | 45  | 43  |
| 18950  | Pnp      | purine-nucleoside phosphorylase                             | 35  | 30  | 34  |
| 433091 | Pnpla1   | patatin-like phospholipase domain containing 1              | 154 | 137 | 152 |
| 66853  | Pnpla2   | patatin-like phospholipase domain containing 2              | 15  | 12  | 19  |
| 116939 | Pnpla3   | patatin-like phospholipase domain containing 3              | 87  | 93  | 93  |
| 75772  | Pnpla5   | patatin-like phospholipase domain containing 5              | 85  | 82  | 82  |
| 50767  | Pnpla6   | patatin-like phospholipase domain containing 6              | 86  | 86  | 89  |
| 241274 | Pnpla7   | patatin-like phospholipase domain containing 7              | 106 | 101 | 111 |
| 67452  | Pnpla8   | patatin-like phospholipase domain containing 8              | 145 | 155 | 155 |
| 103711 | Pnpo     | pyridoxine 5'-phosphate oxidase                             | 22  | 20  | 21  |
| 71701  | Pnpt1    | polyribonucleotide nucleotidyltransferase 1                 | 412 | 424 | 409 |
| 52830  | Pnrc2    | proline-rich nuclear receptor coactivator 2                 | 48  | 54  | 48  |
| 140484 | Pofut1   | protein O-fucosyltransferase 1                              | 64  | 62  | 67  |
| 80294  | Pofut2   | protein O-fucosyltransferase 2                              | 215 | 200 | 207 |
| 224143 | Poglut1  | protein O-glucosyltransferase 1                             | 48  | 49  | 50  |
| 18968  | Pola1    | polymerase (DNA directed), alpha 1                          | 429 | 426 | 401 |
| 18969  | Pola2    | polymerase (DNA directed), alpha 2                          | 83  | 79  | 83  |
| 18970  | Polb     | polymerase (DNA directed), beta                             | 90  | 88  | 90  |
| 18971  | Pold1    | polymerase (DNA directed), delta 1, catalytic subunit       | 29  | 22  | 27  |
| 18972  | Pold2    | polymerase (DNA directed), delta 2, regulatory subunit      | 52  | 48  | 44  |
| 67967  | Pold3    | polymerase (DNA-directed), delta 3, accessory subunit       | 203 | 201 | 192 |
| 69745  | Pold4    | polymerase (DNA-directed), delta 4                          | 72  | 71  | 73  |
| 73826  | Poldip3  | polymerase (DNA-directed), delta interacting protein 3      | 32  | 35  | 32  |
| 18973  | Pole     | polymerase (DNA directed), epsilon                          | 71  | 79  | 78  |
| 18974  | Pole2    | polymerase (DNA directed), epsilon 2 (p59 subunit)          | 58  | 55  | 57  |
| 59001  | Pole3    | polymerase (DNA directed), epsilon 3 (p17 subunit)          | 6   | 6   | 6   |
| 66979  | Pole4    | polymerase (DNA-directed), epsilon 4 (p12 subunit)          | 489 | 488 | 472 |
| 18975  | Polg     | polymerase (DNA directed), gamma                            | 146 | 142 | 146 |
| 50776  | Polg2    | polymerase (DNA directed), gamma 2, accessory subunit       | 37  | 40  | 40  |

|        |         |                                                                       |      |      |      |
|--------|---------|-----------------------------------------------------------------------|------|------|------|
| 80905  | Polh    | polymerase (DNA directed), eta (RAD 30 related)                       | 51   | 59   | 60   |
| 26447  | Poli    | polymerase (DNA directed), iota                                       | 122  | 123  | 125  |
| 27015  | Polk    | polymerase (DNA directed), kappa                                      | 88   | 92   | 91   |
| 56626  | Poll    | polymerase (DNA directed), lambda                                     | 257  | 258  | 249  |
| 54125  | Polm    | polymerase (DNA directed), mu                                         | 76   | 76   | 76   |
| 272158 | Poln    | DNA polymerase N                                                      | 23   | 22   | 25   |
| 77782  | Polq    | polymerase (DNA directed), theta                                      | 505  | 509  | 496  |
| 20019  | Polr1a  | polymerase (RNA) I polypeptide A                                      | 256  | 247  | 242  |
| 20017  | Polr1b  | polymerase (RNA) I polypeptide B                                      | 88   | 82   | 85   |
| 20016  | Polr1c  | polymerase (RNA) I polypeptide C                                      | 22   | 20   | 19   |
| 64424  | Polr1e  | polymerase (RNA) I polypeptide E                                      | 89   | 90   | 87   |
| 20020  | Polr2a  | polymerase (RNA) II (DNA directed) polypeptide A                      | 93   | 90   | 91   |
| 231329 | Polr2b  | polymerase (RNA) II (DNA directed) polypeptide B                      | 135  | 124  | 134  |
| 20021  | Polr2c  | polymerase (RNA) II (DNA directed) polypeptide C                      | 44   | 48   | 54   |
| 69241  | Polr2d  | polymerase (RNA) II (DNA directed) polypeptide D                      | 58   | 57   | 59   |
| 66420  | Polr2e  | polymerase (RNA) II (DNA directed) polypeptide E                      | 49   | 44   | 45   |
| 69833  | Polr2f  | polymerase (RNA) II (DNA directed) polypeptide F                      | 28   | 29   | 30   |
| 67710  | Polr2g  | polymerase (RNA) II (DNA directed) polypeptide G                      | 19   | 22   | 23   |
| 245841 | Polr2h  | polymerase (RNA) II (DNA directed) polypeptide H                      | 16   | 16   | 15   |
| 69920  | Polr2i  | polymerase (RNA) II (DNA directed) polypeptide I                      | 70   | 60   | 61   |
| 20022  | Polr2j  | polymerase (RNA) II (DNA directed) polypeptide J                      | 70   | 67   | 64   |
| 17749  | Polr2k  | polymerase (RNA) II (DNA directed) polypeptide K                      | 18   | 18   | 21   |
| 66491  | Polr2l  | polymerase (RNA) II (DNA directed) polypeptide L                      | 8    | 9    | 7    |
| 218832 | Polr3a  | polymerase (RNA) III (DNA directed) polypeptide A                     | 260  | 254  | 262  |
| 70428  | Polr3b  | polymerase (RNA) III (DNA directed) polypeptide B                     | 223  | 235  | 222  |
| 74414  | Polr3c  | polymerase (RNA) III (DNA directed) polypeptide C                     | 28   | 27   | 27   |
| 67065  | Polr3d  | polymerase (RNA) III (DNA directed) polypeptide D                     | 20   | 18   | 20   |
| 26939  | Polr3e  | polymerase (RNA) III (DNA directed) polypeptide E                     | 182  | 170  | 180  |
| 70408  | Polr3f  | polymerase (RNA) III (DNA directed) polypeptide F                     | 29   | 32   | 31   |
| 67486  | Polr3g  | polymerase (RNA) III (DNA directed) polypeptide G                     | 73   | 69   | 70   |
| 78929  | Polr3h  | polymerase (RNA) III (DNA directed) polypeptide H                     | 87   | 80   | 85   |
| 67005  | Polr3k  | polymerase (RNA) III (DNA directed) polypeptide K                     | 192  | 189  | 195  |
| 216151 | Polrmt  | polymerase (RNA) mitochondrial (DNA directed)                         | 45   | 43   | 44   |
| 18976  | Pomc    | pro-opiomelanocortin-alpha                                            | 195  | 189  | 187  |
| 68273  | Pomgnt1 | protein O-linked mannose beta 1,2-N-acetylglucosaminyltransferase     | 27   | 29   | 30   |
| 99011  | Pomt1   | protein-O-mannosyltransferase 1                                       | 138  | 136  | 141  |
| 217734 | Pomt2   | protein-O-mannosyltransferase 2                                       | 69   | 70   | 71   |
| 18979  | Pon1    | paraoxonase 1                                                         | 460  | 458  | 449  |
| 330260 | Pon2    | paraoxonase 2                                                         | 167  | 156  | 160  |
| 269823 | Pon3    | paraoxonase 3                                                         | 128  | 135  | 131  |
| 67724  | Pop1    | processing of precursor 1, ribonuclease P/MRP family, (S. cerevisiae) | 236  | 235  | 228  |
| 66161  | Pop4    | processing of precursor 4, ribonuclease P/MRP family, (S. cerevisiae) | 390  | 388  | 384  |
| 117109 | Pop5    | processing of precursor 5, ribonuclease P/MRP family (S. cerevisiae)  | 112  | 106  | 115  |
| 74097  | Pop7    | processing of precursor 7, ribonuclease P family, (S. cerevisiae)     | 45   | 40   | 42   |
| 18984  | Por     | P450 (cytochrome) oxidoreductase                                      | 147  | 148  | 146  |
| 53627  | Porcn   | porcupine homolog (Drosophila)                                        | 79   | 68   | 69   |
| 101185 | Pot1a   | protection of telomeres 1A                                            | 2777 | 2794 | 2727 |
| 72836  | Pot1b   | protection of telomeres 1B                                            | 170  | 163  | 157  |
| 18736  | Pou1f1  | POU domain, class 1, transcription factor 1                           | 565  | 580  | 558  |
| 18985  | Pou2af1 | POU domain, class 2, associating factor 1                             | 210  | 220  | 202  |
| 18986  | Pou2f1  | POU domain, class 2, transcription factor 1                           | 521  | 529  | 519  |
| 18987  | Pou2f2  | POU domain, class 2, transcription factor 2                           | 171  | 172  | 179  |
| 18988  | Pou2f3  | POU domain, class 2, transcription factor 3                           | 157  | 154  | 156  |
| 18991  | Pou3f1  | POU domain, class 3, transcription factor 1                           | 999  | 972  | 999  |
| 18992  | Pou3f2  | POU domain, class 3, transcription factor 2                           | 2661 | 2699 | 2655 |

|        |          |                                                                          |      |      |      |
|--------|----------|--------------------------------------------------------------------------|------|------|------|
| 18993  | Pou3f3   | POU domain, class 3, transcription factor 3                              | 4    | 2    | 3    |
| 18994  | Pou3f4   | POU domain, class 3, transcription factor 4                              | 847  | 862  | 812  |
| 18996  | Pou4f1   | POU domain, class 4, transcription factor 1                              | 857  | 850  | 847  |
| 18997  | Pou4f2   | POU domain, class 4, transcription factor 2                              | 382  | 364  | 368  |
| 18999  | Pou5f1   | POU domain, class 5, transcription factor 1                              | 58   | 60   | 62   |
| 75507  | Pou5f2   | POU domain class 5, transcription factor 2                               | 612  | 624  | 610  |
| 19009  | Pou6f1   | POU domain, class 6, transcription factor 1                              | 84   | 75   | 83   |
| 218030 | Pou6f2   | POU domain, class 6, transcription factor 2                              | 932  | 929  | 935  |
| 67895  | Ppa1     | pyrophosphatase (inorganic) 1                                            | 112  | 117  | 98   |
| 74776  | Ppa2     | pyrophosphatase (inorganic) 2                                            | 392  | 396  | 398  |
| 19012  | Ppap2a   | phosphatidic acid phosphatase type 2A                                    | 335  | 353  | 341  |
| 67916  | Ppap2b   | phosphatidic acid phosphatase type 2B                                    | 1543 | 1555 | 1538 |
| 50784  | Ppap2c   | phosphatidic acid phosphatase type 2C                                    | 99   | 105  | 106  |
| 381925 | Ppapdc1a | phosphatidic acid phosphatase type 2 domain containing 1A                | 1108 | 1097 | 1087 |
| 71910  | Ppapdc1b | phosphatidic acid phosphatase type 2 domain containing 1B                | 139  | 149  | 146  |
| 19013  | Ppara    | peroxisome proliferator activated receptor alpha                         | 136  | 126  | 124  |
| 19015  | Ppard    | peroxisome proliferator activator receptor delta                         | 142  | 137  | 134  |
| 19016  | Pparg    | peroxisome proliferator activated receptor gamma                         | 459  | 460  | 471  |
| 19017  | Ppargc1a | peroxisome proliferative activated receptor, gamma, coactivator 1 alpha  | 2674 | 2757 | 2689 |
| 170826 | Ppargc1b | peroxisome proliferative activated receptor, gamma, coactivator 1 beta   | 401  | 406  | 409  |
| 231327 | Ppat     | phosphoribosyl pyrophosphate amidotransferase                            | 32   | 29   | 30   |
| 66812  | Ppcdc    | phosphopantothenoylecysteine decarboxylase                               | 268  | 261  | 271  |
| 237178 | Ppef1    | protein phosphatase with EF hand calcium-binding domain 1                | 323  | 324  | 312  |
| 19023  | Ppef2    | protein phosphatase, EF hand calcium-binding domain 2                    | 81   | 78   | 80   |
| 19024  | Ppfibp2  | PTPRF interacting protein, binding protein 2 (liprin beta 2)             | 260  | 271  | 265  |
| 19035  | Ppib     | peptidylprolyl isomerase B                                               | 218  | 203  | 212  |
| 19038  | Ppic     | peptidylprolyl isomerase C                                               | 280  | 275  | 281  |
| 67738  | Ppid     | peptidylprolyl isomerase D (cyclophilin D)                               | 81   | 76   | 79   |
| 56031  | Ppie     | peptidylprolyl isomerase E (cyclophilin E)                               | 91   | 89   | 81   |
| 105675 | Ppif     | peptidylprolyl isomerase F (cyclophilin F)                               | 147  | 155  | 142  |
| 228005 | Ppig     | peptidyl-prolyl isomerase G (cyclophilin G)                              | 93   | 98   | 98   |
| 66101  | Ppih     | peptidyl prolyl isomerase H                                              | 157  | 152  | 164  |
| 68816  | Ppil1    | peptidylprolyl isomerase (cyclophilin)-like 1                            | 41   | 42   | 44   |
| 66053  | Ppil2    | peptidylprolyl isomerase (cyclophilin)-like 2                            | 71   | 72   | 74   |
| 70225  | Ppil3    | peptidylprolyl isomerase (cyclophilin)-like 3                            | 33   | 34   | 30   |
| 67418  | Ppil4    | peptidylprolyl isomerase (cyclophilin)-like 4                            | 62   | 62   | 70   |
| 73075  | Ppil6    | peptidylprolyl isomerase (cyclophilin)-like 6                            | 38   | 36   | 34   |
| 327655 | Ppip5k1  | diphosphoinositol pentakisphosphate kinase 1                             | 85   | 86   | 90   |
| 227399 | Ppip5k2  | diphosphoinositol pentakisphosphate kinase 2                             | 134  | 138  | 141  |
| 19042  | Ppm1a    | protein phosphatase 1A, magnesium dependent, alpha isoform               | 337  | 325  | 331  |
| 19043  | Ppm1b    | protein phosphatase 1B, magnesium dependent, beta isoform                | 332  | 325  | 325  |
| 53892  | Ppm1d    | protein phosphatase 1D magnesium-dependent, delta isoform                | 158  | 155  | 152  |
| 320472 | Ppm1e    | protein phosphatase 1E (PP2C domain containing)                          | 363  | 356  | 359  |
| 68606  | Ppm1f    | protein phosphatase 1F (PP2C domain containing)                          | 156  | 153  | 147  |
| 14208  | Ppm1g    | protein phosphatase 1G (formerly 2C), magnesium-dependent, gamma isoform | 50   | 50   | 49   |
| 71887  | Ppm1j    | protein phosphatase 1J                                                   | 12   | 11   | 15   |
| 243382 | Ppm1k    | protein phosphatase 1K (PP2C domain containing)                          | 193  | 189  | 184  |
| 242083 | Ppm1l    | protein phosphatase 1 (formerly 2C)-like                                 | 485  | 490  | 485  |
| 67905  | Ppm1m    | protein phosphatase 1M                                                   | 27   | 34   | 31   |
| 72590  | Ppme1    | protein phosphatase methylesterase 1                                     | 108  | 108  | 109  |
| 19044  | Ppox     | protoporphyrinogen oxidase                                               | 21   | 20   | 25   |
| 19045  | Ppp1ca   | protein phosphatase 1, catalytic subunit, alpha isoform                  | 9    | 13   | 11   |
| 19046  | Ppp1cb   | protein phosphatase 1, catalytic subunit, beta isoform                   | 338  | 333  | 335  |
| 19047  | Ppp1cc   | protein phosphatase 1, catalytic subunit, gamma isoform                  | 92   | 92   | 88   |
| 52040  | Ppp1r10  | protein phosphatase 1, regulatory subunit 10                             | 1    | 2    | 2    |

|        |          |                                                                       |      |      |      |
|--------|----------|-----------------------------------------------------------------------|------|------|------|
| 17931  | Ppp1r12a | protein phosphatase 1, regulatory (inhibitor) subunit 12A             | 532  | 533  | 519  |
| 333654 | Ppp1r13l | protein phosphatase 1, regulatory (inhibitor) subunit 13 like         | 27   | 26   | 26   |
| 108954 | Ppp1r15b | protein phosphatase 1, regulatory (inhibitor) subunit 15b             | 260  | 267  | 253  |
| 58200  | Ppp1r1a  | protein phosphatase 1, regulatory (inhibitor) subunit 1A              | 78   | 81   | 81   |
| 19049  | Ppp1r1b  | protein phosphatase 1, regulatory (inhibitor) subunit 1B              | 33   | 34   | 32   |
| 66849  | Ppp1r2   | protein phosphatase 1, regulatory (inhibitor) subunit 2               | 144  | 149  | 153  |
| 140491 | Ppp1r3a  | protein phosphatase 1, regulatory (inhibitor) subunit 3A              | 1285 | 1300 | 1277 |
| 244416 | Ppp1r3b  | protein phosphatase 1, regulatory (inhibitor) subunit 3B              | 678  | 687  | 667  |
| 53412  | Ppp1r3c  | protein phosphatase 1, regulatory (inhibitor) subunit 3C              | 182  | 183  | 182  |
| 100336 | Ppp1r8   | protein phosphatase 1, regulatory (inhibitor) subunit 8               | 113  | 121  | 115  |
| 19052  | Ppp2ca   | protein phosphatase 2 (formerly 2A), catalytic subunit, alpha isoform | 165  | 166  | 158  |
| 19053  | Ppp2cb   | protein phosphatase 2 (formerly 2A), catalytic subunit, beta isoform  | 87   | 91   | 93   |
| 51792  | Ppp2r1a  | protein phosphatase 2 (formerly 2A), regulatory subunit A (PR 65),    | 105  | 104  | 104  |
| 71978  | Ppp2r2a  | protein phosphatase 2 (formerly 2A), regulatory subunit B (PR 52),    | 294  | 291  | 291  |
| 110854 | Ppp2r4   | protein phosphatase 2A, regulatory subunit B (PR 53)                  | 74   | 74   | 83   |
| 226849 | Ppp2r5a  | protein phosphatase 2, regulatory subunit B (B56), alpha isoform      | 321  | 327  | 310  |
| 225849 | Ppp2r5b  | protein phosphatase 2, regulatory subunit B (B56), beta isoform       | 22   | 16   | 17   |
| 26931  | Ppp2r5c  | protein phosphatase 2, regulatory subunit B (B56), gamma isoform      | 451  | 458  | 442  |
| 21770  | Ppp2r5d  | protein phosphatase 2, regulatory subunit B (B56), delta isoform      | 39   | 37   | 41   |
| 19055  | Ppp3ca   | protein phosphatase 3, catalytic subunit, alpha isoform               | 1255 | 1276 | 1280 |
| 19056  | Ppp3cb   | protein phosphatase 3, catalytic subunit, beta isoform                | 98   | 97   | 94   |
| 19058  | Ppp3r1   | protein phosphatase 3, regulatory subunit B, alpha isoform (calcine   | 191  | 205  | 198  |
| 19059  | Ppp3r2   | protein phosphatase 3, regulatory subunit B, alpha isoform (calcine   | 283  | 277  | 277  |
| 56420  | Ppp4c    | protein phosphatase 4, catalytic subunit                              | 21   | 21   | 22   |
| 232314 | Ppp4r2   | protein phosphatase 4, regulatory subunit 2                           | 872  | 893  | 859  |
| 19060  | Ppp5c    | protein phosphatase 5, catalytic subunit                              | 77   | 81   | 79   |
| 67857  | Ppp6c    | protein phosphatase 6, catalytic subunit                              | 4328 | 4414 | 4296 |
| 226169 | Pprc1    | peroxisome proliferative activated receptor, gamma, coactivator-rel   | 42   | 38   | 42   |
| 19063  | Ppt1     | palmitoyl-protein thioesterase 1                                      | 277  | 250  | 256  |
| 54397  | Ppt2     | palmitoyl-protein thioesterase 2                                      | 15   | 15   | 18   |
| 238831 | Ppwd1    | peptidylprolyl isomerase domain and WD repeat containing 1            | 63   | 64   | 64   |
| 54633  | Pqbp1    | polyglutamine binding protein 1                                       | 16   | 15   | 16   |
| 72461  | Prcp     | prolylcarboxypeptidase (angiotensinase C)                             | 261  | 269  | 266  |
| 12142  | Prdm1    | PR domain containing 1, with ZNF domain                               | 918  | 920  | 888  |
| 382066 | Prdm10   | PR domain containing 10                                               | 151  | 142  | 147  |
| 70673  | Prdm16   | PR domain containing 16                                               | 473  | 452  | 460  |
| 72843  | Prdm4    | PR domain containing 4                                                | 68   | 73   | 69   |
| 70779  | Prdm5    | PR domain containing 5                                                | 355  | 350  | 347  |
| 225518 | Prdm6    | PR domain containing 6                                                | 416  | 423  | 411  |
| 77630  | Prdm8    | PR domain containing 8                                                | 281  | 289  | 283  |
| 213389 | Prdm9    | PR domain containing 9                                                | 228  | 227  | 232  |
| 18477  | Prdx1    | peroxiredoxin 1                                                       | 75   | 74   | 74   |
| 21672  | Prdx2    | peroxiredoxin 2                                                       | 16   | 18   | 17   |
| 11757  | Prdx3    | peroxiredoxin 3                                                       | 39   | 39   | 40   |
| 53381  | Prdx4    | peroxiredoxin 4                                                       | 417  | 432  | 422  |
| 54683  | Prdx5    | peroxiredoxin 5                                                       | 68   | 65   | 63   |
| 11758  | Prdx6    | peroxiredoxin 6                                                       | 307  | 299  | 311  |
| 50907  | Preb     | prolactin regulatory element binding                                  | 21   | 24   | 25   |
| 19072  | Prep     | prolyl endopeptidase                                                  | 1065 | 1078 | 1067 |
| 213760 | Prepl    | prolyl endopeptidase-like                                             | 82   | 81   | 89   |
| 53856  | Prg3     | proteoglycan 3                                                        | 73   | 73   | 68   |
| 231903 | Prhoxnb  | parahox cluster neighbor                                              | 128  | 127  | 129  |
| 106042 | Prickle1 | prickle homolog 1 (Drosophila)                                        | 1294 | 1293 | 1243 |
| 19075  | Prim1    | DNA primase, p49 subunit                                              | 43   | 36   | 36   |
| 19076  | Prim2    | DNA primase, p58 subunit                                              | 1443 | 1445 | 1407 |

|        |         |                                                                    |      |      |      |
|--------|---------|--------------------------------------------------------------------|------|------|------|
| 170952 | Prima1  | proline rich membrane anchor 1                                     | 483  | 497  | 478  |
| 105787 | Prkaa1  | protein kinase, AMP-activated, alpha 1 catalytic subunit           | 86   | 80   | 92   |
| 108079 | Prkaa2  | protein kinase, AMP-activated, alpha 2 catalytic subunit           | 310  | 310  | 287  |
| 19079  | Prkab1  | protein kinase, AMP-activated, beta 1 non-catalytic subunit        | 301  | 304  | 300  |
| 108097 | Prkab2  | protein kinase, AMP-activated, beta 2 non-catalytic subunit        | 180  | 176  | 173  |
| 18747  | Prkaca  | protein kinase, cAMP dependent, catalytic, alpha                   | 56   | 51   | 48   |
| 18749  | Prkacb  | protein kinase, cAMP dependent, catalytic, beta                    | 309  | 319  | 305  |
| 19082  | Prkag1  | protein kinase, AMP-activated, gamma 1 non-catalytic subunit       | 75   | 73   | 80   |
| 108099 | Prkag2  | protein kinase, AMP-activated, gamma 2 non-catalytic subunit       | 583  | 589  | 568  |
| 241113 | Prkag3  | protein kinase, AMP-activated, gamma 3 non-catalytic subunit       | 80   | 80   | 79   |
| 19084  | Prkar1a | protein kinase, cAMP dependent regulatory, type I, alpha           | 137  | 135  | 144  |
| 19085  | Prkar1b | protein kinase, cAMP dependent regulatory, type I beta             | 189  | 203  | 199  |
| 19087  | Prkar2a | protein kinase, cAMP dependent regulatory, type II alpha           | 172  | 170  | 174  |
| 19088  | Prkar2b | protein kinase, cAMP dependent regulatory, type II beta            | 334  | 333  | 322  |
| 18750  | Prkca   | protein kinase C, alpha                                            | 606  | 603  | 627  |
| 18751  | Prkcb   | protein kinase C, beta                                             | 599  | 563  | 577  |
| 18752  | Prkcc   | protein kinase C, gamma                                            | 54   | 49   | 47   |
| 18753  | Prkcd   | protein kinase C, delta                                            | 125  | 119  | 137  |
| 18754  | Prkce   | protein kinase C, epsilon                                          | 773  | 783  | 780  |
| 18755  | Prkch   | protein kinase C, eta                                              | 463  | 466  | 455  |
| 18759  | Prkci   | protein kinase C, iota                                             | 163  | 158  | 161  |
| 18761  | Prkck   | protein kinase C, theta                                            | 1233 | 1241 | 1244 |
| 19089  | Prkcsh  | protein kinase C substrate 80K-H                                   | 60   | 61   | 66   |
| 18762  | Prkcz   | protein kinase C, zeta                                             | 219  | 212  | 217  |
| 18760  | Prkd1   | protein kinase D1                                                  | 2458 | 2479 | 2419 |
| 101540 | Prkd2   | protein kinase D2                                                  | 82   | 71   | 75   |
| 75292  | Prkd3   | protein kinase D3                                                  | 157  | 159  | 157  |
| 19090  | Prkdc   | protein kinase, DNA activated, catalytic polypeptide               | 292  | 290  | 285  |
| 19091  | Prkg1   | protein kinase, cGMP-dependent, type I                             | 936  | 952  | 942  |
| 19092  | Prkg2   | protein kinase, cGMP-dependent, type II                            | 510  | 524  | 515  |
| 23992  | Prkra   | protein kinase, interferon inducible double stranded RNA dependent | 298  | 315  | 306  |
| 66801  | Prkrip1 | Prkr interacting protein 1 (IL11 inducible)                        | 92   | 93   | 100  |
| 72981  | Prkrir  | protein-kinase, interferon-inducible double stranded RNA dependent | 220  | 231  | 224  |
| 19108  | Prkx    | protein kinase, X-linked                                           | 216  | 218  | 211  |
| 18811  | Prl2c2  | prolactin family 2, subfamily c, member 2                          | 491  | 482  | 485  |
| 623503 | Prlh    | prolactin releasing hormone                                        | 61   | 71   | 59   |
| 226278 | Prlhr   | prolactin releasing hormone receptor                               | 469  | 468  | 457  |
| 19118  | Prm1    | protamine 1                                                        | 54   | 55   | 56   |
| 19119  | Prm2    | protamine 2                                                        | 6    | 9    | 6    |
| 19120  | Prm3    | protamine 3                                                        | 5    | 4    | 4    |
| 15469  | Prmt1   | protein arginine N-methyltransferase 1                             | 24   | 29   | 26   |
| 102182 | Prmt10  | protein arginine methyltransferase 10 (putative)                   | 119  | 120  | 109  |
| 15468  | Prmt2   | protein arginine N-methyltransferase 2                             | 61   | 58   | 59   |
| 71974  | Prmt3   | protein arginine N-methyltransferase 3                             | 197  | 188  | 193  |
| 27374  | Prmt5   | protein arginine N-methyltransferase 5                             | 102  | 93   | 101  |
| 99890  | Prmt6   | protein arginine N-methyltransferase 6                             | 3773 | 3836 | 3714 |
| 214572 | Prmt7   | protein arginine N-methyltransferase 7                             | 166  | 157  | 166  |
| 381813 | Prmt8   | protein arginine N-methyltransferase 8                             | 401  | 394  | 404  |
| 19122  | Prnp    | prion protein                                                      | 116  | 116  | 113  |
| 19123  | Proc    | protein C                                                          | 121  | 125  | 121  |
| 19125  | Prodh   | proline dehydrogenase                                              | 91   | 96   | 91   |
| 56189  | Prodh2  | proline dehydrogenase (oxidase) 2                                  | 66   | 67   | 69   |
| 246691 | Prok1   | prokineticin 1                                                     | 74   | 74   | 72   |
| 19127  | Prop1   | paired like homeodomain factor 1                                   | 45   | 52   | 49   |
| 19130  | Prox1   | prospero-related homeobox 1                                        | 1264 | 1293 | 1256 |

|        |         |                                                               |      |      |      |
|--------|---------|---------------------------------------------------------------|------|------|------|
| 73422  | Prox2   | prospero homeobox 2                                           | 152  | 151  | 148  |
| 66901  | Proz    | protein Z, vitamin K-dependent plasma glycoprotein            | 91   | 87   | 92   |
| 67229  | Prpf18  | PRP18 pre-mRNA processing factor 18 homolog (yeast)           | 197  | 215  | 209  |
| 28000  | Prpf19  | PRP19/PSO4 pre-mRNA processing factor 19 homolog (S. cerevis) | 49   | 54   | 53   |
| 70767  | Prpf3   | PRP3 pre-mRNA processing factor 3 homolog (yeast)             | 73   | 65   | 65   |
| 68988  | Prpf31  | PRP31 pre-mRNA processing factor 31 homolog (yeast)           | 22   | 22   | 19   |
| 230596 | Prpf38a | PRP38 pre-mRNA processing factor 38 (yeast) domain containing | 146  | 153  | 149  |
| 66921  | Prpf38b | PRP38 pre-mRNA processing factor 38 (yeast) domain containing | 62   | 59   | 65   |
| 328110 | Prpf39  | PRP39 pre-mRNA processing factor 39 homolog (yeast)           | 133  | 141  | 137  |
| 70052  | Prpf4   | PRP4 pre-mRNA processing factor 4 homolog (yeast)             | 33   | 34   | 31   |
| 56194  | Prpf40a | PRP40 pre-mRNA processing factor 40 homolog A (yeast)         | 421  | 428  | 427  |
| 54614  | Prpf40b | PRP40 pre-mRNA processing factor 40 homolog B (yeast)         | 99   | 104  | 100  |
| 19134  | Prpf4b  | PRP4 pre-mRNA processing factor 4 homolog B (yeast)           | 226  | 230  | 224  |
| 68879  | Prpf6   | PRP6 pre-mRNA splicing factor 6 homolog (yeast)               | 97   | 97   | 96   |
| 192159 | Prpf8   | pre-mRNA processing factor 8                                  | 49   | 57   | 53   |
| 19139  | Prps1   | phosphoribosyl pyrophosphate synthetase 1                     | 203  | 193  | 194  |
| 75456  | Prps111 | phosphoribosyl pyrophosphate synthetase 1-like 1              | 663  | 666  | 660  |
| 328099 | Prps113 | phosphoribosyl pyrophosphate synthetase 1-like 3              | 40   | 47   | 43   |
| 110639 | Prps2   | phosphoribosyl pyrophosphate synthetase 2                     | 1504 | 1549 | 1469 |
| 67763  | Prpsap1 | phosphoribosyl pyrophosphate synthetase-associated protein 1  | 105  | 99   | 99   |
| 212627 | Prpsap2 | phosphoribosyl pyrophosphate synthetase-associated protein 2  | 182  | 191  | 174  |
| 66151  | Prr13   | proline rich 13                                               | 32   | 39   | 33   |
| 18933  | Prrx1   | paired related homeobox 1                                     | 409  | 407  | 384  |
| 107751 | Prrx11  | paired related homeobox protein-like 1                        | 214  | 217  | 211  |
| 114228 | Prss1   | protease, serine, 1 (trypsin 1)                               | 93   | 99   | 98   |
| 19142  | Prss12  | protease, serine, 12 neurotrypsin (motopsin)                  | 155  | 158  | 162  |
| 54373  | Prss16  | protease, serine, 16 (thymus)                                 | 76   | 66   | 70   |
| 22072  | Prss2   | protease, serine, 2                                           | 186  | 179  | 186  |
| 57256  | Prss21  | protease, serine, 21                                          | 33   | 39   | 38   |
| 70835  | Prss22  | protease, serine, 22                                          | 80   | 85   | 78   |
| 76453  | Prss23  | protease, serine, 23                                          | 296  | 305  | 292  |
| 213171 | Prss27  | protease, serine, 27                                          | 100  | 90   | 98   |
| 114661 | Prss28  | protease, serine, 28                                          | 27   | 24   | 26   |
| 114662 | Prss29  | protease, serine, 29                                          | 50   | 50   | 50   |
| 22073  | Prss3   | protease, serine, 3                                           | 50   | 48   | 46   |
| 30943  | Prss30  | protease, serine, 30                                          | 57   | 57   | 54   |
| 69814  | Prss32  | protease, serine, 32                                          | 30   | 33   | 31   |
| 353130 | Prss33  | protease, serine, 33                                          | 19   | 19   | 20   |
| 328780 | Prss34  | protease, serine, 34                                          | 47   | 50   | 46   |
| 244954 | Prss35  | protease, serine, 35                                          | 183  | 192  | 193  |
| 77613  | Prss36  | protease, serine, 36                                          | 50   | 44   | 46   |
| 67690  | Prss37  | protease, serine, 37                                          | 66   | 68   | 68   |
| 216797 | Prss38  | protease, serine, 38                                          | 178  | 175  | 185  |
| 21755  | Prss39  | protease, serine, 39                                          | 98   | 88   | 94   |
| 21756  | Prss40  | protease, serine, 40                                          | 57   | 58   | 54   |
| 71003  | Prss41  | protease, serine, 41                                          | 20   | 20   | 25   |
| 235628 | Prss42  | protease, serine, 42                                          | 63   | 66   | 64   |
| 73336  | Prss44  | protease, serine, 44                                          | 38   | 35   | 40   |
| 260408 | Prss45  | protease, serine, 45                                          | 23   | 22   | 23   |
| 368202 | Prss48  | protease, serine, 48                                          | 255  | 265  | 261  |
| 235631 | Prss50  | protease, serine, 50                                          | 42   | 41   | 44   |
| 73382  | Prss52  | protease, serine, 52                                          | 453  | 467  | 460  |
| 330657 | Prss53  | protease, serine, 53                                          | 24   | 25   | 27   |
| 70993  | Prss54  | protease, serine, 54                                          | 128  | 131  | 123  |
| 73106  | Prss57  | protease, serine 57                                           | 22   | 21   | 21   |

|        |         |                                                                   |      |      |      |
|--------|---------|-------------------------------------------------------------------|------|------|------|
| 232717 | Prss58  | protease, serine 58                                               | 68   | 68   | 63   |
| 76560  | Prss8   | protease, serine, 8 (prostasin)                                   | 41   | 42   | 40   |
| 19152  | Prtn3   | proteinase 3                                                      | 11   | 14   | 14   |
| 19156  | Psap    | prosaposin                                                        | 173  | 166  | 169  |
| 76943  | Psapl1  | prosaposin-like 1                                                 | 639  | 647  | 654  |
| 107272 | Psat1   | phosphoserine aminotransferase 1                                  | 1775 | 1768 | 1752 |
| 19164  | Psen1   | presenilin 1                                                      | 171  | 169  | 167  |
| 19165  | Psen2   | presenilin 2                                                      | 175  | 181  | 181  |
| 66340  | Psenen  | presenilin enhancer 2 homolog (C. elegans)                        | 4    | 5    | 5    |
| 26438  | Psg18   | pregnancy specific glycoprotein 18                                | 242  | 243  | 236  |
| 56868  | Psg23   | pregnancy-specific glycoprotein 23                                | 114  | 110  | 114  |
| 101739 | Psip1   | PC4 and SFRS1 interacting protein 1                               | 139  | 137  | 134  |
| 244631 | Pskh1   | protein serine kinase H1                                          | 53   | 51   | 48   |
| 26440  | Psma1   | proteasome (prosome, macropain) subunit, alpha type 1             | 199  | 217  | 214  |
| 19166  | Psma2   | proteasome (prosome, macropain) subunit, alpha type 2             | 22   | 23   | 22   |
| 19167  | Psma3   | proteasome (prosome, macropain) subunit, alpha type 3             | 105  | 104  | 90   |
| 26441  | Psma4   | proteasome (prosome, macropain) subunit, alpha type 4             | 41   | 47   | 41   |
| 26442  | Psma5   | proteasome (prosome, macropain) subunit, alpha type 5             | 72   | 68   | 73   |
| 26443  | Psma6   | proteasome (prosome, macropain) subunit, alpha type 6             | 248  | 254  | 259  |
| 26444  | Psma7   | proteasome (prosome, macropain) subunit, alpha type 7             | 22   | 22   | 22   |
| 73677  | Psma8   | proteasome (prosome, macropain) subunit, alpha type, 8            | 127  | 131  | 129  |
| 19170  | Psemb1  | proteasome (prosome, macropain) subunit, beta type 1              | 133  | 143  | 134  |
| 19171  | Psemb10 | proteasome (prosome, macropain) subunit, beta type 10             | 13   | 14   | 15   |
| 73902  | Psemb11 | proteasome (prosome, macropain) subunit, beta type, 11            | 27   | 27   | 25   |
| 26445  | Psemb2  | proteasome (prosome, macropain) subunit, beta type 2              | 160  | 168  | 165  |
| 26446  | Psemb3  | proteasome (prosome, macropain) subunit, beta type 3              | 56   | 56   | 57   |
| 19172  | Psemb4  | proteasome (prosome, macropain) subunit, beta type 4              | 116  | 129  | 123  |
| 19173  | Psemb5  | proteasome (prosome, macropain) subunit, beta type 5              | 7    | 9    | 9    |
| 19175  | Psemb6  | proteasome (prosome, macropain) subunit, beta type 6              | 28   | 25   | 28   |
| 19177  | Psemb7  | proteasome (prosome, macropain) subunit, beta type 7              | 259  | 257  | 262  |
| 16913  | Psemb8  | proteasome (prosome, macropain) subunit, beta type 8 (large multi | 22   | 17   | 22   |
| 16912  | Psemb9  | proteasome (prosome, macropain) subunit, beta type 9 (large multi | 43   | 44   | 45   |
| 19179  | Psmc1   | protease (prosome, macropain) 26S subunit, ATPase 1               | 247  | 249  | 246  |
| 19181  | Psmc2   | proteasome (prosome, macropain) 26S subunit, ATPase 2             | 111  | 101  | 103  |
| 19182  | Psmc3   | proteasome (prosome, macropain) 26S subunit, ATPase 3             | 50   | 48   | 44   |
| 19183  | Psmc3ip | proteasome (prosome, macropain) 26S subunit, ATPase 3, interac    | 42   | 46   | 43   |
| 23996  | Psmc4   | proteasome (prosome, macropain) 26S subunit, ATPase, 4            | 125  | 117  | 126  |
| 19184  | Psmc5   | protease (prosome, macropain) 26S subunit, ATPase 5               | 13   | 14   | 16   |
| 67089  | Psmc6   | proteasome (prosome, macropain) 26S subunit, ATPase, 6            | 46   | 41   | 44   |
| 53380  | Psmc10  | proteasome (prosome, macropain) 26S subunit, non-ATPase, 10       | 46   | 42   | 40   |
| 23997  | Psmc13  | proteasome (prosome, macropain) 26S subunit, non-ATPase, 13       | 21   | 26   | 24   |
| 59029  | Psmc14  | proteasome (prosome, macropain) 26S subunit, non-ATPase, 14       | 264  | 267  | 253  |
| 19185  | Psmc4   | proteasome (prosome, macropain) 26S subunit, non-ATPase, 4        | 120  | 124  | 122  |
| 66998  | Psmc5   | proteasome (prosome, macropain) 26S subunit, non-ATPase, 5        | 60   | 64   | 65   |
| 57296  | Psmc8   | proteasome (prosome, macropain) 26S subunit, non-ATPase, 8        | 57   | 60   | 61   |
| 67151  | Psmc9   | proteasome (prosome, macropain) 26S subunit, non-ATPase, 9        | 207  | 212  | 214  |
| 19192  | Psme3   | proteasome (prosome, macropain) 28 subunit, 3                     | 31   | 27   | 31   |
| 66645  | Pspc1   | paraspeckle protein 1                                             | 187  | 183  | 189  |
| 100678 | Psph    | phosphoserine phosphatase                                         | 85   | 80   | 80   |
| 56742  | Psrc1   | proline/serine-rich coiled-coil 1                                 | 61   | 56   | 61   |
| 214580 | Pstk    | phosphoseryl-tRNA kinase                                          | 62   | 63   | 63   |
| 19200  | Pstpip1 | proline-serine-threonine phosphatase-interacting protein 1        | 152  | 153  | 159  |
| 19204  | Ptafr   | platelet-activating factor receptor                               | 132  | 134  | 136  |
| 19205  | Ptbp1   | polypyrimidine tract binding protein 1                            | 43   | 43   | 38   |
| 56195  | Ptbp2   | polypyrimidine tract binding protein 2                            | 3347 | 3358 | 3224 |

|        |         |                                                                        |      |      |      |
|--------|---------|------------------------------------------------------------------------|------|------|------|
| 19206  | Ptch1   | patched homolog 1                                                      | 480  | 489  | 481  |
| 19210  | Ptdss1  | phosphatidylserine synthase 1                                          | 33   | 38   | 34   |
| 27388  | Ptdss2  | phosphatidylserine synthase 2                                          | 74   | 64   | 71   |
| 19211  | Pten    | phosphatase and tensin homolog                                         | 900  | 864  | 898  |
| 19212  | Pter    | phosphotriesterase related                                             | 726  | 747  | 738  |
| 19213  | Ptf1a   | pancreas specific transcription factor, 1a                             | 234  | 228  | 227  |
| 19214  | Ptgr    | prostaglandin D receptor                                               | 335  | 343  | 335  |
| 19215  | Ptgs    | prostaglandin D2 synthase (brain)                                      | 47   | 42   | 44   |
| 64292  | Ptges   | prostaglandin E synthase                                               | 139  | 131  | 136  |
| 96979  | Ptges2  | prostaglandin E synthase 2                                             | 52   | 53   | 56   |
| 56351  | Ptges3  | prostaglandin E synthase 3 (cytosolic)                                 | 59   | 58   | 62   |
| 19223  | Ptgis   | prostaglandin I2 (prostacyclin) synthase                               | 204  | 211  | 213  |
| 67103  | Ptgr1   | prostaglandin reductase 1                                              | 82   | 80   | 85   |
| 77219  | Ptgr2   | prostaglandin reductase 2                                              | 134  | 130  | 136  |
| 19224  | Ptgs1   | prostaglandin-endoperoxide synthase 1                                  | 295  | 295  | 298  |
| 19225  | Ptgs2   | prostaglandin-endoperoxide synthase 2                                  | 275  | 270  | 259  |
| 19226  | Pth     | parathyroid hormone                                                    | 182  | 185  | 198  |
| 114640 | Pth2    | parathyroid hormone 2                                                  | 33   | 28   | 34   |
| 19227  | Pthlh   | parathyroid hormone-like peptide                                       | 391  | 387  | 379  |
| 14083  | Ptk2    | PTK2 protein tyrosine kinase 2                                         | 420  | 417  | 430  |
| 19229  | Ptk2b   | PTK2 protein tyrosine kinase 2 beta                                    | 296  | 292  | 299  |
| 20459  | Ptk6    | PTK6 protein tyrosine kinase 6                                         | 32   | 37   | 33   |
| 71461  | Ptk7    | PTK7 protein tyrosine kinase 7                                         | 116  | 105  | 114  |
| 84113  | Ptov1   | prostate tumor over expressed gene 1                                   | 36   | 34   | 40   |
| 19243  | Ptp4a1  | protein tyrosine phosphatase 4a1                                       | 299  | 289  | 289  |
| 19244  | Ptp4a2  | protein tyrosine phosphatase 4a2                                       | 330  | 315  | 320  |
| 19245  | Ptp4a3  | protein tyrosine phosphatase 4a3                                       | 204  | 199  | 200  |
| 218232 | Ptpdc1  | protein tyrosine phosphatase domain containing 1                       | 170  | 163  | 170  |
| 30963  | Ptpla   | protein tyrosine phosphatase-like (proline instead of catalytic argini | 352  | 354  | 358  |
| 57874  | Ptplad1 | protein tyrosine phosphatase-like A domain containing 1                | 91   | 93   | 93   |
| 66775  | Ptplad2 | protein tyrosine phosphatase-like A domain containing 2                | 501  | 500  | 511  |
| 70757  | Ptplb   | protein tyrosine phosphatase-like (proline instead of catalytic argini | 469  | 472  | 487  |
| 66461  | Ptpmt1  | protein tyrosine phosphatase, mitochondrial 1                          | 47   | 44   | 51   |
| 19246  | Ptpn1   | protein tyrosine phosphatase, non-receptor type 1                      | 408  | 380  | 398  |
| 19247  | Ptpn11  | protein tyrosine phosphatase, non-receptor type 11                     | 251  | 248  | 261  |
| 19248  | Ptpn12  | protein tyrosine phosphatase, non-receptor type 12                     | 304  | 301  | 299  |
| 19249  | Ptpn13  | protein tyrosine phosphatase, non-receptor type 13                     | 522  | 532  | 519  |
| 19253  | Ptpn18  | protein tyrosine phosphatase, non-receptor type 18                     | 78   | 74   | 71   |
| 19255  | Ptpn2   | protein tyrosine phosphatase, non-receptor type 2                      | 173  | 180  | 170  |
| 19256  | Ptpn20  | protein tyrosine phosphatase, non-receptor type 20                     | 608  | 608  | 607  |
| 24000  | Ptpn21  | protein tyrosine phosphatase, non-receptor type 21                     | 150  | 163  | 154  |
| 19260  | Ptpn22  | protein tyrosine phosphatase, non-receptor type 22 (lymphoid)          | 108  | 108  | 97   |
| 104831 | Ptpn23  | protein tyrosine phosphatase, non-receptor type 23                     | 102  | 101  | 106  |
| 545622 | Ptpn3   | protein tyrosine phosphatase, non-receptor type 3                      | 566  | 559  | 549  |
| 19258  | Ptpn4   | protein tyrosine phosphatase, non-receptor type 4                      | 331  | 326  | 327  |
| 19259  | Ptpn5   | protein tyrosine phosphatase, non-receptor type 5                      | 171  | 173  | 175  |
| 15170  | Ptpn6   | protein tyrosine phosphatase, non-receptor type 6                      | 36   | 38   | 37   |
| 320139 | Ptpn7   | protein tyrosine phosphatase, non-receptor type 7                      | 17   | 16   | 17   |
| 56294  | Ptpn9   | protein tyrosine phosphatase, non-receptor type 9                      | 160  | 157  | 154  |
| 19262  | Ptpra   | protein tyrosine phosphatase, receptor type, A                         | 178  | 174  | 178  |
| 19263  | Ptprb   | protein tyrosine phosphatase, receptor type, B                         | 313  | 304  | 299  |
| 19264  | Ptprc   | protein tyrosine phosphatase, receptor type, C                         | 379  | 389  | 370  |
| 19266  | Ptprd   | protein tyrosine phosphatase, receptor type, D                         | 7623 | 7711 | 7501 |
| 19267  | Ptpre   | protein tyrosine phosphatase, receptor type, E                         | 49   | 51   | 49   |
| 19268  | Ptprf   | protein tyrosine phosphatase, receptor type, F                         | 222  | 219  | 230  |

|        |         |                                                                  |      |      |      |
|--------|---------|------------------------------------------------------------------|------|------|------|
| 19270  | Ptprg   | protein tyrosine phosphatase, receptor type, G                   | 1414 | 1439 | 1423 |
| 19271  | Ptprj   | protein tyrosine phosphatase, receptor type, J                   | 475  | 456  | 473  |
| 19272  | Ptprk   | protein tyrosine phosphatase, receptor type, K                   | 1327 | 1324 | 1343 |
| 19274  | Ptprm   | protein tyrosine phosphatase, receptor type, M                   | 1303 | 1343 | 1336 |
| 19275  | Ptprn   | protein tyrosine phosphatase, receptor type, N                   | 53   | 52   | 59   |
| 19276  | Ptprn2  | protein tyrosine phosphatase, receptor type, N polypeptide 2     | 973  | 979  | 962  |
| 19277  | Ptpro   | protein tyrosine phosphatase, receptor type, O                   | 839  | 828  | 811  |
| 237523 | Ptprq   | protein tyrosine phosphatase, receptor type, Q                   | 530  | 527  | 517  |
| 19279  | Ptprr   | protein tyrosine phosphatase, receptor type, R                   | 659  | 662  | 647  |
| 19280  | Ptprs   | protein tyrosine phosphatase, receptor type, S                   | 214  | 212  | 219  |
| 19281  | Ptprt   | protein tyrosine phosphatase, receptor type, T                   | 2011 | 1993 | 1965 |
| 19273  | Ptpru   | protein tyrosine phosphatase, receptor type, U                   | 1146 | 1137 | 1150 |
| 13924  | Ptprv   | protein tyrosine phosphatase, receptor type, V                   | 31   | 35   | 35   |
| 19285  | Ptrf    | polymerase I and transcript release factor                       | 87   | 91   | 82   |
| 329384 | Ptrh1   | peptidyl-tRNA hydrolase 1 homolog ( <i>S. cerevisiae</i> )       | 8    | 12   | 10   |
| 217057 | Ptrh2   | peptidyl-tRNA hydrolase 2                                        | 99   | 93   | 95   |
| 19286  | Pts     | 6-pyruvoyl-tetrahydropterin synthase                             | 75   | 82   | 77   |
| 30939  | Pttg1   | pituitary tumor-transforming gene 1                              | 79   | 79   | 74   |
| 67959  | Puf60   | poly-U binding splicing factor 60                                | 29   | 22   | 24   |
| 19290  | Pura    | purine rich element binding protein A                            | 196  | 200  | 183  |
| 19291  | Purb    | purine rich element binding protein B                            | 97   | 95   | 102  |
| 56361  | Pus1    | pseudouridine synthase 1                                         | 50   | 51   | 46   |
| 74467  | Pus10   | pseudouridylate synthase 10                                      | 176  | 177  | 172  |
| 67049  | Pus3    | pseudouridine synthase 3                                         | 13   | 18   | 15   |
| 78895  | Pus7l   | pseudouridylate synthase 7 homolog ( <i>S. cerevisiae</i> )-like | 173  | 182  | 179  |
| 433813 | Pusl1   | pseudouridylate synthase-like 1                                  | 26   | 27   | 29   |
| 69675  | Pxdn    | peroxidase homolog ( <i>Drosophila</i> )                         | 767  | 763  | 765  |
| 218699 | Pxk     | PX domain containing serine/threonine kinase                     | 117  | 116  | 127  |
| 19302  | Pxmp3   | peroxisomal membrane protein 3                                   | 1767 | 1778 | 1743 |
| 19303  | Pxn     | paxillin                                                         | 89   | 95   | 102  |
| 209027 | Pycr1   | pyrroline-5-carboxylate reductase 1                              | 19   | 16   | 20   |
| 69051  | Pycr2   | pyrroline-5-carboxylate reductase family, member 2               | 55   | 53   | 52   |
| 66194  | Pycl    | pyrroline-5-carboxylate reductase-like                           | 25   | 27   | 24   |
| 110078 | Pygb    | brain glycogen phosphorylase                                     | 202  | 196  | 193  |
| 110095 | Pygl    | liver glycogen phosphorylase                                     | 251  | 253  | 248  |
| 19309  | Pygm    | muscle glycogen phosphorylase                                    | 47   | 42   | 46   |
| 232491 | Pyroxd1 | pyridine nucleotide-disulphide oxidoreductase domain 1           | 86   | 80   | 80   |
| 74580  | Pyroxd2 | pyridine nucleotide-disulphide oxidoreductase domain 2           | 215  | 212  | 205  |
| 97541  | Qars    | glutaminyl-tRNA synthetase                                       | 33   | 38   | 37   |
| 110391 | Qdpr    | quinoid dihydropteridine reductase                               | 829  | 839  | 837  |
| 19317  | Qk      | quaking                                                          | 853  | 814  | 835  |
| 70536  | Qpct    | glutaminyl-peptide cyclotransferase (glutaminyl cyclase)         | 440  | 440  | 425  |
| 67369  | Qpctl   | glutaminyl-peptide cyclotransferase-like                         | 37   | 35   | 38   |
| 67375  | Qprt    | quinolate phosphoribosyltransferase                              | 71   | 63   | 57   |
| 76563  | Qrs1    | glutaminyl-tRNA synthase (glutamine-hydrolyzing)-like 1          | 399  | 394  | 400  |
| 104009 | Qsox1   | quiescin Q6 sulfhydryl oxidase 1                                 | 305  | 305  | 309  |
| 227638 | Qsox2   | quiescin Q6 sulfhydryl oxidase 2                                 | 121  | 111  | 116  |
| 60507  | Qtrt1   | queuine tRNA-ribosyltransferase 1                                | 69   | 71   | 65   |
| 106248 | Qtrtd1  | queuine tRNA-ribosyltransferase domain containing 1              | 168  | 163  | 162  |
| 53869  | Rab11a  | RAB11a, member RAS oncogene family                               | 552  | 547  | 544  |
| 19326  | Rab11b  | RAB11B, member RAS oncogene family                               | 78   | 80   | 78   |
| 68328  | Rab13   | RAB13, member RAS oncogene family                                | 24   | 22   | 27   |
| 68365  | Rab14   | RAB14, member RAS oncogene family                                | 163  | 153  | 149  |
| 216344 | Rab21   | RAB21, member RAS oncogene family                                | 139  | 149  | 150  |
| 19334  | Rab22a  | RAB22A, member RAS oncogene family                               | 75   | 76   | 75   |

|        |          |                                                              |      |      |      |
|--------|----------|--------------------------------------------------------------|------|------|------|
| 19335  | Rab23    | RAB23, member RAS oncogene family                            | 117  | 109  | 117  |
| 19336  | Rab24    | RAB24, member RAS oncogene family                            | 148  | 153  | 155  |
| 59021  | Rab2a    | RAB2A, member RAS oncogene family                            | 567  | 587  | 582  |
| 19376  | Rab34    | RAB34, member of RAS oncogene family                         | 9    | 10   | 10   |
| 58222  | Rab37    | RAB37, member of RAS oncogene family                         | 132  | 125  | 134  |
| 19339  | Rab3a    | RAB3A, member RAS oncogene family                            | 45   | 40   | 43   |
| 69908  | Rab3b    | RAB3B, member RAS oncogene family                            | 198  | 202  | 196  |
| 19340  | Rab3d    | RAB3D, member RAS oncogene family                            | 104  | 93   | 102  |
| 19341  | Rab4a    | RAB4A, member RAS oncogene family                            | 267  | 265  | 264  |
| 271457 | Rab5a    | RAB5A, member RAS oncogene family                            | 100  | 96   | 101  |
| 19344  | Rab5b    | RAB5B, member RAS oncogene family                            | 41   | 38   | 39   |
| 19345  | Rab5c    | RAB5C, member RAS oncogene family                            | 58   | 57   | 60   |
| 19346  | Rab6     | RAB6, member RAS oncogene family                             | 31   | 32   | 29   |
| 19349  | Rab7     | RAB7, member RAS oncogene family                             | 136  | 131  | 136  |
| 56382  | Rab9     | RAB9, member RAS oncogene family                             | 81   | 81   | 79   |
| 56187  | Rabgga   | Rab geranylgeranyl transferase, a subunit                    | 35   | 36   | 42   |
| 19352  | Rabggb   | RAB geranylgeranyl transferase, b subunit                    | 49   | 43   | 49   |
| 19353  | Rac1     | RAS-related C3 botulinum substrate 1                         | 113  | 106  | 116  |
| 19354  | Rac2     | RAS-related C3 botulinum substrate 2                         | 63   | 67   | 65   |
| 170758 | Rac3     | RAS-related C3 botulinum substrate 3                         | 16   | 14   | 13   |
| 19355  | Rad1     | RAD1 homolog (S. pombe)                                      | 91   | 94   | 96   |
| 19356  | Rad17    | RAD17 homolog (S. pombe)                                     | 47   | 49   | 50   |
| 58186  | Rad18    | RAD18 homolog (S. cerevisiae)                                | 583  | 592  | 579  |
| 19357  | Rad21    | RAD21 homolog (S. pombe)                                     | 210  | 221  | 212  |
| 19358  | Rad23a   | RAD23a homolog (S. cerevisiae)                               | 21   | 16   | 16   |
| 19359  | Rad23b   | RAD23b homolog (S. cerevisiae)                               | 778  | 770  | 767  |
| 19360  | Rad50    | RAD50 homolog (S. cerevisiae)                                | 111  | 120  | 115  |
| 19361  | Rad51    | RAD51 homolog (S. cerevisiae)                                | 143  | 139  | 146  |
| 19362  | Rad51ap1 | RAD51 associated protein 1                                   | 27   | 23   | 23   |
| 114714 | Rad51c   | RAD51 homolog c (S. cerevisiae)                              | 62   | 62   | 58   |
| 19363  | Rad5111  | RAD51-like 1 (S. cerevisiae)                                 | 1055 | 1047 | 1040 |
| 19364  | Rad5113  | RAD51-like 3 (S. cerevisiae)                                 | 27   | 28   | 28   |
| 19365  | Rad52    | RAD52 homolog (S. cerevisiae)                                | 250  | 246  | 245  |
| 623474 | Rad54b   | RAD54 homolog B (S. cerevisiae)                              | 283  | 295  | 282  |
| 19366  | Rad54l   | RAD54 like (S. cerevisiae)                                   | 92   | 89   | 94   |
| 19367  | Rad9     | RAD9 homolog (S. pombe)                                      | 30   | 24   | 29   |
| 231724 | Rad9b    | RAD9 homolog B (S. cerevisiae)                               | 92   | 94   | 92   |
| 110157 | Raf1     | v-raf-leukemia viral oncogene 1                              | 181  | 171  | 171  |
| 19373  | Rag1     | recombination activating gene 1                              | 65   | 65   | 64   |
| 19374  | Rag2     | recombination activating gene 2                              | 5235 | 5279 | 5186 |
| 54351  | Rai12    | retinoic acid induced 12                                     | 34   | 35   | 33   |
| 56044  | Rala     | v-ral simian leukemia viral oncogene homolog A (ras related) | 246  | 242  | 234  |
| 64143  | Ralb     | v-ral simian leukemia viral oncogene homolog B (ras related) | 139  | 134  | 131  |
| 19765  | Ralbp1   | ralA binding protein 1                                       | 223  | 218  | 211  |
| 19384  | Ran      | RAN, member RAS oncogene family                              | 110  | 107  | 115  |
| 19386  | Ranbp2   | RAN binding protein 2                                        | 131  | 131  | 128  |
| 109905 | Rap1a    | RAS-related protein-1a                                       | 210  | 228  | 215  |
| 215449 | Rap1b    | RAS related protein 1b                                       | 449  | 447  | 456  |
| 76108  | Rap2a    | RAS related protein 2a                                       | 801  | 815  | 797  |
| 74012  | Rap2b    | RAP2B, member of RAS oncogene family                         | 1679 | 1729 | 1670 |
| 72065  | Rap2c    | RAP2C, member of RAS oncogene family                         | 325  | 319  | 317  |
| 19401  | Rara     | retinoic acid receptor, alpha                                | 113  | 118  | 103  |
| 218772 | Rarb     | retinoic acid receptor, beta                                 | 1695 | 1686 | 1622 |
| 19411  | Rarg     | retinoic acid receptor, gamma                                | 73   | 71   | 72   |
| 71660  | Rarres2  | retinoic acid receptor responder (tazarotene induced) 2      | 46   | 43   | 43   |

|        |         |                                                                    |      |      |      |
|--------|---------|--------------------------------------------------------------------|------|------|------|
| 104458 | Rars    | arginyl-tRNA synthetase                                            | 232  | 249  | 236  |
| 109093 | Rars2   | arginyl-tRNA synthetase 2, mitochondrial                           | 91   | 89   | 94   |
| 19416  | Rasd1   | RAS, dexamethasone-induced 1                                       | 105  | 113  | 112  |
| 75141  | Rasd2   | RASD family, member 2                                              | 431  | 434  | 417  |
| 75668  | Rasl10a | RAS-like, family 10, member A                                      | 92   | 94   | 98   |
| 276952 | Rasl10b | RAS-like, family 10, member B                                      | 166  | 160  | 163  |
| 68895  | Rasl11a | RAS-like, family 11, member A                                      | 151  | 149  | 153  |
| 68939  | Rasl11b | RAS-like, family 11, member B                                      | 576  | 559  | 579  |
| 70784  | Rasl12  | RAS-like, family 12                                                | 39   | 41   | 36   |
| 56289  | Rassf1  | Ras association (RalGDS/AF-6) domain family member 1               | 18   | 17   | 15   |
| 19434  | Rax     | retina and anterior neural fold homeobox                           | 123  | 128  | 125  |
| 19645  | Rb1     | retinoblastoma 1                                                   | 185  | 189  | 178  |
| 12421  | Rb1cc1  | RB1-inducible coiled-coil 1                                        | 555  | 579  | 562  |
| 57782  | Rbak    | RB-associated KRAB repressor                                       | 86   | 89   | 86   |
| 19646  | Rbbp4   | retinoblastoma binding protein 4                                   | 67   | 61   | 68   |
| 213464 | Rbbp5   | retinoblastoma binding protein 5                                   | 114  | 111  | 110  |
| 19647  | Rbbp6   | retinoblastoma binding protein 6                                   | 590  | 580  | 598  |
| 245688 | Rbbp7   | retinoblastoma binding protein 7                                   | 230  | 242  | 224  |
| 225182 | Rbbp8   | retinoblastoma binding protein 8                                   | 1195 | 1236 | 1199 |
| 24105  | Rbck1   | RanBP-type and C3HC4-type zinc finger containing 1                 | 63   | 61   | 64   |
| 68731  | Rbfa    | ribosome binding factor A                                          | 69   | 75   | 75   |
| 268859 | Rbfox1  | RNA binding protein, fox-1 homolog (C. elegans) 1                  | 5579 | 5627 | 5621 |
| 93686  | Rbfox2  | RNA binding protein, fox-1 homolog (C. elegans) 2                  | 647  | 635  | 651  |
| 52897  | Rbfox3  | RNA binding protein, fox-1 homolog (C. elegans) 3                  | 661  | 626  | 662  |
| 71336  | Rbks    | ribokinase                                                         | 111  | 107  | 111  |
| 19650  | Rbl1    | retinoblastoma-like 1 (p107)                                       | 180  | 186  | 181  |
| 19651  | Rbl2    | retinoblastoma-like 2                                              | 397  | 406  | 385  |
| 56275  | Rbm14   | RNA binding motif protein 14                                       | 60   | 57   | 58   |
| 229700 | Rbm15   | RNA binding motif protein 15                                       | 217  | 213  | 207  |
| 109095 | Rbm15b  | RNA binding motif protein 15B                                      | 85   | 82   | 80   |
| 76938  | Rbm17   | RNA binding motif protein 17                                       | 114  | 119  | 118  |
| 66810  | Rbm22   | RNA binding motif protein 22                                       | 89   | 90   | 88   |
| 666794 | Rbm24   | RNA binding motif protein 24                                       | 300  | 289  | 288  |
| 67039  | Rbm25   | RNA binding motif protein 25                                       | 126  | 121  | 117  |
| 74213  | Rbm26   | RNA binding motif protein 26                                       | 798  | 798  | 758  |
| 225432 | Rbm27   | RNA binding motif protein 27                                       | 150  | 157  | 153  |
| 68272  | Rbm28   | RNA binding motif protein 28                                       | 157  | 155  | 154  |
| 19652  | Rbm3    | RNA binding motif protein 3                                        | 41   | 44   | 37   |
| 56190  | Rbm38   | RNA binding motif protein 38                                       | 146  | 139  | 148  |
| 170791 | Rbm39   | RNA binding motif protein 39                                       | 67   | 68   | 62   |
| 19653  | Rbm4    | RNA binding motif protein 4                                        | 74   | 64   | 69   |
| 66704  | Rbm4b   | RNA binding motif protein 4B                                       | 112  | 102  | 104  |
| 83486  | Rbm5    | RNA binding motif protein 5                                        | 213  | 214  | 209  |
| 60365  | Rbm8a   | RNA binding motif protein 8a                                       | 7    | 8    | 5    |
| 56878  | Rbms1   | RNA binding motif, single stranded interacting protein 1           | 1200 | 1193 | 1192 |
| 19655  | Rbmx    | RNA binding motif protein, X chromosome                            | 20   | 20   | 17   |
| 19656  | Rbmxrt  | RNA binding motif protein, X chromosome retrogene                  | 94   | 92   | 94   |
| 19657  | Rbmy1a1 | RNA binding motif protein, Y chromosome, family 1, member A1       | 1571 | 1600 | 1554 |
| 19659  | Rbp1    | retinol binding protein 1, cellular                                | 242  | 243  | 241  |
| 19660  | Rbp2    | retinol binding protein 2, cellular                                | 184  | 183  | 188  |
| 19661  | Rbp3    | retinol binding protein 3, interstitial                            | 45   | 47   | 42   |
| 19662  | Rbp4    | retinol binding protein 4, plasma                                  | 47   | 43   | 40   |
| 19664  | Rbpj    | recombination signal binding protein for immunoglobulin kappa J re | 617  | 618  | 611  |
| 19668  | Rbpjl   | recombination signal binding protein for immunoglobulin kappa J re | 56   | 62   | 59   |
| 19663  | Rbpms   | RNA binding protein gene with multiple splicing                    | 434  | 418  | 428  |

|        |        |                                                                            |      |      |      |
|--------|--------|----------------------------------------------------------------------------|------|------|------|
| 56438  | Rbx1   | ring-box 1                                                                 | 244  | 241  | 243  |
| 381305 | Rc3h1  | RING CCCH (C3H) domains 1                                                  | 249  | 244  | 241  |
| 71330  | Rcbtb1 | regulator of chromosome condensation (RCC1) and BTB (POZ) dc               | 106  | 103  | 102  |
| 68098  | Rchy1  | ring finger and CHY zinc finger domain containing 1                        | 33   | 33   | 30   |
| 59028  | Rcl1   | RNA terminal phosphate cyclase-like 1                                      | 117  | 104  | 113  |
| 217864 | Rcor1  | REST corepressor 1                                                         | 251  | 250  | 245  |
| 104383 | Rcor2  | REST corepressor 2                                                         | 65   | 61   | 62   |
| 214742 | Rcor3  | REST corepressor 3                                                         | 52   | 46   | 44   |
| 27632  | Rdbp   | RD RNA-binding protein                                                     | 14   | 13   | 17   |
| 107605 | Rdh1   | retinol dehydrogenase 1 (all trans)                                        | 34   | 33   | 32   |
| 98711  | Rdh10  | retinol dehydrogenase 10 (all-trans)                                       | 530  | 546  | 499  |
| 17252  | Rdh11  | retinol dehydrogenase 11                                                   | 52   | 48   | 50   |
| 77974  | Rdh12  | retinol dehydrogenase 12                                                   | 142  | 137  | 138  |
| 108841 | Rdh13  | retinol dehydrogenase 13 (all-trans and 9-cis)                             | 84   | 94   | 85   |
| 105014 | Rdh14  | retinol dehydrogenase 14 (all-trans and 9-cis)                             | 993  | 992  | 961  |
| 19683  | Rdh16  | retinol dehydrogenase 16                                                   | 64   | 60   | 64   |
| 216453 | Rdh19  | retinol dehydrogenase 19                                                   | 57   | 53   | 51   |
| 19682  | Rdh5   | retinol dehydrogenase 5                                                    | 19   | 19   | 20   |
| 54150  | Rdh7   | retinol dehydrogenase 7                                                    | 44   | 43   | 42   |
| 235033 | Rdh8   | retinol dehydrogenase 8                                                    | 67   | 67   | 68   |
| 103142 | Rdh9   | retinol dehydrogenase 9                                                    | 54   | 55   | 52   |
| 19691  | Recql  | RecQ protein-like                                                          | 53   | 53   | 55   |
| 79456  | Recql4 | RecQ protein-like 4                                                        | 13   | 9    | 10   |
| 56009  | Refbp2 | RNA and export factor binding protein 2                                    | 125  | 129  | 127  |
| 19696  | Rel    | reticuloendotheliosis oncogene                                             | 295  | 301  | 289  |
| 19697  | Rela   | v-rel reticuloendotheliosis viral oncogene homolog A (avian)               | 65   | 68   | 70   |
| 19698  | Relb   | avian reticuloendotheliosis viral (v-rel) oncogene related B               | 75   | 73   | 74   |
| 19699  | Reln   | reelin                                                                     | 833  | 856  | 841  |
| 19700  | Rem1   | rad and gem related GTP binding protein 1                                  | 53   | 56   | 62   |
| 140743 | Rem2   | rad and gem related GTP binding protein 2                                  | 63   | 64   | 65   |
| 19701  | Ren1   | renin 1 structural                                                         | 19   | 18   | 20   |
| 19702  | Ren2   | renin 2 tandem duplication of Ren1                                         | 32   | 29   | 32   |
| 19703  | Renbp  | renin binding protein                                                      | 61   | 54   | 54   |
| 58887  | Repin1 | replication initiator 1                                                    | 27   | 21   | 26   |
| 68703  | Rere   | arginine glutamic acid dipeptide (RE) repeats                              | 531  | 539  | 548  |
| 232441 | Rerg   | RAS-like, estrogen-regulated, growth-inhibitor                             | 381  | 383  | 369  |
| 19712  | Rest   | RE1-silencing transcription factor                                         | 130  | 126  | 128  |
| 19713  | Ret    | ret proto-oncogene                                                         | 363  | 369  | 345  |
| 67442  | Retsat | retinol saturase (all trans retinol 13,14 reductase)                       | 26   | 25   | 26   |
| 56210  | Rev1   | REV1 homolog (S. cerevisiae)                                               | 857  | 865  | 873  |
| 19714  | Rev3l  | REV3-like, catalytic subunit of DNA polymerase zeta RAD54 like ( $\zeta$ ) | 204  | 208  | 212  |
| 104444 | Rexo2  | REX2, RNA exonuclease 2 homolog (S. cerevisiae)                            | 49   | 60   | 52   |
| 19687  | Rfc1   | replication factor C (activator 1) 1                                       | 186  | 186  | 187  |
| 19718  | Rfc2   | replication factor C (activator 1) 2                                       | 69   | 73   | 70   |
| 69263  | Rfc3   | replication factor C (activator 1) 3                                       | 309  | 307  | 301  |
| 106344 | Rfc4   | replication factor C (activator 1) 4                                       | 50   | 49   | 45   |
| 72151  | Rfc5   | replication factor C (activator 1) 5                                       | 76   | 69   | 71   |
| 218341 | Rfesd  | Rieske (Fe-S) domain containing                                            | 118  | 117  | 113  |
| 54391  | Rfk    | riboflavin kinase                                                          | 599  | 612  | 598  |
| 234736 | Rfwd3  | ring finger and WD repeat domain 3                                         | 112  | 110  | 104  |
| 19724  | Rfx1   | regulatory factor X, 1 (influences HLA class II expression)                | 55   | 44   | 48   |
| 19725  | Rfx2   | regulatory factor X, 2 (influences HLA class II expression)                | 131  | 133  | 132  |
| 19726  | Rfx3   | regulatory factor X, 3 (influences HLA class II expression)                | 1625 | 1626 | 1612 |
| 71137  | Rfx4   | regulatory factor X, 4 (influences HLA class II expression)                | 488  | 479  | 487  |
| 53970  | Rfx5   | regulatory factor X, 5 (influences HLA class II expression)                | 57   | 50   | 48   |

|        |          |                                                                   |      |      |      |
|--------|----------|-------------------------------------------------------------------|------|------|------|
| 320995 | Rfx6     | regulatory factor X, 6                                            | 496  | 509  | 491  |
| 619289 | Rfx8     | regulatory factor X 8                                             | 195  | 196  | 202  |
| 19727  | Rfxank   | regulatory factor X-associated ankyrin-containing protein         | 12   | 12   | 10   |
| 170767 | Rfxap    | regulatory factor X-associated protein                            | 211  | 204  | 209  |
| 52575  | Rg9mtd1  | RNA (guanine-9-) methyltransferase domain containing 1            | 59   | 61   | 58   |
| 108943 | Rg9mtd2  | RNA (guanine-9-) methyltransferase domain containing 2            | 56   | 50   | 54   |
| 69934  | Rg9mtd3  | RNA (guanine-9-) methyltransferase domain containing 3            | 182  | 179  | 177  |
| 244058 | Rgma     | RGM domain family, member A                                       | 1572 | 1596 | 1557 |
| 68799  | Rgmb     | RGM domain family, member B                                       | 1731 | 1710 | 1689 |
| 19733  | Rgn      | regucalcin                                                        | 202  | 199  | 196  |
| 57811  | Rgr      | retinal G protein coupled receptor                                | 114  | 119  | 112  |
| 76867  | Rhbdd1   | rhomboid domain containing 1                                      | 407  | 406  | 396  |
| 13650  | Rhbdf1   | rhomboid family 1 (Drosophila)                                    | 21   | 21   | 22   |
| 217344 | Rhbdf2   | rhomboid 5 homolog 2 (Drosophila)                                 | 78   | 81   | 75   |
| 214951 | Rhbdl1   | rhomboid, veinlet-like 1 (Drosophila)                             | 14   | 12   | 13   |
| 230726 | Rhbdl2   | rhomboid, veinlet-like 2 (Drosophila)                             | 209  | 202  | 197  |
| 246104 | Rhbdl3   | rhomboid, veinlet-like 3 (Drosophila)                             | 217  | 209  | 218  |
| 19744  | Rheb     | Ras homolog enriched in brain                                     | 196  | 190  | 184  |
| 69159  | Rhebl1   | Ras homolog enriched in brain like 1                              | 34   | 34   | 36   |
| 212541 | Rho      | rhodopsin                                                         | 125  | 117  | 116  |
| 11848  | Rhoa     | ras homolog gene family, member A                                 | 42   | 42   | 42   |
| 73296  | Rhobtb3  | Rho-related BTB domain containing 3                               | 162  | 162  | 164  |
| 56212  | Rhog     | ras homolog gene family, member G                                 | 53   | 52   | 53   |
| 74734  | Rhoh     | ras homolog gene family, member H                                 | 277  | 258  | 272  |
| 80837  | Rhoj     | ras homolog gene family, member J                                 | 303  | 308  | 303  |
| 104215 | Rhoq     | ras homolog gene family, member Q                                 | 96   | 103  | 100  |
| 59040  | Rhot1    | ras homolog gene family, member T1                                | 160  | 156  | 145  |
| 214952 | Rhot2    | ras homolog gene family, member T2                                | 30   | 26   | 29   |
| 69581  | Rhou     | ras homolog gene family, member U                                 | 336  | 334  | 333  |
| 75199  | Rhox2a   | reproductive homeobox 2A                                          | 6    | 6    | 5    |
| 382209 | Rhox3a   | reproductive homeobox 3A                                          | 14   | 12   | 12   |
| 78757  | Rictor   | RPTOR independent companion of MTOR, complex 2                    | 374  | 383  | 360  |
| 194237 | Rimkla   | ribosomal modification protein rimK-like family member A          | 145  | 142  | 153  |
| 108653 | Rimklb   | ribosomal modification protein rimK-like family member B          | 229  | 226  | 214  |
| 19763  | Ring1    | ring finger protein 1                                             | 34   | 29   | 31   |
| 71340  | Riok1    | RIO kinase 1 (yeast)                                              | 146  | 149  | 144  |
| 67045  | Riok2    | RIO kinase 2 (yeast)                                              | 364  | 372  | 355  |
| 66878  | Riok3    | RIO kinase 3 (yeast)                                              | 57   | 60   | 60   |
| 19766  | Ripk1    | receptor (TNFRSF)-interacting serine-threonine kinase 1           | 42   | 41   | 44   |
| 192656 | Ripk2    | receptor (TNFRSF)-interacting serine-threonine kinase 2           | 2294 | 2339 | 2293 |
| 56532  | Ripk3    | receptor-interacting serine-threonine kinase 3                    | 47   | 55   | 51   |
| 72388  | Ripk4    | receptor-interacting serine-threonine kinase 4                    | 316  | 322  | 318  |
| 622473 | Ripply1  | rippy1 homolog (zebrafish)                                        | 145  | 140  | 137  |
| 170765 | Ripply3  | rippy3 homolog (zebrafish)                                        | 114  | 112  | 106  |
| 19769  | Rit1     | Ras-like without CAAX 1                                           | 116  | 112  | 115  |
| 19762  | Rit2     | Ras-like without CAAX 2                                           | 1478 | 1494 | 1436 |
| 109263 | Rlf      | rearranged L-myc fusion sequence                                  | 278  | 282  | 274  |
| 19820  | Rlim     | ring finger protein, LIM domain interacting                       | 362  | 361  | 365  |
| 74386  | Rmi1     | RMI1, RecQ mediated genome instability 1, homolog (S. cerevisiae) | 276  | 273  | 272  |
| 19819  | Rnaseh1  | ribonuclease H1                                                   | 49   | 50   | 59   |
| 69724  | Rnaseh2a | ribonuclease H2, large subunit                                    | 31   | 30   | 32   |
| 67153  | Rnaseh2b | ribonuclease H2, subunit B                                        | 203  | 216  | 209  |
| 68209  | Rnaseh2c | ribonuclease H2, subunit C                                        | 55   | 50   | 52   |
| 52898  | Rnasek   | ribonuclease, RNase K                                             | 26   | 21   | 24   |
| 24014  | Rnasel   | ribonuclease L (2', 5'-oligoadenylate synthetase-dependent)       | 131  | 142  | 145  |

|        |         |                                                        |      |      |      |
|--------|---------|--------------------------------------------------------|------|------|------|
| 50849  | Rnf10   | ring finger protein 10                                 | 58   | 53   | 56   |
| 22644  | Rnf103  | ring finger protein 103                                | 125  | 126  | 125  |
| 29864  | Rnf11   | ring finger protein 11                                 | 154  | 147  | 146  |
| 93836  | Rnf111  | ring finger 111                                        | 168  | 165  | 155  |
| 67845  | Rnf115  | ring finger protein 115                                | 101  | 112  | 110  |
| 66889  | Rnf128  | ring finger protein 128                                | 251  | 242  | 232  |
| 24017  | Rnf13   | ring finger protein 13                                 | 187  | 186  | 196  |
| 59044  | Rnf130  | ring finger protein 130                                | 215  | 213  | 205  |
| 386611 | Rnf133  | ring finger protein 133                                | 506  | 511  | 516  |
| 71956  | Rnf135  | ring finger protein 135                                | 78   | 66   | 69   |
| 75841  | Rnf139  | ring finger protein 139                                | 71   | 82   | 77   |
| 56736  | Rnf14   | ring finger protein 14                                 | 67   | 70   | 66   |
| 218215 | Rnf144b | ring finger protein 144B                               | 1254 | 1263 | 1256 |
| 68031  | Rnf146  | ring finger protein 146                                | 295  | 292  | 289  |
| 67504  | Rnf151  | ring finger protein 151                                | 13   | 16   | 15   |
| 320311 | Rnf152  | ring finger protein 152                                | 1166 | 1154 | 1143 |
| 70510  | Rnf167  | ring finger protein 167                                | 11   | 9    | 10   |
| 70238  | Rnf168  | ring finger protein 168                                | 78   | 80   | 79   |
| 71816  | Rnf180  | ring finger protein 180                                | 464  | 469  | 467  |
| 328234 | Rnf182  | ring finger protein 182                                | 287  | 294  | 295  |
| 108660 | Rnf187  | ring finger protein 187                                | 39   | 38   | 39   |
| 19821  | Rnf2    | ring finger protein 2                                  | 192  | 190  | 191  |
| 109331 | Rnf20   | ring finger protein 20                                 | 114  | 114  | 109  |
| 108086 | Rnf216  | ring finger protein 216                                | 287  | 293  | 299  |
| 66743  | Rnf220  | ring finger protein 220                                | 379  | 375  | 391  |
| 57751  | Rnf25   | ring finger protein 25                                 | 22   | 15   | 19   |
| 268749 | Rnf31   | ring finger protein 31                                 | 16   | 14   | 14   |
| 80751  | Rnf34   | ring finger protein 34                                 | 100  | 104  | 102  |
| 19822  | Rnf4    | ring finger protein 4                                  | 175  | 174  | 170  |
| 233900 | Rnf40   | ring finger protein 40                                 | 21   | 19   | 22   |
| 67588  | Rnf41   | ring finger protein 41                                 | 63   | 60   | 65   |
| 54197  | Rnf5    | ring finger protein 5                                  | 8    | 10   | 7    |
| 74132  | Rnf6    | ring finger protein (C3H2C3 type) 6                    | 58   | 59   | 61   |
| 19823  | Rnf7    | ring finger protein 7                                  | 344  | 341  | 348  |
| 58230  | Rnf8    | ring finger protein 8                                  | 140  | 140  | 150  |
| 24018  | Rngtt   | RNA guanylyltransferase and 5'-phosphatase             | 879  | 869  | 860  |
| 67795  | Rnls    | renalase, FAD-dependent amine oxidase                  | 1064 | 1078 | 1039 |
| 67897  | Rnmt    | RNA (guanine-7-) methyltransferase                     | 46   | 48   | 51   |
| 67390  | Rnmtl1  | RNA methyltransferase like 1                           | 204  | 215  | 208  |
| 215615 | Rnpep   | arginyl aminopeptidase (aminopeptidase B)              | 74   | 73   | 74   |
| 19826  | Rnps1   | ribonucleic acid binding protein S1                    | 17   | 13   | 13   |
| 19866  | Rnu7    | U7 small nuclear RNA                                   | 19   | 17   | 13   |
| 19877  | Rock1   | Rho-associated coiled-coil containing protein kinase 1 | 377  | 386  | 378  |
| 19878  | Rock2   | Rho-associated coiled-coil containing protein kinase 2 | 244  | 235  | 249  |
| 230257 | Rod1    | ROD1 regulator of differentiation 1 (S. pombe)         | 197  | 182  | 183  |
| 26563  | Ror1    | receptor tyrosine kinase-like orphan receptor 1        | 715  | 717  | 682  |
| 26564  | Ror2    | receptor tyrosine kinase-like orphan receptor 2        | 508  | 501  | 515  |
| 19883  | Rora    | RAR-related orphan receptor alpha                      | 1187 | 1210 | 1174 |
| 225998 | Rorb    | RAR-related orphan receptor beta                       | 2213 | 2255 | 2183 |
| 19885  | Rorc    | RAR-related orphan receptor gamma                      | 46   | 43   | 48   |
| 19886  | Ros1    | Ros1 proto-oncogene                                    | 278  | 266  | 263  |
| 19889  | Rp2h    | retinitis pigmentosa 2 homolog (human)                 | 198  | 208  | 198  |
| 68275  | Rpa1    | replication protein A1                                 | 206  | 201  | 196  |
| 68240  | Rpa3    | replication protein A3                                 | 64   | 58   | 66   |
| 69723  | Rpain   | RPA interacting protein                                | 17   | 18   | 18   |

|           |         |                                                      |      |      |      |
|-----------|---------|------------------------------------------------------|------|------|------|
| 68925     | Rpap1   | RNA polymerase II associated protein 1               | 51   | 53   | 52   |
| 66646     | Rpe     | ribulose-5-phosphate-3-epimerase                     | 448  | 445  | 446  |
| 19892     | Rpe65   | retinal pigment epithelium 65                        | 433  | 441  | 428  |
| 70285     | Rpf1    | ribosome production factor 1 homolog (S. cerevisiae) | 128  | 130  | 123  |
| 19895     | Rpia    | ribose 5-phosphate isomerase A                       | 1905 | 1953 | 1940 |
| 110954    | Rpl10   | ribosomal protein 10                                 | 26   | 26   | 22   |
| 238217    | Rpl10l  | ribosomal protein L10-like                           | 2481 | 2506 | 2457 |
| 67025     | Rpl11   | ribosomal protein L11                                | 162  | 155  | 154  |
| 67115     | Rpl14   | ribosomal protein L14                                | 521  | 510  | 509  |
| 66480     | Rpl15   | ribosomal protein L15                                | 42   | 41   | 46   |
| 19899     | Rpl18   | ribosomal protein L18                                | 4    | 3    | 3    |
| 76808     | Rpl18a  | ribosomal protein L18A                               | 10   | 13   | 12   |
| 19921     | Rpl19   | ribosomal protein L19                                | 38   | 37   | 40   |
| 19934     | Rpl22   | ribosomal protein L22                                | 25   | 23   | 23   |
| 68028     | Rpl22l1 | ribosomal protein L22 like 1                         | 139  | 133  | 139  |
| 65019     | Rpl23   | ribosomal protein L23                                | 24   | 22   | 23   |
| 68193     | Rpl24   | ribosomal protein L24                                | 52   | 51   | 52   |
| 19941     | Rpl26   | ribosomal protein L26                                | 21   | 21   | 18   |
| 26451     | Rpl27a  | ribosomal protein L27A                               | 12   | 15   | 15   |
| 19943     | Rpl28   | ribosomal protein L28                                | 29   | 31   | 30   |
| 19944     | Rpl29   | ribosomal protein L29                                | 93   | 83   | 87   |
| 27367     | Rpl3    | ribosomal protein L3                                 | 14   | 11   | 12   |
| 19951     | Rpl32   | ribosomal protein L32                                | 39   | 41   | 41   |
| 57808     | Rpl35a  | ribosomal protein L35A                               | 9    | 9    | 9    |
| 67671     | Rpl38   | ribosomal protein L38                                | 293  | 296  | 295  |
| 67891     | Rpl4    | ribosomal protein L4                                 | 2    | 4    | 4    |
| 100503670 | Rpl5    | ribosomal protein L5                                 | 149  | 149  | 148  |
| 19988     | Rpl6    | ribosomal protein L6                                 | 259  | 244  | 259  |
| 19989     | Rpl7    | ribosomal protein L7                                 | 261  | 271  | 278  |
| 66229     | Rpl7l1  | ribosomal protein L7-like 1                          | 81   | 71   | 78   |
| 26961     | Rpl8    | ribosomal protein L8                                 | 35   | 32   | 31   |
| 20005     | Rpl9    | ribosomal protein L9                                 | 60   | 54   | 56   |
| 11837     | Rplp0   | ribosomal protein, large, P0                         | 76   | 65   | 69   |
| 56040     | Rplp1   | ribosomal protein, large, P1                         | 757  | 748  | 744  |
| 67186     | Rplp2   | ribosomal protein, large P2                          | 5    | 8    | 6    |
| 103963    | Rpn1    | ribophorin I                                         | 240  | 235  | 241  |
| 20014     | Rpn2    | ribophorin II                                        | 98   | 89   | 100  |
| 67053     | Rpp14   | ribonuclease P 14 subunit (human)                    | 125  | 125  | 122  |
| 67676     | Rpp21   | ribonuclease P 21 subunit (human)                    | 108  | 99   | 106  |
| 102614    | Rpp25   | ribonuclease P 25 subunit (human)                    | 74   | 67   | 63   |
| 54364     | Rpp30   | ribonuclease P/MRP 30 subunit (human)                | 85   | 80   | 85   |
| 208366    | Rpp40   | ribonuclease P 40 subunit (human)                    | 290  | 304  | 293  |
| 27207     | Rps11   | ribosomal protein S11                                | 4    | 3    | 3    |
| 68052     | Rps13   | ribosomal protein S13                                | 339  | 336  | 332  |
| 20044     | Rps14   | ribosomal protein S14                                | 113  | 116  | 110  |
| 20054     | Rps15   | ribosomal protein S15                                | 45   | 42   | 45   |
| 267019    | Rps15a  | ribosomal protein S15A                               | 968  | 975  | 979  |
| 20055     | Rps16   | ribosomal protein S16                                | 15   | 14   | 16   |
| 20068     | Rps17   | ribosomal protein S17                                | 317  | 313  | 309  |
| 20084     | Rps18   | ribosomal protein S18                                | 5    | 5    | 3    |
| 20085     | Rps19   | ribosomal protein S19                                | 33   | 37   | 31   |
| 67427     | Rps20   | ribosomal protein S20                                | 199  | 205  | 200  |
| 66481     | Rps21   | ribosomal protein S21                                | 41   | 43   | 41   |
| 20088     | Rps24   | ribosomal protein S24                                | 1104 | 1128 | 1107 |
| 27370     | Rps26   | ribosomal protein S26                                | 80   | 75   | 75   |

|        |         |                                                                            |      |      |      |
|--------|---------|----------------------------------------------------------------------------|------|------|------|
| 67941  | Rps27l  | ribosomal protein S27-like                                                 | 73   | 73   | 70   |
| 54127  | Rps28   | ribosomal protein S28                                                      | 13   | 16   | 16   |
| 20090  | Rps29   | ribosomal protein S29                                                      | 1928 | 1887 | 1907 |
| 27050  | Rps3    | ribosomal protein S3                                                       | 69   | 67   | 65   |
| 20091  | Rps3a   | ribosomal protein S3A                                                      | 114  | 108  | 105  |
| 20102  | Rps4x   | ribosomal protein S4, X-linked                                             | 113  | 118  | 112  |
| 20103  | Rps5    | ribosomal protein S5                                                       | 39   | 37   | 40   |
| 20104  | Rps6    | ribosomal protein S6                                                       | 166  | 160  | 165  |
| 20111  | Rps6ka1 | ribosomal protein S6 kinase polypeptide 1                                  | 284  | 283  | 283  |
| 20112  | Rps6ka2 | ribosomal protein S6 kinase, polypeptide 2                                 | 388  | 382  | 388  |
| 110651 | Rps6ka3 | ribosomal protein S6 kinase polypeptide 3                                  | 1574 | 1625 | 1592 |
| 56613  | Rps6ka4 | ribosomal protein S6 kinase, polypeptide 4                                 | 82   | 89   | 97   |
| 73086  | Rps6ka5 | ribosomal protein S6 kinase, polypeptide 5                                 | 322  | 335  | 319  |
| 67071  | Rps6ka6 | ribosomal protein S6 kinase polypeptide 6                                  | 550  | 575  | 536  |
| 72508  | Rps6kb1 | ribosomal protein S6 kinase, polypeptide 1                                 | 77   | 86   | 73   |
| 58988  | Rps6kb2 | ribosomal protein S6 kinase, polypeptide 2                                 | 26   | 26   | 28   |
| 320119 | Rps6kc1 | ribosomal protein S6 kinase polypeptide 1                                  | 961  | 963  | 970  |
| 238323 | Rps6kl1 | ribosomal protein S6 kinase-like 1                                         | 83   | 88   | 83   |
| 20115  | Rps7    | ribosomal protein S7                                                       | 37   | 32   | 32   |
| 20116  | Rps8    | ribosomal protein S8                                                       | 35   | 35   | 33   |
| 76846  | Rps9    | ribosomal protein S9                                                       | 34   | 33   | 34   |
| 16785  | Rpsa    | ribosomal protein SA                                                       | 26   | 24   | 25   |
| 74370  | Rptor   | regulatory associated protein of MTOR, complex 1                           | 458  | 469  | 462  |
| 106707 | Rpusd1  | RNA pseudouridylate synthase domain containing 1                           | 12   | 10   | 9    |
| 271842 | Rpusd2  | RNA pseudouridylate synthase domain containing 2                           | 23   | 24   | 24   |
| 101122 | Rpusd3  | RNA pseudouridylate synthase domain containing 3                           | 52   | 55   | 54   |
| 71989  | Rpusd4  | RNA pseudouridylate synthase domain containing 4                           | 243  | 238  | 227  |
| 58184  | Rqcd1   | rcd1 (required for cell differentiation) homolog 1 (S. pombe)              | 177  | 183  | 171  |
| 54170  | Rragc   | Ras-related GTP binding C                                                  | 985  | 980  | 968  |
| 20130  | Rras    | Harvey rat sarcoma oncogene, subgroup R                                    | 51   | 44   | 41   |
| 66922  | Rras2   | related RAS viral (r-ras) oncogene homolog 2                               | 640  | 639  | 631  |
| 68750  | Rreb1   | ras responsive element binding protein 1                                   | 935  | 938  | 921  |
| 20132  | Rrh     | retinal pigment epithelium derived rhodopsin homolog                       | 36   | 33   | 37   |
| 20133  | Rrm1    | ribonucleotide reductase M1                                                | 272  | 270  | 271  |
| 20135  | Rrm2    | ribonucleotide reductase M2                                                | 200  | 196  | 202  |
| 382985 | Rrm2b   | ribonucleotide reductase M2 B (TP53 inducible)                             | 360  | 391  | 356  |
| 106298 | Rrn3    | RRN3 RNA polymerase I transcription factor homolog (yeast)                 | 114  | 115  | 114  |
| 18114  | Rrp1    | ribosomal RNA processing 1 homolog (S. cerevisiae)                         | 92   | 87   | 94   |
| 72462  | Rrp1b   | ribosomal RNA processing 1 homolog B (S. cerevisiae)                       | 86   | 83   | 85   |
| 224823 | Rrp36   | ribosomal RNA processing 36 homolog (S. cerevisiae)                        | 40   | 37   | 42   |
| 101867 | Rrp8    | ribosomal RNA processing 8, methyltransferase, homolog (yeast)             | 138  | 128  | 137  |
| 27966  | Rrp9    | RRP9, small subunit (SSU) processome component, homolog (yeast)            | 30   | 28   | 28   |
| 237926 | Rsad1   | radical S-adenosyl methionine domain containing 1                          | 55   | 53   | 53   |
| 69994  | Rsc1a1  | regulatory solute carrier protein, family 1, member 1                      | 82   | 75   | 73   |
| 233532 | Rsf1    | remodeling and spacing factor 1                                            | 146  | 152  | 152  |
| 380855 | Rsl1    | regulator of sex limited protein 1                                         | 90   | 87   | 87   |
| 66880  | Rsrc1   | arginine/serine-rich coiled-coil 1                                         | 481  | 485  | 480  |
| 66368  | Rtcd1   | RNA terminal phosphate cyclase domain 1                                    | 113  | 116  | 110  |
| 269400 | Rtel1   | regulator of telomere elongation helicase 1                                | 66   | 68   | 66   |
| 76246  | Rtf1    | Rtf1, Paf1/RNA polymerase II complex component, homolog (S. cerevisiae)    | 104  | 101  | 104  |
| 170728 | Rtn4ip1 | reticulum 4 interacting protein 1                                          | 130  | 135  | 140  |
| 12394  | Runx1   | runt related transcription factor 1                                        | 1287 | 1312 | 1313 |
| 12395  | Runx1t1 | runt-related transcription factor 1; translocated to, 1 (cyclin D-related) | 2261 | 2260 | 2223 |
| 12393  | Runx2   | runt related transcription factor 2                                        | 1583 | 1589 | 1579 |
| 12399  | Runx3   | runt related transcription factor 3                                        | 424  | 435  | 433  |

|        |         |                                                                              |      |      |      |
|--------|---------|------------------------------------------------------------------------------|------|------|------|
| 56505  | Ruvbl1  | RuvB-like protein 1                                                          | 95   | 92   | 95   |
| 20174  | Ruvbl2  | RuvB-like protein 2                                                          | 17   | 17   | 16   |
| 140498 | Rxfp2   | relaxin/insulin-like family peptide receptor 2                               | 741  | 747  | 753  |
| 20181  | Rxra    | retinoid X receptor alpha                                                    | 459  | 453  | 459  |
| 20182  | Rxb     | retinoid X receptor beta                                                     | 6    | 8    | 8    |
| 20183  | Rxrg    | retinoid X receptor gamma                                                    | 304  | 308  | 302  |
| 56353  | Rybp    | RING1 and YY1 binding protein                                                | 1241 | 1251 | 1211 |
| 20187  | Ryk     | receptor-like tyrosine kinase                                                | 345  | 348  | 358  |
| 20193  | S100a1  | S100 calcium binding protein A1                                              | 6    | 8    | 6    |
| 20203  | S100b   | S100 protein, beta polypeptide, neural                                       | 133  | 136  | 146  |
| 13609  | S1pr1   | sphingosine-1-phosphate receptor 1                                           | 1031 | 1058 | 1029 |
| 13610  | S1pr3   | sphingosine-1-phosphate receptor 3                                           | 496  | 519  | 510  |
| 20208  | Saa1    | serum amyloid A 1                                                            | 23   | 27   | 25   |
| 83493  | Sacm1l  | SAC1 (suppressor of actin mutations 1, homolog)-like ( <i>S. cerevisia</i> ) | 195  | 204  | 186  |
| 56459  | Sae1    | SUMO1 activating enzyme subunit 1                                            | 130  | 120  | 122  |
| 224903 | Safb    | scaffold attachment factor B                                                 | 30   | 31   | 31   |
| 224902 | Safb2   | scaffold attachment factor B2                                                | 86   | 85   | 91   |
| 58198  | Sall1   | sal-like 1 ( <i>Drosophila</i> )                                             | 2163 | 2155 | 2110 |
| 50524  | Sall2   | sal-like 2 ( <i>Drosophila</i> )                                             | 66   | 59   | 62   |
| 20689  | Sall3   | sal-like 3 ( <i>Drosophila</i> )                                             | 1868 | 1856 | 1865 |
| 99377  | Sall4   | sal-like 4 ( <i>Drosophila</i> )                                             | 275  | 280  | 277  |
| 74480  | Samd4   | sterile alpha motif domain containing 4                                      | 604  | 601  | 603  |
| 67630  | Samd8   | sterile alpha motif domain containing 8                                      | 102  | 111  | 99   |
| 67742  | Samsn1  | SAM domain, SH3 domain and nuclear localization signals, 1                   | 776  | 781  | 755  |
| 269003 | Sap130  | Sin3A associated protein                                                     | 192  | 191  | 184  |
| 751865 | Sap25   | sin3 associated polypeptide                                                  | 21   | 22   | 21   |
| 60406  | Sap30   | sin3 associated polypeptide                                                  | 64   | 62   | 71   |
| 57230  | Sap30bp | SAP30 binding protein                                                        | 50   | 53   | 62   |
| 50724  | Sap30l  | SAP30-like                                                                   | 233  | 233  | 238  |
| 192166 | Sardh   | sarcosine dehydrogenase                                                      | 337  | 331  | 333  |
| 66118  | Sarnp   | SAP domain containing ribonucleoprotein                                      | 96   | 89   | 94   |
| 20226  | Sars    | seryl-aminoacyl-tRNA synthetase                                              | 162  | 156  | 151  |
| 71984  | Sars2   | seryl-aminoacyl-tRNA synthetase 2                                            | 21   | 14   | 20   |
| 20227  | Sart1   | squamous cell carcinoma antigen recognized by T-cells 1                      | 24   | 21   | 25   |
| 53890  | Sart3   | squamous cell carcinoma antigen recognized by T-cells 3                      | 43   | 51   | 46   |
| 20229  | Sat1    | spermidine/spermine N1-acetyl transferase 1                                  | 139  | 143  | 135  |
| 69215  | Sat2    | spermidine/spermine N1-acetyl transferase 2                                  | 20   | 22   | 17   |
| 20230  | Satb1   | special AT-rich sequence binding protein 1                                   | 1858 | 1864 | 1837 |
| 212712 | Satb2   | special AT-rich sequence binding protein 2                                   | 430  | 425  | 433  |
| 66711  | Sbds    | Shwachman-Bodian-Diamond syndrome homolog (human)                            | 45   | 40   | 44   |
| 77980  | Sbf1    | SET binding factor 1                                                         | 137  | 136  | 137  |
| 104175 | Sbk1    | SH3-binding kinase 1                                                         | 203  | 212  | 219  |
| 381836 | Sbk2    | SH3-binding domain kinase family, member 2                                   | 56   | 62   | 51   |
| 216161 | Sbno2   | strawberry notch homolog 2 ( <i>Drosophila</i> )                             | 83   | 73   | 75   |
| 66234  | Sc4mol  | sterol-C4-methyl oxidase-like                                                | 228  | 231  | 228  |
| 235293 | Sc5d    | sterol-C5-desaturase (fungal ERG3, delta-5-desaturase) homolog (             | 341  | 354  | 343  |
| 233208 | Scaf1   | SR-related CTD-associated factor 1                                           | 23   | 24   | 22   |
| 72193  | Scaf11  | SR-related CTD-associated factor 11                                          | 443  | 455  | 456  |
| 106583 | Scaf8   | SR-related CTD-associated factor 8                                           | 311  | 307  | 305  |
| 320271 | Scai    | suppressor of cancer cell invasion                                           | 77   | 85   | 86   |
| 235623 | Scap    | SREBF chaperone                                                              | 136  | 141  | 127  |
| 20778  | Scarb1  | scavenger receptor class B, member 1                                         | 272  | 278  | 266  |
| 109232 | Sccpdh  | saccharopine dehydrogenase (putative)                                        | 319  | 331  | 323  |
| 20249  | Scd1    | stearoyl-Coenzyme A desaturase 1                                             | 206  | 213  | 214  |
| 20250  | Scd2    | stearoyl-Coenzyme A desaturase 2                                             | 174  | 167  | 161  |

|           |         |                                                                 |      |      |      |
|-----------|---------|-----------------------------------------------------------------|------|------|------|
| 30049     | Scd3    | stearoyl-coenzyme A desaturase 3                                | 132  | 133  | 134  |
| 329065    | Scd4    | stearoyl-coenzyme A desaturase 4                                | 153  | 149  | 150  |
| 20394     | Scg5    | secretogranin V                                                 | 118  | 119  | 116  |
| 22287     | Scgb1a1 | secretoglobin, family 1A, member 1 (uteroglobin)                | 198  | 197  | 197  |
| 30953     | Schip1  | schwannomin interacting protein 1                               | 1685 | 1701 | 1650 |
| 50880     | Scly    | selenocysteine lyase                                            | 89   | 89   | 92   |
| 29871     | Scmh1   | sex comb on midleg homolog 1                                    | 315  | 321  | 315  |
| 268297    | Scml4   | sex comb on midleg-like 4 (Drosophila)                          | 538  | 537  | 516  |
| 100126824 | Sco2    | SCO cytochrome oxidase deficient homolog 2 (yeast)              | 25   | 27   | 30   |
| 20280     | Scp2    | sterol carrier protein 2, liver                                 | 185  | 170  | 166  |
| 74617     | Scpep1  | serine carboxypeptidase 1                                       | 131  | 126  | 129  |
| 105782    | Scrib   | scribbled homolog (Drosophila)                                  | 85   | 76   | 75   |
| 69938     | Scrn1   | secernin 1                                                      | 176  | 190  | 188  |
| 217140    | Scrn2   | secernin 2                                                      | 38   | 30   | 42   |
| 74616     | Scrn3   | secernin 3                                                      | 100  | 93   | 95   |
| 170729    | Scrt1   | scratch homolog 1, zinc finger protein (Drosophila)             | 22   | 24   | 27   |
| 545474    | Scrt2   | scratch homolog 2, zinc finger protein (Drosophila)             | 127  | 129  | 129  |
| 20289     | Scx     | scleraxis                                                       | 102  | 103  | 105  |
| 78891     | Scyl1   | SCY1-like 1 (S. cerevisiae)                                     | 77   | 80   | 77   |
| 213326    | Scyl2   | SCY1-like 2 (S. cerevisiae)                                     | 143  | 143  | 133  |
| 240880    | Scyl3   | SCY1-like 3 (S. cerevisiae)                                     | 266  | 276  | 269  |
| 66945     | Sdha    | succinate dehydrogenase complex, subunit A, flavoprotein (Fp)   | 45   | 40   | 42   |
| 66072     | Sdhaf2  | succinate dehydrogenase complex assembly factor 2               | 60   | 58   | 55   |
| 67680     | Sdhb    | succinate dehydrogenase complex, subunit B, iron sulfur (Ip)    | 105  | 104  | 98   |
| 66052     | Sdhc    | succinate dehydrogenase complex, subunit C, integral membrane p | 40   | 38   | 41   |
| 66925     | Sdhd    | succinate dehydrogenase complex, subunit D, integral membrane p | 56   | 49   | 52   |
| 20324     | Sdpr    | serum deprivation response                                      | 708  | 710  | 702  |
| 242285    | Sdr16c5 | short chain dehydrogenase/reductase family 16C, member 5        | 176  | 172  | 173  |
| 242286    | Sdr16c6 | short chain dehydrogenase/reductase family 16C, member 6        | 153  | 154  | 151  |
| 654795    | Sdr39u1 | short chain dehydrogenase/reductase family 39U, member 1        | 83   | 77   | 77   |
| 74032     | Sdr42e1 | short chain dehydrogenase/reductase family 42E, member 1        | 262  | 254  | 260  |
| 70061     | Sdr9c7  | 4short chain dehydrogenase/reductase family 9C, member 7        | 152  | 153  | 153  |
| 231691    | Sds     | serine dehydratase                                              | 37   | 39   | 36   |
| 257635    | Sdsl    | serine dehydratase-like                                         | 53   | 54   | 51   |
| 18292     | Sebox   | SEBOX homeobox                                                  | 16   | 17   | 19   |
| 56546     | Sec1    | secretory blood group 1                                         | 25   | 26   | 24   |
| 56529     | Sec11a  | SEC11 homolog A (S. cerevisiae)                                 | 112  | 114  | 110  |
| 66286     | Sec11c  | SEC11 homolog C (S. cerevisiae)                                 | 230  | 231  | 237  |
| 67815     | Sec14l2 | SEC14-like 2 (S. cerevisiae)                                    | 55   | 47   | 53   |
| 227648    | Sec16a  | SEC16 homolog A (S. cerevisiae)                                 | 117  | 113  | 114  |
| 66212     | Sec61b  | Sec61 beta subunit                                              | 744  | 739  | 731  |
| 140740    | Sec63   | SEC63-like (S. cerevisiae)                                      | 239  | 226  | 230  |
| 20339     | Sele    | selectin, endothelial cell                                      | 84   | 82   | 88   |
| 223870    | Senp1   | SUMO1/sentrin specific peptidase 1                              | 20   | 21   | 19   |
| 75826     | Senp2   | SUMO/sentrin specific peptidase 2                               | 223  | 215  | 206  |
| 80886     | Senp3   | SUMO/sentrin specific peptidase 3                               | 16   | 12   | 16   |
| 320213    | Senp5   | SUMO/sentrin specific peptidase 5                               | 174  | 176  | 170  |
| 215351    | Senp6   | SUMO/sentrin specific peptidase 6                               | 237  | 246  | 233  |
| 66315     | Senp7   | SUMO1/sentrin specific peptidase 7                              | 214  | 217  | 205  |
| 71599     | Senp8   | SUMO/sentrin specific peptidase 8                               | 60   | 58   | 56   |
| 109079    | Sephs1  | selenophosphate synthetase 1                                    | 255  | 261  | 264  |
| 20768     | Sephs2  | selenophosphate synthetase 2                                    | 44   | 47   | 47   |
| 20363     | Sepp1   | selenoprotein P, plasma, 1                                      | 617  | 607  | 609  |
| 211006    | Sepsecs | Sep (O-phosphoserine) tRNA:Sec (selenocysteine) tRNA synthase   | 218  | 223  | 218  |
| 20364     | Sepw1   | selenoprotein W, muscle 1                                       | 48   | 44   | 46   |

|        |           |                                                                        |     |     |     |
|--------|-----------|------------------------------------------------------------------------|-----|-----|-----|
| 27361  | Sepx1     | selenoprotein X 1                                                      | 26  | 25  | 26  |
| 321007 | Serac1    | serine active site containing 1                                        | 134 | 134 | 135 |
| 68607  | Serhl     | serine hydrolase-like                                                  | 128 | 134 | 133 |
| 56442  | Serinc1   | serine incorporator 1                                                  | 184 | 191 | 176 |
| 230779 | Serinc2   | serine incorporator 2                                                  | 114 | 110 | 113 |
| 218442 | Serinc5   | serine incorporator 5                                                  | 277 | 296 | 275 |
| 28146  | Serp1     | stress-associated endoplasmic reticulum protein 1                      | 60  | 67  | 64  |
| 20700  | Serpina1a | serine (or cysteine) peptidase inhibitor, clade A, member 1A           | 169 | 171 | 167 |
| 20701  | Serpina1b | serine (or cysteine) peptidase inhibitor, clade A, member 1B           | 103 | 99  | 99  |
| 268591 | Serpina5  | serine (or cysteine) peptidase inhibitor, clade A, member 5            | 43  | 44  | 46  |
| 12401  | Serpina6  | serine (or cysteine) peptidase inhibitor, clade A, member 6            | 87  | 86  | 76  |
| 20720  | Serpine2  | serine (or cysteine) peptidase inhibitor, clade E, member 2            | 576 | 579 | 557 |
| 12258  | Serping1  | serine (or cysteine) peptidase inhibitor, clade G, member 1            | 76  | 68  | 78  |
| 12406  | Serpinh1  | serine (or cysteine) peptidase inhibitor, clade H, member 1            | 148 | 146 | 139 |
| 55942  | Sertad1   | SERTA domain containing 1                                              | 28  | 30  | 30  |
| 58172  | Sertad2   | SERTA domain containing 2                                              | 493 | 501 | 493 |
| 170742 | Sertad3   | SERTA domain containing 3                                              | 49  | 50  | 51  |
| 56086  | Set       | SET nuclear oncogene                                                   | 45  | 44  | 41  |
| 233904 | Setd1a    | SET domain containing 1A                                               | 36  | 36  | 39  |
| 235626 | Setd2     | SET domain containing 2                                                | 192 | 180 | 189 |
| 52690  | Setd3     | SET domain containing 3                                                | 218 | 221 | 229 |
| 66083  | Setd6     | SET domain containing 6                                                | 141 | 129 | 131 |
| 73251  | Setd7     | SET domain containing (lysine methyltransferase) 7                     | 132 | 127 | 126 |
| 67956  | Setd8     | SET domain containing (lysine methyltransferase) 8                     | 71  | 63  | 61  |
| 84505  | Setdb1    | SET domain, bifurcated 1                                               | 118 | 116 | 113 |
| 239122 | Setdb2    | SET domain, bifurcated 2                                               | 61  | 64  | 64  |
| 74729  | Setmar    | SET domain and mariner transposase fusion gene                         | 832 | 858 | 816 |
| 269254 | Setx      | senataxin                                                              | 249 | 251 | 244 |
| 22668  | Sf1       | splicing factor 1                                                      | 50  | 56  | 54  |
| 67465  | Sf3a1     | splicing factor 3a, subunit 1                                          | 29  | 32  | 35  |
| 20222  | Sf3a2     | splicing factor 3a, subunit 2                                          | 8   | 9   | 8   |
| 75062  | Sf3a3     | splicing factor 3a, subunit 3                                          | 41  | 39  | 38  |
| 81898  | Sf3b1     | splicing factor 3b, subunit 1                                          | 169 | 163 | 159 |
| 101943 | Sf3b3     | splicing factor 3b, subunit 3                                          | 12  | 10  | 12  |
| 107701 | Sf3b4     | splicing factor 3b, subunit 4                                          | 25  | 25  | 24  |
| 66125  | Sf3b5     | splicing factor 3b, subunit 5                                          | 166 | 167 | 156 |
| 20375  | Sfpi1     | SFFV proviral integration 1                                            | 63  | 58  | 61  |
| 71514  | Sfpq      | splicing factor proline/glutamine rich (polypyrimidine tract binding p | 122 | 119 | 122 |
| 20377  | Sfrp1     | secreted frizzled-related protein 1                                    | 527 | 538 | 525 |
| 20319  | Sfrp2     | secreted frizzled-related protein 2                                    | 332 | 340 | 347 |
| 20379  | Sfrp4     | secreted frizzled-related protein 4                                    | 97  | 97  | 97  |
| 231769 | Sfswap    | splicing factor, suppressor of white-apricot homolog (Drosophila)      | 646 | 632 | 639 |
| 20388  | Sftpb     | surfactant associated protein B                                        | 142 | 144 | 146 |
| 20393  | Sgk1      | serum/glucocorticoid regulated kinase 1                                | 763 | 751 | 760 |
| 27219  | Sgk2      | serum/glucocorticoid regulated kinase 2                                | 100 | 90  | 93  |
| 170755 | Sgk3      | serum/glucocorticoid regulated kinase 3                                | 269 | 270 | 266 |
| 208449 | Sgms1     | sphingomyelin synthase 1                                               | 591 | 586 | 588 |
| 74442  | Sgms2     | sphingomyelin synthase 2                                               | 164 | 157 | 156 |
| 20397  | Sgpl1     | sphingosine phosphate lyase 1                                          | 107 | 100 | 114 |
| 81535  | Sgpp1     | sphingosine-1-phosphate phosphatase 1                                  | 194 | 193 | 199 |
| 433323 | Sgpp2     | sphingosine-1-phosphate phosphatase 2                                  | 373 | 367 | 370 |
| 27029  | Sgsh      | N-sulfoglucosamine sulfohydrolase (sulfamidase)                        | 44  | 48  | 48  |
| 105835 | Sgsm3     | small G protein signaling modulator 3                                  | 206 | 199 | 199 |
| 26904  | Sh2d1b1   | SH2 domain protein 1B1                                                 | 89  | 91  | 95  |
| 545378 | Sh2d1b2   | SH2 domain protein 1B2                                                 | 93  | 81  | 81  |

|        |          |                                                                       |      |      |      |
|--------|----------|-----------------------------------------------------------------------|------|------|------|
| 73723  | Sh3bgrl3 | SH3 domain binding glutamic acid-rich protein-like 3                  | 114  | 108  | 113  |
| 24056  | Sh3bp5   | SH3-domain binding protein 5 (BTK-associated)                         | 211  | 204  | 217  |
| 27059  | Sh3d19   | SH3 domain protein D19                                                | 184  | 180  | 177  |
| 54673  | Sh3glb1  | SH3-domain GRB2-like B1 (endophilin)                                  | 240  | 236  | 232  |
| 58194  | Sh3kbp1  | SH3-domain kinase binding protein 1                                   | 829  | 827  | 796  |
| 14218  | Sh3pxd2a | SH3 and PX domains 2A                                                 | 391  | 390  | 386  |
| 268396 | Sh3pxd2b | SH3 and PX domains 2B                                                 | 195  | 190  | 192  |
| 106025 | Sharpin  | SHANK-associated RH domain interacting protein                        | 9    | 7    | 8    |
| 20416  | Shc1     | src homology 2 domain-containing transforming protein C1              | 20   | 21   | 17   |
| 20422  | Shfm1    | split hand/foot malformation (ectrodactyly) type 1                    | 838  | 827  | 823  |
| 20423  | Shh      | sonic hedgehog                                                        | 945  | 942  | 950  |
| 20425  | Shmt1    | serine hydroxymethyltransferase 1 (soluble)                           | 67   | 67   | 70   |
| 108037 | Shmt2    | serine hydroxymethyltransferase 2 (mitochondrial)                     | 24   | 20   | 21   |
| 20429  | Shox2    | short stature homeobox 2                                              | 882  | 894  | 853  |
| 74637  | Shpk     | sedoheptulokinase                                                     | 51   | 44   | 49   |
| 268281 | Shprh    | SNF2 histone linker PHD RING helicase                                 | 252  | 255  | 254  |
| 20437  | Siah1a   | seven in absentia 1A                                                  | 188  | 183  | 180  |
| 20438  | Siah1b   | seven in absentia 1B                                                  | 77   | 74   | 71   |
| 20439  | Siah2    | seven in absentia 2                                                   | 297  | 300  | 289  |
| 24058  | Sigirr   | single immunoglobulin and toll-interleukin 1 receptor (TIR) domain    | 43   | 48   | 48   |
| 18391  | Sigmar1  | sigma non-opioid intracellular receptor 1                             | 32   | 30   | 26   |
| 17691  | Sik1     | salt inducible kinase 1                                               | 433  | 431  | 453  |
| 235344 | Sik2     | salt inducible kinase 2                                               | 272  | 292  | 266  |
| 70661  | Sik3     | SIK family kinase 3                                                   | 320  | 313  | 315  |
| 20464  | Sim1     | single-minded homolog 1 (Drosophila)                                  | 1118 | 1122 | 1101 |
| 20465  | Sim2     | single-minded homolog 2 (Drosophila)                                  | 180  | 184  | 189  |
| 20466  | Sin3a    | transcriptional regulator, SIN3A (yeast)                              | 181  | 184  | 183  |
| 20467  | Sin3b    | transcriptional regulator, SIN3B (yeast)                              | 150  | 148  | 158  |
| 66603  | Sip1     | survival of motor neuron protein interacting protein 1                | 62   | 70   | 63   |
| 93759  | Sirt1    | sirtuin 1 (silent mating type information regulation 2, homolog) 1 (S | 180  | 176  | 185  |
| 64383  | Sirt2    | sirtuin 2 (silent mating type information regulation 2, homolog) 2 (S | 27   | 28   | 26   |
| 64384  | Sirt3    | sirtuin 3 (silent mating type information regulation 2, homolog) 3 (S | 34   | 33   | 32   |
| 75387  | Sirt4    | sirtuin 4 (silent mating type information regulation 2 homolog) 4 (S. | 54   | 55   | 55   |
| 68346  | Sirt5    | sirtuin 5 (silent mating type information regulation 2 homolog) 5 (S. | 126  | 119  | 124  |
| 50721  | Sirt6    | sirtuin 6 (silent mating type information regulation 2, homolog) 6 (S | 28   | 25   | 28   |
| 209011 | Sirt7    | sirtuin 7 (silent mating type information regulation 2, homolog) 7 (S | 15   | 18   | 17   |
| 20471  | Six1     | sine oculis-related homeobox 1 homolog (Drosophila)                   | 211  | 219  | 216  |
| 20472  | Six2     | sine oculis-related homeobox 2 homolog (Drosophila)                   | 659  | 670  | 657  |
| 20473  | Six3     | sine oculis-related homeobox 3 homolog (Drosophila)                   | 85   | 85   | 91   |
| 20474  | Six4     | sine oculis-related homeobox 4 homolog (Drosophila)                   | 100  | 96   | 97   |
| 20475  | Six5     | sine oculis-related homeobox 5 homolog (Drosophila)                   | 32   | 36   | 36   |
| 78473  | Skap1    | src family associated phosphoprotein 1                                | 400  | 418  | 411  |
| 20481  | Ski      | ski sarcoma viral oncogene homolog (avian)                            | 198  | 193  | 203  |
| 20482  | Skil     | SKI-like                                                              | 198  | 202  | 203  |
| 108077 | Skiv2l   | superkiller viralicidic activity 2-like (S. cerevisiae)               | 17   | 15   | 17   |
| 72198  | Skiv2l2  | superkiller viralicidic activity 2-like 2 (S. cerevisiae)             | 170  | 170  | 156  |
| 207667 | Skor1    | SKI family transcriptional corepressor 1                              | 523  | 498  | 518  |
| 664805 | Skor2    | SKI family transcriptional corepressor 2                              | 935  | 927  | 925  |
| 21402  | Skp1a    | S-phase kinase-associated protein 1A                                  | 87   | 93   | 93   |
| 27401  | Skp2     | S-phase kinase-associated protein 2 (p45)                             | 93   | 92   | 88   |
| 77799  | Sla2     | Src-like-adaptor 2                                                    | 168  | 160  | 168  |
| 20492  | Slbp     | stem-loop binding protein                                             | 35   | 36   | 36   |
| 18173  | Slc11a1  | solute carrier family 11 (proton-coupled divalent metal ion transport | 40   | 36   | 34   |
| 18174  | Slc11a2  | solute carrier family 11 (proton-coupled divalent metal ion transport | 134  | 136  | 130  |
| 66859  | Slc16a9  | solute carrier family 16 (monocarboxylic acid transporters), membe    | 305  | 311  | 301  |

|        |          |                                                                                                   |      |      |      |
|--------|----------|---------------------------------------------------------------------------------------------------|------|------|------|
| 20504  | Slc17a1  | solute carrier family 17 (sodium phosphate), member 1                                             | 99   | 95   | 90   |
| 105355 | Slc17a3  | solute carrier family 17 (sodium phosphate), member 3                                             | 83   | 80   | 73   |
| 20512  | Slc1a3   | solute carrier family 1 (glial high affinity glutamate transporter), member 1                     | 680  | 674  | 677  |
| 20521  | Slc22a12 | solute carrier family 22 (organic anion/cation transporter), member 12                            | 527  | 526  | 522  |
| 30805  | Slc22a4  | solute carrier family 22 (organic cation transporter), member 4                                   | 114  | 112  | 116  |
| 20520  | Slc22a5  | solute carrier family 22 (organic cation transporter), member 5                                   | 148  | 154  | 157  |
| 54338  | Slc23a2  | solute carrier family 23 (nucleobase transporters), member 2                                      | 274  | 275  | 276  |
| 78830  | Slc25a12 | solute carrier family 25 (mitochondrial carrier, Aralar), member 12                               | 236  | 225  | 238  |
| 50799  | Slc25a13 | solute carrier family 25 (mitochondrial carrier, adenine nucleotide transporter), member 13       | 1108 | 1125 | 1107 |
| 20524  | Slc25a17 | solute carrier family 25 (mitochondrial carrier, peroxisomal membrane protein), member 17         | 214  | 222  | 209  |
| 68066  | Slc25a39 | solute carrier family 25, member 39                                                               | 45   | 44   | 49   |
| 26457  | Slc27a1  | solute carrier family 27 (fatty acid transporter), member 1                                       | 27   | 26   | 29   |
| 26458  | Slc27a2  | solute carrier family 27 (fatty acid transporter), member 2                                       | 172  | 162  | 157  |
| 26568  | Slc27a3  | solute carrier family 27 (fatty acid transporter), member 3                                       | 117  | 113  | 120  |
| 26569  | Slc27a4  | solute carrier family 27 (fatty acid transporter), member 4                                       | 47   | 50   | 44   |
| 26459  | Slc27a5  | solute carrier family 27 (fatty acid transporter), member 5                                       | 44   | 42   | 44   |
| 225579 | Slc27a6  | solute carrier family 27 (fatty acid transporter), member 6                                       | 561  | 576  | 579  |
| 56017  | Slc2a8   | solute carrier family 2, (facilitated glucose transporter), member 8                              | 162  | 158  | 156  |
| 117591 | Slc2a9   | solute carrier family 2 (facilitated glucose transporter), member 9                               | 330  | 346  | 357  |
| 109108 | Slc30a9  | solute carrier family 30 (zinc transporter), member 9                                             | 197  | 218  | 215  |
| 228368 | Slc35c1  | solute carrier family 35, member C1                                                               | 219  | 214  | 211  |
| 56857  | Slc37a2  | solute carrier family 37 (glycerol-3-phosphate transporter), member 2                             | 182  | 183  | 178  |
| 14385  | Slc37a4  | solute carrier family 37 (glucose-6-phosphate transporter), member 4                              | 30   | 38   | 31   |
| 17254  | Slc3a2   | solute carrier family 3 (activators of dibasic and neutral amino acid transporters), member 2     | 86   | 84   | 84   |
| 22293  | Slc45a2  | solute carrier family 45, member 2                                                                | 78   | 72   | 68   |
| 94229  | Slc4a10  | solute carrier family 4, sodium bicarbonate cotransporter-like, member 10                         | 769  | 780  | 766  |
| 19729  | Slc50a1  | solute carrier family 50 (sugar transporter), member 1                                            | 19   | 13   | 20   |
| 53881  | Slc5a3   | solute carrier family 5 (inositol transporters), member 3                                         | 157  | 162  | 170  |
| 63993  | Slc5a7   | solute carrier family 5 (choline transporter), member 7                                           | 1824 | 1823 | 1844 |
| 13162  | Slc6a3   | solute carrier family 6 (neurotransmitter transporter, dopamine), member 3                        | 185  | 169  | 180  |
| 15567  | Slc6a4   | solute carrier family 6 (neurotransmitter transporter, serotonin), member 4                       | 173  | 168  | 170  |
| 11988  | Slc7a2   | solute carrier family 7 (cationic amino acid transporter, y+ system), member 2                    | 126  | 134  | 129  |
| 108115 | Slco4a1  | solute carrier organic anion transporter family, member 4a1                                       | 127  | 121  | 124  |
| 20563  | Slit2    | slit homolog 2 (Drosophila)                                                                       | 2960 | 3003 | 2932 |
| 20564  | Slit3    | slit homolog 3 (Drosophila)                                                                       | 1010 | 1019 | 1006 |
| 20874  | Slk      | STE20-like kinase (yeast)                                                                         | 198  | 211  | 201  |
| 20568  | Slpi     | secretory leukocyte peptidase inhibitor                                                           | 94   | 91   | 92   |
| 66660  | Sltm     | SAFB-like, transcription modulator                                                                | 199  | 207  | 197  |
| 193116 | Slu7     | SLU7 splicing factor homolog (S. cerevisiae)                                                      | 65   | 63   | 61   |
| 75764  | Slx1b    | SLX1 structure-specific endonuclease subunit homolog B (S. cerevisiae)                            | 26   | 23   | 27   |
| 52864  | Slx4     | SLX4 structure-specific endonuclease subunit homolog (S. cerevisiae)                              | 78   | 77   | 82   |
| 17125  | Smad1    | MAD homolog 1 (Drosophila)                                                                        | 439  | 448  | 428  |
| 17126  | Smad2    | MAD homolog 2 (Drosophila)                                                                        | 1146 | 1147 | 1142 |
| 17127  | Smad3    | MAD homolog 3 (Drosophila)                                                                        | 557  | 517  | 534  |
| 17128  | Smad4    | MAD homolog 4 (Drosophila)                                                                        | 225  | 228  | 226  |
| 17129  | Smad5    | MAD homolog 5 (Drosophila)                                                                        | 373  | 382  | 370  |
| 17130  | Smad6    | MAD homolog 6 (Drosophila)                                                                        | 457  | 440  | 463  |
| 17131  | Smad7    | MAD homolog 7 (Drosophila)                                                                        | 863  | 844  | 870  |
| 55994  | Smad9    | MAD homolog 9 (Drosophila)                                                                        | 94   | 95   | 90   |
| 93761  | Smarca1  | SWI/SNF related, matrix associated, actin dependent regulator of chromatin, subfamily A, member 1 | 1793 | 1773 | 1689 |
| 67155  | Smarca2  | SWI/SNF related, matrix associated, actin dependent regulator of chromatin, subfamily A, member 2 | 1743 | 1764 | 1723 |
| 20586  | Smarca4  | SWI/SNF related, matrix associated, actin dependent regulator of chromatin, subfamily A, member 4 | 149  | 155  | 156  |
| 93762  | Smarca5  | SWI/SNF related, matrix associated, actin dependent regulator of chromatin, subfamily A, member 5 | 356  | 342  | 344  |
| 54380  | Smarca11 | SWI/SNF related matrix associated, actin dependent regulator of chromatin, subfamily A, member 11 | 213  | 213  | 208  |
| 20587  | Smarcb1  | SWI/SNF related, matrix associated, actin dependent regulator of chromatin, subfamily B, member 1 | 49   | 47   | 47   |

|        |          |                                                                    |      |      |      |
|--------|----------|--------------------------------------------------------------------|------|------|------|
| 20588  | Smarcc1  | SWI/SNF related, matrix associated, actin dependent regulator of c | 169  | 178  | 172  |
| 68094  | Smarcc2  | SWI/SNF related, matrix associated, actin dependent regulator of c | 105  | 104  | 112  |
| 83797  | Smarcd1  | SWI/SNF related, matrix associated, actin dependent regulator of c | 60   | 52   | 57   |
| 83796  | Smarcd2  | SWI/SNF related, matrix associated, actin dependent regulator of c | 28   | 26   | 31   |
| 66993  | Smarcd3  | SWI/SNF related, matrix associated, actin dependent regulator of c | 62   | 60   | 69   |
| 57376  | Smarce1  | SWI/SNF related, matrix associated, actin dependent regulator of c | 115  | 113  | 110  |
| 24061  | Smc1a    | structural maintenance of chromosomes 1A                           | 168  | 150  | 159  |
| 140557 | Smc1b    | structural maintenance of chromosomes 1B                           | 116  | 123  | 120  |
| 14211  | Smc2     | structural maintenance of chromosomes 2                            | 1746 | 1745 | 1732 |
| 13006  | Smc3     | structural maintenance of chromosomes 3                            | 197  | 190  | 187  |
| 70099  | Smc4     | structural maintenance of chromosomes 4                            | 3    | 3    | 4    |
| 226026 | Smc5     | structural maintenance of chromosomes 5                            | 388  | 380  | 381  |
| 67241  | Smc6     | structural maintenance of chromosomes 6                            | 212  | 225  | 212  |
| 233789 | Smg1     | SMG1 homolog, phosphatidylinositol 3-kinase-related kinase (C. el  | 147  | 148  | 153  |
| 229512 | Smg5     | Smg-5 homolog, nonsense mediated mRNA decay factor (C. eleg        | 42   | 33   | 37   |
| 103677 | Smg6     | Smg-6 homolog, nonsense mediated mRNA decay factor (C. eleg        | 187  | 185  | 175  |
| 226517 | Smg7     | Smg-7 homolog, nonsense mediated mRNA decay factor (C. eleg        | 222  | 223  | 217  |
| 20595  | Smn1     | survival motor neuron 1                                            | 123  | 124  | 123  |
| 76479  | Smndc1   | survival motor neuron domain containing 1                          | 180  | 174  | 168  |
| 319757 | Smo      | smoothened homolog (Drosophila)                                    | 93   | 91   | 87   |
| 236574 | Smok2b   | sperm motility kinase 2B                                           | 68   | 65   | 72   |
| 272667 | Smok4a   | sperm motility kinase 4A                                           | 319  | 314  | 309  |
| 228608 | Smox     | spermine oxidase                                                   | 260  | 257  | 263  |
| 20597  | Smpd1    | sphingomyelin phosphodiesterase 1, acid lysosomal                  | 130  | 128  | 129  |
| 20598  | Smpd2    | sphingomyelin phosphodiesterase 2, neutral                         | 17   | 14   | 17   |
| 58994  | Smpd3    | sphingomyelin phosphodiesterase 3, neutral                         | 266  | 263  | 265  |
| 77626  | Smpd4    | sphingomyelin phosphodiesterase 4                                  | 92   | 96   | 91   |
| 57319  | Smpdl3a  | sphingomyelin phosphodiesterase, acid-like 3A                      | 175  | 177  | 181  |
| 100340 | Smpdl3b  | sphingomyelin phosphodiesterase, acid-like 3B                      | 53   | 49   | 49   |
| 20603  | Sms      | spermine synthase                                                  | 200  | 201  | 185  |
| 68678  | Smtnl1   | smoothelin-like 1                                                  | 39   | 34   | 37   |
| 71726  | Smug1    | single-strand selective monofunctional uracil DNA glycosylase      | 215  | 220  | 218  |
| 75788  | Smurf1   | SMAD specific E3 ubiquitin protein ligase 1                        | 319  | 311  | 316  |
| 66313  | Smurf2   | SMAD specific E3 ubiquitin protein ligase 2                        | 266  | 273  | 279  |
| 12180  | Smyd1    | SET and MYND domain containing 1                                   | 97   | 94   | 90   |
| 226830 | Smyd2    | SET and MYND domain containing 2                                   | 553  | 556  | 568  |
| 69726  | Smyd3    | SET and MYND domain containing 3                                   | 1328 | 1305 | 1329 |
| 20613  | Snai1    | snail homolog 1 (Drosophila)                                       | 171  | 177  | 182  |
| 20583  | Snai2    | snail homolog 2 (Drosophila)                                       | 438  | 441  | 444  |
| 30927  | Snai3    | snail homolog 3 (Drosophila)                                       | 34   | 30   | 32   |
| 75627  | Snapc1   | small nuclear RNA activating complex, polypeptide 1                | 120  | 114  | 115  |
| 102209 | Snapc2   | small nuclear RNA activating complex, polypeptide 2                | 10   | 10   | 13   |
| 77634  | Snapc3   | small nuclear RNA activating complex, polypeptide 3                | 206  | 215  | 216  |
| 227644 | Snapc4   | small nuclear RNA activating complex, polypeptide 4                | 39   | 42   | 37   |
| 330959 | Snapc5   | small nuclear RNA activating complex, polypeptide 5                | 79   | 82   | 83   |
| 20617  | Snca     | synuclein, alpha                                                   | 676  | 695  | 673  |
| 67847  | Sncaip   | synuclein, alpha interacting protein (synphilin)                   | 608  | 604  | 597  |
| 104069 | Sncb     | synuclein, beta                                                    | 45   | 38   | 43   |
| 56463  | Snd1     | staphylococcal nuclease and tudor domain containing 1              | 507  | 495  | 493  |
| 27681  | Snf8     | SNF8, ESCRT-II complex subunit, homolog (S. cerevisiae)            | 54   | 53   | 56   |
| 76793  | Snip1    | Smad nuclear interacting protein 1                                 | 23   | 26   | 23   |
| 20623  | Snrk     | SNF related kinase                                                 | 388  | 378  | 387  |
| 320632 | Snrnp200 | small nuclear ribonucleoprotein 200 (U5)                           | 58   | 51   | 55   |
| 78372  | Snrnp25  | small nuclear ribonucleoprotein 25 (U11/U12)                       | 24   | 31   | 30   |
| 66618  | Snrnp27  | small nuclear ribonucleoprotein 27 (U4/U6.U5)                      | 88   | 86   | 88   |

|        |        |                                                                 |      |      |      |
|--------|--------|-----------------------------------------------------------------|------|------|------|
| 76167  | Snmp35 | small nuclear ribonucleoprotein 35 (U11/U12)                    | 63   | 65   | 66   |
| 66585  | Snmp40 | small nuclear ribonucleoprotein 40 (U5)                         | 90   | 90   | 85   |
| 67797  | Snmp48 | small nuclear ribonucleoprotein 48 (U11/U12)                    | 257  | 257  | 252  |
| 20637  | Snmp70 | small nuclear ribonucleoprotein 70 (U1)                         | 43   | 49   | 48   |
| 53607  | Snrpa  | small nuclear ribonucleoprotein polypeptide A                   | 57   | 57   | 62   |
| 68981  | Snrpa1 | small nuclear ribonucleoprotein polypeptide A'                  | 298  | 289  | 287  |
| 20638  | Snrpb  | small nuclear ribonucleoprotein B                               | 88   | 88   | 96   |
| 20639  | Snrpb2 | U2 small nuclear ribonucleoprotein B                            | 218  | 228  | 229  |
| 20630  | Snrpc  | U1 small nuclear ribonucleoprotein C                            | 49   | 43   | 48   |
| 20641  | Snrpd1 | small nuclear ribonucleoprotein D1                              | 128  | 126  | 123  |
| 107686 | Snrpd2 | small nuclear ribonucleoprotein D2                              | 22   | 20   | 21   |
| 67332  | Snrpd3 | small nuclear ribonucleoprotein D3                              | 57   | 55   | 60   |
| 20643  | Snrpe  | small nuclear ribonucleoprotein E                               | 314  | 304  | 312  |
| 69878  | Snrpf  | small nuclear ribonucleoprotein polypeptide F                   | 132  | 125  | 130  |
| 66354  | Snw1   | SNW domain containing 1                                         | 88   | 92   | 90   |
| 56440  | Snx1   | sorting nexin 1                                                 | 72   | 76   | 76   |
| 72183  | Snx6   | sorting nexin 6                                                 | 228  | 215  | 222  |
| 20652  | Soat1  | sterol O-acyltransferase 1                                      | 201  | 204  | 216  |
| 223920 | Soat2  | sterol O-acyltransferase 2                                      | 55   | 57   | 60   |
| 12703  | Socs1  | suppressor of cytokine signaling 1                              | 295  | 300  | 302  |
| 56468  | Socs5  | suppressor of cytokine signaling 5                              | 292  | 303  | 307  |
| 192157 | Socs7  | suppressor of cytokine signaling 7                              | 134  | 122  | 131  |
| 20655  | Sod1   | superoxide dismutase 1, soluble                                 | 188  | 183  | 175  |
| 20656  | Sod2   | superoxide dismutase 2, mitochondrial                           | 78   | 77   | 76   |
| 20657  | Sod3   | superoxide dismutase 3, extracellular                           | 489  | 486  | 481  |
| 227631 | Sohlh1 | spermatogenesis and oogenesis specific basic helix-loop-helix 1 | 53   | 48   | 54   |
| 74434  | Sohlh2 | spermatogenesis and oogenesis specific basic helix-loop-helix 2 | 132  | 135  | 129  |
| 50817  | Solh   | small optic lobes homolog (Drosophila)                          | 92   | 88   | 92   |
| 20658  | Son    | Son DNA binding protein                                         | 53   | 51   | 54   |
| 20411  | Sorbs1 | sorbin and SH3 domain containing 1                              | 548  | 554  | 541  |
| 20410  | Sorbs3 | sorbin and SH3 domain containing 3                              | 136  | 141  | 133  |
| 20322  | Sord   | sorbitol dehydrogenase                                          | 146  | 146  | 142  |
| 20660  | Sorl1  | sortilin-related receptor, LDLR class A repeats-containing      | 890  | 889  | 873  |
| 74499  | Sost   | sclerostin                                                      | 120  | 112  | 112  |
| 20665  | Sox10  | SRY-box containing gene 10                                      | 29   | 30   | 27   |
| 20666  | Sox11  | SRY-box containing gene 11                                      | 2644 | 2682 | 2638 |
| 20667  | Sox12  | SRY-box containing gene 12                                      | 45   | 42   | 45   |
| 20668  | Sox13  | SRY-box containing gene 13                                      | 314  | 318  | 309  |
| 20669  | Sox14  | SRY-box containing gene 14                                      | 970  | 982  | 976  |
| 20670  | Sox15  | SRY-box containing gene 15                                      | 34   | 35   | 36   |
| 20671  | Sox17  | SRY-box containing gene 17                                      | 489  | 492  | 484  |
| 20672  | Sox18  | SRY-box containing gene 18                                      | 101  | 100  | 101  |
| 20674  | Sox2   | SRY-box containing gene 2                                       | 1430 | 1460 | 1441 |
| 223227 | Sox21  | SRY-box containing gene 21                                      | 171  | 154  | 162  |
| 20675  | Sox3   | SRY-box containing gene 3                                       | 803  | 817  | 763  |
| 214105 | Sox30  | SRY-box containing gene 30                                      | 130  | 119  | 121  |
| 20677  | Sox4   | SRY-box containing gene 4                                       | 2198 | 2213 | 2192 |
| 20678  | Sox5   | SRY-box containing gene 5                                       | 2321 | 2321 | 2333 |
| 20679  | Sox6   | SRY-box containing gene 6                                       | 1774 | 1766 | 1753 |
| 20680  | Sox7   | SRY-box containing gene 7                                       | 169  | 154  | 168  |
| 20681  | Sox8   | SRY-box containing gene 8                                       | 103  | 98   | 97   |
| 20682  | Sox9   | SRY-box containing gene 9                                       | 615  | 628  | 624  |
| 20683  | Sp1    | trans-acting transcription factor 1                             | 105  | 108  | 104  |
| 20684  | Sp100  | nuclear antigen Sp100                                           | 171  | 170  | 170  |
| 109032 | Sp110  | Sp110 nuclear body protein                                      | 58   | 56   | 60   |

|        |         |                                                                     |      |      |      |
|--------|---------|---------------------------------------------------------------------|------|------|------|
| 78912  | Sp2     | Sp2 transcription factor                                            | 89   | 89   | 91   |
| 20687  | Sp3     | trans-acting transcription factor 3                                 | 952  | 955  | 961  |
| 20688  | Sp4     | trans-acting transcription factor 4                                 | 804  | 818  | 816  |
| 64406  | Sp5     | trans-acting transcription factor 5                                 | 600  | 598  | 604  |
| 83395  | Sp6     | trans-acting transcription factor 6                                 | 67   | 64   | 64   |
| 170574 | Sp7     | Sp7 transcription factor 7                                          | 70   | 74   | 69   |
| 320145 | Sp8     | trans-acting transcription factor 8                                 | 845  | 873  | 855  |
| 381373 | Sp9     | trans-acting transcription factor 9                                 | 117  | 123  | 116  |
| 75622  | Spaca3  | sperm acrosome associated 3                                         | 451  | 460  | 450  |
| 278203 | Spaca5  | sperm acrosome associated 5                                         | 32   | 30   | 34   |
| 70834  | Spag9   | sperm associated antigen 9                                          | 360  | 373  | 364  |
| 20690  | Spam1   | sperm adhesion molecule 1                                           | 142  | 139  | 142  |
| 73472  | Spata18 | spermatogenesis associated 18                                       | 576  | 545  | 528  |
| 71242  | Spata24 | spermatogenesis associated 24                                       | 72   | 71   | 69   |
| 69019  | Spcs1   | signal peptidase complex subunit 1 homolog (S. cerevisiae)          | 18   | 18   | 18   |
| 66624  | Spcs2   | signal peptidase complex subunit 2 homolog (S. cerevisiae)          | 35   | 38   | 38   |
| 30051  | Spdef   | SAM pointed domain containing ets transcription factor              | 176  | 162  | 164  |
| 320277 | Spef2   | sperm flagellar 2                                                   | 809  | 821  | 815  |
| 11790  | Speg    | SPEG complex locus                                                  | 100  | 102  | 102  |
| 56381  | Spen    | SPEN homolog, transcriptional regulator (Drosophila)                | 129  | 126  | 129  |
| 234847 | Spg7    | spastic paraplegia 7 homolog (human)                                | 75   | 79   | 76   |
| 20698  | Sphk1   | sphingosine kinase 1                                                | 120  | 121  | 110  |
| 56632  | Sphk2   | sphingosine kinase 2                                                | 16   | 17   | 17   |
| 272382 | Spib    | Spi-B transcription factor (Spi-1/PU.1 related)                     | 27   | 26   | 27   |
| 20728  | Spic    | Spi-C transcription factor (Spi-1/PU.1 related)                     | 166  | 164  | 161  |
| 78242  | Spink12 | serine peptidase inhibitor, Kazal type 11                           | 104  | 115  | 105  |
| 20731  | Spink4  | serine peptidase inhibitor, Kazal type 4                            | 130  | 129  | 128  |
| 72432  | Spink5  | serine peptidase inhibitor, Kazal type 5                            | 294  | 301  | 288  |
| 75526  | Spinlw1 | serine protease inhibitor-like, with Kunitz and WAP domains 1 (epp) | 37   | 37   | 39   |
| 20737  | Spn     | sialophorin                                                         | 100  | 98   | 99   |
| 20739  | Spna1   | spectrin alpha 1                                                    | 114  | 103  | 108  |
| 20741  | Spnb1   | spectrin beta 1                                                     | 308  | 301  | 305  |
| 20742  | Spnb2   | spectrin beta 2                                                     | 585  | 594  | 588  |
| 26972  | Spo11   | sporulation protein, meiosis-specific, SPO11 homolog (S. cerevisia) | 71   | 78   | 76   |
| 94214  | Spock2  | sparc/osteonectin, cwcv and kazal-like domains proteoglycan 2       | 271  | 275  | 267  |
| 72902  | Spock3  | sparc/osteonectin, cwcv and kazal-like domains proteoglycan 3       | 2261 | 2336 | 2245 |
| 74585  | Sppl3   | signal peptide peptidase 3                                          | 192  | 197  | 193  |
| 20751  | Spr     | sepiapterin reductase                                               | 80   | 79   | 83   |
| 20753  | Sprr1a  | small proline-rich protein 1A                                       | 48   | 54   | 51   |
| 20754  | Sprr1b  | small proline-rich protein 1B                                       | 32   | 34   | 30   |
| 20766  | Sprr3   | small proline-rich protein 3                                        | 63   | 62   | 59   |
| 24064  | Spry2   | sprouty homolog 2 (Drosophila)                                      | 1102 | 1086 | 1062 |
| 268656 | Sptlc1  | serine palmitoyltransferase, long chain base subunit 1              | 146  | 144  | 136  |
| 20773  | Sptlc2  | serine palmitoyltransferase, long chain base subunit 2              | 227  | 220  | 219  |
| 228677 | Sptlc3  | serine palmitoyltransferase, long chain base subunit 3              | 1092 | 1103 | 1081 |
| 79401  | Spz1    | spermatogenic leucine zipper 1                                      | 112  | 103  | 102  |
| 20775  | Sqle    | squalene epoxidase                                                  | 378  | 383  | 349  |
| 59010  | Sqrdl   | sulfide quinone reductase-like (yeast)                              | 2406 | 2417 | 2393 |
| 18412  | Sqstm1  | sequestosome 1                                                      | 65   | 64   | 64   |
| 24068  | Sra1    | steroid receptor RNA activator 1                                    | 19   | 19   | 19   |
| 78586  | Srbd1   | S1 RNA binding domain 1                                             | 621  | 619  | 598  |
| 20779  | Src     | Rous sarcoma oncogene                                               | 241  | 240  | 251  |
| 78925  | Srd5a1  | steroid 5 alpha-reductase 1                                         | 102  | 102  | 96   |
| 94224  | Srd5a2  | steroid 5 alpha-reductase 2                                         | 436  | 447  | 423  |
| 57357  | Srd5a3  | steroid 5 alpha-reductase 3                                         | 174  | 183  | 174  |

|        |          |                                                                         |      |      |      |
|--------|----------|-------------------------------------------------------------------------|------|------|------|
| 20787  | Sreb1    | sterol regulatory element binding transcription factor 1                | 265  | 259  | 255  |
| 20788  | Sreb2    | sterol regulatory element binding factor 2                              | 91   | 93   | 91   |
| 218543 | Srek1    | splicing regulatory glutamine/lysine-rich protein 1                     | 741  | 757  | 735  |
| 67288  | Srek1ip1 | splicing regulatory glutamine/lysine-rich protein 1 interacting protein | 58   | 63   | 57   |
| 20807  | Srf      | serum response factor                                                   | 107  | 101  | 111  |
| 67222  | Srfbp1   | serum response factor binding protein 1                                 | 254  | 254  | 249  |
| 19073  | Srgn     | serglycin                                                               | 119  | 119  | 127  |
| 20810  | Srm      | spermidine synthase                                                     | 51   | 54   | 57   |
| 20811  | Srms     | src-related kinase lacking C-terminal regulatory tyrosine and N-terr    | 22   | 18   | 18   |
| 20813  | Srp14    | signal recognition particle 14                                          | 205  | 213  | 219  |
| 24067  | Srp54a   | signal recognition particle 54A                                         | 111  | 113  | 108  |
| 20815  | Srpk1    | serine/arginine-rich protein specific kinase 1                          | 155  | 147  | 151  |
| 20817  | Srpk2    | serine/arginine-rich protein specific kinase 2                          | 357  | 352  | 351  |
| 56504  | Srpk3    | serine/arginine-rich protein specific kinase 3                          | 37   | 38   | 35   |
| 67398  | Srpr     | signal recognition particle receptor ('docking protein')                | 72   | 68   | 76   |
| 27364  | Srr      | serine racemase                                                         | 27   | 27   | 29   |
| 51796  | Srrm1    | serine/arginine repetitive matrix 1                                     | 144  | 137  | 140  |
| 75956  | Srrm2    | serine/arginine repetitive matrix 2                                     | 56   | 53   | 53   |
| 68955  | Srrm4    | serine/arginine repetitive matrix 4                                     | 908  | 877  | 865  |
| 83701  | Srrt     | serrate RNA effector molecule homolog (Arabidopsis)                     | 21   | 20   | 21   |
| 110809 | Srsf1    | serine/arginine-rich splicing factor 1                                  | 97   | 82   | 96   |
| 14105  | Srsf10   | serine/arginine-rich splicing factor 10                                 | 150  | 141  | 144  |
| 272009 | Srsf12   | serine/arginine-rich splicing factor 12                                 | 71   | 77   | 73   |
| 20382  | Srsf2    | serine/arginine-rich splicing factor 2                                  | 10   | 9    | 12   |
| 20383  | Srsf3    | serine/arginine-rich splicing factor 3                                  | 99   | 93   | 94   |
| 57317  | Srsf4    | serine/arginine-rich splicing factor 4                                  | 97   | 101  | 104  |
| 67996  | Srsf6    | serine/arginine-rich splicing factor 6                                  | 366  | 371  | 377  |
| 225027 | Srsf7    | serine/arginine-rich splicing factor 7                                  | 113  | 116  | 119  |
| 108014 | Srsf9    | serine/arginine-rich splicing factor 9                                  | 51   | 51   | 53   |
| 76650  | Srxn1    | sulfiredoxin 1 homolog (S. cerevisiae)                                  | 80   | 75   | 77   |
| 21674  | Sry      | sex determining region of Chr Y                                         | 150  | 152  | 149  |
| 268996 | Ss18     | synovial sarcoma translocation, Chromosome 18                           | 955  | 915  | 934  |
| 269397 | Ss18l1   | synovial sarcoma translocation gene on chromosome 18-like 1             | 35   | 33   | 34   |
| 20823  | Ssb      | Sjogren syndrome antigen B                                              | 86   | 80   | 78   |
| 381760 | Ssbp1    | single-stranded DNA binding protein 1                                   | 63   | 64   | 60   |
| 66970  | Ssbp2    | single-stranded DNA binding protein 2                                   | 647  | 653  | 657  |
| 72475  | Ssbp3    | single-stranded DNA binding protein 3                                   | 338  | 328  | 348  |
| 231637 | Ssh1     | slingshot homolog 1 (Drosophila)                                        | 120  | 116  | 125  |
| 237860 | Ssh2     | slingshot homolog 2 (Drosophila)                                        | 343  | 347  | 357  |
| 245857 | Ssh3     | slingshot homolog 3 (Drosophila)                                        | 72   | 65   | 59   |
| 20833  | Ssrp1    | structure specific recognition protein 1                                | 18   | 16   | 19   |
| 20606  | Sstr2    | somatostatin receptor 2                                                 | 109  | 112  | 110  |
| 20608  | Sstr4    | somatostatin receptor 4                                                 | 468  | 461  | 448  |
| 20609  | Sstr5    | somatostatin receptor 5                                                 | 121  | 128  | 122  |
| 68991  | Ssu72    | Ssu72 RNA polymerase II CTD phosphatase homolog (yeast)                 | 55   | 56   | 52   |
| 70356  | St13     | suppression of tumorigenicity 13                                        | 56   | 50   | 57   |
| 19143  | St14     | suppression of tumorigenicity 14 (colon carcinoma)                      | 236  | 229  | 233  |
| 240690 | St18     | suppression of tumorigenicity 18                                        | 915  | 939  | 922  |
| 20442  | St3gal1  | ST3 beta-galactoside alpha-2,3-sialyltransferase 1                      | 1652 | 1649 | 1646 |
| 20444  | St3gal2  | ST3 beta-galactoside alpha-2,3-sialyltransferase 2                      | 125  | 123  | 123  |
| 20441  | St3gal3  | ST3 beta-galactoside alpha-2,3-sialyltransferase 3                      | 318  | 340  | 325  |
| 20443  | St3gal4  | ST3 beta-galactoside alpha-2,3-sialyltransferase 4                      | 76   | 71   | 77   |
| 20454  | St3gal5  | ST3 beta-galactoside alpha-2,3-sialyltransferase 5                      | 426  | 418  | 421  |
| 54613  | St3gal6  | ST3 beta-galactoside alpha-2,3-sialyltransferase 6                      | 264  | 259  | 267  |
| 20440  | St6gal1  | beta galactoside alpha 2,6 sialyltransferase 1                          | 362  | 359  | 363  |

|        |            |                                                                    |      |      |      |
|--------|------------|--------------------------------------------------------------------|------|------|------|
| 240119 | St6gal2    | beta galactoside alpha 2,6 sialyltransferase 2                     | 1696 | 1692 | 1677 |
| 20445  | St6galnac1 | ST6 (alpha-N-acetyl-neuraminyl-2,3-beta-galactosyl-1,3)-N-acetylgl | 98   | 97   | 97   |
| 20446  | St6galnac2 | ST6 (alpha-N-acetyl-neuraminyl-2,3-beta-galactosyl-1,3)-N-acetylgl | 102  | 104  | 103  |
| 20447  | St6galnac3 | ST6 (alpha-N-acetyl-neuraminyl-2,3-beta-galactosyl-1,3)-N-acetylgl | 1135 | 1125 | 1117 |
| 20448  | St6galnac4 | ST6 (alpha-N-acetyl-neuraminyl-2,3-beta-galactosyl-1,3)-N-acetylgl | 29   | 28   | 28   |
| 26938  | St6galnac5 | ST6 (alpha-N-acetyl-neuraminyl-2,3-beta-galactosyl-1,3)-N-acetylgl | 1271 | 1303 | 1304 |
| 50935  | St6galnac6 | ST6 (alpha-N-acetyl-neuraminyl-2,3-beta-galactosyl-1,3)-N-acetylgl | 54   | 55   | 47   |
| 20449  | St8sia1    | ST8 alpha-N-acetyl-neuraminide alpha-2,8-sialyltransferase 1       | 388  | 377  | 382  |
| 20450  | St8sia2    | ST8 alpha-N-acetyl-neuraminide alpha-2,8-sialyltransferase 2       | 1065 | 1039 | 1031 |
| 20451  | St8sia3    | ST8 alpha-N-acetyl-neuraminide alpha-2,8-sialyltransferase 3       | 815  | 824  | 822  |
| 20452  | St8sia4    | ST8 alpha-N-acetyl-neuraminide alpha-2,8-sialyltransferase 4       | 1926 | 1980 | 1901 |
| 225742 | St8sia5    | ST8 alpha-N-acetyl-neuraminide alpha-2,8-sialyltransferase 5       | 275  | 277  | 277  |
| 241230 | St8sia6    | ST8 alpha-N-acetyl-neuraminide alpha-2,8-sialyltransferase 6       | 629  | 610  | 606  |
| 20843  | Stag2      | stromal antigen 2                                                  | 511  | 515  | 480  |
| 70527  | Stampb     | STAM binding protein                                               | 148  | 147  | 154  |
| 76630  | Stampb1    | STAM binding protein like 1                                        | 111  | 110  | 113  |
| 20845  | Star       | steroidogenic acute regulatory protein                             | 75   | 71   | 80   |
| 59045  | Stard3     | START domain containing 3                                          | 43   | 41   | 43   |
| 170460 | Stard5     | StAR-related lipid transfer (START) domain containing 5            | 204  | 185  | 195  |
| 170461 | Stard6     | StAR-related lipid transfer (START) domain containing 6            | 75   | 75   | 79   |
| 20846  | Stat1      | signal transducer and activator of transcription 1                 | 277  | 293  | 285  |
| 20848  | Stat3      | signal transducer and activator of transcription 3                 | 143  | 137  | 140  |
| 20849  | Stat4      | signal transducer and activator of transcription 4                 | 257  | 260  | 258  |
| 20850  | Stat5a     | signal transducer and activator of transcription 5A                | 112  | 108  | 105  |
| 20851  | Stat5b     | signal transducer and activator of transcription 5B                | 157  | 150  | 149  |
| 20852  | Stat6      | signal transducer and activator of transcription 6                 | 62   | 62   | 55   |
| 52331  | Stbd1      | starch binding domain 1                                            | 131  | 134  | 135  |
| 70358  | Steap1     | six transmembrane epithelial antigen of the prostate 1             | 2059 | 2062 | 2000 |
| 74051  | Steap2     | six transmembrane epithelial antigen of prostate 2                 | 108  | 105  | 115  |
| 68428  | Steap3     | STEAP family member 3                                              | 291  | 300  | 285  |
| 117167 | Steap4     | STEAP family member 4                                              | 895  | 905  | 874  |
| 20868  | Stk10      | serine/threonine kinase 10                                         | 151  | 146  | 144  |
| 20869  | Stk11      | serine/threonine kinase 11                                         | 38   | 40   | 43   |
| 20872  | Stk16      | serine/threonine kinase 16                                         | 10   | 11   | 11   |
| 98267  | Stk17b     | serine/threonine kinase 17b (apoptosis-inducing)                   | 644  | 639  | 631  |
| 54402  | Stk19      | serine/threonine kinase 19                                         | 18   | 14   | 18   |
| 223255 | Stk24      | serine/threonine kinase 24 (STE20 homolog, yeast)                  | 599  | 612  | 582  |
| 59041  | Stk25      | serine/threonine kinase 25 (yeast)                                 | 228  | 231  | 242  |
| 56274  | Stk3       | serine/threonine kinase 3 (Ste20, yeast homolog)                   | 565  | 605  | 581  |
| 26448  | Stk30      | serine/threonine kinase 30                                         | 142  | 144  | 139  |
| 77485  | Stk31      | serine threonine kinase 31                                         | 596  | 596  | 595  |
| 269019 | Stk32a     | serine/threonine kinase 32A                                        | 394  | 406  | 399  |
| 64293  | Stk32b     | serine/threonine kinase 32B                                        | 520  | 491  | 493  |
| 57740  | Stk32c     | serine/threonine kinase 32C                                        | 208  | 208  | 201  |
| 117229 | Stk33      | serine/threonine kinase 33                                         | 407  | 421  | 422  |
| 67333  | Stk35      | serine/threonine kinase 35                                         | 144  | 148  | 146  |
| 269209 | Stk36      | serine/threonine kinase 36 (fused homolog, Drosophila)             | 81   | 80   | 77   |
| 106504 | Stk38      | serine/threonine kinase 38                                         | 107  | 103  | 100  |
| 232533 | Stk38l     | serine/threonine kinase 38 like                                    | 205  | 201  | 202  |
| 53416  | Stk39      | serine/threonine kinase 39, STE20/SPS1 homolog (yeast)             | 603  | 589  | 603  |
| 58231  | Stk4       | serine/threonine kinase 4                                          | 127  | 131  | 127  |
| 74178  | Stk40      | serine/threonine kinase 40                                         | 67   | 69   | 66   |
| 20892  | Stra13     | stimulated by retinoic acid 13                                     | 44   | 44   | 43   |
| 20899  | Stra8      | stimulated by retinoic acid gene 8                                 | 90   | 81   | 85   |
| 72149  | Strada     | STE20-related kinase adaptor alpha                                 | 77   | 74   | 73   |

|        |          |                                                                      |      |      |      |
|--------|----------|----------------------------------------------------------------------|------|------|------|
| 227154 | Stradb   | STE20-related kinase adaptor beta                                    | 150  | 149  | 160  |
| 20901  | Strap    | serine/threonine kinase receptor associated protein                  | 137  | 136  | 129  |
| 94186  | Strn3    | striatin, calmodulin binding protein 3                               | 176  | 173  | 179  |
| 16430  | Stt3a    | STT3, subunit of the oligosaccharyltransferase complex, homolog I    | 91   | 97   | 98   |
| 68292  | Stt3b    | STT3, subunit of the oligosaccharyltransferase complex, homolog II   | 812  | 827  | 797  |
| 56424  | Stub1    | STIP1 homology and U-Box containing protein 1                        | 8    | 8    | 7    |
| 243659 | Styk1    | serine/threonine/tyrosine kinase 1                                   | 119  | 126  | 121  |
| 20024  | Sub1     | SUB1 homolog (S. cerevisiae)                                         | 275  | 273  | 276  |
| 20916  | Sucla2   | succinate-Coenzyme A ligase, ADP-forming, beta subunit               | 1393 | 1392 | 1373 |
| 56451  | Suclg1   | succinate-CoA ligase, GDP-forming, alpha subunit                     | 311  | 318  | 312  |
| 20917  | Suclg2   | succinate-Coenzyme A ligase, GDP-forming, beta subunit               | 1000 | 1004 | 984  |
| 71954  | Suds3    | suppressor of defective silencing 3 homolog (S. cerevisiae)          | 698  | 690  | 682  |
| 24069  | Sufu     | suppressor of fused homolog (Drosophila)                             | 132  | 132  | 127  |
| 70616  | Sugp1    | SURP and G patch domain containing 1                                 | 43   | 38   | 38   |
| 234373 | Sugp2    | SURP and G patch domain containing 2                                 | 26   | 28   | 29   |
| 240725 | Sulf1    | sulfatase 1                                                          | 2038 | 2058 | 1987 |
| 72043  | Sulf2    | sulfatase 2                                                          | 365  | 344  | 370  |
| 20887  | Sult1a1  | sulfotransferase family 1A, phenol-preferring, member 1              | 61   | 59   | 59   |
| 56362  | Sult1b1  | sulfotransferase family 1B, member 1                                 | 97   | 94   | 97   |
| 20888  | Sult1c1  | sulfotransferase family, cytosolic, 1C, member 1                     | 570  | 599  | 592  |
| 69083  | Sult1c2  | sulfotransferase family, cytosolic, 1C, member 2                     | 360  | 345  | 343  |
| 53315  | Sult1d1  | sulfotransferase family 1D, member 1                                 | 67   | 68   | 67   |
| 20860  | Sult1e1  | sulfotransferase family 1E, member 1                                 | 123  | 121  | 120  |
| 20859  | Sult2a1  | sulfotransferase family 2A, dehydroepiandrosterone (DHEA)-preferring | 316  | 335  | 310  |
| 54200  | Sult2b1  | sulfotransferase family, cytosolic, 2B, member 1                     | 72   | 76   | 71   |
| 29859  | Sult4a1  | sulfotransferase family 4A, member 1                                 | 81   | 70   | 71   |
| 58911  | Sumf1    | sulfatase modifying factor 1                                         | 190  | 195  | 189  |
| 22218  | Sumo1    | SMT3 suppressor of mif two 3 homolog 1 (yeast)                       | 217  | 226  | 215  |
| 170930 | Sumo2    | SMT3 suppressor of mif two 3 homolog 2 (yeast)                       | 49   | 57   | 55   |
| 20610  | Sumo3    | SMT3 suppressor of mif two 3 homolog 3 (yeast)                       | 49   | 54   | 46   |
| 211389 | Suox     | sulfite oxidase                                                      | 64   | 66   | 62   |
| 114741 | Supt16h  | suppressor of Ty 16 homolog (S. cerevisiae)                          | 129  | 129  | 130  |
| 109115 | Supt3h   | suppressor of Ty 3 homolog (S. cerevisiae)                           | 102  | 97   | 95   |
| 20922  | Supt4h1  | suppressor of Ty 4 homolog 1 (S. cerevisiae)                         | 113  | 119  | 128  |
| 20924  | Supt5h   | suppressor of Ty 5 homolog (S. cerevisiae)                           | 48   | 51   | 49   |
| 20926  | Supt6h   | suppressor of Ty 6 homolog (S. cerevisiae)                           | 72   | 68   | 74   |
| 72195  | Supt7I   | suppressor of Ty 7 (S. cerevisiae)-like                              | 42   | 46   | 42   |
| 338359 | Supv3I1  | suppressor of var1, 3-like 1 (S. cerevisiae)                         | 53   | 46   | 44   |
| 20930  | Surf1    | surfeit gene 1                                                       | 23   | 20   | 24   |
| 20937  | Suv39h1  | suppressor of variegation 3-9 homolog 1 (Drosophila)                 | 89   | 86   | 85   |
| 64707  | Suv39h2  | suppressor of variegation 3-9 homolog 2 (Drosophila)                 | 104  | 116  | 108  |
| 225888 | Suv420h1 | suppressor of variegation 4-20 homolog 1 (Drosophila)                | 185  | 182  | 178  |
| 232811 | Suv420h2 | suppressor of variegation 4-20 homolog 2 (Drosophila)                | 31   | 33   | 35   |
| 52615  | Suz12    | suppressor of zeste 12 homolog (Drosophila)                          | 158  | 165  | 158  |
| 20947  | Swap70   | SWA-70 protein                                                       | 628  | 637  | 633  |
| 20962  | Sycp3    | synaptonemal complex protein 3                                       | 160  | 166  | 164  |
| 68592  | Syf2     | SYF2 homolog, RNA splicing factor (S. cerevisiae)                    | 256  | 250  | 250  |
| 20963  | Sykb     | spleen tyrosine kinase                                               | 295  | 306  | 317  |
| 56403  | Syncrip  | synaptotagmin binding, cytoplasmic RNA interacting protein           | 139  | 148  | 138  |
| 104015 | Synj1    | synaptojanin 1                                                       | 141  | 138  | 135  |
| 20975  | Synj2    | synaptojanin 2                                                       | 348  | 352  | 344  |
| 74126  | Syvn1    | synovial apoptosis inhibitor 1, synoviolin                           | 52   | 60   | 53   |
| 20997  | T        | brachyury                                                            | 563  | 543  | 563  |
| 66724  | Tab3     | TGF-beta activated kinase 1/MAP3K7 binding protein 3                 | 641  | 635  | 629  |
| 27878  | Tada1    | transcriptional adaptor 1                                            | 196  | 189  | 199  |

|        |         |                                                                 |      |      |      |
|--------|---------|-----------------------------------------------------------------|------|------|------|
| 217031 | Tada2a  | transcriptional adaptor 2A                                      | 133  | 136  | 129  |
| 101206 | Tada3   | transcriptional adaptor 3                                       | 44   | 41   | 49   |
| 270627 | Taf1    | TAF1 RNA polymerase II, TATA box binding protein (TBP)-associa  | 256  | 252  | 230  |
| 24075  | Taf10   | TAF10 RNA polymerase II, TATA box binding protein (TBP)-associ  | 19   | 15   | 20   |
| 68776  | Taf11   | TAF11 RNA polymerase II, TATA box binding protein (TBP)-associ  | 65   | 68   | 70   |
| 66464  | Taf12   | TAF12 RNA polymerase II, TATA box binding protein (TBP)-associ  | 45   | 47   | 46   |
| 99730  | Taf13   | TAF13 RNA polymerase II, TATA box binding protein (TBP)-associ  | 39   | 38   | 38   |
| 21340  | Taf1b   | TATA box binding protein (Tbp)-associated factor, RNA polymeras | 2899 | 2901 | 2885 |
| 21341  | Taf1c   | TATA box binding protein (Tbp)-associated factor, RNA polymeras | 46   | 40   | 43   |
| 319944 | Taf2    | TAF2 RNA polymerase II, TATA box binding protein (TBP)-associa  | 220  | 220  | 215  |
| 209361 | Taf3    | TAF3 RNA polymerase II, TATA box binding protein (TBP)-associa  | 260  | 261  | 256  |
| 228980 | Taf4a   | TAF4A RNA polymerase II, TATA box binding protein (TBP)-assoc   | 693  | 672  | 693  |
| 72504  | Taf4b   | TAF4B RNA polymerase II, TATA box binding protein (TBP)-assoc   | 438  | 466  | 459  |
| 226182 | Taf5    | TAF5 RNA polymerase II, TATA box binding protein (TBP)-associa  | 47   | 47   | 50   |
| 102162 | Taf5l   | TAF5-like RNA polymerase II, p300/CBP-associated factor (PCAF)  | 49   | 55   | 50   |
| 21343  | Taf6    | TAF6 RNA polymerase II, TATA box binding protein (TBP)-associa  | 22   | 22   | 18   |
| 225895 | Taf6l   | TAF6-like RNA polymerase II, p300/CBP-associated factor (PCAF)  | 27   | 32   | 30   |
| 24074  | Taf7    | TAF7 RNA polymerase II, TATA box binding protein (TBP)-associa  | 28   | 33   | 33   |
| 74469  | Taf7l   | TAF7-like RNA polymerase II, TATA box binding protein (TBP)-ass | 163  | 171  | 159  |
| 63856  | Taf8    | TAF8 RNA polymerase II, TATA box binding protein (TBP)-associa  | 99   | 92   | 90   |
| 108143 | Taf9    | TAF9 RNA polymerase II, TATA box binding protein (TBP)-associa  | 24   | 25   | 23   |
| 407786 | Taf9b   | TAF9B RNA polymerase II, TATA box binding protein (TBP)-assoc   | 79   | 80   | 78   |
| 21349  | Tal1    | T-cell acute lymphocytic leukemia 1                             | 109  | 111  | 114  |
| 21350  | Tal2    | T-cell acute lymphocytic leukemia 2                             | 145  | 137  | 137  |
| 21351  | Taldo1  | transaldolase 1                                                 | 56   | 53   | 52   |
| 216965 | Taok1   | TAO kinase 1                                                    | 223  | 233  | 221  |
| 381921 | Taok2   | TAO kinase 2                                                    | 44   | 45   | 46   |
| 330177 | Taok3   | TAO kinase 3                                                    | 249  | 248  | 237  |
| 21354  | Tap1    | transporter 1, ATP-binding cassette, sub-family B (MDR/TAP)     | 13   | 14   | 10   |
| 21356  | Tapbp   | TAP binding protein                                             | 15   | 15   | 18   |
| 21357  | Tarbp2  | TAR (HIV) RNA binding protein 2                                 | 8    | 9    | 10   |
| 230908 | Tardbp  | TAR DNA binding protein                                         | 56   | 57   | 53   |
| 110960 | Tars    | threonyl-tRNA synthetase                                        | 1061 | 1069 | 1068 |
| 71807  | Tars2   | threonyl-tRNA synthetase 2, mitochondrial (putative)            | 105  | 109  | 105  |
| 272396 | Tarsl2  | threonyl-tRNA synthetase-like 2                                 | 419  | 411  | 406  |
| 75812  | Tasp1   | taspase, threonine aspartase 1                                  | 633  | 656  | 615  |
| 234724 | Tat     | tyrosine aminotransferase                                       | 100  | 99   | 101  |
| 66826  | Taz     | tafazzin                                                        | 18   | 18   | 17   |
| 67046  | Tbc1d7  | TBC1 domain family, member 7                                    | 233  | 232  | 238  |
| 72726  | Tbcc    | tubulin-specific chaperone C                                    | 102  | 98   | 99   |
| 108903 | Tbcd    | tubulin-specific chaperone d                                    | 112  | 110  | 110  |
| 70430  | Tbce    | tubulin-specific chaperone E                                    | 150  | 136  | 138  |
| 271981 | Tbck    | TBC1 domain containing kinase                                   | 344  | 329  | 330  |
| 56480  | Tbk1    | TANK-binding kinase 1                                           | 198  | 187  | 204  |
| 21372  | Tbl1x   | transducin (beta)-like 1 X-linked                               | 1333 | 1308 | 1292 |
| 81004  | Tbl1xr1 | transducin (beta)-like 1X-linked receptor 1                     | 2419 | 2431 | 2376 |
| 213773 | Tbl3    | transducin (beta)-like 3                                        | 29   | 31   | 29   |
| 21374  | Tbp     | TATA box binding protein                                        | 37   | 34   | 38   |
| 237336 | Tbpl1   | TATA box binding protein-like 1                                 | 201  | 212  | 220  |
| 227606 | Tbpl2   | TATA box binding protein like 2                                 | 134  | 140  | 126  |
| 21375  | Tbr1    | T-box brain gene 1                                              | 421  | 419  | 420  |
| 21376  | Tbrg1   | transforming growth factor beta regulated gene 1                | 73   | 67   | 72   |
| 21379  | Tbrg4   | transforming growth factor beta regulated gene 4                | 22   | 25   | 28   |
| 21380  | Tbx1    | T-box 1                                                         | 154  | 143  | 148  |
| 109575 | Tbx10   | T-box 10                                                        | 17   | 17   | 17   |

|           |          |                                                                       |      |      |      |
|-----------|----------|-----------------------------------------------------------------------|------|------|------|
| 21384     | Tbx15    | T-box 15                                                              | 944  | 945  | 941  |
| 76365     | Tbx18    | T-box18                                                               | 1358 | 1387 | 1347 |
| 83993     | Tbx19    | T-box 19                                                              | 339  | 329  | 333  |
| 21385     | Tbx2     | T-box 2                                                               | 691  | 693  | 698  |
| 57246     | Tbx20    | T-box 20                                                              | 585  | 596  | 582  |
| 57765     | Tbx21    | T-box 21                                                              | 125  | 118  | 128  |
| 245572    | Tbx22    | T-box 22                                                              | 338  | 323  | 318  |
| 21386     | Tbx3     | T-box 3                                                               | 1629 | 1603 | 1610 |
| 21387     | Tbx4     | T-box 4                                                               | 471  | 487  | 486  |
| 21388     | Tbx5     | T-box 5                                                               | 564  | 568  | 557  |
| 21389     | Tbx6     | T-box 6                                                               | 19   | 20   | 19   |
| 21391     | Tbxas1   | thromboxane A synthase 1, platelet                                    | 317  | 320  | 321  |
| 21399     | Tcea1    | transcription elongation factor A (SII) 1                             | 282  | 267  | 275  |
| 21400     | Tcea2    | transcription elongation factor A (SII), 2                            | 24   | 26   | 26   |
| 21401     | Tcea3    | transcription elongation factor A (SII), 3                            | 101  | 95   | 100  |
| 237052    | Tceal1   | transcription elongation factor A (SII)-like 1                        | 86   | 93   | 91   |
| 594844    | Tceal3   | transcription elongation factor A (SII)-like 3                        | 225  | 230  | 227  |
| 331532    | Tceal5   | transcription elongation factor A (SII)-like 5                        | 48   | 49   | 47   |
| 66104     | Tceal6   | transcription elongation factor A (SII)-like 6                        | 156  | 150  | 143  |
| 100040972 | Tceal7   | transcription elongation factor A (SII)-like 7                        | 38   | 35   | 33   |
| 66684     | Tceal8   | transcription elongation factor A (SII)-like 8                        | 77   | 80   | 80   |
| 245695    | Tceanc   | transcription elongation factor A (SII) N-terminal and central domain | 129  | 132  | 125  |
| 67923     | Tceb1    | transcription elongation factor B (SIII), polypeptide 1               | 52   | 49   | 54   |
| 67673     | Tceb2    | transcription elongation factor B (SIII), polypeptide 2               | 42   | 42   | 40   |
| 27224     | Tceb3    | transcription elongation factor B (SIII), polypeptide 3               | 94   | 81   | 83   |
| 56070     | Tceryg1  | transcription elongation regulator 1 (CA150)                          | 235  | 235  | 228  |
| 21406     | Tcf12    | transcription factor 12                                               | 648  | 633  | 625  |
| 21407     | Tcf15    | transcription factor 15                                               | 155  | 155  | 152  |
| 21411     | Tcf20    | transcription factor 20                                               | 147  | 156  | 143  |
| 21412     | Tcf21    | transcription factor 21                                               | 770  | 804  | 783  |
| 66855     | Tcf25    | transcription factor 25 (basic helix-loop-helix)                      | 96   | 95   | 98   |
| 21423     | Tcf3     | transcription factor 3                                                | 109  | 107  | 109  |
| 21413     | Tcf4     | transcription factor 4                                                | 1247 | 1245 | 1254 |
| 21414     | Tcf7     | transcription factor 7, T-cell specific                               | 166  | 166  | 162  |
| 21415     | Tcf7I1   | transcription factor 7-like 1 (T-cell specific, HMG box)              | 371  | 366  | 373  |
| 21416     | Tcf7I2   | transcription factor 7-like 2, T-cell specific, HMG-box               | 1443 | 1436 | 1442 |
| 21418     | Tcfap2a  | transcription factor AP-2, alpha                                      | 739  | 731  | 719  |
| 21419     | Tcfap2b  | transcription factor AP-2 beta                                        | 1952 | 1949 | 1931 |
| 21420     | Tcfap2c  | transcription factor AP-2, gamma                                      | 592  | 601  | 601  |
| 226896    | Tcfap2d  | transcription factor AP-2, delta                                      | 1178 | 1219 | 1187 |
| 332937    | Tcfap2e  | transcription factor AP-2, epsilon                                    | 104  | 97   | 99   |
| 83383     | Tcfap4   | transcription factor AP4                                              | 93   | 90   | 90   |
| 21422     | Tcfcp2   | transcription factor CP2                                              | 113  | 119  | 120  |
| 81879     | Tcfcp2I1 | transcription factor CP2-like 1                                       | 796  | 759  | 790  |
| 209446    | Tcfe3    | transcription factor E3                                               | 47   | 38   | 37   |
| 21425     | Tcfef    | transcription factor EB                                               | 198  | 182  | 193  |
| 21426     | Tcfec    | transcription factor EC                                               | 1696 | 1704 | 1666 |
| 21452     | Tcn2     | transcobalamin 2                                                      | 62   | 67   | 69   |
| 21453     | Tcof1    | Treacher Collins Franceschetti syndrome 1, homolog                    | 140  | 148  | 143  |
| 21454     | Tcp1     | t-complex protein 1                                                   | 8    | 9    | 6    |
| 21665     | Tdg      | thymine DNA glycosylase                                               | 11   | 10   | 10   |
| 21667     | Tdgf1    | teratocarcinoma-derived growth factor 1                               | 46   | 47   | 47   |
| 58865     | Tdh      | L-threonine dehydrogenase                                             | 144  | 149  | 138  |
| 56720     | Tdo2     | tryptophan 2,3-dioxygenase                                            | 83   | 80   | 75   |
| 104884    | Tdp1     | tyrosyl-DNA phosphodiesterase 1                                       | 108  | 109  | 103  |

|        |         |                                                        |      |      |      |
|--------|---------|--------------------------------------------------------|------|------|------|
| 56196  | Tdp2    | tyrosyl-DNA phosphodiesterase 2                        | 16   | 19   | 18   |
| 83561  | Tdrd1   | tudor domain containing 1                              | 84   | 79   | 80   |
| 219249 | Tdrd3   | tudor domain containing 3                              | 1675 | 1715 | 1655 |
| 214575 | Tdrd5   | tudor domain containing 5                              | 127  | 137  | 131  |
| 74691  | Tdrd9   | tudor domain containing 9                              | 19   | 21   | 19   |
| 21676  | Tead1   | TEA domain family member 1                             | 804  | 784  | 780  |
| 21677  | Tead2   | TEA domain family member 2                             | 35   | 34   | 33   |
| 21678  | Tead3   | TEA domain family member 3                             | 45   | 40   | 42   |
| 21679  | Tead4   | TEA domain family member 4                             | 282  | 276  | 273  |
| 21682  | Tec     | tec protein tyrosine kinase                            | 209  | 212  | 220  |
| 106529 | Tecr    | trans-2,3-enoyl-CoA reductase                          | 54   | 50   | 54   |
| 243078 | Tecrl   | trans-2,3-enoyl-CoA reductase-like                     | 1990 | 1999 | 1983 |
| 21685  | Tef     | thyrotroph embryonic factor                            | 153  | 157  | 155  |
| 21687  | Tek     | endothelial-specific receptor tyrosine kinase          | 335  | 325  | 324  |
| 209039 | Tenc1   | tensin like C1 domain-containing phosphatase           | 79   | 70   | 74   |
| 21745  | Tep1    | telomerase associated protein 1                        | 103  | 112  | 115  |
| 21748  | Terc    | telomerase RNA component                               | 195  | 193  | 180  |
| 21749  | Terf1   | telomeric repeat binding factor 1                      | 754  | 748  | 743  |
| 21750  | Terf2   | telomeric repeat binding factor 2                      | 100  | 115  | 111  |
| 57321  | Terf2ip | telomeric repeat binding factor 2, interacting protein | 717  | 728  | 700  |
| 21752  | Tert    | telomerase reverse transcriptase                       | 98   | 92   | 97   |
| 57816  | Tesc    | tescalcin                                              | 235  | 204  | 221  |
| 21754  | Tesk1   | testis specific protein kinase 1                       | 27   | 28   | 29   |
| 230661 | Tesk2   | testis-specific kinase 2                               | 135  | 128  | 126  |
| 52463  | Tet1    | tet oncogene 1                                         | 161  | 183  | 172  |
| 214133 | Tet2    | tet oncogene family member 2                           | 1191 | 1220 | 1188 |
| 194388 | Tet3    | tet oncogene family member 3                           | 112  | 122  | 114  |
| 56746  | Tex101  | testis expressed gene 101                              | 61   | 66   | 67   |
| 83558  | Tex11   | testis expressed gene 11                               | 372  | 367  | 354  |
| 83560  | Tex14   | testis expressed gene 14                               | 262  | 258  | 252  |
| 21780  | Tfam    | transcription factor A, mitochondrial                  | 134  | 138  | 131  |
| 224481 | Tfb1m   | transcription factor B1, mitochondrial                 | 213  | 214  | 209  |
| 15278  | Tfb2m   | transcription factor B2, mitochondrial                 | 42   | 36   | 41   |
| 21781  | Tfdp1   | transcription factor Dp 1                              | 144  | 142  | 139  |
| 211586 | Tfdp2   | transcription factor Dp 2                              | 402  | 393  | 408  |
| 54723  | Tfip11  | tuftelin interacting protein 11                        | 85   | 83   | 83   |
| 69714  | Tfpt    | TCF3 (E2A) fusion partner                              | 16   | 12   | 16   |
| 22042  | Tfr     | transferrin receptor                                   | 195  | 199  | 190  |
| 21819  | Tg      | thyroglobulin                                          | 299  | 310  | 296  |
| 76355  | Tgds    | TDP-glucose 4,6-dehydratase                            | 111  | 109  | 107  |
| 21802  | Tgfa    | transforming growth factor alpha                       | 375  | 365  | 377  |
| 21803  | Tgfb1   | transforming growth factor, beta 1                     | 46   | 39   | 43   |
| 21804  | Tgfb1i1 | transforming growth factor beta 1 induced transcript 1 | 33   | 33   | 30   |
| 21808  | Tgfb2   | transforming growth factor, beta 2                     | 811  | 793  | 817  |
| 21809  | Tgfb3   | transforming growth factor, beta 3                     | 333  | 326  | 348  |
| 21812  | Tgfr1   | transforming growth factor, beta receptor I            | 340  | 339  | 345  |
| 21813  | Tgfr2   | transforming growth factor, beta receptor II           | 1721 | 1747 | 1723 |
| 21814  | Tgfr3   | transforming growth factor, beta receptor III          | 473  | 468  | 464  |
| 21815  | Tgif1   | TGFB-induced factor homeobox 1                         | 576  | 563  | 575  |
| 228839 | Tgif2   | TGFB-induced factor homeobox 2                         | 113  | 104  | 110  |
| 21816  | Tgm1    | transglutaminase 1, K polypeptide                      | 52   | 53   | 57   |
| 21817  | Tgm2    | transglutaminase 2, C polypeptide                      | 210  | 212  | 214  |
| 21818  | Tgm3    | transglutaminase 3, E polypeptide                      | 395  | 393  | 372  |
| 331046 | Tgm4    | transglutaminase 4 (prostate)                          | 117  | 119  | 126  |
| 74176  | Tgm5    | transglutaminase 5                                     | 93   | 89   | 95   |

|        |          |                                                                          |      |      |      |
|--------|----------|--------------------------------------------------------------------------|------|------|------|
| 116940 | Tgs1     | trimethylguanosine synthase homolog ( <i>S. cerevisiae</i> )             | 137  | 129  | 134  |
| 21823  | Th       | tyrosine hydroxylase                                                     | 374  | 375  | 366  |
| 57314  | Th1l     | TH1-like homolog ( <i>Drosophila</i> )                                   | 137  | 141  | 140  |
| 73754  | Thap1    | THAP domain containing, apoptosis associated protein 1                   | 1079 | 1066 | 1095 |
| 59016  | Thap11   | THAP domain containing 11                                                | 11   | 8    | 10   |
| 69009  | Thap7    | THAP domain containing 7                                                 | 67   | 70   | 71   |
| 21825  | Thbs1    | thrombospondin 1                                                         | 1168 | 1184 | 1178 |
| 21828  | Thbs4    | thrombospondin 4                                                         | 299  | 304  | 299  |
| 66628  | Thg1l    | tRNA-histidine guanylyltransferase 1-like ( <i>S. cerevisiae</i> )       | 49   | 45   | 47   |
| 208967 | Thns1l   | threonine synthase-like 1 (bacterial)                                    | 204  | 209  | 202  |
| 232078 | Thns12   | threonine synthase-like 2 (bacterial)                                    | 307  | 320  | 309  |
| 225160 | Thoc1    | THO complex 1                                                            | 406  | 428  | 408  |
| 331401 | Thoc2    | THO complex 2                                                            | 799  | 814  | 772  |
| 73666  | Thoc3    | THO complex 3                                                            | 169  | 171  | 176  |
| 21681  | Thoc4    | THO complex 4                                                            | 20   | 19   | 20   |
| 107829 | Thoc5    | THO complex 5                                                            | 93   | 98   | 100  |
| 386612 | Thoc6    | THO complex 6 homolog ( <i>Drosophila</i> )                              | 4    | 4    | 6    |
| 66231  | Thoc7    | THO complex 7 homolog ( <i>Drosophila</i> )                              | 453  | 431  | 421  |
| 50492  | Thop1    | thimet oligopeptidase 1                                                  | 49   | 45   | 50   |
| 21833  | Thra     | thyroid hormone receptor alpha                                           | 56   | 50   | 53   |
| 230753 | Thrap3   | thyroid hormone receptor associated protein 3                            | 121  | 122  | 122  |
| 21834  | Thrb     | thyroid hormone receptor beta                                            | 2537 | 2560 | 2504 |
| 21835  | Thrsp    | thyroid hormone responsive SPOT14 homolog ( <i>Rattus</i> )              | 69   | 70   | 61   |
| 105663 | Thtpa    | thiamine triphosphatase                                                  | 20   | 21   | 18   |
| 72167  | Thumpd2  | THUMP domain containing 2                                                | 1017 | 1021 | 1022 |
| 14911  | Thumpd3  | THUMP domain containing 3                                                | 177  | 176  | 163  |
| 21841  | Tia1     | cytotoxic granule-associated RNA binding protein 1                       | 56   | 54   | 51   |
| 106759 | Ticam1   | toll-like receptor adaptor molecule 1                                    | 50   | 47   | 45   |
| 21846  | Tie1     | tyrosine kinase with immunoglobulin-like and EGF-like domains 1          | 87   | 91   | 92   |
| 21853  | Timeless | timeless homolog ( <i>Drosophila</i> )                                   | 48   | 43   | 50   |
| 66525  | Timm50   | translocase of inner mitochondrial membrane 50 homolog (yeast)           | 50   | 45   | 50   |
| 21857  | Timp1    | tissue inhibitor of metalloproteinase 1                                  | 85   | 85   | 89   |
| 21858  | Timp2    | tissue inhibitor of metalloproteinase 2                                  | 74   | 69   | 70   |
| 21859  | Timp3    | tissue inhibitor of metalloproteinase 3                                  | 522  | 512  | 510  |
| 94242  | Tinagl1  | tubulointerstitial nephritis antigen-like 1                              | 108  | 105  | 101  |
| 28113  | Tinf2    | Terf1 (TRF1)-interacting nuclear factor 2                                | 55   | 54   | 47   |
| 99929  | Tiparp   | TCDD-inducible poly(ADP-ribose) polymerase                               | 170  | 176  | 174  |
| 66131  | Tipin    | timeless interacting protein                                             | 114  | 120  | 111  |
| 117149 | Tirap    | toll-interleukin 1 receptor (TIR) domain-containing adaptor protein      | 46   | 45   | 44   |
| 21877  | Tk1      | thymidine kinase 1                                                       | 31   | 29   | 28   |
| 57813  | Tk2      | thymidine kinase 2, mitochondrial                                        | 104  | 102  | 100  |
| 21881  | Tkt      | transketolase                                                            | 171  | 169  | 178  |
| 83553  | Tktl1    | transketolase-like 1                                                     | 98   | 97   | 92   |
| 74419  | Tktl2    | transketolase-like 2                                                     | 260  | 264  | 263  |
| 21885  | Tle1     | transducin-like enhancer of split 1, homolog of <i>Drosophila</i> E(spl) | 2134 | 2105 | 2082 |
| 21886  | Tle2     | transducin-like enhancer of split 2, homolog of <i>Drosophila</i> E(spl) | 51   | 49   | 41   |
| 21887  | Tle3     | transducin-like enhancer of split 3, homolog of <i>Drosophila</i> E(spl) | 1446 | 1441 | 1468 |
| 21888  | Tle4     | transducin-like enhancer of split 4, homolog of <i>Drosophila</i> E(spl) | 2567 | 2567 | 2515 |
| 228012 | Tlk1     | tousled-like kinase 1                                                    | 453  | 460  | 456  |
| 24086  | Tlk2     | tousled-like kinase 2 ( <i>Arabidopsis</i> )                             | 147  | 142  | 148  |
| 21892  | Tll1     | tolloid-like                                                             | 693  | 691  | 692  |
| 24087  | Tll2     | tolloid-like 2                                                           | 246  | 233  | 238  |
| 21897  | Tlr1     | toll-like receptor 1                                                     | 199  | 200  | 214  |
| 24088  | Tlr2     | toll-like receptor 2                                                     | 354  | 358  | 343  |
| 142980 | Tlr3     | toll-like receptor 3                                                     | 160  | 163  | 155  |

|        |             |                                                                   |      |      |      |
|--------|-------------|-------------------------------------------------------------------|------|------|------|
| 21898  | Tlr4        | toll-like receptor 4                                              | 3210 | 3232 | 3193 |
| 21899  | Tlr6        | toll-like receptor 6                                              | 45   | 52   | 50   |
| 170743 | Tlr7        | toll-like receptor 7                                              | 146  | 149  | 147  |
| 170744 | Tlr8        | toll-like receptor 8                                              | 153  | 152  | 145  |
| 81897  | Tlr9        | toll-like receptor 9                                              | 51   | 54   | 55   |
| 21908  | Tlx1        | T-cell leukemia, homeobox 1                                       | 204  | 202  | 191  |
| 21909  | Tlx2        | T-cell leukemia, homeobox 2                                       | 23   | 24   | 20   |
| 73166  | Tm7sf2      | transmembrane 7 superfamily member 2                              | 17   | 16   | 22   |
| 74140  | Tm9sf1      | transmembrane 9 superfamily member 1                              | 16   | 18   | 16   |
| 68581  | Tmed10      | transmembrane emp24-like trafficking protein 10 (yeast)           | 179  | 172  | 170  |
| 56334  | Tmed2       | transmembrane emp24 domain trafficking protein 2                  | 28   | 26   | 24   |
| 66154  | Tmem14c     | transmembrane protein 14C                                         | 87   | 86   | 91   |
| 234371 | Tmem161a    | transmembrane protein 161A                                        | 75   | 70   | 70   |
| 72512  | Tmem173     | transmembrane protein 173                                         | 64   | 61   | 56   |
| 57394  | Tmem27      | transmembrane protein 27                                          | 81   | 81   | 70   |
| 329795 | Tmem67      | transmembrane protein 67                                          | 160  | 161  | 157  |
| 72098  | Tmem68      | transmembrane protein 68                                          | 503  | 512  | 499  |
| 239408 | Tmem74      | transmembrane protein 74                                          | 901  | 936  | 906  |
| 68255  | Tmem86b     | transmembrane protein 86B                                         | 72   | 73   | 74   |
| 232286 | Tmf1        | TATA element modulatory factor 1                                  | 74   | 72   | 69   |
| 194597 | Tmprss11a   | transmembrane protease, serine 11a                                | 178  | 186  | 184  |
| 319875 | Tmprss11bnl | transmembrane protease, serine 11b N terminal like                | 139  | 152  | 145  |
| 435845 | Tmprss11c   | transmembrane protease, serine 11c                                | 236  | 232  | 224  |
| 231382 | Tmprss11d   | transmembrane protease, serine 11d                                | 230  | 237  | 217  |
| 243084 | Tmprss11e   | transmembrane protease, serine 11e                                | 158  | 178  | 154  |
| 243083 | Tmprss11f   | transmembrane protease, serine 11f                                | 203  | 191  | 197  |
| 75002  | Tmprss12    | transmembrane (C-terminal) protease, serine 12                    | 106  | 107  | 107  |
| 214531 | Tmprss13    | transmembrane protease, serine 13                                 | 134  | 126  | 127  |
| 19146  | Tmprss15    | transmembrane protease, serine 15                                 | 2816 | 2872 | 2789 |
| 50528  | Tmprss2     | transmembrane protease, serine 2                                  | 293  | 308  | 297  |
| 140765 | Tmprss3     | transmembrane protease, serine 3                                  | 58   | 61   | 58   |
| 214523 | Tmprss4     | transmembrane protease, serine 4                                  | 91   | 103  | 97   |
| 80893  | Tmprss5     | transmembrane protease, serine 5 (spinesin)                       | 254  | 242  | 250  |
| 71753  | Tmprss6     | transmembrane serine protease 6                                   | 84   | 84   | 82   |
| 208171 | Tmprss7     | transmembrane serine protease 7                                   | 86   | 96   | 89   |
| 432478 | Tmprss9     | transmembrane protease, serine 9                                  | 58   | 54   | 57   |
| 19241  | Tmsb4x      | thymosin, beta 4, X chromosome                                    | 230  | 223  | 235  |
| 72736  | Tmx1        | thioredoxin-related transmembrane protein 1                       | 600  | 607  | 619  |
| 67988  | Tmx3        | thioredoxin-related transmembrane protein 3                       | 1156 | 1184 | 1152 |
| 52837  | Tmx4        | thioredoxin-related transmembrane protein 4                       | 281  | 298  | 278  |
| 21923  | Tnc         | tenascin C                                                        | 1619 | 1607 | 1620 |
| 21926  | Tnf         | tumor necrosis factor                                             | 14   | 13   | 12   |
| 21927  | Tnfaip1     | tumor necrosis factor, alpha-induced protein 1 (endothelial)      | 33   | 29   | 31   |
| 21929  | Tnfaip3     | tumor necrosis factor, alpha-induced protein 3                    | 405  | 392  | 380  |
| 72049  | Tnfrsf13c   | tumor necrosis factor receptor superfamily, member 13c            | 62   | 51   | 56   |
| 230979 | Tnfrsf14    | tumor necrosis factor receptor superfamily, member 14 (herpesviru | 81   | 83   | 81   |
| 21937  | Tnfrsf1a    | tumor necrosis factor receptor superfamily, member 1a             | 75   | 72   | 72   |
| 22163  | Tnfrsf4     | tumor necrosis factor receptor superfamily, member 4              | 45   | 46   | 48   |
| 21941  | Tnfrsf8     | tumor necrosis factor receptor superfamily, member 8              | 274  | 284  | 269  |
| 21943  | Tnfsf11     | tumor necrosis factor (ligand) superfamily, member 11             | 147  | 148  | 146  |
| 69583  | Tnfsf13     | tumor necrosis factor (ligand) superfamily, member 13             | 17   | 17   | 17   |
| 24099  | Tnfsf13b    | tumor necrosis factor (ligand) superfamily, member 13b            | 239  | 239  | 226  |
| 326623 | Tnfsf15     | tumor necrosis factor (ligand) superfamily, member 15             | 310  | 317  | 310  |
| 22164  | Tnfsf4      | tumor necrosis factor (ligand) superfamily, member 4              | 314  | 313  | 302  |
| 665113 | Tnik        | TRAF2 and NCK interacting kinase                                  | 917  | 921  | 912  |

|        |          |                                                                  |      |      |      |
|--------|----------|------------------------------------------------------------------|------|------|------|
| 57783  | Tnip1    | TNFAIP3 interacting protein 1                                    | 175  | 180  | 183  |
| 83813  | Tnk1     | tyrosine kinase, non-receptor, 1                                 | 45   | 39   | 43   |
| 51789  | Tnk2     | tyrosine kinase, non-receptor, 2                                 | 77   | 76   | 78   |
| 21951  | Tnks     | tankyrase, TRF1-interacting ankyrin-related ADP-ribose polymeras | 733  | 734  | 723  |
| 74493  | Tnks2    | tankyrase, TRF1-interacting ankyrin-related ADP-ribose polymeras | 237  | 247  | 238  |
| 21953  | Tnni2    | troponin I, skeletal, fast 2                                     | 32   | 35   | 34   |
| 435766 | Tnni3k   | TNNI3 interacting kinase                                         | 494  | 502  | 473  |
| 21956  | Tnnt2    | troponin T2, cardiac                                             | 138  | 139  | 128  |
| 21958  | Tnp1     | transition protein 1                                             | 181  | 180  | 179  |
| 233833 | Tnrc6a   | trinucleotide repeat containing 6a                               | 316  | 316  | 315  |
| 213988 | Tnrc6b   | trinucleotide repeat containing 6b                               | 473  | 472  | 474  |
| 217351 | Tnrc6c   | trinucleotide repeat containing 6C                               | 214  | 222  | 215  |
| 81877  | Tnxb     | tenascin XB                                                      | 112  | 110  | 124  |
| 54473  | Tollip   | toll interacting protein                                         | 138  | 145  | 141  |
| 791260 | Tomt     | transmembrane O-methyltransferase                                | 20   | 21   | 21   |
| 72749  | Tonsl    | tonsoku-like, DNA repair protein                                 | 46   | 40   | 41   |
| 21969  | Top1     | topoisomerase (DNA) I                                            | 457  | 478  | 472  |
| 72960  | Top1mt   | DNA topoisomerase 1, mitochondrial                               | 107  | 112  | 109  |
| 21973  | Top2a    | topoisomerase (DNA) II alpha                                     | 79   | 72   | 86   |
| 21974  | Top2b    | topoisomerase (DNA) II beta                                      | 409  | 419  | 408  |
| 21975  | Top3a    | topoisomerase (DNA) III alpha                                    | 70   | 66   | 70   |
| 21976  | Top3b    | topoisomerase (DNA) III beta                                     | 33   | 36   | 34   |
| 235559 | Topbp1   | topoisomerase (DNA) II binding protein 1                         | 101  | 98   | 93   |
| 106021 | Topors   | topoisomerase I binding, arginine/serine-rich                    | 48   | 44   | 50   |
| 30931  | Tor1a    | torsin family 1, member A (torsin A)                             | 37   | 38   | 38   |
| 30934  | Tor1b    | torsin family 1, member B                                        | 86   | 83   | 81   |
| 30933  | Tor2a    | torsin family 2, member A                                        | 66   | 63   | 62   |
| 30935  | Tor3a    | torsin family 3, member A                                        | 207  | 205  | 203  |
| 269389 | Tox2     | TOX high mobility group box family member 2                      | 399  | 401  | 397  |
| 244579 | Tox3     | TOX high mobility group box family member 3                      | 2306 | 2344 | 2289 |
| 21987  | Tpd5211  | tumor protein D52-like 1                                         | 241  | 238  | 249  |
| 21990  | Tph1     | tryptophan hydroxylase 1                                         | 102  | 110  | 104  |
| 216343 | Tph2     | tryptophan hydroxylase 2                                         | 590  | 585  | 588  |
| 21991  | Tpi1     | triosephosphate isomerase 1                                      | 24   | 28   | 24   |
| 29807  | Tpk1     | thiamine pyrophosphokinase                                       | 2192 | 2238 | 2193 |
| 22017  | Tpmt     | thiopurine methyltransferase                                     | 35   | 31   | 37   |
| 22018  | Tpo      | thyroid peroxidase                                               | 570  | 553  | 560  |
| 12751  | Tpp1     | tripeptidyl peptidase I                                          | 56   | 54   | 52   |
| 22019  | Tpp2     | tripeptidyl peptidase II                                         | 248  | 253  | 238  |
| 17229  | Tpsb2    | tryptase beta 2                                                  | 30   | 26   | 31   |
| 26945  | Tpsg1    | tryptase gamma 1                                                 | 80   | 87   | 81   |
| 101214 | Tra2a    | transformer 2 alpha homolog (Drosophila)                         | 134  | 134  | 130  |
| 20462  | Tra2b    | transformer 2 beta homolog (Drosophila)                          | 356  | 352  | 363  |
| 22030  | Traf2    | TNF receptor-associated factor 2                                 | 76   | 76   | 72   |
| 22031  | Traf3    | TNF receptor-associated factor 3                                 | 306  | 285  | 309  |
| 74019  | Traf3ip1 | TRAF3 interacting protein 1                                      | 101  | 97   | 105  |
| 22032  | Traf4    | TNF receptor associated factor 4                                 | 108  | 100  | 103  |
| 22033  | Traf5    | TNF receptor-associated factor 5                                 | 162  | 156  | 160  |
| 22034  | Traf6    | TNF receptor-associated factor 6                                 | 197  | 194  | 197  |
| 224619 | Traf7    | TNF receptor-associated factor 7                                 | 56   | 58   | 53   |
| 70827  | Trak2    | trafficking protein, kinesin binding 2                           | 223  | 227  | 218  |
| 170829 | Tram2    | translocating chain-associating membrane protein 2               | 336  | 343  | 337  |
| 68015  | Trap1    | TNF receptor-associated protein 1                                | 227  | 228  | 225  |
| 60409  | Trappc4  | trafficking protein particle complex 4                           | 13   | 11   | 9    |
| 77647  | Trat1    | T cell receptor associated transmembrane adaptor 1               | 490  | 486  | 490  |

|        |          |                                                                    |      |      |      |
|--------|----------|--------------------------------------------------------------------|------|------|------|
| 13434  | Trdmt1   | tRNA aspartic acid methyltransferase 1                             | 109  | 102  | 101  |
| 58866  | Treh     | trehalase (brush-border membrane glycoprotein)                     | 170  | 160  | 163  |
| 224829 | Trerf1   | transcriptional regulating factor 1                                | 578  | 548  | 564  |
| 22040  | Trex1    | three prime repair exonuclease 1                                   | 30   | 23   | 25   |
| 24102  | Trex2    | three prime repair exonuclease 2                                   | 56   | 58   | 53   |
| 50765  | Trfr2    | transferrin receptor 2                                             | 58   | 61   | 60   |
| 237553 | Trhde    | TRH-degrading enzyme                                               | 2789 | 2858 | 2790 |
| 211770 | Trib1    | tribbles homolog 1 (Drosophila)                                    | 825  | 821  | 827  |
| 217410 | Trib2    | tribbles homolog 2 (Drosophila)                                    | 3083 | 3151 | 3065 |
| 228775 | Trib3    | tribbles homolog 3 (Drosophila)                                    | 12   | 13   | 15   |
| 66597  | Trim13   | tripartite motif-containing 13                                     | 72   | 69   | 70   |
| 94092  | Trim16   | tripartite motif-containing 16                                     | 71   | 76   | 72   |
| 56631  | Trim17   | tripartite motif-containing 17                                     | 32   | 26   | 30   |
| 80890  | Trim2    | tripartite motif-containing 2                                      | 390  | 381  | 396  |
| 20821  | Trim21   | tripartite motif-containing 21                                     | 29   | 29   | 29   |
| 81003  | Trim23   | tripartite motif-containing 23                                     | 65   | 66   | 68   |
| 21848  | Trim24   | tripartite motif-containing 24                                     | 683  | 676  | 669  |
| 19720  | Trim27   | tripartite motif-containing 27                                     | 192  | 191  | 197  |
| 21849  | Trim28   | tripartite motif-containing 28                                     | 29   | 30   | 30   |
| 20128  | Trim30a  | tripartite motif-containing 30A                                    | 183  | 186  | 195  |
| 69807  | Trim32   | tripartite motif-containing 32                                     | 1639 | 1657 | 1635 |
| 94093  | Trim33   | tripartite motif-containing 33                                     | 520  | 534  | 523  |
| 384309 | Trim56   | tripartite motif-containing 56                                     | 165  | 164  | 167  |
| 433766 | Trim63   | tripartite motif-containing 63                                     | 72   | 70   | 68   |
| 330627 | Trim66   | tripartite motif-containing 66                                     | 121  | 123  | 131  |
| 101700 | Trim68   | tripartite motif-containing 68                                     | 36   | 43   | 35   |
| 94090  | Trim9    | tripartite motif-containing 9                                      | 288  | 297  | 279  |
| 223435 | Trio     | triple functional domain (PTPRF interacting)                       | 665  | 664  | 654  |
| 14897  | Trip12   | thyroid hormone receptor interactor 12                             | 180  | 185  | 189  |
| 69716  | Trip13   | thyroid hormone receptor interactor 13                             | 115  | 108  | 111  |
| 56404  | Trip4    | thyroid hormone receptor interactor 4                              | 108  | 106  | 105  |
| 22051  | Trip6    | thyroid hormone receptor interactor 6                              | 35   | 35   | 31   |
| 66966  | Trit1    | tRNA isopentenyltransferase 1                                      | 139  | 151  | 144  |
| 212528 | Trmt1    | TRM1 tRNA methyltransferase 1 homolog (S. cerevisiae)              | 20   | 16   | 18   |
| 73681  | Trmt11   | tRNA methyltransferase 11 homolog (S. cerevisiae)                  | 527  | 529  | 533  |
| 67674  | Trmt112  | tRNA methyltransferase 11-2 homolog (S. cerevisiae)                | 14   | 15   | 16   |
| 68260  | Trmt12   | tRNA methyltransferase 12 homolog (S. cerevisiae)                  | 87   | 85   | 81   |
| 215201 | Trmt2b   | TRM2 tRNA methyltransferase 2 homolog B (S. cerevisiae)            | 136  | 136  | 128  |
| 76357  | Trmt5    | TRM5 tRNA methyltransferase 5 homolog (S. cerevisiae)              | 211  | 216  | 203  |
| 66926  | Trmt6    | tRNA methyltransferase 6 homolog (S. cerevisiae)                   | 41   | 38   | 48   |
| 328162 | Trmt61a  | tRNA methyltransferase 61 homolog A (S. cerevisiae)                | 52   | 51   | 54   |
| 72026  | Trmu     | tRNA 5-methylaminomethyl-2-thiouridylate methyltransferase         | 229  | 219  | 228  |
| 71787  | Trnau1ap | tRNA selenocysteine 1 associated protein 1                         | 42   | 52   | 41   |
| 70047  | Trmt1    | tRNA nucleotidyl transferase, CCA-adding, 1                        | 61   | 61   | 62   |
| 22059  | Trp53    | transformation related protein 53                                  | 34   | 35   | 31   |
| 27223  | Trp53bp1 | transformation related protein 53 binding protein 1                | 159  | 153  | 163  |
| 76367  | Trp53rk  | transformation related protein 53 regulating kinase                | 117  | 118  | 115  |
| 22061  | Trp63    | transformation related protein 63                                  | 1207 | 1191 | 1173 |
| 22062  | Trp73    | transformation related protein 73                                  | 176  | 183  | 169  |
| 22064  | Trpc2    | transient receptor potential cation channel, subfamily C, member 2 | 67   | 70   | 66   |
| 56407  | Trpc4ap  | transient receptor potential cation channel, subfamily C, member 4 | 143  | 135  | 134  |
| 68667  | Trpm4    | transient receptor potential cation channel, subfamily M, member 4 | 68   | 63   | 60   |
| 225997 | Trpm6    | transient receptor potential cation channel, subfamily M, member 6 | 381  | 379  | 370  |
| 58800  | Trpm7    | transient receptor potential cation channel, subfamily M, member 7 | 193  | 185  | 183  |
| 83925  | Trps1    | trichorhinophalangeal syndrome I (human)                           | 1205 | 1247 | 1219 |

|           |         |                                                                    |      |      |      |
|-----------|---------|--------------------------------------------------------------------|------|------|------|
| 107328    | Trpt1   | tRNA phosphotransferase 1                                          | 28   | 29   | 28   |
| 193034    | Trpv1   | transient receptor potential cation channel, subfamily V, member 1 | 85   | 91   | 87   |
| 100683    | Trrap   | transformation/transcription domain-associated protein             | 280  | 262  | 263  |
| 72133     | Trub1   | TruB pseudouridine (psi) synthase homolog 1 (E. coli)              | 323  | 328  | 329  |
| 227682    | Trub2   | TruB pseudouridine (psi) synthase homolog 2 (E. coli)              | 36   | 35   | 34   |
| 436522    | Try10   | trypsin 10                                                         | 88   | 78   | 70   |
| 22074     | Try4    | trypsin 4                                                          | 355  | 359  | 343  |
| 103964    | Try5    | trypsin 5                                                          | 69   | 68   | 67   |
| 64930     | Tsc1    | tuberous sclerosis 1                                               | 99   | 98   | 95   |
| 21807     | Tsc22d1 | TSC22 domain family, member 1                                      | 670  | 691  | 696  |
| 14605     | Tsc22d3 | TSC22 domain family, member 3                                      | 340  | 331  | 314  |
| 78829     | Tsc22d4 | TSC22 domain family, member 4                                      | 46   | 46   | 47   |
| 66637     | Tsen15  | tRNA splicing endonuclease 15 homolog (S. cerevisiae)              | 389  | 399  | 398  |
| 381802    | Tsen2   | tRNA splicing endonuclease 2 homolog (S. cerevisiae)               | 224  | 222  | 218  |
| 66078     | Tsen34  | tRNA splicing endonuclease 34 homolog (S. cerevisiae)              | 15   | 10   | 14   |
| 76265     | Tsen54  | tRNA splicing endonuclease 54 homolog (S. cerevisiae)              | 12   | 12   | 14   |
| 66399     | Tsfm    | Ts translation elongation factor, mitochondrial                    | 53   | 52   | 55   |
| 22088     | Tsg101  | tumor susceptibility gene 101                                      | 125  | 125  | 130  |
| 110796    | Tshz1   | teashirt zinc finger family member 1                               | 1494 | 1510 | 1492 |
| 228911    | Tshz2   | teashirt zinc finger family member 2                               | 1448 | 1436 | 1451 |
| 243931    | Tshz3   | teashirt zinc finger family member 3                               | 2506 | 2524 | 2480 |
| 22097     | Tsix    | X (inactive)-specific transcript, antisense                        | 81   | 85   | 82   |
| 22116     | Tsks    | testis-specific serine kinase substrate                            | 60   | 49   | 60   |
| 12257     | Tspo    | translocator protein                                               | 55   | 48   | 47   |
| 22110     | Tspyl1  | testis-specific protein, Y-encoded-like 1                          | 109  | 109  | 119  |
| 52808     | Tspyl2  | TSPY-like 2                                                        | 158  | 159  | 159  |
| 72480     | Tspyl4  | TSPY-like 4                                                        | 139  | 137  | 140  |
| 239364    | Tspyl5  | testis-specific protein, Y-encoded-like 5                          | 858  | 849  | 840  |
| 69499     | Tsr2    | TSR2, 20S rRNA accumulation, homolog (S. cerevisiae)               | 352  | 351  | 357  |
| 22114     | Tssk1   | testis-specific serine kinase 1                                    | 8    | 9    | 10   |
| 22115     | Tssk2   | testis-specific serine kinase 2                                    | 20   | 19   | 25   |
| 58864     | Tssk3   | testis-specific serine kinase 3                                    | 35   | 38   | 42   |
| 71099     | Tssk4   | testis-specific serine kinase 4                                    | 24   | 22   | 23   |
| 73542     | Tssk5   | testis-specific serine kinase 5                                    | 15   | 11   | 15   |
| 83984     | Tssk6   | testis-specific serine kinase 6                                    | 18   | 19   | 21   |
| 22122     | Tsta3   | tissue specific transplantation antigen P35B                       | 23   | 23   | 26   |
| 106763    | Ttbk1   | tau tubulin kinase 1                                               | 73   | 74   | 68   |
| 140810    | Ttbk2   | tau tubulin kinase 2                                               | 307  | 317  | 301  |
| 219022    | Ttc5    | tetratricopeptide repeat domain 5                                  | 67   | 64   | 69   |
| 22130     | Ttf1    | transcription termination factor, RNA polymerase I                 | 92   | 91   | 94   |
| 74044     | Ttf2    | transcription termination factor, RNA polymerase II                | 127  | 128  | 128  |
| 22137     | Ttk     | Ttk protein kinase                                                 | 193  | 188  | 181  |
| 69737     | Ttl     | tubulin tyrosine ligase                                            | 172  | 175  | 174  |
| 319953    | Ttl1    | tubulin tyrosine ligase-like 1                                     | 80   | 76   | 78   |
| 330010    | Ttl10   | tubulin tyrosine ligase-like family, member 10                     | 40   | 33   | 36   |
| 74410     | Ttl11   | tubulin tyrosine ligase-like family, member 11                     | 470  | 461  | 450  |
| 223723    | Ttl12   | tubulin tyrosine ligase-like family, member 12                     | 202  | 208  | 192  |
| 269954    | Ttl13   | tubulin tyrosine ligase-like family, member 13                     | 34   | 34   | 32   |
| 100216474 | Ttl2    | tubulin tyrosine ligase-like family, member 2                      | 85   | 83   | 77   |
| 101100    | Ttl3    | tubulin tyrosine ligase-like family, member 3                      | 62   | 55   | 57   |
| 67534     | Ttl4    | tubulin tyrosine ligase-like family, member 4                      | 141  | 147  | 142  |
| 320244    | Ttl5    | tubulin tyrosine ligase-like family, member 5                      | 321  | 338  | 335  |
| 237930    | Ttl6    | tubulin tyrosine ligase-like family, member 6                      | 109  | 108  | 109  |
| 70892     | Ttl7    | tubulin tyrosine ligase-like family, member 7                      | 2770 | 2750 | 2724 |
| 239591    | Ttl8    | tubulin tyrosine ligase-like family, member 8                      | 152  | 149  | 151  |

|        |         |                                                          |      |      |      |
|--------|---------|----------------------------------------------------------|------|------|------|
| 74711  | Ttll9   | tubulin tyrosine ligase-like family, member 9            | 80   | 82   | 85   |
| 22138  | Ttn     | titin                                                    | 621  | 655  | 636  |
| 50500  | Ttpa    | tocopherol (alpha) transfer protein                      | 153  | 152  | 153  |
| 22141  | Tub     | tubby candidate gene                                     | 184  | 190  | 197  |
| 22142  | Tuba1a  | tubulin, alpha 1A                                        | 122  | 129  | 125  |
| 22143  | Tuba1b  | tubulin, alpha 1B                                        | 46   | 50   | 47   |
| 22146  | Tuba1c  | tubulin, alpha 1C                                        | 136  | 140  | 137  |
| 22145  | Tuba4a  | tubulin, alpha 4A                                        | 31   | 30   | 34   |
| 53857  | Tuba8   | tubulin, alpha 8                                         | 76   | 83   | 79   |
| 238463 | Tubal3  | tubulin, alpha-like 3                                    | 38   | 36   | 36   |
| 545486 | Tubb1   | tubulin, beta 1                                          | 32   | 33   | 30   |
| 22151  | Tubb2a  | tubulin, beta 2A                                         | 124  | 115  | 117  |
| 73710  | Tubb2b  | tubulin, beta 2B                                         | 109  | 108  | 111  |
| 227613 | Tubb2c  | tubulin, beta 2C                                         | 20   | 17   | 19   |
| 22152  | Tubb3   | tubulin, beta 3                                          | 46   | 48   | 47   |
| 22153  | Tubb4   | tubulin, beta 4                                          | 35   | 29   | 36   |
| 22154  | Tubb5   | tubulin, beta 5                                          | 22   | 21   | 22   |
| 67951  | Tubb6   | tubulin, beta 6                                          | 136  | 140  | 135  |
| 56427  | Tubd1   | tubulin, delta 1                                         | 50   | 50   | 51   |
| 71924  | Tube1   | epsilon-tubulin 1                                        | 39   | 36   | 35   |
| 103733 | Tubg1   | tubulin, gamma 1                                         | 45   | 43   | 44   |
| 103768 | Tubg2   | tubulin, gamma 2                                         | 70   | 70   | 70   |
| 233870 | Tufm    | Tu translation elongation factor, mitochondrial          | 33   | 33   | 34   |
| 56734  | Tulp2   | tubby-like protein 2                                     | 21   | 20   | 19   |
| 70044  | Tut1    | terminal uridylyl transferase 1, U6 snRNA-specific       | 30   | 29   | 34   |
| 19230  | Twf1    | twinfilin, actin-binding protein, homolog 1 (Drosophila) | 106  | 112  | 104  |
| 22160  | Twist1  | twist homolog 1 (Drosophila)                             | 753  | 765  | 753  |
| 13345  | Twist2  | twist homolog 2 (Drosophila)                             | 780  | 781  | 776  |
| 28071  | Twistnb | TWIST neighbor                                           | 677  | 691  | 660  |
| 22165  | Txk     | TXK tyrosine kinase                                      | 306  | 308  | 305  |
| 353170 | Txlng   | taxilin gamma                                            | 152  | 146  | 143  |
| 22166  | Txn1    | thioredoxin 1                                            | 125  | 124  | 120  |
| 56551  | Txn2    | thioredoxin 2                                            | 148  | 153  | 147  |
| 66073  | Txndc12 | thioredoxin domain containing 12 (endoplasmic reticulum) | 19   | 22   | 19   |
| 52700  | Txndc17 | thioredoxin domain containing 17                         | 11   | 16   | 11   |
| 213272 | Txndc2  | thioredoxin domain containing 2 (spermatzoa)             | 216  | 214  | 206  |
| 73412  | Txndc3  | thioredoxin domain containing 3 (spermatzoa)             | 132  | 139  | 135  |
| 105245 | Txndc5  | thioredoxin domain containing 5                          | 364  | 366  | 363  |
| 67402  | Txndc8  | thioredoxin domain containing 8                          | 318  | 321  | 322  |
| 56338  | Txnip   | thioredoxin interacting protein                          | 96   | 93   | 87   |
| 53382  | Txn1l   | thioredoxin-like 1                                       | 400  | 408  | 404  |
| 234723 | Txn1l4b | thioredoxin-like 4B                                      | 21   | 18   | 18   |
| 50493  | Txnrd1  | thioredoxin reductase 1                                  | 107  | 102  | 107  |
| 26462  | Txnrd2  | thioredoxin reductase 2                                  | 16   | 15   | 18   |
| 232223 | Txnrd3  | thioredoxin reductase 3                                  | 144  | 157  | 155  |
| 54721  | Tyk2    | tyrosine kinase 2                                        | 73   | 70   | 78   |
| 72962  | Tymp    | thymidine phosphorylase                                  | 6    | 4    | 5    |
| 22171  | Tyms    | thymidylate synthase                                     | 124  | 121  | 122  |
| 22173  | Tyr     | tyrosinase                                               | 406  | 427  | 399  |
| 22174  | Tyro3   | TYRO3 protein tyrosine kinase 3                          | 137  | 136  | 140  |
| 22177  | Tyrobp  | TYRO protein tyrosine kinase binding protein             | 73   | 78   | 75   |
| 22178  | Tyrp1   | tyrosinase-related protein 1                             | 5346 | 5447 | 5275 |
| 71767  | Tysnd1  | trypsin domain containing 1                              | 41   | 42   | 44   |
| 100929 | Tyw1    | tRNA-yW synthesizing protein 1 homolog (S. cerevisiae)   | 149  | 151  | 145  |
| 209584 | Tyw3    | tRNA-yW synthesizing protein 3 homolog (S. cerevisiae)   | 150  | 153  | 145  |

|        |         |                                                                |      |      |      |
|--------|---------|----------------------------------------------------------------|------|------|------|
| 108121 | U2af1   | U2 small nuclear ribonucleoprotein auxiliary factor (U2AF) 1   | 53   | 56   | 57   |
| 233073 | U2af1l4 | U2 small nuclear RNA auxiliary factor 1-like 4                 | 3    | 2    | 2    |
| 22185  | U2af2   | U2 small nuclear ribonucleoprotein auxiliary factor (U2AF) 2   | 27   | 25   | 24   |
| 107652 | Uap1    | UDP-N-acetylglucosamine pyrophosphorylase 1                    | 155  | 152  | 163  |
| 227620 | Uap1l1  | UDP-N-acteylglucosamine pyrophosphorylase 1-like 1             | 19   | 19   | 18   |
| 22201  | Uba1    | ubiquitin-like modifier activating enzyme 1                    | 91   | 89   | 88   |
| 50995  | Uba2    | ubiquitin-like modifier activating enzyme 2                    | 87   | 77   | 83   |
| 22200  | Uba3    | ubiquitin-like modifier activating enzyme 3                    | 37   | 39   | 39   |
| 66663  | Uba5    | ubiquitin-like modifier activating enzyme 5                    | 79   | 75   | 72   |
| 231380 | Uba6    | ubiquitin-like modifier activating enzyme 6                    | 157  | 159  | 150  |
| 74153  | Uba7    | ubiquitin-like modifier activating enzyme 7                    | 43   | 42   | 39   |
| 72828  | Ubash3b | ubiquitin associated and SH3 domain containing, B              | 683  | 664  | 667  |
| 24108  | Ubd     | ubiquitin D                                                    | 63   | 60   | 62   |
| 22202  | Ube1y1  | ubiquitin-activating enzyme E1, Chr Y 1                        | 122  | 124  | 118  |
| 22209  | Ube2a   | ubiquitin-conjugating enzyme E2A, RAD6 homolog (S. cerevisiae) | 45   | 52   | 40   |
| 22210  | Ube2b   | ubiquitin-conjugating enzyme E2B, RAD6 homolog (S. cerevisiae) | 49   | 44   | 51   |
| 68612  | Ube2c   | ubiquitin-conjugating enzyme E2C                               | 39   | 40   | 49   |
| 216080 | Ube2d1  | ubiquitin-conjugating enzyme E2D 1, UBC4/5 homolog (yeast)     | 135  | 132  | 132  |
| 56550  | Ube2d2  | ubiquitin-conjugating enzyme E2D 2                             | 117  | 121  | 116  |
| 66105  | Ube2d3  | ubiquitin-conjugating enzyme E2D 3 (UBC4/5 homolog, yeast)     | 57   | 64   | 58   |
| 237009 | Ube2dnl | ubiquitin-conjugating enzyme E2D N-terminal like               | 520  | 523  | 497  |
| 22194  | Ube2e1  | ubiquitin-conjugating enzyme E2E 1, UBC4/5 homolog (yeast)     | 827  | 799  | 811  |
| 218793 | Ube2e2  | ubiquitin-conjugating enzyme E2E 2 (UBC4/5 homolog, yeast)     | 1596 | 1643 | 1600 |
| 22193  | Ube2e3  | ubiquitin-conjugating enzyme E2E 3, UBC4/5 homolog (yeast)     | 1282 | 1285 | 1268 |
| 67921  | Ube2f   | ubiquitin-conjugating enzyme E2F (putative)                    | 150  | 151  | 151  |
| 67128  | Ube2g1  | ubiquitin-conjugating enzyme E2G 1 (UBC7 homolog, C. elegans)  | 179  | 182  | 174  |
| 22213  | Ube2g2  | ubiquitin-conjugating enzyme E2G 2                             | 45   | 44   | 46   |
| 22214  | Ube2h   | ubiquitin-conjugating enzyme E2H                               | 280  | 284  | 287  |
| 22196  | Ube2i   | ubiquitin-conjugating enzyme E2I                               | 52   | 50   | 55   |
| 56228  | Ube2j1  | ubiquitin-conjugating enzyme E2, J1                            | 41   | 39   | 39   |
| 140499 | Ube2j2  | ubiquitin-conjugating enzyme E2, J2 homolog (yeast)            | 72   | 70   | 69   |
| 53323  | Ube2k   | ubiquitin-conjugating enzyme E2K (UBC1 homolog, yeast)         | 267  | 262  | 268  |
| 22195  | Ube2l3  | ubiquitin-conjugating enzyme E2L 3                             | 86   | 82   | 83   |
| 56791  | Ube2l6  | ubiquitin-conjugating enzyme E2L 6                             | 55   | 57   | 61   |
| 22192  | Ube2m   | ubiquitin-conjugating enzyme E2M (UBC12 homolog, yeast)        | 22   | 17   | 22   |
| 93765  | Ube2n   | ubiquitin-conjugating enzyme E2N                               | 69   | 77   | 71   |
| 109161 | Ube2q2  | ubiquitin-conjugating enzyme E2Q (putative) 2                  | 203  | 208  | 204  |
| 67615  | Ube2r2  | ubiquitin-conjugating enzyme E2R 2                             | 193  | 191  | 205  |
| 77891  | Ube2s   | ubiquitin-conjugating enzyme E2S                               | 73   | 64   | 69   |
| 67196  | Ube2t   | ubiquitin-conjugating enzyme E2T (putative)                    | 193  | 195  | 195  |
| 66589  | Ube2v1  | ubiquitin-conjugating enzyme E2 variant 1                      | 162  | 151  | 152  |
| 70620  | Ube2v2  | ubiquitin-conjugating enzyme E2 variant 2                      | 939  | 938  | 959  |
| 66799  | Ube2w   | ubiquitin-conjugating enzyme E2W (putative)                    | 167  | 186  | 183  |
| 22215  | Ube3a   | ubiquitin protein ligase E3A                                   | 803  | 810  | 760  |
| 117146 | Ube3b   | ubiquitin protein ligase E3B                                   | 80   | 75   | 81   |
| 100763 | Ube3c   | ubiquitin protein ligase E3C                                   | 332  | 330  | 326  |
| 140630 | Ube4a   | ubiquitination factor E4A, UFD2 homolog (S. cerevisiae)        | 78   | 79   | 81   |
| 63958  | Ube4b   | ubiquitination factor E4B, UFD2 homolog (S. cerevisiae)        | 198  | 189  | 187  |
| 71707  | Ubiad1  | UbiA prenyltransferase domain containing 1                     | 214  | 204  | 212  |
| 140629 | Ubox5   | U box domain containing 5                                      | 65   | 62   | 67   |
| 22221  | Ubp1    | upstream binding protein 1                                     | 275  | 293  | 282  |
| 22222  | Ubr1    | ubiquitin protein ligase E3 component n-recognin 1             | 163  | 164  | 163  |
| 224826 | Ubr2    | ubiquitin protein ligase E3 component n-recognin 2             | 295  | 298  | 286  |
| 68795  | Ubr3    | ubiquitin protein ligase E3 component n-recognin 3             | 198  | 197  | 201  |
| 70790  | Ubr5    | ubiquitin protein ligase E3 component n-recognin 5             | 336  | 330  | 330  |

|        |         |                                                                   |      |      |      |
|--------|---------|-------------------------------------------------------------------|------|------|------|
| 21429  | Ubtf    | upstream binding transcription factor, RNA polymerase I           | 83   | 83   | 83   |
| 225896 | Ubxn1   | UBX domain protein 1                                              | 40   | 36   | 38   |
| 22223  | Uchl1   | ubiquitin carboxy-terminal hydrolase L1                           | 159  | 157  | 152  |
| 50933  | Uchl3   | ubiquitin carboxyl-terminal esterase L3 (ubiquitin thiolesterase) | 114  | 109  | 111  |
| 93841  | Uchl4   | ubiquitin carboxyl-terminal esterase L4                           | 92   | 99   | 92   |
| 56207  | Uchl5   | ubiquitin carboxyl-terminal esterase L5                           | 287  | 296  | 280  |
| 22245  | Uck1    | uridine-cytidine kinase 1                                         | 46   | 49   | 43   |
| 80914  | Uck2    | uridine-cytidine kinase 2                                         | 396  | 398  | 391  |
| 68556  | Uck1l   | uridine-cytidine kinase 1-like 1                                  | 15   | 18   | 16   |
| 22226  | Ucn     | urocortin                                                         | 51   | 49   | 48   |
| 171530 | Ucn2    | urocortin 2                                                       | 29   | 30   | 30   |
| 22229  | Ucp3    | uncoupling protein 3 (mitochondrial, proton carrier)              | 158  | 156  | 160  |
| 54122  | Uevld   | UEV and lactate/malate dehydrogenase domains                      | 73   | 71   | 71   |
| 66155  | Ufc1    | ubiquitin-fold modifier conjugating enzyme 1                      | 50   | 60   | 54   |
| 22230  | Ufd1l   | ubiquitin fusion degradation 1 like                               | 34   | 35   | 30   |
| 67890  | Ufm1    | ubiquitin-fold modifier 1                                         | 631  | 642  | 640  |
| 70240  | Ufsp1   | UFM1-specific peptidase 1                                         | 23   | 20   | 20   |
| 192169 | Ufsp2   | UFM1-specific peptidase 2                                         | 34   | 34   | 29   |
| 22234  | Ugcg    | UDP-glucose ceramide glucosyltransferase                          | 525  | 515  | 515  |
| 22235  | Ugdh    | UDP-glucose dehydrogenase                                         | 127  | 134  | 136  |
| 320011 | Uggt1   | UDP-glucose glycoprotein glucosyltransferase 1                    | 276  | 253  | 266  |
| 216558 | Ugp2    | UDP-glucose pyrophosphorylase 2                                   | 204  | 200  | 211  |
| 394436 | Ugt1a1  | UDP glucuronosyltransferase 1 family, polypeptide A1              | 29   | 24   | 24   |
| 394430 | Ugt1a10 | UDP glycosyltransferase 1 family, polypeptide A10                 | 80   | 83   | 82   |
| 22236  | Ugt1a2  | UDP glucuronosyltransferase 1 family, polypeptide A2              | 52   | 53   | 50   |
| 94284  | Ugt1a6a | UDP glucuronosyltransferase 1 family, polypeptide A6A             | 83   | 85   | 77   |
| 394435 | Ugt1a6b | UDP glucuronosyltransferase 1 family, polypeptide A6B             | 51   | 52   | 53   |
| 394432 | Ugt1a7c | UDP glucuronosyltransferase 1 family, polypeptide A7C             | 44   | 45   | 47   |
| 394434 | Ugt1a9  | UDP glucuronosyltransferase 1 family, polypeptide A9              | 49   | 46   | 52   |
| 94215  | Ugt2a1  | UDP glucuronosyltransferase 2 family, polypeptide A1              | 71   | 62   | 70   |
| 72094  | Ugt2a3  | UDP glucuronosyltransferase 2 family, polypeptide A3              | 205  | 218  | 206  |
| 71773  | Ugt2b1  | UDP glucuronosyltransferase 2 family, polypeptide B1              | 114  | 119  | 124  |
| 243085 | Ugt2b35 | UDP glucuronosyltransferase 2 family, polypeptide B35             | 207  | 211  | 222  |
| 100559 | Ugt2b38 | UDP glucuronosyltransferase 2 family, polypeptide B38             | 181  | 182  | 192  |
| 22238  | Ugt2b5  | UDP glucuronosyltransferase 2 family, polypeptide B5              | 209  | 213  | 209  |
| 105887 | Ugt3a1  | UDP glycosyltransferases 3 family, polypeptide A1                 | 246  | 256  | 249  |
| 223337 | Ugt3a2  | UDP glycosyltransferases 3 family, polypeptide A2                 | 196  | 209  | 195  |
| 22239  | Ugt8a   | UDP galactosyltransferase 8A                                      | 1214 | 1217 | 1192 |
| 16589  | Uhmk1   | U2AF homology motif (UHM) kinase 1                                | 67   | 75   | 72   |
| 18140  | Uhrf1   | ubiquitin-like, containing PHD and RING finger domains, 1         | 33   | 34   | 32   |
| 109113 | Uhrf2   | ubiquitin-like, containing PHD and RING finger domains 2          | 217  | 224  | 213  |
| 20184  | Uimc1   | ubiquitin interaction motif containing 1                          | 103  | 103  | 102  |
| 22241  | Ulk1    | Unc-51 like kinase 1 (C. elegans)                                 | 71   | 72   | 67   |
| 29869  | Ulk2    | Unc-51 like kinase 2 (C. elegans)                                 | 215  | 214  | 213  |
| 71742  | Ulk3    | unc-51-like kinase 3 (C. elegans)                                 | 65   | 59   | 57   |
| 209012 | Ulk4    | unc-51-like kinase 4 (C. elegans)                                 | 554  | 545  | 546  |
| 22247  | Umps    | uridine monophosphate synthetase                                  | 889  | 880  | 879  |
| 382018 | Unc13a  | unc-13 homolog A (C. elegans)                                     | 83   | 76   | 82   |
| 101869 | Unc45a  | unc-45 homolog A (C. elegans)                                     | 24   | 25   | 24   |
| 217012 | Unc45b  | unc-45 homolog B (C. elegans)                                     | 49   | 48   | 47   |
| 22255  | Uncx    | UNC homeobox                                                      | 314  | 315  | 324  |
| 22256  | Ung     | uracil DNA glycosylase                                            | 44   | 46   | 46   |
| 22262  | Uox     | urate oxidase                                                     | 122  | 119  | 123  |
| 103149 | Upb1    | ureidopropionase, beta                                            | 207  | 214  | 213  |
| 19704  | Upf1    | UPF1 regulator of nonsense transcripts homolog (yeast)            | 55   | 52   | 53   |

|        |        |                                                                    |      |      |      |
|--------|--------|--------------------------------------------------------------------|------|------|------|
| 326622 | Upf2   | UPF2 regulator of nonsense transcripts homolog (yeast)             | 247  | 243  | 240  |
| 67031  | Upf3a  | UPF3 regulator of nonsense transcripts homolog A (yeast)           | 99   | 96   | 100  |
| 68134  | Upf3b  | UPF3 regulator of nonsense transcripts homolog B (yeast)           | 49   | 47   | 50   |
| 100647 | Upk3b  | uroplakin 3B                                                       | 84   | 77   | 81   |
| 22271  | Upp1   | uridine phosphorylase 1                                            | 188  | 190  | 191  |
| 76654  | Upp2   | uridine phosphorylase 2                                            | 744  | 748  | 738  |
| 331487 | Uprt   | uracil phosphoribosyltransferase (FUR1) homolog (S. cerevisiae)    | 312  | 317  | 297  |
| 66152  | Uqcr10 | ubiquinol-cytochrome c reductase, complex III subunit X            | 91   | 88   | 91   |
| 66594  | Uqcr11 | ubiquinol-cytochrome c reductase, complex III subunit XI           | 39   | 42   | 38   |
| 22273  | Uqcr1  | ubiquinol-cytochrome c reductase core protein 1                    | 50   | 52   | 49   |
| 67003  | Uqcr2  | ubiquinol cytochrome c reductase core protein 2                    | 89   | 90   | 93   |
| 66694  | Uqcrf1 | ubiquinol-cytochrome c reductase, Rieske iron-sulfur polypeptide 1 | 409  | 408  | 399  |
| 66576  | Uqcrh  | ubiquinol-cytochrome c reductase hinge protein                     | 31   | 31   | 31   |
| 22272  | Uqcrq  | ubiquinol-cytochrome c reductase, complex III subunit VII          | 11   | 12   | 9    |
| 68205  | Urm1   | ubiquitin related modifier 1 homolog (S. cerevisiae)               | 52   | 56   | 55   |
| 243537 | Uroc1  | urocanase domain containing 1                                      | 56   | 54   | 63   |
| 22275  | Urod   | uroporphyrinogen decarboxylase                                     | 147  | 160  | 155  |
| 22276  | Uros   | uroporphyrinogen III synthase                                      | 37   | 32   | 34   |
| 22278  | Usf1   | upstream transcription factor 1                                    | 41   | 35   | 40   |
| 22282  | Usf2   | upstream transcription factor 2                                    | 30   | 31   | 32   |
| 230484 | Usp1   | ubiquitin specific peptidase 1                                     | 269  | 276  | 276  |
| 22224  | Usp10  | ubiquitin specific peptidase 10                                    | 165  | 164  | 165  |
| 236733 | Usp11  | ubiquitin specific peptidase 11                                    | 199  | 193  | 189  |
| 22217  | Usp12  | ubiquitin specific peptidase 12                                    | 331  | 315  | 325  |
| 72607  | Usp13  | ubiquitin specific peptidase 13 (isopeptidase T-3)                 | 320  | 321  | 304  |
| 59025  | Usp14  | ubiquitin specific peptidase 14                                    | 276  | 286  | 284  |
| 14479  | Usp15  | ubiquitin specific peptidase 15                                    | 235  | 229  | 236  |
| 74112  | Usp16  | ubiquitin specific peptidase 16                                    | 69   | 77   | 73   |
| 13532  | Usp17  | ubiquitin specific peptidase 17-like 5                             | 75   | 75   | 68   |
| 24110  | Usp18  | ubiquitin specific peptidase 18                                    | 117  | 115  | 108  |
| 71472  | Usp19  | ubiquitin specific peptidase 19                                    | 33   | 29   | 31   |
| 53376  | Usp2   | ubiquitin specific peptidase 2                                     | 94   | 94   | 87   |
| 74270  | Usp20  | ubiquitin specific peptidase 20                                    | 144  | 134  | 148  |
| 30941  | Usp21  | ubiquitin specific peptidase 21                                    | 16   | 16   | 14   |
| 216825 | Usp22  | ubiquitin specific peptidase 22                                    | 84   | 87   | 83   |
| 329908 | Usp24  | ubiquitin specific peptidase 24                                    | 1685 | 1676 | 1663 |
| 30940  | Usp25  | ubiquitin specific peptidase 25                                    | 1193 | 1209 | 1197 |
| 83563  | Usp26  | ubiquitin specific peptidase 26                                    | 351  | 338  | 339  |
| 54651  | Usp27  | ubiquitin specific peptidase 27, X chromosome                      | 155  | 156  | 149  |
| 235323 | Usp28  | ubiquitin specific peptidase 28                                    | 122  | 114  | 117  |
| 57775  | Usp29  | ubiquitin specific peptidase 29                                    | 98   | 92   | 91   |
| 235441 | Usp3   | ubiquitin specific peptidase 3                                     | 250  | 245  | 255  |
| 100756 | Usp30  | ubiquitin specific peptidase 30                                    | 50   | 43   | 44   |
| 76179  | Usp31  | ubiquitin specific peptidase 31                                    | 439  | 442  | 435  |
| 237898 | Usp32  | ubiquitin specific peptidase 32                                    | 275  | 279  | 270  |
| 170822 | Usp33  | ubiquitin specific peptidase 33                                    | 69   | 68   | 71   |
| 17847  | Usp34  | ubiquitin specific peptidase 34                                    | 317  | 314  | 311  |
| 72344  | Usp36  | ubiquitin specific peptidase 36                                    | 115  | 121  | 118  |
| 319651 | Usp37  | ubiquitin specific peptidase 37                                    | 2    | 1    | 1    |
| 74841  | Usp38  | ubiquitin specific peptidase 38                                    | 1070 | 1076 | 1047 |
| 28035  | Usp39  | ubiquitin specific peptidase 39                                    | 57   | 56   | 55   |
| 22258  | Usp4   | ubiquitin specific peptidase 4 (proto-oncogene)                    | 70   | 65   | 71   |
| 227334 | Usp40  | ubiquitin specific peptidase 40                                    | 260  | 257  | 266  |
| 76800  | Usp42  | ubiquitin specific peptidase 42                                    | 141  | 135  | 136  |
| 216835 | Usp43  | ubiquitin specific peptidase 43                                    | 210  | 209  | 222  |

|        |          |                                                                         |      |      |      |
|--------|----------|-------------------------------------------------------------------------|------|------|------|
| 327799 | Usp44    | ubiquitin specific peptidase 44                                         | 264  | 258  | 265  |
| 77593  | Usp45    | ubiquitin specific peptidase 45                                         | 107  | 108  | 107  |
| 69727  | Usp46    | ubiquitin specific peptidase 46                                         | 540  | 554  | 543  |
| 74996  | Usp47    | ubiquitin specific peptidase 47                                         | 486  | 478  | 487  |
| 170707 | Usp48    | ubiquitin specific peptidase 48                                         | 141  | 137  | 142  |
| 22225  | Usp5     | ubiquitin specific peptidase 5 (isopeptidase T)                         | 20   | 20   | 19   |
| 75083  | Usp50    | ubiquitin specific peptidase 50                                         | 221  | 214  | 211  |
| 635253 | Usp51    | ubiquitin specific protease 51                                          | 314  | 318  | 304  |
| 99526  | Usp53    | ubiquitin specific peptidase 53                                         | 135  | 144  | 132  |
| 78787  | Usp54    | ubiquitin specific peptidase 54                                         | 148  | 146  | 138  |
| 252870 | Usp7     | ubiquitin specific peptidase 7                                          | 206  | 202  | 210  |
| 84092  | Usp8     | ubiquitin specific peptidase 8                                          | 137  | 144  | 145  |
| 22284  | Usp9x    | ubiquitin specific peptidase 9, X chromosome                            | 631  | 614  | 612  |
| 107868 | Usp9y    | ubiquitin specific peptidase 9, Y chromosome                            | 984  | 1010 | 960  |
| 231915 | Usp11    | ubiquitin specific peptidase like 1                                     | 102  | 101  | 104  |
| 338362 | Ust      | uronyl-2-sulfotransferase                                               | 1158 | 1189 | 1201 |
| 22286  | Utf1     | undifferentiated embryonic cell transcription factor 1                  | 87   | 84   | 84   |
| 67205  | Utp111   | UTP11-like, U3 small nucleolar ribonucleoprotein, (yeast)               | 59   | 57   | 59   |
| 72554  | Utp14a   | UTP14, U3 small nucleolar ribonucleoprotein, homolog A (yeast)          | 162  | 145  | 161  |
| 195434 | Utp14b   | UTP14, U3 small nucleolar ribonucleoprotein, homolog B (yeast)          | 206  | 206  | 201  |
| 105372 | Utp15    | UTP15, U3 small nucleolar ribonucleoprotein, homolog (yeast)            | 73   | 69   | 74   |
| 217109 | Utp18    | UTP18, small subunit (SSU) processome component, homolog (yeast)        | 1034 | 1035 | 1007 |
| 70683  | Utp20    | UTP20, small subunit (SSU) processome component, homolog (yeast)        | 200  | 199  | 197  |
| 78581  | Utp23    | UTP23, small subunit (SSU) processome component, homolog (yeast)        | 157  | 165  | 158  |
| 65961  | Utp3     | UTP3, small subunit (SSU) processome component, homolog (S. cerevisiae) | 63   | 67   | 63   |
| 216987 | Utp6     | UTP6, small subunit (SSU) processome component, homolog (yeast)         | 355  | 361  | 347  |
| 24111  | Uts2     | urotensin 2                                                             | 151  | 151  | 148  |
| 67883  | Uxs1     | UDP-glucuronate decarboxylase 1                                         | 266  | 264  | 276  |
| 22319  | Vamp3    | vesicle-associated membrane protein 3                                   | 1015 | 1052 | 1037 |
| 22321  | Vars     | valyl-tRNA synthetase                                                   | 41   | 44   | 50   |
| 68915  | Vars2    | valyl-tRNA synthetase 2, mitochondrial (putative)                       | 30   | 24   | 29   |
| 26949  | Vat1     | vesicle amine transport protein 1 homolog (T. californica)              | 23   | 21   | 26   |
| 270097 | Vat11    | vesicle amine transport protein 1 homolog-like (T. californica)         | 362  | 360  | 362  |
| 22326  | Vax1     | ventral anterior homeobox containing gene 1                             | 176  | 179  | 185  |
| 24113  | Vax2     | ventral anterior homeobox containing gene 2                             | 1    | 1    | 1    |
| 22327  | Vbp1     | von Hippel-Lindau binding protein 1                                     | 186  | 191  | 185  |
| 269523 | Vcp      | valosin containing protein                                              | 49   | 50   | 52   |
| 70675  | Vcpip1   | valosin containing protein (p97)/p47 complex interacting protein 1      | 127  | 121  | 122  |
| 22337  | Vdr      | vitamin D receptor                                                      | 143  | 154  | 143  |
| 22339  | Vegfa    | vascular endothelial growth factor A                                    | 556  | 540  | 550  |
| 22340  | Vegfb    | vascular endothelial growth factor B                                    | 11   | 11   | 11   |
| 22341  | Vegfc    | vascular endothelial growth factor C                                    | 1110 | 1106 | 1081 |
| 381677 | Vgf      | VGF nerve growth factor inducible                                       | 67   | 65   | 69   |
| 170828 | Vgll1    | vestigial like 1 homolog (Drosophila)                                   | 187  | 189  | 197  |
| 215031 | Vgll2    | vestigial like 2 homolog (Drosophila)                                   | 632  | 655  | 621  |
| 232334 | Vgll4    | vestigial like 4 (Drosophila)                                           | 506  | 498  | 510  |
| 22346  | Vhl      | von Hippel-Lindau tumor suppressor                                      | 43   | 42   | 39   |
| 104799 | Vipar    | VPS33B interacting protein, apical-basolateral polarity regulator       | 37   | 34   | 42   |
| 27973  | Vkorc1   | vitamin K epoxide reductase complex, subunit 1                          | 16   | 20   | 15   |
| 69568  | Vkorc111 | vitamin K epoxide reductase complex, subunit 1-like 1                   | 122  | 123  | 122  |
| 22359  | Vldlr    | very low density lipoprotein receptor                                   | 564  | 572  | 567  |
| 75909  | Vmp1     | vacuole membrane protein 1                                              | 131  | 130  | 130  |
| 22361  | Vnn1     | vanin 1                                                                 | 84   | 94   | 96   |
| 26464  | Vnn3     | vanin 3                                                                 | 125  | 126  | 129  |
| 232023 | Vopp1    | vesicular, overexpressed in cancer, prosurvival protein 1               | 175  | 187  | 176  |

|        |         |                                                     |      |      |      |
|--------|---------|-----------------------------------------------------|------|------|------|
| 28084  | Vps25   | vacuolar protein sorting 25 (yeast)                 | 17   | 22   | 17   |
| 66914  | Vps28   | vacuolar protein sorting 28 (yeast)                 | 33   | 29   | 30   |
| 65114  | Vps35   | vacuolar protein sorting 35                         | 85   | 84   | 88   |
| 70160  | Vps36   | vacuolar protein sorting 36 (yeast)                 | 53   | 53   | 53   |
| 20479  | Vps4b   | vacuolar protein sorting 4b (yeast)                 | 129  | 137  | 127  |
| 21427  | Vps72   | vacuolar protein sorting 72 (yeast)                 | 24   | 23   | 23   |
| 22367  | Vrk1    | vaccinia related kinase 1                           | 856  | 837  | 859  |
| 69922  | Vrk2    | vaccinia related kinase 2                           | 495  | 501  | 504  |
| 101568 | Vrk3    | vaccinia related kinase 3                           | 82   | 88   | 90   |
| 114889 | Vsx1    | visual system homeobox 1 homolog (zebrafish)        | 102  | 111  | 95   |
| 12677  | Vsx2    | visual system homeobox 2                            | 216  | 218  | 224  |
| 22370  | Vtn     | vitronectin                                         | 7    | 8    | 8    |
| 225131 | Wac     | WW domain containing adaptor with coiled-coil       | 1996 | 2030 | 1994 |
| 218914 | Wapal   | wings apart-like homolog (Drosophila)               | 277  | 278  | 282  |
| 22375  | Wars    | tryptophanyl-tRNA synthetase                        | 59   | 55   | 61   |
| 70560  | Wars2   | tryptophanyl tRNA synthetase 2 (mitochondrial)      | 474  | 463  | 463  |
| 73178  | Wasl    | Wiskott-Aldrich syndrome-like (human)               | 164  | 166  | 169  |
| 60321  | Wbp11   | WW domain binding protein 11                        | 23   | 26   | 21   |
| 22380  | Wbp4    | WW domain binding protein 4                         | 139  | 138  | 142  |
| 75410  | Wbp7    | WW domain binding protein 7                         | 29   | 27   | 27   |
| 66138  | Wbscr22 | Williams Beuren syndrome chromosome region 22       | 55   | 51   | 52   |
| 72145  | Wdfy3   | WD repeat and FYVE domain containing 3              | 942  | 949  | 932  |
| 57750  | Wdr12   | WD repeat domain 12                                 | 182  | 187  | 178  |
| 57773  | Wdr4    | WD repeat domain 4                                  | 182  | 169  | 172  |
| 54636  | Wdr45   | WD repeat domain 45                                 | 40   | 39   | 42   |
| 66840  | Wdr45l  | Wdr45 like                                          | 166  | 165  | 161  |
| 67561  | Wdr48   | WD repeat domain 48                                 | 145  | 143  | 146  |
| 140858 | Wdr5    | WD repeat domain 5                                  | 268  | 267  | 257  |
| 67936  | Wdr55   | WD repeat domain 55                                 | 28   | 28   | 26   |
| 77305  | Wdr82   | WD repeat domain containing 82                      | 24   | 26   | 24   |
| 67836  | Wdr83   | WD repeat domain containing 83                      | 10   | 10   | 11   |
| 67228  | Wdr85   | WD repeat domain 85                                 | 34   | 35   | 33   |
| 103784 | Wdr92   | WD repeat domain 92                                 | 57   | 60   | 58   |
| 72137  | Wdsub1  | WD repeat, SAM and U-box domain containing 1        | 660  | 661  | 643  |
| 230796 | Wdte1   | WD and tetratricopeptide repeats 1                  | 124  | 124  | 126  |
| 76773  | Wdyhv1  | WDYHV motif containing 1                            | 106  | 106  | 110  |
| 22390  | Wee1    | WEE 1 homolog 1 (S. pombe)                          | 210  | 213  | 212  |
| 381759 | Wee2    | WEE1 homolog 2 (S. pombe)                           | 45   | 46   | 45   |
| 215001 | Wfikk1  | WAP, FS, Ig, KU, and NTR-containing protein 1       | 38   | 36   | 33   |
| 22393  | Wfs1    | Wolfram syndrome 1 homolog (human)                  | 234  | 244  | 229  |
| 107823 | Whsc1   | Wolf-Hirschhorn syndrome candidate 1 (human)        | 203  | 189  | 193  |
| 234135 | Whsc111 | Wolf-Hirschhorn syndrome candidate 1-like 1 (human) | 210  | 209  | 204  |
| 24116  | Whsc2   | Wolf-Hirschhorn syndrome candidate 2 (human)        | 184  | 175  | 187  |
| 78428  | Wibg    | within bgcn homolog (Drosophila)                    | 59   | 62   | 66   |
| 24117  | Wif1    | Wnt inhibitory factor 1                             | 447  | 415  | 424  |
| 52639  | Wipi1   | WD repeat domain, phosphoinositide interacting 1    | 137  | 131  | 142  |
| 74781  | Wipi2   | WD repeat domain, phosphoinositide interacting 2    | 119  | 113  | 111  |
| 232341 | Wnk1    | WNK lysine deficient protein kinase 1               | 76   | 73   | 72   |
| 75607  | Wnk2    | WNK lysine deficient protein kinase 2               | 285  | 279  | 269  |
| 69847  | Wnk4    | WNK lysine deficient protein kinase 4               | 29   | 33   | 31   |
| 22408  | Wnt1    | wingless-related MMTV integration site 1            | 35   | 37   | 34   |
| 22409  | Wnt10a  | wingless related MMTV integration site 10a          | 95   | 90   | 95   |
| 22410  | Wnt10b  | wingless related MMTV integration site 10b          | 29   | 30   | 30   |
| 22411  | Wnt11   | wingless-related MMTV integration site 11           | 555  | 540  | 574  |
| 93735  | Wnt16   | wingless-related MMTV integration site 16           | 452  | 453  | 472  |

|        |          |                                                                   |      |      |      |
|--------|----------|-------------------------------------------------------------------|------|------|------|
| 22413  | Wnt2     | wingless-related MMTV integration site 2                          | 454  | 468  | 446  |
| 22414  | Wnt2b    | wingless related MMTV integration site 2b                         | 250  | 242  | 236  |
| 22415  | Wnt3     | wingless-related MMTV integration site 3                          | 257  | 256  | 251  |
| 22416  | Wnt3a    | wingless-related MMTV integration site 3A                         | 99   | 94   | 95   |
| 22417  | Wnt4     | wingless-related MMTV integration site 4                          | 376  | 375  | 383  |
| 22418  | Wnt5a    | wingless-related MMTV integration site 5A                         | 1779 | 1804 | 1802 |
| 22419  | Wnt5b    | wingless-related MMTV integration site 5B                         | 491  | 479  | 466  |
| 22420  | Wnt6     | wingless-related MMTV integration site 6                          | 49   | 52   | 50   |
| 22421  | Wnt7a    | wingless-related MMTV integration site 7A                         | 320  | 324  | 339  |
| 22422  | Wnt7b    | wingless-related MMTV integration site 7B                         | 475  | 459  | 459  |
| 20890  | Wnt8a    | wingless-related MMTV integration site 8A                         | 91   | 93   | 101  |
| 22423  | Wnt8b    | wingless related MMTV integration site 8b                         | 181  | 180  | 178  |
| 216795 | Wnt9a    | wingless-type MMTV integration site 9A                            | 105  | 91   | 105  |
| 22412  | Wnt9b    | wingless-type MMTV integration site 9B                            | 109  | 96   | 99   |
| 216853 | Wrap53   | WD repeat containing, antisense to TP53                           | 25   | 22   | 21   |
| 22427  | Wrn      | Werner syndrome homolog (human)                                   | 542  | 553  | 540  |
| 78903  | Wrnip1   | Werner helicase interacting protein 1                             | 89   | 84   | 85   |
| 22431  | Wt1      | Wilms tumor 1 homolog                                             | 128  | 123  | 120  |
| 60532  | Wtap     | Wilms' tumour 1-associating protein                               | 58   | 59   | 60   |
| 101543 | Wtip     | WT1-interacting protein                                           | 96   | 95   | 96   |
| 211652 | Wwc1     | WW, C2 and coiled-coil domain containing 1                        | 1444 | 1430 | 1447 |
| 80707  | Wwox     | WW domain-containing oxidoreductase                               | 1667 | 1629 | 1680 |
| 107568 | Wwp1     | WW domain containing E3 ubiquitin protein ligase 1                | 297  | 315  | 315  |
| 66894  | Wwp2     | WW domain containing E3 ubiquitin protein ligase 2                | 171  | 169  | 167  |
| 97064  | Wwtr1    | WW domain containing transcription regulator 1                    | 299  | 299  | 297  |
| 67439  | Xab2     | XPA binding protein 2                                             | 42   | 44   | 45   |
| 22433  | Xbp1     | X-box binding protein 1                                           | 128  | 128  | 132  |
| 16963  | Xcl1     | chemokine (C motif) ligand 1                                      | 462  | 480  | 468  |
| 22436  | Xdh      | xanthine dehydrogenase                                            | 318  | 317  | 309  |
| 22590  | Xpa      | xeroderma pigmentosum, complementation group A                    | 255  | 275  | 270  |
| 22591  | Xpc      | xeroderma pigmentosum, complementation group C                    | 53   | 48   | 54   |
| 170750 | Xpnpep1  | X-prolyl aminopeptidase (aminopeptidase P) 1, soluble             | 295  | 270  | 277  |
| 103573 | Xpo1     | exportin 1, CRM1 homolog (yeast)                                  | 385  | 385  | 389  |
| 72322  | Xpo5     | exportin 5                                                        | 39   | 35   | 37   |
| 22594  | Xrcc1    | X-ray repair complementing defective repair in Chinese hamster ce | 51   | 51   | 53   |
| 57434  | Xrcc2    | X-ray repair complementing defective repair in Chinese hamster ce | 297  | 292  | 306  |
| 74335  | Xrcc3    | X-ray repair complementing defective repair in Chinese hamster ce | 68   | 68   | 71   |
| 108138 | Xrcc4    | X-ray repair complementing defective repair in Chinese hamster ce | 437  | 439  | 431  |
| 22596  | Xrcc5    | X-ray repair complementing defective repair in Chinese hamster ce | 325  | 326  | 327  |
| 14375  | Xrcc6    | X-ray repair complementing defective repair in Chinese hamster ce | 44   | 39   | 43   |
| 68876  | Xrcc6bp1 | XRCC6 binding protein 1                                           | 1289 | 1288 | 1257 |
| 24127  | Xrn1     | 5'-3' exoribonuclease 1                                           | 335  | 341  | 330  |
| 24128  | Xrn2     | 5'-3' exoribonuclease 2                                           | 299  | 294  | 296  |
| 102448 | Xylb     | xylulokinase homolog (H. influenzae)                              | 82   | 81   | 88   |
| 233781 | Xylt1    | xylosyltransferase 1                                              | 2113 | 2110 | 2039 |
| 217119 | Xylt2    | xylosyltransferase II                                             | 67   | 70   | 63   |
| 67057  | Yaf2     | YY1 associated factor 2                                           | 160  | 147  | 157  |
| 22601  | Yap1     | yes-associated protein 1                                          | 224  | 218  | 221  |
| 107271 | Yars     | tyrosyl-tRNA synthetase                                           | 78   | 73   | 78   |
| 70120  | Yars2    | tyrosyl-tRNA synthetase 2 (mitochondrial)                         | 188  | 188  | 189  |
| 22608  | Ybx1     | Y box protein 1                                                   | 87   | 84   | 84   |
| 53422  | Ybx2     | Y box protein 2                                                   | 30   | 32   | 32   |
| 69101  | YdjC     | YdjC homolog (bacterial)                                          | 71   | 78   | 69   |
| 208146 | Yeats2   | YEATS domain containing 2                                         | 93   | 102  | 100  |
| 64050  | Yeats4   | YEATS domain containing 4                                         | 110  | 115  | 118  |

|           |         |                                                               |      |      |      |
|-----------|---------|---------------------------------------------------------------|------|------|------|
| 22612     | Yes1    | Yamaguchi sarcoma viral (v-yes) oncogene homolog 1            | 465  | 487  | 460  |
| 56418     | Ykt6    | YKT6 homolog (S. Cerevisiae)                                  | 144  | 142  | 140  |
| 56531     | Ylpm1   | YLP motif containing 1                                        | 177  | 177  | 178  |
| 27377     | Yme11   | YME1-like 1 (S. cerevisiae)                                   | 71   | 68   | 65   |
| 226418    | Yod1    | YOD1 OTU deubiquitinating enzyme 1 homologue (S. cerevisiae)  | 15   | 14   | 15   |
| 383295    | Ypel5   | yippee-like 5 (Drosophila)                                    | 404  | 419  | 388  |
| 231386    | Ythdc1  | YTH domain containing 1                                       | 201  | 213  | 200  |
| 54401     | Ywhab   | tyrosine 3-monooxygenase/tryptophan 5-monooxygenase activatio | 143  | 139  | 133  |
| 22627     | Ywhae   | tyrosine 3-monooxygenase/tryptophan 5-monooxygenase activatio | 151  | 158  | 147  |
| 22628     | Ywhag   | tyrosine 3-monooxygenase/tryptophan 5-monooxygenase activatio | 120  | 112  | 116  |
| 22629     | Ywhah   | tyrosine 3-monooxygenase/tryptophan 5-monooxygenase activatio | 317  | 310  | 317  |
| 22630     | Ywhaq   | tyrosine 3-monooxygenase/tryptophan 5-monooxygenase activatio | 1971 | 1941 | 1940 |
| 22632     | Yy1     | YY1 transcription factor                                      | 167  | 168  | 174  |
| 100073351 | Yy2     | Yy2 transcription factor                                      | 132  | 136  | 126  |
| 225791    | Zadh2   | zinc binding alcohol dehydrogenase, domain containing 2       | 635  | 628  | 631  |
| 22637     | Zap70   | zeta-chain (TCR) associated protein kinase                    | 301  | 302  | 292  |
| 667118    | Zbed6   | zinc finger, BED domain containing 6                          | 62   | 66   | 69   |
| 268564    | Zbtb1   | zinc finger and BTB domain containing 1                       | 40   | 40   | 41   |
| 229055    | Zbtb10  | zinc finger and BTB domain containing 10                      | 527  | 523  | 511  |
| 235320    | Zbtb16  | zinc finger and BTB domain containing 16                      | 378  | 377  | 389  |
| 22642     | Zbtb17  | zinc finger and BTB domain containing 17                      | 126  | 121  | 124  |
| 56490     | Zbtb20  | zinc finger and BTB domain containing 20                      | 858  | 875  | 877  |
| 81630     | Zbtb22  | zinc finger and BTB domain containing 22                      | 12   | 9    | 10   |
| 268294    | Zbtb24  | zinc finger and BTB domain containing 24                      | 233  | 218  | 221  |
| 75291     | Zbtb3   | zinc finger and BTB domain containing 3                       | 29   | 29   | 32   |
| 58206     | Zbtb32  | zinc finger and BTB domain containing 32                      | 30   | 31   | 33   |
| 56805     | Zbtb33  | zinc finger and BTB domain containing 33                      | 101  | 110  | 107  |
| 245007    | Zbtb38  | zinc finger and BTB domain containing 38                      | 152  | 152  | 151  |
| 226470    | Zbtb41  | zinc finger and BTB domain containing 41 homolog              | 98   | 95   | 97   |
| 382639    | Zbtb42  | zinc finger and BTB domain containing 42                      | 56   | 50   | 57   |
| 71834     | Zbtb43  | zinc finger and BTB domain containing 43                      | 273  | 267  | 267  |
| 235132    | Zbtb44  | zinc finger and BTB domain containing 44                      | 250  | 249  | 238  |
| 72147     | Zbtb46  | zinc finger and BTB domain containing 46                      | 187  | 189  | 190  |
| 100090    | Zbtb48  | zinc finger and BTB domain containing 48                      | 38   | 40   | 36   |
| 75079     | Zbtb49  | zinc finger and BTB domain containing 49                      | 71   | 74   | 73   |
| 230119    | Zbtb5   | zinc finger and BTB domain containing 5                       | 46   | 46   | 45   |
| 241322    | Zbtb6   | zinc finger and BTB domain containing 6                       | 26   | 26   | 29   |
| 16969     | Zbtb7a  | zinc finger and BTB domain containing 7a                      | 67   | 58   | 65   |
| 22724     | Zbtb7b  | zinc finger and BTB domain containing 7B                      | 36   | 42   | 37   |
| 73680     | Zbtb8a  | zinc finger and BTB domain containing 8a                      | 139  | 136  | 139  |
| 215627    | Zbtb8b  | zinc finger and BTB domain containing 8b                      | 109  | 111  | 113  |
| 474156    | Zbtb9   | zinc finger and BTB domain containing 9                       | 101  | 99   | 102  |
| 223642    | Zc3h3   | zinc finger CCCH type containing 3                            | 147  | 147  | 153  |
| 57432     | Zc3h8   | zinc finger CCCH type containing 8                            | 134  | 131  | 139  |
| 230594    | Zcchc11 | zinc finger, CCHC domain containing 11                        | 233  | 229  | 229  |
| 72693     | Zcchc12 | zinc finger, CCHC domain containing 12                        | 273  | 259  | 243  |
| 78796     | Zcchc4  | zinc finger, CCHC domain containing 4                         | 126  | 118  | 121  |
| 214290    | Zcchc6  | zinc finger, CCHC domain containing 6                         | 521  | 538  | 542  |
| 70650     | Zcchc8  | zinc finger, CCHC domain containing 8                         | 82   | 85   | 83   |
| 67197     | Zcrb1   | zinc finger CCHC-type and RNA binding motif 1                 | 80   | 82   | 84   |
| 70796     | Zdhhc1  | zinc finger, DHHC domain containing 1                         | 64   | 62   | 65   |
| 243983    | Zdhhc13 | zinc finger, DHHC domain containing 13                        | 256  | 263  | 249  |
| 108672    | Zdhhc15 | zinc finger, DHHC domain containing 15                        | 451  | 454  | 433  |
| 320150    | Zdhhc17 | zinc finger, DHHC domain containing 17                        | 322  | 313  | 310  |
| 503610    | Zdhhc18 | zinc finger, DHHC domain containing 18                        | 90   | 91   | 92   |

|        |         |                                           |      |      |      |
|--------|---------|-------------------------------------------|------|------|------|
| 70546  | Zdhhc2  | zinc finger, DHHC domain containing 2     | 245  | 253  | 252  |
| 68268  | Zdhhc21 | zinc finger, DHHC domain containing 21    | 479  | 471  | 478  |
| 69035  | Zdhhc3  | zinc finger, DHHC domain containing 3     | 102  | 107  | 106  |
| 102193 | Zdhhc7  | zinc finger, DHHC domain containing 7     | 149  | 160  | 151  |
| 21417  | Zeb1    | zinc finger E-box binding homeobox 1      | 339  | 340  | 324  |
| 24136  | Zeb2    | zinc finger E-box binding homeobox 2      | 4658 | 4696 | 4567 |
| 227693 | Zer1    | zer-1 homolog (C. elegans)                | 51   | 51   | 54   |
| 22639  | Zfa     | zinc finger protein, autosomal            | 347  | 371  | 352  |
| 380993 | Zfat    | zinc finger and AT hook domain containing | 1456 | 1483 | 1467 |
| 11906  | Zfhx3   | zinc finger homeobox 3                    | 1725 | 1729 | 1734 |
| 22640  | Zfp1    | zinc finger protein 1                     | 81   | 74   | 75   |
| 65020  | Zfp110  | zinc finger protein 110                   | 81   | 85   | 86   |
| 56707  | Zfp111  | zinc finger protein 111                   | 78   | 75   | 85   |
| 231866 | Zfp12   | zinc finger protein 12                    | 58   | 58   | 53   |
| 104348 | Zfp120  | zinc finger protein 120                   | 458  | 443  | 446  |
| 243833 | Zfp128  | zinc finger protein 128                   | 77   | 82   | 81   |
| 20841  | Zfp143  | zinc finger protein 143                   | 98   | 98   | 94   |
| 22661  | Zfp148  | zinc finger protein 148                   | 346  | 355  | 356  |
| 22666  | Zfp161  | zinc finger protein 161                   | 333  | 333  | 333  |
| 382118 | Zfp167  | zinc finger protein 167                   | 78   | 75   | 75   |
| 385674 | Zfp174  | zinc finger protein 174                   | 42   | 38   | 41   |
| 319535 | Zfp182  | zinc finger protein 182                   | 131  | 138  | 123  |
| 193452 | Zfp184  | zinc finger protein 184 (Kruppel-like)    | 118  | 110  | 100  |
| 432731 | Zfp187  | zinc finger protein 187                   | 31   | 29   | 28   |
| 59057  | Zfp191  | zinc finger protein 191                   | 175  | 167  | 169  |
| 93681  | Zfp192  | zinc finger protein 192                   | 42   | 43   | 36   |
| 22678  | Zfp2    | zinc finger protein 2                     | 55   | 54   | 54   |
| 80902  | Zfp202  | zinc finger protein 202                   | 101  | 101  | 105  |
| 449521 | Zfp213  | zinc finger protein 213                   | 149  | 147  | 148  |
| 228913 | Zfp217  | zinc finger protein 217                   | 486  | 479  | 480  |
| 69890  | Zfp219  | zinc finger protein 219                   | 23   | 24   | 25   |
| 30928  | Zfp238  | zinc finger protein 238                   | 518  | 521  | 516  |
| 22685  | Zfp239  | zinc finger protein 239                   | 77   | 79   | 78   |
| 26466  | Zfp260  | zinc finger protein 260                   | 42   | 47   | 44   |
| 74120  | Zfp263  | zinc finger protein 263                   | 149  | 165  | 150  |
| 22689  | Zfp27   | zinc finger protein 27                    | 124  | 117  | 126  |
| 57247  | Zfp276  | zinc finger protein (C2H2 type) 276       | 74   | 81   | 83   |
| 22690  | Zfp28   | zinc finger protein 28                    | 66   | 65   | 63   |
| 208968 | Zfp280c | zinc finger protein 280C                  | 131  | 134  | 123  |
| 235469 | Zfp280d | zinc finger protein 280D                  | 428  | 424  | 425  |
| 226442 | Zfp281  | zinc finger protein 281                   | 298  | 306  | 301  |
| 170740 | Zfp287  | zinc finger protein 287                   | 190  | 189  | 175  |
| 30046  | Zfp292  | zinc finger protein 292                   | 146  | 145  | 145  |
| 114565 | Zfp295  | zinc finger protein 295                   | 211  | 204  | 203  |
| 193043 | Zfp3    | zinc finger protein 3                     | 147  | 145  | 140  |
| 22693  | Zfp30   | zinc finger protein 30                    | 59   | 53   | 53   |
| 54201  | Zfp316  | zinc finger protein 316                   | 93   | 89   | 89   |
| 57908  | Zfp318  | zinc finger protein 318                   | 135  | 136  | 132  |
| 79233  | Zfp319  | zinc finger protein 319                   | 26   | 20   | 22   |
| 218100 | Zfp322a | zinc finger protein 322A                  | 236  | 225  | 228  |
| 54367  | Zfp326  | zinc finger protein 326                   | 989  | 991  | 981  |
| 67230  | Zfp329  | zinc finger protein 329                   | 79   | 79   | 79   |
| 22694  | Zfp35   | zinc finger protein 35                    | 53   | 52   | 53   |
| 21408  | Zfp354a | zinc finger protein 354A                  | 300  | 306  | 295  |
| 27274  | Zfp354b | zinc finger protein 354B                  | 55   | 51   | 53   |

|                |                                         |      |      |      |
|----------------|-----------------------------------------|------|------|------|
| 30944 Zfp354c  | zinc finger protein 354C                | 306  | 311  | 311  |
| 22695 Zfp36    | zinc finger protein 36                  | 26   | 25   | 24   |
| 238673 Zfp367  | zinc finger protein 367                 | 43   | 39   | 37   |
| 170936 Zfp369  | zinc finger protein 369                 | 1132 | 1170 | 1137 |
| 12192 Zfp36I1  | zinc finger protein 36, C3H type-like 1 | 1094 | 1081 | 1068 |
| 12193 Zfp36I2  | zinc finger protein 36, C3H type-like 2 | 812  | 804  | 775  |
| 333473 Zfp36I3 | zinc finger protein 36, C3H type-like 3 | 46   | 45   | 43   |
| 22696 Zfp37    | zinc finger protein 37                  | 177  | 180  | 176  |
| 233060 Zfp382  | zinc finger protein 382                 | 100  | 99   | 99   |
| 269800 Zfp384  | zinc finger protein 384                 | 56   | 51   | 56   |
| 56220 Zfp386   | zinc finger protein 386 (Kruppel-like)  | 3183 | 3236 | 3164 |
| 22698 Zfp39    | zinc finger protein 39                  | 66   | 70   | 67   |
| 69256 Zfp397   | zinc finger protein 397                 | 238  | 224  | 227  |
| 22701 Zfp41    | zinc finger protein 41                  | 103  | 96   | 102  |
| 52708 Zfp410   | zinc finger protein 410                 | 90   | 98   | 95   |
| 328801 Zfp414  | zinc finger protein 414                 | 117  | 105  | 108  |
| 22702 Zfp42    | zinc finger protein 42                  | 461  | 455  | 427  |
| 67255 Zfp422   | zinc finger protein 422                 | 81   | 93   | 87   |
| 94187 Zfp423   | zinc finger protein 423                 | 716  | 699  | 686  |
| 235028 Zfp426  | zinc finger protein 426                 | 74   | 82   | 78   |
| 240186 Zfp438  | zinc finger protein 438                 | 691  | 708  | 693  |
| 72667 Zfp444   | zinc finger protein 444                 | 49   | 52   | 52   |
| 235682 Zfp445  | zinc finger protein 445                 | 107  | 110  | 110  |
| 269870 Zfp446  | zinc finger protein 446                 | 43   | 36   | 37   |
| 78619 Zfp449   | zinc finger protein 449                 | 202  | 194  | 176  |
| 98403 Zfp451   | zinc finger protein 451                 | 104  | 105  | 99   |
| 22704 Zfp46    | zinc finger protein 46                  | 86   | 83   | 82   |
| 242466 Zfp462  | zinc finger protein 462                 | 1929 | 1975 | 1956 |
| 68910 Zfp467   | zinc finger protein 467                 | 63   | 62   | 68   |
| 243963 Zfp473  | zinc finger protein 473                 | 44   | 45   | 42   |
| 382867 Zfp488  | zinc finger protein 488                 | 124  | 108  | 111  |
| 666311 Zfp498  | zinc finger protein 498                 | 136  | 140  | 152  |
| 218820 Zfp503  | zinc finger protein 503                 | 212  | 223  | 210  |
| 668501 Zfp507  | zinc finger protein 507                 | 1149 | 1156 | 1129 |
| 69752 Zfp511   | zinc finger protein 511                 | 16   | 15   | 15   |
| 269639 Zfp512  | zinc finger protein 512                 | 255  | 254  | 245  |
| 101023 Zfp513  | zinc finger protein 513                 | 34   | 34   | 32   |
| 329003 Zfp516  | zinc finger protein 516                 | 287  | 278  | 299  |
| 72672 Zfp518a  | zinc finger protein 518A                | 210  | 221  | 211  |
| 100515 Zfp518b | zinc finger protein 518B                | 410  | 388  | 410  |
| 225207 Zfp521  | zinc finger protein 521                 | 2126 | 2161 | 2117 |
| 224656 Zfp523  | zinc finger protein 523                 | 77   | 75   | 82   |
| 66056 Zfp524   | zinc finger protein 524                 | 7    | 5    | 5    |
| 210172 Zfp526  | zinc finger protein 526                 | 18   | 19   | 24   |
| 328977 Zfp532  | zinc finger protein 532                 | 347  | 349  | 351  |
| 243937 Zfp536  | zinc finger protein 536                 | 1684 | 1695 | 1719 |
| 666528 Zfp541  | zinc finger protein 541                 | 128  | 125  | 124  |
| 233887 Zfp553  | zinc finger protein 553                 | 10   | 13   | 15   |
| 22715 Zfp57    | zinc finger protein 57                  | 47   | 51   | 53   |
| 232976 Zfp574  | zinc finger protein 574                 | 67   | 67   | 71   |
| 101544 Zfp575  | zinc finger protein 575                 | 34   | 31   | 33   |
| 68490 Zfp579   | zinc finger protein 579                 | 52   | 49   | 50   |
| 238693 Zfp58   | zinc finger protein 58                  | 56   | 52   | 53   |
| 68992 Zfp580   | zinc finger protein 580                 | 23   | 24   | 22   |
| 213011 Zfp583  | zinc finger protein 583                 | 97   | 99   | 94   |

|           |         |                                            |      |      |      |
|-----------|---------|--------------------------------------------|------|------|------|
| 233410    | Zfp592  | zinc finger protein 592                    | 144  | 141  | 141  |
| 68040     | Zfp593  | zinc finger protein 593                    | 18   | 17   | 19   |
| 72701     | Zfp618  | zinc fingerprotein 618                     | 689  | 703  | 678  |
| 22720     | Zfp62   | zinc finger protein 62                     | 78   | 69   | 72   |
| 232816    | Zfp628  | zinc finger protein 628                    | 56   | 59   | 62   |
| 320683    | Zfp629  | zinc finger protein 629                    | 130  | 131  | 127  |
| 67778     | Zfp639  | zinc finger protein 639                    | 45   | 45   | 50   |
| 22722     | Zfp64   | zinc finger protein 64                     | 1131 | 1102 | 1133 |
| 239652    | Zfp641  | zinc finger protein 641                    | 72   | 72   | 70   |
| 239546    | Zfp647  | zinc finger protein 647                    | 57   | 55   | 51   |
| 268469    | Zfp652  | zinc finger protein 652                    | 132  | 138  | 142  |
| 319601    | Zfp653  | zinc finger protein 653                    | 45   | 40   | 45   |
| 72020     | Zfp654  | zinc finger protein 654                    | 110  | 98   | 98   |
| 72180     | Zfp661  | zinc finger protein 661                    | 61   | 61   | 62   |
| 269704    | Zfp664  | zinc finger protein 664                    | 187  | 182  | 186  |
| 384763    | Zfp667  | zinc finger protein 667                    | 96   | 94   | 99   |
| 244219    | Zfp668  | zinc finger protein 668                    | 44   | 45   | 45   |
| 319475    | Zfp672  | zinc finger protein 672                    | 30   | 26   | 26   |
| 78266     | Zfp687  | zinc finger protein 687                    | 83   | 90   | 87   |
| 71131     | Zfp689  | zinc finger protein 689                    | 62   | 62   | 59   |
| 195522    | Zfp691  | zinc finger protein 691                    | 105  | 102  | 99   |
| 103836    | Zfp692  | zinc finger protein 692                    | 145  | 135  | 143  |
| 242109    | Zfp697  | zinc finger protein 697                    | 217  | 222  | 214  |
| 353310    | Zfp703  | zinc finger protein 703                    | 1120 | 1102 | 1100 |
| 209225    | Zfp710  | zinc finger protein 710                    | 231  | 238  | 230  |
| 245595    | Zfp711  | zinc finger protein 711                    | 233  | 223  | 223  |
| 72723     | Zfp74   | zinc finger protein 74                     | 103  | 103  | 93   |
| 68744     | Zfp740  | zinc finger protein 740                    | 60   | 52   | 52   |
| 69228     | Zfp746  | zinc finger protein 746                    | 443  | 463  | 446  |
| 233890    | Zfp768  | zinc finger protein 768                    | 97   | 101  | 99   |
| 228491    | Zfp770  | zinc finger protein 770                    | 610  | 608  | 596  |
| 244216    | Zfp771  | zinc finger protein 771                    | 30   | 35   | 34   |
| 243372    | Zfp775  | zinc finger protein 775                    | 42   | 43   | 46   |
| 654801    | Zfp784  | zinc finger protein 784                    | 31   | 37   | 34   |
| 330301    | Zfp786  | zinc finger protein 786                    | 27   | 29   | 28   |
| 67109     | Zfp787  | zinc finger protein 787                    | 159  | 158  | 164  |
| 627049    | Zfp800  | zinc finger protein 800                    | 360  | 364  | 358  |
| 330502    | Zfp82   | zinc finger protein 82                     | 52   | 51   | 51   |
| 75871     | Zfp821  | zinc finger protein 821                    | 57   | 58   | 60   |
| 622675    | Zfp827  | zinc finger protein 827                    | 555  | 550  | 537  |
| 319748    | Zfp865  | zinc finger protein 865                    | 27   | 25   | 27   |
| 214779    | Zfp879  | zinc finger protein 879                    | 29   | 27   | 30   |
| 22751     | Zfp90   | zinc finger protein 90                     | 229  | 225  | 214  |
| 109910    | Zfp91   | zinc finger protein 91                     | 34   | 40   | 36   |
| 22754     | Zfp92   | zinc finger protein 92                     | 112  | 102  | 104  |
| 22755     | Zfp93   | zinc finger protein 93                     | 52   | 54   | 53   |
| 22761     | Zfpm1   | zinc finger protein, multitype 1           | 514  | 486  | 510  |
| 22762     | Zfpm2   | zinc finger protein, multitype 2           | 1897 | 1908 | 1880 |
| 22764     | Zfx     | zinc finger protein X-linked               | 304  | 295  | 293  |
| 22767     | Zfy1    | zinc finger protein 1, Y linked            | 347  | 341  | 330  |
| 22768     | Zfy2    | zinc finger protein 2, Y linked            | 1284 | 1243 | 1258 |
| 211978    | Zfyve26 | zinc finger, FYVE domain containing 26     | 120  | 122  | 115  |
| 100009600 | Zglp1   | zinc finger, GATA-like protein 1           | 52   | 53   | 50   |
| 229007    | Zgpat   | zinc finger, CCCH-type with G patch domain | 87   | 77   | 77   |
| 22770     | Zhx1    | zinc fingers and homeoboxes 1              | 127  | 134  | 120  |

|           |          |                                                                     |      |      |      |
|-----------|----------|---------------------------------------------------------------------|------|------|------|
| 387609    | Zhx2     | zinc fingers and homeoboxes 2                                       | 513  | 539  | 523  |
| 320799    | Zhx3     | zinc fingers and homeoboxes 3                                       | 183  | 187  | 189  |
| 22771     | Zic1     | zinc finger protein of the cerebellum 1                             | 1365 | 1377 | 1392 |
| 22773     | Zic3     | zinc finger protein of the cerebellum 3                             | 1758 | 1756 | 1694 |
| 65100     | Zic5     | zinc finger protein of the cerebellum 5                             | 26   | 24   | 28   |
| 22775     | Zik1     | zinc finger protein interacting with K protein 1                    | 103  | 102  | 106  |
| 74570     | Zkscan1  | zinc finger with KRAB and SCAN domains 1                            | 106  | 100  | 112  |
| 67235     | Zkscan14 | zinc finger with KRAB and SCAN domains 14                           | 16   | 19   | 16   |
| 100041581 | Zkscan16 | zinc finger with KRAB and SCAN domains 16                           | 96   | 104  | 96   |
| 268417    | Zkscan17 | zinc finger with KRAB and SCAN domains 17                           | 47   | 49   | 50   |
| 72739     | Zkscan3  | zinc finger with KRAB and SCAN domains 3                            | 100  | 100  | 97   |
| 544922    | Zkscan4  | zinc finger with KRAB and SCAN domains 4                            | 52   | 47   | 50   |
| 22757     | Zkscan5  | zinc finger with KRAB and SCAN domains 5                            | 41   | 38   | 41   |
| 52712     | Zkscan6  | zinc finger with KRAB and SCAN domains 6                            | 481  | 490  | 490  |
| 67178     | Zmat5    | zinc finger, matrin type 5                                          | 63   | 62   | 59   |
| 328365    | Zmiz1    | zinc finger, MIZ-type containing 1                                  | 1324 | 1337 | 1345 |
| 52915     | Zmiz2    | zinc finger, MIZ-type containing 2                                  | 171  | 171  | 176  |
| 230709    | Zmpste24 | zinc metalloproteinase, STE24 homolog ( <i>S. cerevisiae</i> )      | 92   | 97   | 94   |
| 76007     | Zmym2    | zinc finger, MYM-type 2                                             | 308  | 319  | 314  |
| 574428    | Zmynd15  | zinc finger, MYND-type containing 15                                | 11   | 9    | 9    |
| 228880    | Zmynd8   | zinc finger, MYND-type containing 8                                 | 452  | 432  | 436  |
| 66136     | Znrd1    | zinc ribbon domain containing, 1                                    | 9    | 7    | 8    |
| 22788     | Zp3      | zona pellucida glycoprotein 3                                       | 27   | 25   | 31   |
| 360216    | Zranb1   | zinc finger, RAN-binding domain containing 1                        | 196  | 203  | 204  |
| 53861     | Zranb2   | zinc finger, RAN-binding domain containing 2                        | 1261 | 1299 | 1260 |
| 22184     | Zrsr2    | zinc finger (CCCH type), RNA binding motif and serine/arginine ricl | 146  | 139  | 130  |
| 332221    | Zscan10  | zinc finger and SCAN domain containing 10                           | 61   | 58   | 62   |
| 22758     | Zscan12  | zinc finger and SCAN domain containing 12                           | 70   | 69   | 69   |
| 232875    | Zscan18  | zinc finger and SCAN domain containing 18                           | 101  | 109  | 103  |
| 22691     | Zscan2   | zinc finger and SCAN domain containing 2                            | 122  | 125  | 127  |
| 269585    | Zscan20  | zinc finger and SCAN domains 20                                     | 463  | 465  | 460  |
| 22697     | Zscan21  | zinc finger and SCAN domain containing 21                           | 101  | 92   | 95   |
| 232878    | Zscan22  | zinc finger and SCAN domain containing 22                           | 52   | 54   | 55   |
| 99334     | Zscan29  | zinc finger SCAN domains 29                                         | 34   | 39   | 34   |
| 328918    | Zscan30  | zinc finger and SCAN domain containing 30                           | 48   | 44   | 44   |
| 665780    | Zscan4b  | zinc finger and SCAN domain containing 4B                           | 271  | 271  | 277  |
| 245109    | Zscan4c  | zinc finger and SCAN domain containing 4C                           | 337  | 347  | 339  |
| 545913    | Zscan4d  | zinc finger and SCAN domain containing 4D                           | 398  | 407  | 400  |
| 665848    | Zscan4e  | zinc finger and SCAN domain containing 4E                           | 302  | 323  | 305  |
| 665902    | Zscan4f  | zinc finger and SCAN domain containing 4F                           | 464  | 472  | 466  |
| 170734    | Zscan5b  | zinc finger and SCAN domain containing 5B                           | 71   | 72   | 73   |
| 71861     | Zswim2   | zinc finger, SWIM domain containing 2                               | 175  | 177  | 179  |
| 69747     | Zswim7   | zinc finger, SWIM-type containing 7                                 | 39   | 39   | 40   |
| 668166    | Zxdb     | zinc finger, X-linked, duplicated B                                 | 191  | 198  | 194  |
| 80292     | Zxdc     | ZXD family zinc finger C                                            | 121  | 120  | 123  |
| 108946    | Zzz3     | zinc finger, ZZ domain containing 3                                 | 413  | 418  | 424  |
