# Supplementary material
Source: PubMed Central journal article supplement (PMC4439875)
Supplement: bph0172-2782-sd7.pdf [file bph0172-2782-sd7.pdf]

**SUPPLEMENTARY TABLE 3. Targeted analysis of metabolic genes.**

Genes identified within enriched GO metabolic terms with nucleosome number for LF, HF and HF+NaB. Only those genes with the same nucleosome number between LF and HF+NaB, but  $\geq 2$  nucleosome number difference from HF are listed. Genes are listed in alphabetical order by gene description.

| EntrezID | Gene Symbol | Gene Description                                                       | LF  | HF  | HF+NaB |
|----------|-------------|------------------------------------------------------------------------|-----|-----|--------|
| 56794    | Hacl1       | 2-hydroxyacyl-CoA lyase 1                                              | 83  | 76  | 83     |
| 66627    | Ogfod2      | 2-oxoglutarate and iron-dependent oxygenase domain cont                | 22  | 24  | 22     |
| 227095   | Hibch       | 3-hydroxyisobutyryl-Coenzyme A hydrolase                               | 177 | 180 | 177    |
| 67432    | Hoga1       | 4-hydroxy-2-oxoglutarate aldolase 1                                    | 22  | 19  | 22     |
| 242642   | Hpd1        | 4-hydroxyphenylpyruvate dioxygenase-like                               | 89  | 85  | 89     |
| 382007   | Adam26b     | a disintegrin and metallopeptidase domain 26B                          | 346 | 356 | 346    |
| 353188   | Adam32      | a disintegrin and metallopeptidase domain 32                           | 239 | 243 | 239    |
| 279028   | Adamts13    | a disintegrin-like and metallopeptidase (reprolysin type) with         | 58  | 60  | 58     |
| 108153   | Adamts7     | a disintegrin-like and metallopeptidase (reprolysin type) with         | 197 | 200 | 197    |
| 101401   | Adamts9     | a disintegrin-like and metallopeptidase (reprolysin type) with         | 298 | 302 | 298    |
| 113868   | Acaa1a      | acetyl-Coenzyme A acyltransferase 1A                                   | 20  | 24  | 20     |
| 226250   | Afap1l2     | actin filament associated protein 1-like 2                             | 315 | 325 | 315    |
| 11538    | Adnp        | activity-dependent neuroprotective protein                             | 191 | 183 | 191    |
| 233799   | Acsm2       | acyl-CoA synthetase medium-chain family member 2                       | 129 | 131 | 129    |
| 80911    | Acox3       | acyl-Coenzyme A oxidase 3, pristanoyl                                  | 136 | 130 | 136    |
| 114896   | Afg3l1      | AFG3(ATPase family gene 3)-like 1 (yeast)                              | 92  | 94  | 92     |
| 11611    | Agxt        | alanine-glyoxylate aminotransferase                                    | 74  | 76  | 74     |
| 79459    | Aldoart2    | aldolase 1 A retrogene 2                                               | 139 | 134 | 139    |
| 245847   | Amdhd2      | amidohydrolase domain containing 2                                     | 37  | 35  | 37     |
| 235386   | Agphd1      | aminoglycoside phosphotransferase domain containing 1                  | 108 | 110 | 108    |
| 17025    | Alad        | aminolevulinate, delta-, dehydratase                                   | 26  | 29  | 26     |
| 14797    | Aes         | amino-terminal enhancer of split                                       | 34  | 32  | 34     |
| 11820    | App         | amyloid beta (A4) precursor protein                                    | 911 | 931 | 911    |
| 11730    | Ang3        | angiogenin, ribonuclease A family, member 3                            | 43  | 45  | 43     |
| 11607    | Agtr1a      | angiotensin II receptor, type 1a                                       | 516 | 520 | 516    |
| 103161   | Apof        | apolipoprotein F                                                       | 23  | 20  | 23     |
| 11690    | Alox5ap     | arachidonate 5-lipoxygenase activating protein                         | 268 | 260 | 268    |
| 57344    | As3mt       | arsenic (+3 oxidation state) methyltransferase                         | 91  | 94  | 91     |
| 68865    | Arv1        | ARV1 homolog (yeast)                                                   | 41  | 38  | 41     |
| 11865    | Arntl       | aryl hydrocarbon receptor nuclear translocator-like                    | 539 | 541 | 539    |
| 67758    | Aadac       | arylacetamide deacetylase (esterase)                                   | 85  | 91  | 85     |
| 11298    | Aanat       | arylalkylamine N-acetyltransferase                                     | 55  | 52  | 55     |
| 102580   | Alg9        | asparagine-linked glycosylation 9 homolog (yeast, alpha 1,2            | 114 | 105 | 114    |
| 110616   | Atxn3       | ataxin 3                                                               | 82  | 84  | 82     |
| 28080    | Atp5o       | ATP synthase, H <sup>+</sup> transporting, mitochondrial F1 complex, C | 420 | 422 | 420    |
| 76223    | Agbl3       | ATP/GTP binding protein-like 3                                         | 188 | 190 | 188    |
| 231093   | Agbl5       | ATP/GTP binding protein-like 5                                         | 48  | 51  | 48     |
| 11983    | Atpif1      | ATPase inhibitory factor 1                                             | 30  | 36  | 30     |
| 74104    | Abcb6       | ATP-binding cassette, sub-family B (MDR/TAP), member 6                 | 26  | 30  | 26     |
| 12053    | Bcl6        | B-cell leukemia/lymphoma 6                                             | 585 | 604 | 585    |
| 12028    | Bax         | BCL2-associated X protein                                              | 34  | 32  | 34     |
| 20997    | T           | brachyury                                                              | 563 | 543 | 563    |
| 210766   | Brcc3       | BRCA1/BRCA2-containing complex, subunit 3                              | 111 | 118 | 111    |
| 12229    | Btk         | Bruton agammaglobulinemia tyrosine kinase                              | 54  | 51  | 54     |
| 232430   | Crebl2      | cAMP responsive element binding protein-like 2                         | 123 | 127 | 123    |
| 59031    | Chst12      | carbohydrate sulfotransferase 12                                       | 188 | 180 | 188    |

|        |          |                                                           |     |     |     |
|--------|----------|-----------------------------------------------------------|-----|-----|-----|
| 76459  | Car12    | carbonic anhydrase 12                                     | 267 | 258 | 267 |
| 72361  | Ces2g    | carboxylesterase 2G                                       | 129 | 125 | 129 |
| 70574  | Cpm      | carboxypeptidase M                                        | 431 | 435 | 431 |
| 80794  | Cblc     | Casitas B-lineage lymphoma c                              | 65  | 68  | 65  |
| 12371  | Casp9    | caspase 9                                                 | 44  | 47  | 44  |
| 214932 | Cecr5    | cat eye syndrome chromosome region, candidate 5 homolog   | 224 | 228 | 224 |
| 13035  | Ctsg     | cathepsin G                                               | 44  | 48  | 44  |
| 13038  | Ctsk     | cathepsin K                                               | 120 | 122 | 120 |
| 72068  | Cnot2    | CCR4-NOT transcription complex, subunit 2                 | 541 | 539 | 541 |
| 69125  | Cnot8    | CCR4-NOT transcription complex, subunit 8                 | 211 | 202 | 211 |
| 70333  | Cd3eap   | CD3E antigen, epsilon polypeptide associated protein      | 22  | 18  | 22  |
| 226751 | Cdc42bpa | CDC42 binding protein kinase alpha                        | 490 | 493 | 490 |
| 68379  | Ciz1     | CDKN1A interacting zinc finger protein 1                  | 34  | 31  | 34  |
| 226527 | BC026585 | cDNA sequence BC026585                                    | 125 | 116 | 125 |
| 99151  | Cercam   | cerebral endothelial cell adhesion molecule               | 59  | 55  | 59  |
| 12647  | Chat     | choline acetyltransferase                                 | 68  | 66  | 68  |
| 12651  | Chkb     | choline kinase beta                                       | 34  | 32  | 34  |
| 99712  | Cept1    | choline/ethanolaminephosphotransferase 1                  | 76  | 84  | 76  |
| 27221  | Chaf1a   | chromatin assembly factor 1, subunit A (p150)             | 51  | 54  | 51  |
| 30951  | Cbx8     | chromobox homolog 8 (Drosophila Pc class)                 | 71  | 67  | 71  |
| 66473  | Ctrb1    | chymotrypsinogen B1                                       | 119 | 117 | 119 |
| 269582 | Clspn    | claspin homolog (Xenopus laevis)                          | 101 | 95  | 101 |
| 59035  | Carm1    | coactivator-associated arginine methyltransferase 1       | 90  | 82  | 90  |
| 14068  | F7       | coagulation factor VII                                    | 114 | 108 | 114 |
| 71743  | Coasy    | Coenzyme A synthase                                       | 10  | 12  | 10  |
| 227683 | Coq4     | coenzyme Q4 homolog (yeast)                               | 20  | 22  | 20  |
| 58202  | Cobra1   | cofactor of BRCA1                                         | 23  | 18  | 23  |
| 12696  | Cirbp    | cold inducible RNA binding protein                        | 26  | 29  | 26  |
| 109791 | Clps     | colipase, pancreatic                                      | 38  | 33  | 38  |
| 12263  | C2       | complement component 2 (within H-2S)                      | 42  | 48  | 42  |
| 26891  | Cops4    | COP9 (constitutive photomorphogenic) homolog, subunit 4 ( | 92  | 101 | 92  |
| 12953  | Cry2     | cryptochrome 2 (photolyase-like)                          | 76  | 73  | 76  |
| 13048  | Cux2     | cut-like homeobox 2                                       | 319 | 316 | 319 |
| 12537  | Cdk11b   | cyclin-dependent kinase 11B                               | 66  | 68  | 66  |
| 228714 | Csrp2bp  | cysteine and glycine-rich protein 2 binding protein       | 115 | 119 | 115 |
| 83429  | Ctns     | cystinosis, nephropathic                                  | 31  | 29  | 31  |
| 225912 | Cybas3   | cytochrome b, ascorbate dependent 3                       | 35  | 37  | 35  |
| 13098  | Cyp2c39  | cytochrome P450, family 2, subfamily c, polypeptide 39    | 233 | 241 | 233 |
| 13107  | Cyp2f2   | cytochrome P450, family 2, subfamily f, polypeptide 2     | 162 | 167 | 162 |
| 13109  | Cyp2j5   | cytochrome P450, family 2, subfamily j, polypeptide 5     | 255 | 252 | 255 |
| 71519  | Cyp2u1   | cytochrome P450, family 2, subfamily u, polypeptide 1     | 91  | 89  | 91  |
| 13096  | Cyp2c37  | cytochrome P450, family 2. subfamily c, polypeptide 37    | 237 | 244 | 237 |
| 13194  | Ddb1     | damage specific DNA binding protein 1                     | 39  | 34  | 39  |
| 74351  | Ddx23    | DEAD (Asp-Glu-Ala-Asp) box polypeptide 23                 | 58  | 55  | 58  |
| 13207  | Ddx5     | DEAD (Asp-Glu-Ala-Asp) box polypeptide 5                  | 5   | 7   | 5   |
| 13211  | Dhx9     | DEAH (Asp-Glu-Ala-His) box polypeptide 9                  | 175 | 165 | 175 |
| 69305  | Dcps     | decapping enzyme, scavenger                               | 109 | 104 | 109 |
| 68087  | Dcakd    | dephospho-CoA kinase domain containing                    | 79  | 83  | 79  |
| 109620 | Dsp      | desmoplakin                                               | 214 | 216 | 214 |
| 13544  | Dvl3     | dishevelled 3, dsh homolog (Drosophila)                   | 44  | 42  | 44  |
| 55947  | Dclre1a  | DNA cross-link repair 1A, PSO2 homolog (S. cerevisiae)    | 112 | 121 | 112 |
| 71712  | Dram1    | DNA-damage regulated autophagy modulator 1                | 233 | 238 | 233 |

|        |         |                                                                          |     |     |     |
|--------|---------|--------------------------------------------------------------------------|-----|-----|-----|
| 58233  | Dnaja4  | DnaJ (Hsp40) homolog, subfamily A, member 4                              | 90  | 94  | 90  |
| 27389  | Dusp13  | dual specificity phosphatase 13                                          | 55  | 53  | 55  |
| 83965  | Enpp5   | ectonucleotide pyrophosphatase/phosphodiesterase 5                       | 200 | 197 | 200 |
| 50701  | Elane   | elastase, neutrophil expressed                                           | 14  | 12  | 14  |
| 106389 | Eaf2    | ELL associated factor 2                                                  | 148 | 144 | 148 |
| 14791  | Emg1    | EMG1 nucleolar protein homolog ( <i>S. cerevisiae</i> )                  | 67  | 65  | 67  |
| 13587  | Ear2    | eosinophil-associated, ribonuclease A family, member 2                   | 130 | 132 | 130 |
| 386655 | Eid2    | EP300 interacting inhibitor of differentiation 2                         | 121 | 128 | 121 |
| 13836  | Epha2   | Eph receptor A2                                                          | 158 | 154 | 158 |
| 13684  | Eif4e   | eukaryotic translation initiation factor 4E                              | 49  | 51  | 49  |
| 208691 | Eif5a2  | eukaryotic translation initiation factor 5A2                             | 131 | 138 | 131 |
| 211651 | Fancd2  | Fanconi anemia, complementation group D2                                 | 91  | 94  | 91  |
| 13163  | Daxx    | Fas death domain-associated protein                                      | 30  | 32  | 30  |
| 69577  | Fastkd3 | FAST kinase domains 3                                                    | 20  | 22  | 20  |
| 50754  | Fbxw7   | F-box and WD-40 domain protein 7                                         | 558 | 560 | 558 |
| 230903 | Fbxo44  | F-box protein 44                                                         | 7   | 9   | 7   |
| 231630 | Ficd    | FIC domain containing                                                    | 61  | 57  | 61  |
| 14225  | Fkbp1a  | FK506 binding protein 1a                                                 | 104 | 99  | 104 |
| 14313  | Fst     | follistatin                                                              | 530 | 549 | 530 |
| 15377  | Foxa3   | forkhead box A3                                                          | 28  | 25  | 28  |
| 74123  | Foxp4   | forkhead box P4                                                          | 336 | 322 | 336 |
| 14239  | Foxs1   | forkhead box S1                                                          | 50  | 48  | 50  |
| 238024 | Fn3krp  | fructosamine 3 kinase related protein                                    | 66  | 62  | 66  |
| 68126  | Fahd2a  | fumarylacetoacetate hydrolase domain containing 2A                       | 74  | 76  | 74  |
| 28030  | Gfm1    | G elongation factor, mitochondrial 1                                     | 113 | 109 | 113 |
| 14772  | Grk4    | G protein-coupled receptor kinase 4                                      | 131 | 133 | 131 |
| 26431  | Git2    | G protein-coupled receptor kinase-interactor 2                           | 81  | 86  | 81  |
| 74246  | Gale    | galactose-4-epimerase, UDP                                               | 31  | 28  | 31  |
| 11605  | Gla     | galactosidase, alpha                                                     | 17  | 20  | 17  |
| 207182 | Ggt7    | gamma-glutamyltransferase 7                                              | 100 | 103 | 100 |
| 331026 | Gmppb   | GDP-mannose pyrophosphorylase B                                          | 67  | 64  | 67  |
| 209357 | Gtf2h3  | general transcription factor IIH, polypeptide 3                          | 27  | 29  | 27  |
| 233863 | Gtf3c1  | general transcription factor III C 1                                     | 134 | 136 | 134 |
| 26384  | Gnpda1  | glucosamine-6-phosphate deaminase 1                                      | 164 | 159 | 164 |
| 14377  | G6pc    | glucose-6-phosphatase, catalytic                                         | 115 | 113 | 115 |
| 328232 | Gfod1   | glucose-fructose oxidoreductase domain containing 1                      | 256 | 265 | 256 |
| 14415  | Gad1    | glutamic acid decarboxylase 1                                            | 192 | 196 | 192 |
| 76282  | Gpt     | glutamic pyruvic transaminase, soluble                                   | 33  | 37  | 33  |
| 14858  | Gsta2   | glutathione S-transferase, alpha 2 ( <i>Yc2</i> )                        | 55  | 51  | 55  |
| 14863  | Gstm2   | glutathione S-transferase, mu 2                                          | 65  | 59  | 65  |
| 14869  | Gstp2   | glutathione S-transferase, pi 2                                          | 30  | 28  | 30  |
| 103140 | Gstt3   | glutathione S-transferase, theta 3                                       | 33  | 37  | 33  |
| 14433  | Gapdh   | glyceraldehyde-3-phosphate dehydrogenase                                 | 53  | 47  | 53  |
| 14626  | Gk2     | glycerol kinase 2                                                        | 807 | 795 | 807 |
| 68133  | Gcsh    | glycine cleavage system protein H (aminomethyl carrier)                  | 137 | 130 | 137 |
| 71103  | Glt6d1  | glycosyltransferase 6 domain containing 1                                | 63  | 60  | 63  |
| 11692  | Gfer    | growth factor, erv1 ( <i>S. cerevisiae</i> )-like (augmenter of liver re | 6   | 8   | 6   |
| 14710  | Gngt2   | guanine nucleotide binding protein (G protein), gamma trans              | 117 | 115 | 117 |
| 14917  | Gucy2c  | guanylate cyclase 2c                                                     | 176 | 186 | 176 |
| 15372  | Hmx2    | H6 homeobox 2                                                            | 17  | 19  | 17  |
| 72748  | Hdhd3   | haloacid dehalogenase-like hydrolase domain containing 3                 | 50  | 54  | 50  |
| 15510  | Hspd1   | heat shock protein 1 (chaperonin)                                        | 45  | 43  | 45  |

|                   |                                                             |     |     |     |
|-------------------|-------------------------------------------------------------|-----|-----|-----|
| 15381 Hnrnpc      | heterogeneous nuclear ribonucleoprotein C                   | 56  | 58  | 56  |
| 212032 Hk3        | hexokinase 3                                                | 193 | 189 | 193 |
| 234219 Helt       | Hey-like transcription factor (zebrafish)                   | 330 | 322 | 330 |
| 15353 Hmg20b      | high mobility group 20 B                                    | 14  | 18  | 14  |
| 107435 Hat1       | histone aminotransferase 1                                  | 110 | 116 | 110 |
| 15425 Hoxc6       | homeobox C6                                                 | 28  | 25  | 28  |
| 15258 Hipk2       | homeodomain interacting protein kinase 2                    | 367 | 365 | 367 |
| 15259 Hipk3       | homeodomain interacting protein kinase 3                    | 207 | 202 | 207 |
| 239099 Homez      | homeodomain leucine zipper-encoding gene                    | 130 | 132 | 130 |
| 215114 Hip1       | huntingtin interacting protein 1                            | 222 | 211 | 222 |
| 15493 Hsd3b2      | hydroxy-delta-5-steroid dehydrogenase, 3 beta- and steroid  | 145 | 158 | 145 |
| 15452 Hprt        | hypoxanthine guanine phosphoribosyl transferase             | 162 | 177 | 162 |
| 16151 Ikbkg       | inhibitor of kappaB kinase gamma                            | 161 | 150 | 161 |
| 114663 Impa2      | inositol (myo)-1(or 4)-monophosphatase 2                    | 127 | 119 | 127 |
| 16337 Insr        | insulin receptor                                            | 799 | 806 | 799 |
| 229543 Ints3      | integrator complex subunit 3                                | 100 | 91  | 100 |
| 109077 Ints5      | integrator complex subunit 5                                | 10  | 12  | 10  |
| 16398 Itga2       | integrin alpha 2                                            | 344 | 363 | 344 |
| 54131 Irf3        | interferon regulatory factor 3                              | 22  | 19  | 22  |
| 16180 Il1rap      | interleukin 1 receptor accessory protein                    | 581 | 592 | 581 |
| 16186 Il2rg       | interleukin 2 receptor, gamma chain                         | 14  | 12  | 14  |
| 381314 Iars2      | isoleucine-tRNA synthetase 2, mitochondrial                 | 21  | 23  | 21  |
| 108829 Jmjd1c     | jumonji domain containing 1C                                | 236 | 244 | 236 |
| 18050 Kik1b3      | kallikrein 1-related peptidase b3                           | 21  | 25  | 21  |
| 16622 Kik1b5      | kallikrein 1-related peptidase b5                           | 24  | 27  | 24  |
| 16542 Kdr         | kinase insert domain protein receptor                       | 763 | 789 | 763 |
| 16591 Kl          | klotho                                                      | 670 | 665 | 670 |
| 21847 Klf10       | Kruppel-like factor 10                                      | 383 | 395 | 383 |
| 66277 Klf15       | Kruppel-like factor 15                                      | 156 | 144 | 156 |
| 235435 Lctl       | lactase-like                                                | 204 | 199 | 204 |
| 93898 Lass1       | LAG1 homolog, ceramide synthase 1                           | 17  | 19  | 17  |
| 107515 Lgr4       | leucine-rich repeat-containing G protein-coupled receptor 4 | 130 | 138 | 130 |
| 17001 Ltc4s       | leukotriene C4 synthase                                     | 90  | 83  | 90  |
| 16909 Lmo2        | LIM domain only 2                                           | 310 | 328 | 310 |
| 64899 Lpin3       | lipin 3                                                     | 66  | 64  | 66  |
| 16803 Lbp         | lipopolysaccharide binding protein                          | 135 | 138 | 135 |
| 16956 Lpl         | lipoprotein lipase                                          | 371 | 368 | 371 |
| 78913 Ltn1        | listerin E3 ubiquitin protein ligase 1                      | 110 | 115 | 110 |
| 16973 Lrp5        | low density lipoprotein receptor-related protein 5          | 167 | 163 | 167 |
| 67684 Luc7l3      | LUC7-like 3 (S. cerevisiae)                                 | 117 | 112 | 117 |
| 70902 Lpcat2b     | lysophosphatidylcholine acyltransferase 2B                  | 124 | 118 | 124 |
| 17105 Lyz2        | lysozyme 2                                                  | 68  | 75  | 68  |
| 15235 Mst1        | macrophage stimulating 1 (hepatocyte growth factor-like)    | 20  | 18  | 20  |
| 17195 Mbl2        | mannose-binding lectin (protein C) 2                        | 456 | 461 | 456 |
| 73744 Man2c1      | mannosidase, alpha, class 2C, member 1                      | 92  | 89  | 92  |
| 17346 Mknk1       | MAP kinase-interacting serine/threonine kinase 1            | 74  | 72  | 74  |
| 433586 Maml3      | mastermind like 3 (Drosophila)                              | 780 | 767 | 780 |
| 17285 Meox1       | mesenchyme homeobox 1                                       | 229 | 239 | 229 |
| 17768 Mthfd2      | methylenetetrahydrofolate dehydrogenase (NAD+ depende       | 118 | 121 | 118 |
| 72096 Mettl10     | methyltransferase like 10                                   | 58  | 62  | 58  |
| 387191 Mir196a-1  | microRNA 196a-1                                             | 24  | 22  | 24  |
| 723965 Mirlet7a-2 | microRNA let7a-2                                            | 64  | 67  | 64  |

|        |         |                                                              |      |      |      |
|--------|---------|--------------------------------------------------------------|------|------|------|
| 70478  | Mipep   | mitochondrial intermediate peptidase                         | 345  | 350  | 345  |
| 66845  | Mrpl33  | mitochondrial ribosomal protein L33                          | 226  | 221  | 226  |
| 66973  | Mrps18b | mitochondrial ribosomal protein S18B                         | 7    | 9    | 7    |
| 76784  | Mtif2   | mitochondrial translational initiation factor 2              | 43   | 41   | 43   |
| 26417  | Mapk3   | mitogen-activated protein kinase 3                           | 80   | 78   | 80   |
| 50772  | Mapk6   | mitogen-activated protein kinase 6                           | 126  | 122  | 126  |
| 26403  | Map3k11 | mitogen-activated protein kinase kinase kinase 11            | 16   | 11   | 16   |
| 26405  | Map3k2  | mitogen-activated protein kinase kinase kinase 2             | 124  | 131  | 124  |
| 26407  | Map3k4  | mitogen-activated protein kinase kinase kinase 4             | 331  | 334  | 331  |
| 18198  | Musk    | muscle, skeletal, receptor tyrosine kinase                   | 299  | 307  | 299  |
| 17188  | Maz     | MYC-associated zinc finger protein (purine-binding transcrip | 21   | 19   | 21   |
| 17874  | Myd88   | myeloid differentiation primary response gene 88             | 47   | 42   | 47   |
| 381022 | Mll2    | myeloid/lymphoid or mixed-lineage leukemia 2                 | 61   | 56   | 61   |
| 238564 | Mylk4   | myosin light chain kinase family, member 4                   | 601  | 603  | 601  |
| 17888  | Myh6    | myosin, heavy polypeptide 6, cardiac muscle, alpha           | 25   | 23   | 25   |
| 217127 | Myst2   | MYST histone acetyltransferase 2                             | 102  | 96   | 102  |
| 70088  | Meaf6   | MYST/Esa1-associated factor 6                                | 83   | 78   | 83   |
| 68043  | N6amt2  | N-6 adenine-specific DNA methyltransferase 2 (putative)      | 178  | 190  | 178  |
| 242864 | Napepld | N-acyl phosphatidylethanolamine phospholipase D              | 117  | 115  | 117  |
| 71950  | Nanog   | Nanog homeobox                                               | 107  | 114  | 107  |
| 234664 | Nae1    | NEDD8 activating enzyme E1 subunit 1                         | 41   | 38   | 41   |
| 17966  | Nbr1    | neighbor of Brca1 gene 1                                     | 40   | 43   | 40   |
| 18010  | Neu1    | neuraminidase 1                                              | 44   | 50   | 44   |
| 56802  | Nespas  | neuroendocrine secretory protein antisense                   | 17   | 15   | 17   |
| 11922  | Neurod6 | neurogenic differentiation 6                                 | 484  | 490  | 484  |
| 225872 | Npas4   | neuronal PAS domain protein 4                                | 81   | 71   | 81   |
| 18211  | Ntrk1   | neurotrophic tyrosine kinase, receptor, type 1               | 31   | 33   | 31   |
| 59125  | Nek7    | NIMA (never in mitosis gene a)-related expressed kinase 7    | 721  | 727  | 721  |
| 18126  | Nos2    | nitric oxide synthase 2, inducible                           | 201  | 206  | 201  |
| 18035  | Nfkbia  | nuclear factor of kappa light polypeptide gene enhancer in B | 212  | 208  | 212  |
| 22259  | Nr1h3   | nuclear receptor subfamily 1, group H, member 3              | 23   | 26   | 23   |
| 20186  | Nr1h4   | nuclear receptor subfamily 1, group H, member 4              | 269  | 265  | 269  |
| 78688  | Nol3    | nucleolar protein 3 (apoptosis repressor with CARD domain)   | 20   | 25   | 20   |
| 68219  | Nudt21  | nudix (nucleoside diphosphate linked moiety X)-type motif 2  | 30   | 33   | 30   |
| 69917  | Obfc2b  | oligonucleotide/oligosaccharide-binding fold containing 2B   | 12   | 15   | 12   |
| 67013  | Oma1    | OMA1 homolog, zinc metallopeptidase (S. cerevisiae)          | 1382 | 1390 | 1382 |
| 107260 | Otub1   | OTU domain, ubiquitin aldehyde binding 1                     | 133  | 130  | 133  |
| 107586 | Ovol2   | ovo-like 2 (Drosophila)                                      | 128  | 131  | 128  |
| 18609  | Pdx1    | pancreatic and duodenal homeobox 1                           | 157  | 147  | 157  |
| 74450  | Pank2   | pantothenate kinase 2                                        | 70   | 74   | 70   |
| 214627 | Papd5   | PAP associated domain containing 5                           | 173  | 171  | 173  |
| 23850  | Pappa2  | pappalysin 2                                                 | 943  | 934  | 943  |
| 18483  | Palm    | paralemmin                                                   | 34   | 38   | 34   |
| 73078  | Pmpcb   | peptidase (mitochondrial processing) beta                    | 108  | 106  | 108  |
| 242377 | Pm20d2  | peptidase M20 domain containing 2                            | 95   | 90   | 95   |
| 18626  | Per1    | period homolog 1 (Drosophila)                                | 35   | 40   | 35   |
| 226169 | Pprc1   | peroxisome proliferative activated receptor, gamma, coactiv. | 42   | 38   | 42   |
| 64934  | Pes1    | pescadillo homolog 1, containing BRCT domain (zebrafish)     | 64   | 71   | 64   |
| 74016  | Phf19   | PHD finger protein 19                                        | 108  | 110  | 108  |
| 68479  | Phf5a   | PHD finger protein 5A                                        | 21   | 23   | 21   |
| 241489 | Pde11a  | phosphodiesterase 11A                                        | 484  | 481  | 484  |
| 70974  | Pgm2l1  | phosphoglucomutase 2-like 1                                  | 104  | 102  | 104  |

|        |         |                                                              |     |     |     |
|--------|---------|--------------------------------------------------------------|-----|-----|-----|
| 30955  | Pik3cg  | phosphoinositide-3-kinase, catalytic, gamma polypeptide      | 401 | 413 | 401 |
| 240752 | Pik3c2b | phosphoinositide-3-kinase, class 2, beta polypeptide         | 135 | 131 | 135 |
| 18778  | Pla2g1b | phospholipase A2, group IB, pancreas                         | 67  | 74  | 67  |
| 18782  | Pla2g2d | phospholipase A2, group IID                                  | 79  | 76  | 79  |
| 329502 | Pla2g4e | phospholipase A2, group IVE                                  | 175 | 178 | 175 |
| 53357  | Pla2g6  | phospholipase A2, group VI                                   | 82  | 79  | 82  |
| 66857  | Plbd1   | phospholipase B domain containing 1                          | 343 | 347 | 343 |
| 71772  | Plbd2   | phospholipase B domain containing 2                          | 38  | 40  | 38  |
| 18830  | Pltp    | phospholipid transfer protein                                | 62  | 58  | 62  |
| 14450  | Gart    | phosphoribosylglycinamide formyltransferase                  | 35  | 39  | 35  |
| 18969  | Pola2   | polymerase (DNA directed), alpha 2                           | 83  | 79  | 83  |
| 18970  | Polb    | polymerase (DNA directed), beta                              | 90  | 88  | 90  |
| 18975  | Polg    | polymerase (DNA directed), gamma                             | 146 | 142 | 146 |
| 73826  | Poldip3 | polymerase (DNA-directed), delta interacting protein 3       | 32  | 35  | 32  |
| 67065  | Polr3d  | polymerase (RNA) III (DNA directed) polypeptide D            | 20  | 18  | 20  |
| 18991  | Pou3f1  | POU domain, class 3, transcription factor 1                  | 999 | 972 | 999 |
| 80720  | Pbx4    | pre-B-cell leukemia homeobox 4                               | 90  | 86  | 90  |
| 1E+08  | Gm2016  | predicted gene 2016                                          | 43  | 46  | 43  |
| 56868  | Psg23   | pregnancy-specific glycoprotein 23                           | 114 | 110 | 114 |
| 19125  | Prodh   | proline dehydrogenase                                        | 91  | 96  | 91  |
| 56742  | Psrc1   | proline/serine-rich coiled-coil 1                            | 61  | 56  | 61  |
| 52830  | Pnrc2   | proline-rich nuclear receptor coactivator 2                  | 48  | 54  | 48  |
| 19214  | Ptgdr   | prostaglandin D receptor                                     | 335 | 343 | 335 |
| 19119  | Prm2    | protamine 2                                                  | 6   | 9   | 6   |
| 22072  | Prss2   | protease, serine, 2                                          | 186 | 179 | 186 |
| 19192  | Psme3   | proteasome (prosome, macropain) 28 subunit, 3                | 31  | 27  | 31  |
| 26441  | Psma4   | proteasome (prosome, macropain) subunit, alpha type 4        | 41  | 47  | 41  |
| 19175  | Psmb6   | proteasome (prosome, macropain) subunit, beta type 6         | 28  | 25  | 28  |
| 16913  | Psmb8   | proteasome (prosome, macropain) subunit, beta type 8 (large) | 22  | 17  | 22  |
| 214572 | Prmt7   | protein arginine N-methyltransferase 7                       | 166 | 157 | 166 |
| 19123  | Proc    | protein C                                                    | 121 | 125 | 121 |
| 75292  | Prkd3   | protein kinase D3                                            | 157 | 159 | 157 |
| 242083 | Ppm1l   | protein phosphatase 1 (formerly 2C)-like                     | 485 | 490 | 485 |
| 218232 | Ptpdc1  | protein tyrosine phosphatase domain containing 1             | 170 | 163 | 170 |
| 19262  | Ptptra  | protein tyrosine phosphatase, receptor type, A               | 178 | 174 | 178 |
| 19267  | Ptpre   | protein tyrosine phosphatase, receptor type, E               | 49  | 51  | 49  |
| 18823  | Plp1    | proteolipid protein (myelin) 1                               | 110 | 108 | 110 |
| 18438  | P2rx4   | purinergic receptor P2X, ligand-gated ion channel 4          | 185 | 171 | 185 |
| 19352  | Rabggtb | RAB geranylgeranyl transferase, b subunit                    | 49  | 43  | 49  |
| 19326  | Rab11b  | RAB11B, member RAS oncogene family                           | 78  | 80  | 78  |
| 19335  | Rab23   | RAB23, member RAS oncogene family                            | 117 | 109 | 117 |
| 19349  | Rab7    | RAB7, member RAS oncogene family                             | 136 | 131 | 136 |
| 231724 | Rad9b   | RAD9 homolog B ( <i>S. cerevisiae</i> )                      | 92  | 94  | 92  |
| 80837  | Rhoj    | ras homolog gene family, member J                            | 303 | 308 | 303 |
| 57782  | Rbak    | RB-associated KRAB repressor                                 | 86  | 89  | 86  |
| 269400 | Rtel1   | regulator of telomere elongation helicase 1                  | 66  | 68  | 66  |
| 19702  | Ren2    | renin 2 tandem duplication of Ren1                           | 32  | 29  | 32  |
| 19889  | Rp2h    | retinitis pigmentosa 2 homolog (human)                       | 198 | 208 | 198 |
| 20181  | Rxra    | retinoid X receptor alpha                                    | 459 | 453 | 459 |
| 19683  | Rdh16   | retinol dehydrogenase 16                                     | 64  | 60  | 64  |
| 71336  | Rbks    | ribokinase                                                   | 111 | 107 | 111 |
| 54364  | Rpp30   | ribonuclease P/MRP 30 subunit (human)                        | 85  | 80  | 85  |

|        |               |                                                                               |     |     |     |
|--------|---------------|-------------------------------------------------------------------------------|-----|-----|-----|
| 68028  | Rpl22l1       | ribosomal protein L22 like 1                                                  | 139 | 133 | 139 |
| 19988  | Rpl6          | ribosomal protein L6                                                          | 259 | 244 | 259 |
| 20054  | Rps15         | ribosomal protein S15                                                         | 45  | 42  | 45  |
| 66481  | Rps21         | ribosomal protein S21                                                         | 41  | 43  | 41  |
| 20112  | Rps6ka2       | ribosomal protein S6 kinase, polypeptide 2                                    | 388 | 382 | 388 |
| 238323 | Rps6kl1       | ribosomal protein S6 kinase-like 1                                            | 83  | 88  | 83  |
| 76927  | 1700021C14Rik | RIKEN cDNA 1700021C14 gene                                                    | 60  | 53  | 60  |
| 381406 | 2810408M09Rik | RIKEN cDNA 2810408M09 gene                                                    | 38  | 40  | 38  |
| 321000 | 4933421E11Rik | RIKEN cDNA 4933421E11 gene                                                    | 344 | 367 | 344 |
| 19656  | Rbmxrt        | RNA binding motif protein, X chromosome retrogene                             | 94  | 92  | 94  |
| 76246  | Rtf1          | Rtf1, Paf1/RNA polymerase II complex component, homolog                       | 104 | 101 | 104 |
| 56505  | Ruvbl1        | RuvB-like protein 1                                                           | 95  | 92  | 95  |
| 20193  | S100a1        | S100 calcium binding protein A1                                               | 6   | 8   | 6   |
| 78891  | Scyl1         | SCY1-like 1 ( <i>S. cerevisiae</i> )                                          | 77  | 80  | 77  |
| 211006 | Sepsecs       | Sep (O-phosphoserine) tRNA:Sec (selenocysteine) tRNA sy                       | 218 | 223 | 218 |
| 54402  | Stk19         | serine/threonine kinase 19                                                    | 18  | 14  | 18  |
| 53416  | Stk39         | serine/threonine kinase 39, STE20/SPS1 homolog (yeast)                        | 603 | 589 | 603 |
| 58231  | Stk4          | serine/threonine kinase 4                                                     | 127 | 131 | 127 |
| 58172  | Sertad2       | SERTA domain containing 2                                                     | 493 | 501 | 493 |
| 29871  | Scmh1         | sex comb on midleg homolog 1                                                  | 315 | 321 | 315 |
| 50721  | Sirt6         | sirtuin 6 (silent mating type information regulation 2, homolog)              | 28  | 25  | 28  |
| 76793  | Snip1         | Smad nuclear interacting protein 1                                            | 23  | 26  | 23  |
| 66618  | Snrnp27       | small nuclear ribonucleoprotein 27 (U4/U6.U5)                                 | 88  | 86  | 88  |
| 50817  | Solh          | small optic lobes homolog ( <i>Drosophila</i> )                               | 92  | 88  | 92  |
| 26459  | Slc27a5       | solute carrier family 27 (fatty acid transporter), member 5                   | 44  | 42  | 44  |
| 56381  | Spen          | SPEN homolog, transcriptional regulator ( <i>Drosophila</i> )                 | 129 | 126 | 129 |
| 20690  | Spam1         | sperm adhesion molecule 1                                                     | 142 | 139 | 142 |
| 20598  | Smpd2         | sphingomyelin phosphodiesterase 2, neutral                                    | 17  | 14  | 17  |
| 101943 | Sf3b3         | splicing factor 3b, subunit 3                                                 | 12  | 10  | 12  |
| 71514  | Sfpq          | splicing factor proline/glutamine rich (polypyrimidine tract binding protein) | 122 | 119 | 122 |
| 77799  | Sla2          | Src-like-adaptor 2                                                            | 168 | 160 | 168 |
| 20667  | Sox12         | SRY-box containing gene 12                                                    | 45  | 42  | 45  |
| 59045  | Stard3        | START domain containing 3                                                     | 43  | 41  | 43  |
| 57357  | Srd5a3        | steroid 5 alpha-reductase 3                                                   | 174 | 183 | 174 |
| 20788  | Srebf2        | sterol regulatory element binding factor 2                                    | 91  | 93  | 91  |
| 66234  | Sc4mol        | sterol-C4-methyl oxidase-like                                                 | 228 | 231 | 228 |
| 67241  | Smc6          | structural maintenance of chromosomes 6                                       | 212 | 225 | 212 |
| 56362  | Sult1b1       | sulfotransferase family 1B, member 1                                          | 97  | 94  | 97  |
| 80886  | Senp3         | SUMO/sentrin specific peptidase 3                                             | 16  | 12  | 16  |
| 108077 | Skiv2l        | superkiller viralicidic activity 2-like ( <i>S. cerevisiae</i> )              | 17  | 15  | 17  |
| 72195  | Supt7l        | suppressor of Ty 7 ( <i>S. cerevisiae</i> )-like                              | 42  | 46  | 42  |
| 52615  | Suz12         | suppressor of zeste 12 homolog ( <i>Drosophila</i> )                          | 158 | 165 | 158 |
| 77647  | Trat1         | T cell receptor associated transmembrane adaptor 1                            | 490 | 486 | 490 |
| 228980 | Taf4a         | TAF4A RNA polymerase II, TATA box binding protein (TBP)                       | 693 | 672 | 693 |
| 69714  | Tfpt          | TCF3 (E2A) fusion partner                                                     | 16  | 12  | 16  |
| 73542  | Tssk5         | testis-specific serine kinase 5                                               | 15  | 11  | 15  |
| 22116  | Tsks          | testis-specific serine kinase substrate                                       | 60  | 49  | 60  |
| 66073  | Txndc12       | thioredoxin domain containing 12 (endoplasmic reticulum)                      | 19  | 22  | 19  |
| 52700  | Txndc17       | thioredoxin domain containing 17                                              | 11  | 16  | 11  |
| 50493  | Txnrd1        | thioredoxin reductase 1                                                       | 107 | 102 | 107 |
| 71807  | Tars2         | threonyl-tRNA synthetase 2, mitochondrial (putative)                          | 105 | 109 | 105 |
| 21828  | Thbs4         | thrombospondin 4                                                              | 299 | 304 | 299 |

|        |          |                                                                |     |     |     |
|--------|----------|----------------------------------------------------------------|-----|-----|-----|
| 22034  | Traf6    | TNF receptor-associated factor 6                               | 197 | 194 | 197 |
| 21975  | Top3a    | topoisomerase (DNA) III alpha                                  | 70  | 66  | 70  |
| 106529 | Tecr     | trans-2,3-enoyl-CoA reductase                                  | 54  | 50  | 54  |
| 21423  | Tcf3     | transcription factor 3                                         | 109 | 107 | 109 |
| 213773 | Tbl3     | transducin (beta)-like 3                                       | 29  | 31  | 29  |
| 17246  | Mdm2     | transformed mouse 3T3 cell double minute 2                     | 150 | 159 | 150 |
| 66525  | Timm50   | translocase of inner mitochondrial membrane 50 homolog (y      | 50  | 45  | 50  |
| 74140  | Tm9sf1   | transmembrane 9 superfamily member 1                           | 16  | 18  | 16  |
| 140765 | Tmprss3  | transmembrane protease, serine 3                               | 58  | 61  | 58  |
| 21991  | Tpi1     | triosephosphate isomerase 1                                    | 24  | 28  | 24  |
| 74691  | Tdrd9    | tudor domain containing 9                                      | 19  | 21  | 19  |
| 326623 | Tnfsf15  | tumor necrosis factor (ligand) superfamily, member 15          | 310 | 317 | 310 |
| 230979 | Tnfrsf14 | tumor necrosis factor receptor superfamily, member 14 (herp    | 81  | 83  | 81  |
| 22160  | Twist1   | twist homolog 1 (Drosophila)                                   | 753 | 765 | 753 |
| 22629  | Ywhah    | tyrosine 3-monooxygenase/tryptophan 5-monooxygenase a          | 317 | 310 | 317 |
| 107271 | Yars     | tyrosyl-tRNA synthetase                                        | 78  | 73  | 78  |
| 66152  | Uqcr10   | ubiquinol-cytochrome c reductase, complex III subunit X        | 91  | 88  | 91  |
| 93841  | Uchl4    | ubiquitin carboxyl-terminal esterase L4                        | 92  | 99  | 92  |
| 22192  | Ube2m    | ubiquitin-conjugating enzyme E2M (UBC12 homolog, yeast)        | 22  | 17  | 22  |
| 22238  | Ugt2b5   | UDP glucuronosyltransferase 2 family, polypeptide B5           | 209 | 213 | 209 |
| 67205  | Utp11    | UTP11-like, U3 small nucleolar ribonucleoprotein, (yeast)      | 59  | 57  | 59  |
| 65961  | Utp3     | UTP3, small subunit (SSU) processome component, homolo         | 63  | 67  | 63  |
| 28084  | Vps25    | vacuolar protein sorting 25 (yeast)                            | 17  | 22  | 17  |
| 270097 | Vat1l    | vesicle amine transport protein 1 homolog-like (T. californica | 362 | 360 | 362 |
| 22337  | Vdr      | vitamin D receptor                                             | 143 | 154 | 143 |
| 77305  | Wdr82    | WD repeat domain containing 82                                 | 24  | 26  | 24  |
| 22409  | Wnt10a   | wingless related MMTV integration site 10a                     | 95  | 90  | 95  |
| 216795 | Wnt9a    | wingless-type MMTV integration site 9A                         | 105 | 91  | 105 |
| 73680  | Zbtb8a   | zinc finger and BTB domain containing 8a                       | 139 | 136 | 139 |
| 269800 | Zfp384   | zinc finger protein 384                                        | 56  | 51  | 56  |
| 100515 | Zfp518b  | zinc finger protein 518B                                       | 410 | 388 | 410 |
| 319601 | Zfp653   | zinc finger protein 653                                        | 45  | 40  | 45  |
| 319748 | Zfp865   | zinc finger protein 865                                        | 27  | 25  | 27  |
| 99334  | Zscan29  | zinc finger SCAN domains 29                                    | 34  | 39  | 34  |
| 67235  | Zkscan14 | zinc finger with KRAB and SCAN domains 14                      | 16  | 19  | 16  |
| 1E+08  | Zkscan16 | zinc finger with KRAB and SCAN domains 16                      | 96  | 104 | 96  |
| 22757  | Zkscan5  | zinc finger with KRAB and SCAN domains 5                       | 41  | 38  | 41  |
