# Supplementary material
Source: PubMed Central journal article supplement (PMC4439875)
Supplement: bph0172-2782-sd8.pdf [file bph0172-2782-sd8.pdf]

**SUPPLEMENTARY TABLE 4. MitoCarta genes.**

The total number of nucleosomes within each gene identified as a mitochondrial associated gene by MitoCarta are listed for each treatment group by EntrezID, gene symbol and gene description.

| EntrezID | Gene Symbol | Gene Description                                                                              | Nucleosome Number |      |        |
|----------|-------------|-----------------------------------------------------------------------------------------------|-------------------|------|--------|
|          |             |                                                                                               | LF                | HF   | HF+NaB |
| 11363    | Acadl       | acyl-Coenzyme A dehydrogenase, long-chain                                                     | 150               | 145  | 147    |
| 11364    | Acadm       | acyl-Coenzyme A dehydrogenase, medium chain                                                   | 79                | 76   | 84     |
| 11370    | Acadvl      | acyl-Coenzyme A dehydrogenase, very long chain                                                | 0                 | 0    | 0      |
| 11409    | Acads       | acyl-Coenzyme A dehydrogenase, short chain                                                    | 157               | 164  | 166    |
| 11428    | Aco1        | aconitase 1                                                                                   | 1006              | 1009 | 1015   |
| 11429    | Aco2        | aconitase 2, mitochondrial                                                                    | 68                | 68   | 68     |
| 11564    | Adsl        | adenylosuccinate lyase 1                                                                      | 240               | 229  | 230    |
| 11611    | Agxt        | alanine-glyoxylate aminotransferase                                                           | 74                | 76   | 74     |
| 11637    | Ak2         | adenylate kinase 2                                                                            | 121               | 120  | 126    |
| 11639    | Ak3l1       | adenylate kinase 3 alpha-like 1                                                               | 0                 | 0    | 0      |
| 11640    | Akap1       | A kinase (PRKA) anchor protein 1                                                              | 318               | 318  | 335    |
| 11655    | Alas1       | aminolevulinic acid synthase 1                                                                | 77                | 76   | 76     |
| 11656    | Alas2       | aminolevulinic acid synthase 2, erythroid                                                     | 0                 | 0    | 0      |
| 11666    | Abcd1       | ATP-binding cassette, sub-family D (ALD), member 1                                            | 0                 | 0    | 0      |
| 11669    | Aldh2       | aldehyde dehydrogenase 2, mitochondrial                                                       | 94                | 87   | 100    |
| 11671    | Aldh3a2     | aldehyde dehydrogenase family 3, subfamily A2                                                 | 173               | 176  | 172    |
| 11692    | Gfer        | growth factor, erv1 ( <i>S. cerevisiae</i> )-like (augmenter of liver regeneration)           | 6                 | 8    | 6      |
| 11739    | Slc25a4     | solute carrier family 25 (mitochondrial carrier, adenine nucleotide translocator), member 4   | 154               | 153  | 157    |
| 11740    | Slc25a5     | solute carrier family 25 (mitochondrial carrier, adenine nucleotide translocator), member 5   | 0                 | 0    | 0      |
| 11757    | Prdx3       | peroxiredoxin 3                                                                               | 39                | 39   | 40     |
| 11758    | Prdx6       | peroxiredoxin 6                                                                               | 307               | 299  | 311    |
| 11847    | Arg2        | arginase type II                                                                              | 108               | 109  | 109    |
| 11848    | Rhoa        | ras homolog gene family, member A                                                             | 42                | 42   | 42     |
| 11946    | Atp5a1      | ATP synthase, H <sup>+</sup> transporting, mitochondrial F1 complex, alpha subunit, isoform 1 | 36                | 35   | 37     |

|       |        |                                                                                           |      |      |      |
|-------|--------|-------------------------------------------------------------------------------------------|------|------|------|
| 11947 | Atp5b  | ATP synthase, H+ transporting mitochondrial F1 complex, beta subunit                      | 0    | 0    | 0    |
| 11949 | Atp5c1 | ATP synthase, H+ transporting, mitochondrial F1 complex, gamma polypeptide 1              | 42   | 45   | 38   |
| 11950 | Atp5f1 | ATP synthase, H+ transporting, mitochondrial F0 complex, subunit b, isoform 1             | 18   | 16   | 20   |
| 11951 | Atp5g1 | ATP synthase, H+ transporting, mitochondrial F0 complex, subunit c (subunit 9), isoform 1 | 59   | 65   | 63   |
| 11957 | Atp5j  | ATP synthase, H+ transporting, mitochondrial F0 complex, subunit F                        | 433  | 440  | 425  |
| 11958 | Atp5k  | ATP synthase, H+ transporting, mitochondrial F1F0 complex, subunit e                      | 0    | 0    | 0    |
| 11983 | Atpif1 | ATPase inhibitory factor 1                                                                | 30   | 36   | 30   |
| 11992 | Auh    | AU RNA binding protein/enoyl-coenzyme A hydratase                                         | 293  | 289  | 289  |
| 11997 | Akr1b7 | aldo-keto reductase family 1, member B7                                                   | 0    | 0    | 0    |
| 12015 | Bad    | Bcl-associated death promoter                                                             | 0    | 0    | 0    |
| 12018 | Bak1   | BCL2-antagonist/killer 1                                                                  | 71   | 75   | 66   |
| 12028 | Bax    | Bcl2-associated X protein                                                                 | 34   | 32   | 34   |
| 12034 | Phb2   | prohibitin 2                                                                              | 6    | 5    | 7    |
| 12035 | Bcat1  | branched chain aminotransferase 1, cytosolic                                              | 1218 | 1212 | 1220 |
| 12036 | Bcat2  | branched chain aminotransferase 2, mitochondrial                                          | 76   | 72   | 73   |
| 12039 | Bckdha | branched chain ketoacid dehydrogenase E1, alpha polypeptide                               | 43   | 43   | 42   |
| 12040 | Bckdhb | branched chain ketoacid dehydrogenase E1, beta polypeptide                                | 1898 | 1893 | 1899 |
| 12041 | Bckdk  | branched chain ketoacid dehydrogenase kinase                                              | 21   | 24   | 22   |
| 12043 | Bcl2   | B-cell leukemia/lymphoma 2                                                                | 764  | 768  | 753  |
| 12122 | Bid    | BH3 interacting domain death agonist                                                      | 322  | 318  | 310  |
| 12257 | Tspo   | translocator protein                                                                      | 55   | 48   | 47   |
| 12261 | C1qbp  | complement component 1, q subcomponent binding protein                                    | 44   | 51   | 46   |
| 12352 | Car5a  | carbonic anhydrase 5a, mitochondrial                                                      | 0    | 0    | 0    |
| 12370 | Casp8  | caspase 8                                                                                 | 340  | 363  | 337  |
| 12409 | Cbr2   | carbonyl reductase 2                                                                      | 0    | 0    | 0    |
| 12468 | Cct7   | chaperonin subunit 7 (eta)                                                                | 0    | 0    | 1    |
| 12647 | Chat   | choline acetyltransferase                                                                 | 68   | 66   | 68   |

|       |         |                                                                     |     |     |     |
|-------|---------|---------------------------------------------------------------------|-----|-----|-----|
| 12716 | Ckmt1   | creatine kinase, mitochondrial 1, ubiquitous                        | 0   | 0   | 0   |
| 12846 | Comt    | catechol-O-methyltransferase                                        | 184 | 191 | 190 |
| 12850 | Coq7    | demethyl-Q 7                                                        | 123 | 124 | 125 |
| 12856 | Cox17   | cytochrome c oxidase, subunit XVII assembly protein homolog (yeast) | 25  | 25  | 27  |
| 12857 | Cox4i1  | cytochrome c oxidase subunit IV isoform 1                           | 82  | 88  | 87  |
| 12858 | Cox5a   | cytochrome c oxidase, subunit Va                                    | 41  | 38  | 40  |
| 12859 | Cox5b   | cytochrome c oxidase, subunit Vb                                    | 35  | 31  | 33  |
| 12861 | Cox6a1  | cytochrome c oxidase, subunit VI a, polypeptide 1                   | 117 | 115 | 121 |
| 12862 | Cox6a2  | cytochrome c oxidase, subunit VI a, polypeptide 2                   | 0   | 0   | 0   |
| 12864 | Cox6c   | cytochrome c oxidase, subunit VIc                                   | 602 | 613 | 616 |
| 12865 | Cox7a1  | cytochrome c oxidase, subunit VIIa 1                                | 34  | 35  | 32  |
| 12866 | Cox7a2  | cytochrome c oxidase, subunit VIIa 2                                | 100 | 96  | 96  |
| 12867 | Cox7c   | cytochrome c oxidase, subunit VIIc                                  | 0   | 0   | 0   |
| 12868 | Cox8a   | cytochrome c oxidase, subunit VIIIA                                 | 44  | 48  | 46  |
| 12869 | Cox8b   | cytochrome c oxidase, subunit VIIIB                                 | 0   | 0   | 0   |
| 12892 | Cpox    | coproporphyrinogen oxidase                                          | 95  | 103 | 98  |
| 12894 | Cpt1a   | carnitine palmitoyltransferase 1a, liver                            | 134 | 138 | 131 |
| 12895 | Cpt1b   | carnitine palmitoyltransferase 1b, muscle                           | 28  | 25  | 24  |
| 12896 | Cpt2    | carnitine palmitoyltransferase 2                                    | 103 | 101 | 104 |
| 12908 | Crat    | carnitine acetyltransferase                                         | 27  | 33  | 30  |
| 12952 | Cry1    | cryptochrome 1 (photolyase-like)                                    | 247 | 241 | 236 |
| 12974 | Cs      | citrate synthase                                                    | 65  | 59  | 64  |
| 13063 | Cycs    | cytochrome c, somatic                                               | 138 | 147 | 141 |
| 13067 | Cyct    | cytochrome c, testis                                                | 0   | 0   | 0   |
| 13070 | Cyp11a1 | cytochrome P450, family 11, subfamily a, polypeptide 1              | 214 | 201 | 210 |
| 13072 | Cyp11b2 | cytochrome P450, family 11, subfamily b, polypeptide 2              | 56  | 52  | 51  |
| 13081 | Cyp24a1 | cytochrome P450, family 24, subfamily a, polypeptide 1              | 19  | 19  | 17  |

|       |         |                                                                                 |      |      |      |
|-------|---------|---------------------------------------------------------------------------------|------|------|------|
| 13115 | Cyp27b1 | cytochrome P450, family 27, subfamily b, polypeptide 1                          | 25   | 22   | 22   |
| 13171 | Dbt     | dihydrolipoamide branched chain transacylase E2                                 | 73   | 73   | 77   |
| 13177 | Dci     | dodecenoyl-Coenzyme A delta isomerase (3,2 trans-enoyl-Coenzyme A isomerase)    | 0    | 0    | 0    |
| 13358 | Slc25a1 | solute carrier family 25 (mitochondrial carrier, citrate transporter), member 1 | 80   | 80   | 85   |
| 13382 | Dld     | dihydrolipoamide dehydrogenase                                                  | 222  | 233  | 212  |
| 13495 | Drg2    | developmentally regulated GTP binding protein 2                                 | 71   | 73   | 67   |
| 13717 | Eln     | elastin                                                                         | 279  | 281  | 274  |
| 13804 | Endog   | endonuclease G                                                                  | 57   | 54   | 56   |
| 14004 | Chchd2  | coiled-coil-helix-coiled-coil-helix domain containing 2                         | 22   | 19   | 19   |
| 14057 | Sfxn1   | sideroflexin 1                                                                  | 171  | 179  | 173  |
| 14081 | Acsl1   | acyl-CoA synthetase long-chain family member 1                                  | 329  | 332  | 336  |
| 14104 | Fasn    | fatty acid synthase                                                             | 174  | 167  | 170  |
| 14148 | Fdx1    | ferredoxin 1                                                                    | 226  | 225  | 217  |
| 14149 | Fdxr    | ferredoxin reductase                                                            | 34   | 37   | 36   |
| 14151 | Fech    | ferrochelatase                                                                  | 233  | 217  | 216  |
| 14194 | Fh1     | fumarate hydratase 1                                                            | 0    | 0    | 0    |
| 14232 | Fkbp8   | FK506 binding protein 8                                                         | 18   | 19   | 18   |
| 14287 | Fpgs    | folypolyglutamyl synthetase                                                     | 83   | 77   | 80   |
| 14297 | Fxn     | frataxin                                                                        | 334  | 338  | 330  |
| 14319 | Fth1    | ferritin heavy chain 1                                                          | 132  | 126  | 133  |
| 14356 | Fxc1    | fractured callus expressed transcript 1                                         | 127  | 117  | 125  |
| 14420 | Galc    | galactosylceramidase                                                            | 2829 | 2853 | 2827 |
| 14467 | Gbas    | glioblastoma amplified sequence                                                 | 96   | 98   | 99   |
| 14533 | Bloc1s1 | biogenesis of lysosome-related organelles complex-1, subunit 1                  | 15   | 17   | 21   |
| 14548 | Mrps33  | mitochondrial ribosomal protein S33                                             | 488  | 485  | 486  |
| 14555 | Gpd1    | glycerol-3-phosphate dehydrogenase 1 (soluble)                                  | 0    | 0    | 0    |
| 14571 | Gpd2    | glycerol phosphate dehydrogenase 2, mitochondrial                               | 1119 | 1138 | 1135 |

|       |          |                                                                              |      |      |      |
|-------|----------|------------------------------------------------------------------------------|------|------|------|
| 14625 | Gyk1     | glycerol kinase-like 1                                                       | 0    | 0    | 0    |
| 14626 | Gk2      | glycerol kinase 2                                                            | 807  | 795  | 807  |
| 14651 | Hagh     | hydroxyacyl glutathione hydrolase                                            | 39   | 37   | 34   |
| 14660 | Gls      | glutaminase                                                                  | 481  | 485  | 475  |
| 14661 | Glud1    | glutamate dehydrogenase 1                                                    | 47   | 45   | 45   |
| 14707 | Gng5     | guanine nucleotide binding protein (G protein), gamma 5 subunit              | 27   | 25   | 29   |
| 14719 | Got2     | glutamate oxaloacetate transaminase 2, mitochondrial                         | 146  | 146  | 132  |
| 14732 | Gpam     | glycerol-3-phosphate acyltransferase, mitochondrial                          | 1449 | 1415 | 1432 |
| 14775 | Gpx1     | glutathione peroxidase 1                                                     | 50   | 58   | 55   |
| 14782 | Gsr      | glutathione reductase 1                                                      | 126  | 129  | 116  |
| 14933 | Gyk      | glycerol kinase                                                              | 0    | 0    | 0    |
| 14979 | H2-Ke6   | H2-K region expressed gene 6                                                 | 0    | 0    | 0    |
| 15107 | Hadh     | hydroxyacyl-Coenzyme A dehydrogenase                                         | 258  | 249  | 262  |
| 15108 | Hsd17b10 | hydroxysteroid (17-beta) dehydrogenase 10                                    | 0    | 0    | 0    |
| 15159 | Hccs     | holocytochrome c synthetase                                                  | 0    | 0    | 0    |
| 15275 | Hk1      | hexokinase 1                                                                 | 220  | 210  | 213  |
| 15277 | Hk2      | hexokinase 2                                                                 | 376  | 364  | 373  |
| 15278 | Tfb2m    | transcription factor B2, mitochondrial                                       | 42   | 36   | 41   |
| 15356 | Hmgcl    | 3-hydroxy-3-methylglutaryl-Coenzyme A lyase                                  | 58   | 58   | 61   |
| 15360 | Hmgcs2   | 3-hydroxy-3-methylglutaryl-Coenzyme A synthase 2                             | 157  | 158  | 144  |
| 15473 | Hrsp12   | heat-responsive protein 12                                                   | 55   | 55   | 53   |
| 15488 | Hsd17b4  | hydroxysteroid (17-beta) dehydrogenase 4                                     | 294  | 284  | 287  |
| 15492 | Hsd3b1   | hydroxy-delta-5-steroid dehydrogenase, 3 beta- and steroid delta-isomerase 1 | 103  | 106  | 105  |
| 15495 | Hsd3b4   | hydroxy-delta-5-steroid dehydrogenase, 3 beta- and steroid delta-isomerase 4 | 0    | 0    | 0    |
| 15496 | Hsd3b5   | hydroxy-delta-5-steroid dehydrogenase, 3 beta- and steroid delta-isomerase 5 | 0    | 0    | 0    |
| 15510 | Hspd1    | heat shock protein 1 (chaperonin)                                            | 45   | 43   | 45   |
| 15526 | Hspa9    | heat shock protein 9                                                         | 264  | 246  | 249  |

|              |                                                  |     |     |     |
|--------------|--------------------------------------------------|-----|-----|-----|
| 15528 Hspe1  | heat shock protein 1 (chaperonin 10)             | 57  | 53  | 51  |
| 15925 Ide    | insulin degrading enzyme                         | 217 | 213 | 223 |
| 15926 Idh1   | isocitrate dehydrogenase 1 (NADP+), soluble      | 92  | 94  | 94  |
| 15929 Idh3g  | isocitrate dehydrogenase 3 (NAD+), gamma         | 0   | 0   | 0   |
| 16561 Kif1b  | kinesin family member 1B                         | 338 | 338 | 331 |
| 16828 Ldha   | lactate dehydrogenase A                          | 84  | 83  | 86  |
| 16832 Ldhb   | lactate dehydrogenase B                          | 133 | 129 | 126 |
| 16922 Phyh   | phytanoyl-CoA hydroxylase                        | 124 | 121 | 127 |
| 17117 Amacr  | alpha-methylacyl-CoA racemase                    | 67  | 58  | 56  |
| 17161 Maa    | monoamine oxidase A                              | 0   | 0   | 0   |
| 17433 Mobp   | myelin-associated oligodendrocytic basic protein | 234 | 225 | 228 |
| 17436 Mod1   | malic enzyme, supernatant                        | 0   | 0   | 0   |
| 17448 Mdh2   | malate dehydrogenase 2, NAD (mitochondrial)      | 49  | 48  | 48  |
| 17449 Mdh1   | malate dehydrogenase 1, NAD (soluble)            | 84  | 80  | 73  |
| 17527 Mpv17  | Mpv17 transgene, kidney disease mutant           | 52  | 51  | 54  |
| 17705 ATP6   | ATP synthase F0 subunit 6                        | 0   | 0   | 0   |
| 17706 ATP8   | ATP synthase F0 subunit 8                        | 0   | 0   | 0   |
| 17708 COX1   | cytochrome c oxidase subunit I                   | 0   | 0   | 0   |
| 17709 COX2   | cytochrome c oxidase subunit II                  | 0   | 0   | 0   |
| 17710 COX3   | cytochrome c oxidase subunit III                 | 0   | 0   | 0   |
| 17711 CYTB   | cytochrome b                                     | 0   | 0   | 0   |
| 17713 Grpel1 | GrpE-like 1, mitochondrial                       | 117 | 102 | 112 |
| 17714 Grpel2 | GrpE-like 2, mitochondrial                       | 24  | 23  | 25  |
| 17716 ND1    | NADH dehydrogenase subunit 1                     | 0   | 0   | 0   |
| 17717 ND2    | NADH dehydrogenase subunit 2                     | 0   | 0   | 0   |
| 17718 ND3    | NADH dehydrogenase subunit 3                     | 0   | 0   | 0   |
| 17719 ND4    | NADH dehydrogenase subunit 4                     | 0   | 0   | 0   |

|                |                                                                                                      |      |      |      |
|----------------|------------------------------------------------------------------------------------------------------|------|------|------|
| 17720 ND4L     | NADH dehydrogenase subunit 4L                                                                        | 0    | 0    | 0    |
| 17721 ND5      | NADH dehydrogenase subunit 5                                                                         | 0    | 0    | 0    |
| 17722 ND6      | NADH dehydrogenase subunit 6                                                                         | 0    | 0    | 0    |
| 17763 Mtcp1    | mature T-cell proliferation 1                                                                        | 0    | 0    | 0    |
| 17768 Mthfd2   | methylenetetrahydrofolate dehydrogenase (NAD+ dependent),<br>methenyltetrahydrofolate cyclohydrolase | 118  | 121  | 118  |
| 17827 Mtx1     | metaxin 1                                                                                            | 13   | 14   | 12   |
| 17850 Mut      | methylmalonyl-Coenzyme A mutase                                                                      | 1744 | 1791 | 1721 |
| 17991 Ndufa2   | NADH dehydrogenase (ubiquinone) 1 alpha subcomplex, 2                                                | 12   | 10   | 11   |
| 17992 Ndufa4   | NADH dehydrogenase (ubiquinone) 1 alpha subcomplex, 4                                                | 1205 | 1219 | 1181 |
| 17993 Ndufs4   | NADH dehydrogenase (ubiquinone) Fe-S protein 4                                                       | 848  | 871  | 857  |
| 17995 Ndufv1   | NADH dehydrogenase (ubiquinone) flavoprotein 1                                                       | 41   | 43   | 42   |
| 18041 Nfs1     | nitrogen fixation gene 1 (S. cerevisiae)                                                             | 0    | 0    | 0    |
| 18082 Nipsnap1 | 4-nitrophenylphosphatase domain and non-neuronal SNAP25-like protein homolog 1<br>(C. elegans)       | 61   | 61   | 57   |
| 18100 Mrpl40   | mitochondrial ribosomal protein L40                                                                  | 49   | 52   | 51   |
| 18102 Nme1     | expressed in non-metastatic cells 1, protein                                                         | 52   | 51   | 51   |
| 18103 Nme2     | expressed in non-metastatic cells 2, protein                                                         | 108  | 109  | 105  |
| 18115 Nnt      | nicotinamide nucleotide transhydrogenase                                                             | 902  | 933  | 890  |
| 18120 Mrpl49   | mitochondrial ribosomal protein L49                                                                  | 13   | 12   | 12   |
| 18207 Nthl1    | nth (endonuclease III)-like 1 (E.coli)                                                               | 15   | 14   | 16   |
| 18242 Oat      | ornithine aminotransferase                                                                           | 371  | 364  | 369  |
| 18293 Ogdh     | oxoglutarate dehydrogenase (lipoamide)                                                               | 148  | 147  | 153  |
| 18294 Ogg1     | 8-oxoguanine DNA-glycosylase 1                                                                       | 47   | 39   | 45   |
| 18408 Slc25a15 | solute carrier family 25 (mitochondrial carrier ornithine transporter), member 15                    | 156  | 165  | 164  |
| 18416 Otc      | ornithine transcarbamylase                                                                           | 0    | 0    | 0    |
| 18477 Prdx1    | peroxiredoxin 1                                                                                      | 75   | 74   | 74   |
| 18563 Pcx      | pyruvate carboxylase                                                                                 | 0    | 0    | 0    |
| 18597 Pdha1    | pyruvate dehydrogenase E1 alpha 1                                                                    | 0    | 0    | 0    |

|       |         |                                                                               |      |      |      |
|-------|---------|-------------------------------------------------------------------------------|------|------|------|
| 18598 | Pdha2   | pyruvate dehydrogenase E1 alpha 2                                             | 2836 | 2863 | 2801 |
| 18604 | Pdk2    | pyruvate dehydrogenase kinase, isoenzyme 2                                    | 89   | 86   | 87   |
| 18632 | Pex11b  | peroxisomal biogenesis factor 11b                                             | 24   | 22   | 21   |
| 18669 | Abcb1b  | ATP-binding cassette, sub-family B (MDR/TAP), member 1B                       | 0    | 0    | 0    |
| 18673 | Phb     | prohibitin                                                                    | 180  | 166  | 187  |
| 18674 | Slc25a3 | solute carrier family 25 (mitochondrial carrier, phosphate carrier), member 3 | 115  | 116  | 115  |
| 18952 | 39329   | septin 4                                                                      | 0    | 0    | 0    |
| 18975 | Polg    | polymerase (DNA directed), gamma                                              | 146  | 142  | 146  |
| 19044 | Ppox    | protoporphyrinogen oxidase                                                    | 21   | 20   | 25   |
| 19125 | Prodh   | proline dehydrogenase                                                         | 91   | 96   | 91   |
| 19286 | Pts     | 6-pyruvoyl-tetrahydropterin synthase                                          | 75   | 82   | 77   |
| 19299 | Abcd3   | ATP-binding cassette, sub-family D (ALD), member 3                            | 295  | 289  | 294  |
| 19301 | Pxmp2   | peroxisomal membrane protein 2                                                | 0    | 0    | 0    |
| 19326 | Rab11b  | RAB11B, member RAS oncogene family                                            | 78   | 80   | 78   |
| 19336 | Rab24   | RAB24, member RAS oncogene family                                             | 148  | 153  | 155  |
| 19340 | Rab3d   | RAB3D, member RAS oncogene family                                             | 104  | 93   | 102  |
| 19342 | Rab4b   | RAB4B, member RAS oncogene family                                             | 5    | 5    | 5    |
| 19819 | Rnaseh1 | ribonuclease H1                                                               | 49   | 50   | 59   |
| 19896 | Rpl10a  | ribosomal protein L10A                                                        | 47   | 44   | 42   |
| 19935 | Mrp123  | mitochondrial ribosomal protein L23                                           | 71   | 70   | 65   |
| 20044 | Rps14   | ribosomal protein S14                                                         | 113  | 116  | 110  |
| 20216 | Acsm3   | acyl-CoA synthetase medium-chain family member 3                              | 91   | 93   | 93   |
| 20226 | Sars    | seryl-aminoacyl-tRNA synthetase                                               | 162  | 156  | 151  |
| 20280 | Scp2    | sterol carrier protein 2, liver                                               | 185  | 170  | 166  |
| 20425 | Shmt1   | serine hydroxymethyl transferase 1 (soluble)                                  | 67   | 67   | 70   |
| 20463 | Cox7a2l | cytochrome c oxidase subunit VIIa polypeptide 2-like                          | 371  | 372  | 370  |
| 20480 | Clpb    | ClpB caseinolytic peptidase B homolog (E. coli)                               | 294  | 314  | 303  |

|       |          |                                                                       |      |      |      |
|-------|----------|-----------------------------------------------------------------------|------|------|------|
| 20501 | Slc16a1  | solute carrier family 16 (monocarboxylic acid transporters), member 1 | 323  | 340  | 334  |
| 20523 | Slc25a14 | solute carrier family 25 (mitochondrial carrier, brain), member 14    | 0    | 0    | 0    |
| 20655 | Sod1     | superoxide dismutase 1, soluble                                       | 188  | 183  | 175  |
| 20656 | Sod2     | superoxide dismutase 2, mitochondrial                                 | 78   | 77   | 76   |
| 20751 | Spr      | sepiapterin reductase                                                 | 80   | 79   | 83   |
| 20773 | Sptlc2   | serine palmitoyltransferase, long chain base subunit 2                | 227  | 220  | 219  |
| 20845 | Star     | steroidogenic acute regulatory protein                                | 75   | 71   | 80   |
| 20916 | Sucla2   | succinate-Coenzyme A ligase, ADP-forming, beta subunit                | 1393 | 1392 | 1373 |
| 20917 | Suclg2   | succinate-Coenzyme A ligase, GDP-forming, beta subunit                | 1000 | 1004 | 984  |
| 20930 | Surf1    | surfeit gene 1                                                        | 23   | 20   | 24   |
| 21354 | Tap1     | transporter 1, ATP-binding cassette, sub-family B (MDR/TAP)           | 13   | 14   | 10   |
| 21379 | Tbrg4    | transforming growth factor beta regulated gene 4                      | 22   | 25   | 28   |
| 21672 | Prdx2    | peroxiredoxin 2                                                       | 0    | 0    | 0    |
| 21780 | Tfam     | transcription factor A, mitochondrial                                 | 134  | 138  | 131  |
| 21854 | Timm17a  | translocase of inner mitochondrial membrane 17a                       | 48   | 55   | 53   |
| 21855 | Timm17b  | translocase of inner mitochondrial membrane 17b                       | 0    | 0    | 0    |
| 21856 | Timm44   | translocase of inner mitochondrial membrane 44                        | 83   | 91   | 88   |
| 22117 | Tst      | thiosulfate sulfurtransferase, mitochondrial                          | 13   | 12   | 11   |
| 22166 | Txn1     | thioredoxin 1                                                         | 0    | 0    | 0    |
| 22227 | Ucp1     | uncoupling protein 1 (mitochondrial, proton carrier)                  | 216  | 205  | 217  |
| 22228 | Ucp2     | uncoupling protein 2 (mitochondrial, proton carrier)                  | 51   | 53   | 49   |
| 22229 | Ucp3     | uncoupling protein 3 (mitochondrial, proton carrier)                  | 158  | 156  | 160  |
| 22256 | Ung      | uracil DNA glycosylase                                                | 44   | 46   | 46   |
| 22272 | Uqcrcq   | ubiquinol-cytochrome c reductase, complex III subunit VII             | 11   | 12   | 9    |
| 22273 | Uqcrc1   | ubiquinol-cytochrome c reductase core protein 1                       | 50   | 52   | 49   |
| 22317 | Vamp1    | vesicle-associated membrane protein 1                                 | 48   | 53   | 56   |
| 22320 | Vamp8    | vesicle-associated membrane protein 8                                 | 44   | 43   | 48   |

|       |          |                                                                                        |      |      |      |
|-------|----------|----------------------------------------------------------------------------------------|------|------|------|
| 22333 | Vdac1    | voltage-dependent anion channel 1                                                      | 146  | 145  | 140  |
| 22334 | Vdac2    | voltage-dependent anion channel 2                                                      | 135  | 129  | 135  |
| 22335 | Vdac3    | voltage-dependent anion channel 3                                                      | 193  | 189  | 178  |
| 23795 | Agr2     | anterior gradient 2 ( <i>Xenopus laevis</i> )                                          | 152  | 153  | 145  |
| 23923 | Aadat    | aminoadipate aminotransferase                                                          | 2164 | 2156 | 2144 |
| 23986 | Peci     | peroxisomal delta3, delta2-enoyl-Coenzyme A isomerase                                  | 0    | 0    | 0    |
| 24030 | Mrps12   | mitochondrial ribosomal protein S12                                                    | 29   | 32   | 31   |
| 26462 | Txnrd2   | thioredoxin reductase 2                                                                | 16   | 15   | 18   |
| 26874 | Abcd2    | ATP-binding cassette, sub-family D (ALD), member 2                                     | 679  | 675  | 668  |
| 26897 | Acot1    | acyl-CoA thioesterase 1                                                                | 0    | 0    | 0    |
| 26912 | Gcat     | glycine C-acetyltransferase (2-amino-3-ketobutyrate-coenzyme A ligase)                 | 16   | 15   | 16   |
| 26922 | Mecr     | mitochondrial trans-2-enoyl-CoA reductase                                              | 36   | 43   | 45   |
| 26926 | Aifm1    | apoptosis-inducing factor, mitochondrion-associated 1                                  | 0    | 0    | 0    |
| 26940 | Ecsit    | ECSIT homolog ( <i>Drosophila</i> )                                                    | 41   | 35   | 38   |
| 27045 | Nit1     | nitrilase 1                                                                            | 19   | 19   | 20   |
| 27057 | Ncoa4    | nuclear receptor coactivator 4                                                         | 85   | 89   | 82   |
| 27060 | Tcirg1   | T-cell, immune regulator 1, ATPase, H+ transporting, lysosomal V0 protein A3           | 82   | 78   | 80   |
| 27273 | Pdk4     | pyruvate dehydrogenase kinase, isoenzyme 4                                             | 429  | 432  | 426  |
| 27369 | Dguok    | deoxyguanosine kinase                                                                  | 118  | 127  | 121  |
| 27376 | Slc25a10 | solute carrier family 25 (mitochondrial carrier, dicarboxylate transporter), member 10 | 64   | 59   | 57   |
| 27377 | Yme111   | YME1-like 1 ( <i>S. cerevisiae</i> )                                                   | 71   | 68   | 65   |
| 27393 | Mrpl39   | mitochondrial ribosomal protein L39                                                    | 79   | 80   | 77   |
| 27395 | Mrpl15   | mitochondrial ribosomal protein L15                                                    | 403  | 408  | 397  |
| 27397 | Mrpl17   | mitochondrial ribosomal protein L17                                                    | 102  | 86   | 97   |
| 27398 | Mrpl2    | mitochondrial ribosomal protein L2                                                     | 7    | 7    | 4    |
| 27402 | Pdhx     | pyruvate dehydrogenase complex, component X                                            | 230  | 221  | 231  |
| 27407 | Abcf2    | ATP-binding cassette, sub-family F (GCN20), member 2                                   | 39   | 37   | 42   |

|       |           |                                                                                                 |      |      |      |
|-------|-----------|-------------------------------------------------------------------------------------------------|------|------|------|
| 27425 | Atp5l     | ATP synthase, H+ transporting, mitochondrial F0 complex, subunit g                              | 119  | 113  | 110  |
| 28028 | Mrpl50    | mitochondrial ribosomal protein L50                                                             | 18   | 19   | 17   |
| 28030 | Gfm1      | G elongation factor, mitochondrial 1                                                            | 113  | 109  | 113  |
| 28080 | Atp5o     | ATP synthase, H+ transporting, mitochondrial F1 complex, O subunit                              | 420  | 422  | 420  |
| 28185 | Tomm70a   | translocase of outer mitochondrial membrane 70 homolog A (yeast)                                | 135  | 126  | 123  |
| 28200 | Dhrs4     | dehydrogenase/reductase (SDR family) member 4                                                   | 364  | 343  | 335  |
| 28295 | D10Jhu81e | DNA segment, Chr 10, Johns Hopkins University 81 expressed                                      | 0    | 0    | 0    |
| 29818 | Hspb7     | heat shock protein family, member 7 (cardiovascular)                                            | 23   | 21   | 22   |
| 29876 | Clic4     | chloride intracellular channel 4 (mitochondrial)                                                | 293  | 296  | 296  |
| 30055 | Timm13    | translocase of inner mitochondrial membrane 13 homolog (yeast)                                  | 0    | 0    | 0    |
| 30056 | Timm9     | translocase of inner mitochondrial membrane 9 homolog (yeast)                                   | 30   | 33   | 36   |
| 30057 | Timm8b    | translocase of inner mitochondrial membrane 8 homolog b (yeast)                                 | 17   | 20   | 18   |
| 30058 | Timm8a1   | translocase of inner mitochondrial membrane 8 homolog a1 (yeast)                                | 0    | 0    | 0    |
| 30059 | Timm10    | translocase of inner mitochondrial membrane 10 homolog (yeast)                                  | 22   | 23   | 24   |
| 30805 | Slc22a4   | solute carrier family 22 (organic cation transporter), member 4                                 | 114  | 112  | 116  |
| 30956 | Aass      | aminoadipate-semialdehyde synthase                                                              | 460  | 479  | 474  |
| 50493 | Txnrd1    | thioredoxin reductase 1                                                                         | 107  | 102  | 107  |
| 50529 | Mrps7     | mitochondrial ribosomal protein S7                                                              | 12   | 9    | 10   |
| 50773 | Nt5c      | 5',3'-nucleotidase, cytosolic                                                                   | 53   | 45   | 55   |
| 50776 | Polg2     | polymerase (DNA directed), gamma 2, accessory subunit                                           | 37   | 40   | 40   |
| 50790 | Acsl4     | acyl-CoA synthetase long-chain family member 4                                                  | 0    | 0    | 0    |
| 50799 | Slc25a13  | solute carrier family 25 (mitochondrial carrier, adenine nucleotide translocator), member 13    | 1108 | 1125 | 1107 |
| 51798 | Ech1      | enoyl coenzyme A hydratase 1, peroxisomal                                                       | 34   | 28   | 31   |
| 52055 | Rab11fip5 | RAB11 family interacting protein 5 (class I)                                                    | 120  | 111  | 120  |
| 52064 | Coq5      | coenzyme Q5 homolog, methyltransferase (yeast)                                                  | 37   | 34   | 40   |
| 52123 | Agpat5    | 1-acylglycerol-3-phosphate O-acyltransferase 5 (lysophosphatidic acid acyltransferase, epsilon) | 271  | 266  | 278  |
| 52443 | Mrpl48    | mitochondrial ribosomal protein L48                                                             | 151  | 158  | 156  |

|       |               |                                                                                   |      |      |      |
|-------|---------------|-----------------------------------------------------------------------------------|------|------|------|
| 52535 | Mett11d1      | methyltransferase 11 domain containing 1                                          | 0    | 0    | 0    |
| 52538 | Acaa2         | acetyl-Coenzyme A acyltransferase 2 (mitochondrial 3-oxoacyl-Coenzyme A thiolase) | 228  | 226  | 235  |
| 52575 | Rg9mtd1       | RNA (guanine-9-) methyltransferase domain containing 1                            | 59   | 61   | 58   |
| 52585 | Dhrs1         | dehydrogenase/reductase (SDR family) member 1                                     | 32   | 33   | 30   |
| 52637 | Zcd1          | zinc finger, CDGSH-type domain 1                                                  | 0    | 0    | 0    |
| 52815 | Ldhd          | lactate dehydrogenase D                                                           | 127  | 137  | 144  |
| 52838 | D2Bwg1335e    | DNA segment, Chr 2, Brigham & Women's Genetics 1335 expressed                     | 0    | 0    | 0    |
| 52856 | Gtpbp5        | GTP binding protein 5                                                             | 75   | 74   | 81   |
| 52892 | Sco1          | SCO cytochrome oxidase deficient homolog 1 (yeast)                                | 34   | 30   | 31   |
| 53333 | Tomm40        | translocase of outer mitochondrial membrane 40 homolog (yeast)                    | 62   | 65   | 62   |
| 53375 | Mtx2          | metaxin 2                                                                         | 1167 | 1155 | 1142 |
| 53600 | Timm23        | translocase of inner mitochondrial membrane 23 homolog (yeast)                    | 0    | 0    | 0    |
| 53869 | Rab11a        | RAB11a, member RAS oncogene family                                                | 552  | 547  | 544  |
| 53895 | Clpp          | caseinolytic peptidase, ATP-dependent, proteolytic subunit homolog (E. coli)      | 19   | 18   | 20   |
| 54369 | Nme6          | expressed in non-metastatic cells 6, protein                                      | 26   | 21   | 24   |
| 54391 | Rfk           | riboflavin kinase                                                                 | 599  | 612  | 598  |
| 54405 | Ndufa1        | NADH dehydrogenase (ubiquinone) 1 alpha subcomplex, 1                             | 0    | 0    | 0    |
| 54447 | Asah2         | N-acylsphingosine amidohydrolase 2                                                | 429  | 434  | 440  |
| 54683 | Prdx5         | peroxiredoxin 5                                                                   | 68   | 65   | 63   |
| 55936 | Ctps2         | cytidine 5'-triphosphate synthase 2                                               | 0    | 0    | 0    |
| 55951 | Brp44l        | brain protein 44-like                                                             | 81   | 89   | 92   |
| 56046 | 2410003P15Rik | RIKEN cDNA 2410003P15 gene                                                        | 0    | 0    | 0    |
| 56075 | Pdss1         | prenyl (solanesyl) diphosphate synthase, subunit 1                                | 338  | 348  | 331  |
| 56078 | Car5b         | carbonic anhydrase 5b, mitochondrial                                              | 0    | 0    | 0    |
| 56185 | Hao3          | hydroxyacid oxidase (glycolate oxidase) 3                                         | 0    | 0    | 0    |
| 56189 | Prodh2        | proline dehydrogenase (oxidase) 2                                                 | 66   | 67   | 69   |
| 56199 | Abcb10        | ATP-binding cassette, sub-family B (MDR/TAP), member 10                           | 91   | 90   | 94   |

|                     |                                                                                         |     |     |     |
|---------------------|-----------------------------------------------------------------------------------------|-----|-----|-----|
| 56248 Ak3           | adenylate kinase 3                                                                      | 66  | 67  | 69  |
| 56280 Mrpl37        | mitochondrial ribosomal protein L37                                                     | 209 | 203 | 199 |
| 56282 Mrpl12        | mitochondrial ribosomal protein L12                                                     | 28  | 34  | 32  |
| 56284 Mrpl19        | mitochondrial ribosomal protein L19                                                     | 154 | 145 | 159 |
| 56295 Higd1a        | HIG1 domain family, member 1A                                                           | 54  | 51  | 48  |
| 56322 Timm22        | translocase of inner mitochondrial membrane 22 homolog (yeast)                          | 139 | 138 | 143 |
| 56357 Ivd           | isovaleryl coenzyme A dehydrogenase                                                     | 121 | 114 | 123 |
| 56360 Acot9         | acyl-CoA thioesterase 9                                                                 | 0   | 0   | 0   |
| 56384 Letm1         | leucine zipper-EF-hand containing transmembrane protein 1                               | 152 | 152 | 157 |
| 56412 2610024G14Rik | RIKEN cDNA 2610024G14 gene                                                              | 0   | 0   | 0   |
| 56428 Mtch2         | mitochondrial carrier homolog 2 (C. elegans)                                            | 137 | 135 | 143 |
| 56451 Suclg1        | succinate-CoA ligase, GDP-forming, alpha subunit                                        | 311 | 318 | 312 |
| 56454 Aldh18a1      | aldehyde dehydrogenase 18 family, member A1                                             | 127 | 126 | 126 |
| 56462 Mtch1         | mitochondrial carrier homolog 1 (C. elegans)                                            | 53  | 58  | 55  |
| 56463 AL033314      | expressed sequence AL033314                                                             | 0   | 0   | 0   |
| 56520 Nme4          | expressed in non-metastatic cells 4, protein                                            | 30  | 27  | 28  |
| 56551 Txn2          | thioredoxin 2                                                                           | 148 | 153 | 147 |
| 56690 Mlycd         | malonyl-CoA decarboxylase                                                               | 115 | 117 | 119 |
| 56695 Pnkd          | paroxysmal nonkinesigenic dyskinesia                                                    | 105 | 102 | 90  |
| 56697 Akap10        | A kinase (PRKA) anchor protein 10                                                       | 282 | 296 | 293 |
| 56748 Nfu1          | NFU1 iron-sulfur cluster scaffold homolog (S. cerevisiae)                               | 254 | 253 | 254 |
| 56749 Dhodh         | dihydroorotate dehydrogenase                                                            | 44  | 47  | 46  |
| 56752 Aldh9a1       | aldehyde dehydrogenase 9, subfamily A1                                                  | 111 | 113 | 116 |
| 57279 Slc25a20      | solute carrier family 25 (mitochondrial carnitine/acylcarnitine translocase), member 20 | 55  | 61  | 60  |
| 57312 Mrps31        | mitochondrial ribosomal protein S31                                                     | 102 | 106 | 103 |
| 57320 Park7         | Parkinson disease (autosomal recessive, early onset) 7                                  | 78  | 79  | 80  |
| 57344 As3mt         | arsenic (+3 oxidation state) methyltransferase                                          | 91  | 94  | 91  |

|       |         |                                                                                             |      |      |      |
|-------|---------|---------------------------------------------------------------------------------------------|------|------|------|
| 57423 | Atp5j2  | ATP synthase, H <sup>+</sup> transporting, mitochondrial F0 complex, subunit f, isoform 2   | 45   | 42   | 42   |
| 57431 | Dnajc4  | DnaJ (Hsp40) homolog, subfamily C, member 4                                                 | 11   | 10   | 10   |
| 57808 | Rpl35a  | ribosomal protein L35a                                                                      | 9    | 9    | 9    |
| 57813 | Tk2     | thymidine kinase 2, mitochondrial                                                           | 104  | 102  | 100  |
| 57869 | Adck2   | aarF domain containing kinase 2                                                             | 49   | 41   | 47   |
| 58865 | Tdh     | L-threonine dehydrogenase                                                                   | 0    | 0    | 0    |
| 58875 | Hibadh  | 3-hydroxyisobutyrate dehydrogenase                                                          | 509  | 517  | 492  |
| 59010 | Sqrdl   | sulfide quinone reductase-like (yeast)                                                      | 2406 | 2417 | 2393 |
| 59040 | Rhot1   | ras homolog gene family, member T1                                                          | 160  | 156  | 145  |
| 59054 | Mrps30  | mitochondrial ribosomal protein S30                                                         | 1392 | 1422 | 1399 |
| 59310 | Mylc2pl | myosin light chain 2, precursor lymphocyte-specific                                         | 0    | 0    | 0    |
| 60441 | Mrpl38  | mitochondrial ribosomal protein L38                                                         | 0    | 0    | 0    |
| 64059 | Oxct2a  | 3-oxoacid CoA transferase 2A                                                                | 0    | 0    | 0    |
| 64384 | Sirt3   | sirtuin 3 (silent mating type information regulation 2, homolog) 3 ( <i>S. cerevisiae</i> ) | 34   | 33   | 32   |
| 64602 | Ireb2   | iron responsive element binding protein 2                                                   | 199  | 203  | 204  |
| 64655 | Mrps22  | mitochondrial ribosomal protein S22                                                         | 366  | 359  | 345  |
| 64656 | Mrps23  | mitochondrial ribosomal protein S23                                                         | 161  | 147  | 157  |
| 64657 | Mrps10  | mitochondrial ribosomal protein S10                                                         | 213  | 196  | 208  |
| 64658 | Mrps25  | mitochondrial ribosomal protein S25                                                         | 161  | 164  | 156  |
| 64659 | Mrps14  | mitochondrial ribosomal protein S14                                                         | 77   | 73   | 78   |
| 64660 | Mrps24  | mitochondrial ribosomal protein S24                                                         | 223  | 228  | 207  |
| 64697 | Keg1    | kidney expressed gene 1                                                                     | 0    | 0    | 0    |
| 64704 | Htra2   | HtrA serine peptidase 2                                                                     | 26   | 29   | 24   |
| 64833 | Acot10  | acyl-CoA thioesterase 10                                                                    | 0    | 0    | 0    |
| 65102 | Nif3l1  | Ngg1 interacting factor 3-like 1 ( <i>S. pombe</i> )                                        | 79   | 79   | 79   |
| 65111 | Dap3    | death associated protein 3                                                                  | 66   | 63   | 76   |
| 65967 | Eefsec  | eukaryotic elongation factor, selenocysteine-tRNA-specific                                  | 315  | 317  | 312  |

|       |               |                                                                        |      |      |      |
|-------|---------------|------------------------------------------------------------------------|------|------|------|
| 66043 | Atp5d         | ATP synthase, H+ transporting, mitochondrial F1 complex, delta subunit | 0    | 0    | 0    |
| 66046 | Ndufb5        | NADH dehydrogenase (ubiquinone) 1 beta subcomplex, 5                   | 94   | 105  | 102  |
| 66047 | Mrpl54        | mitochondrial ribosomal protein L54                                    | 10   | 12   | 14   |
| 66052 | Sdhc          | succinate dehydrogenase complex, subunit C, integral membrane protein  | 40   | 38   | 41   |
| 66067 | Gtpbp8        | GTP-binding protein 8 (putative)                                       | 52   | 51   | 53   |
| 66071 | Ethe1         | ethylmalonic encephalopathy 1                                          | 47   | 59   | 55   |
| 66072 | 0610038F07Rik | RIKEN cDNA 0610038F07 gene                                             | 0    | 0    | 0    |
| 66072 | 0710008K08Rik | RIKEN cDNA 0710008K08 gene                                             | 0    | 0    | 0    |
| 66075 | Chchd3        | coiled-coil-helix-coiled-coil-helix domain containing 3                | 843  | 872  | 833  |
| 66077 | Aurkaip1      | aurora kinase A interacting protein 1                                  | 39   | 33   | 36   |
| 66084 | Rmnd1         | required for meiotic nuclear division 1 homolog (S. cerevisiae)        | 4    | 4    | 2    |
| 66091 | Ndufa3        | NADH dehydrogenase (ubiquinone) 1 alpha subcomplex, 3                  | 19   | 18   | 18   |
| 66092 | Ghitm         | growth hormone inducible transmembrane protein                         | 2999 | 3044 | 3023 |
| 66108 | Ndufa9        | NADH dehydrogenase (ubiquinone) 1 alpha subcomplex, 9                  | 150  | 147  | 147  |
| 66112 | Mosc1         | MOCO sulphurase C-terminal domain containing 1                         | 116  | 117  | 119  |
| 66114 | Wbscr18       | Williams-Beuren syndrome chromosome region 18 homolog (human)          | 0    | 0    | 0    |
| 66117 | 1110001J03Rik | RIKEN cDNA 1110001J03 gene                                             | 0    | 0    | 0    |
| 66119 | 1110002E23Rik | RIKEN cDNA 1110002E23 gene                                             | 0    | 0    | 0    |
| 66121 | Chchd1        | coiled-coil-helix-coiled-coil-helix domain containing 1                | 10   | 11   | 10   |
| 66128 | Mrps36        | mitochondrial ribosomal protein S36                                    | 59   | 56   | 62   |
| 66142 | Cox7b         | cytochrome c oxidase subunit VIIb                                      | 0    | 0    | 0    |
| 66148 | Dnajc15       | DnaJ (Hsp40) homolog, subfamily C, member 15                           | 132  | 138  | 138  |
| 66152 | 1110020P15Rik | RIKEN cDNA 1110020P15 gene                                             | 0    | 0    | 0    |
| 66154 | Tmem14c       | transmembrane protein 14C                                              | 87   | 86   | 91   |
| 66163 | Mrpl4         | mitochondrial ribosomal protein L4                                     | 53   | 57   | 47   |
| 66169 | Tomm7         | translocase of outer mitochondrial membrane 7 homolog (yeast)          | 78   | 80   | 86   |
| 66198 | Them5         | thioesterase superfamily member 5                                      | 70   | 68   | 66   |

|       |               |                                                                |      |      |      |
|-------|---------------|----------------------------------------------------------------|------|------|------|
| 66218 | Ndubf9        | NADH dehydrogenase (ubiquinone) 1 beta subcomplex, 9           | 188  | 190  | 193  |
| 66223 | Mrpl35        | mitochondrial ribosomal protein L35                            | 166  | 159  | 164  |
| 66230 | Mrps28        | mitochondrial ribosomal protein S28                            | 371  | 387  | 381  |
| 66242 | Mrps16        | mitochondrial ribosomal protein S16                            | 76   | 77   | 78   |
| 66258 | Mrps17        | mitochondrial ribosomal protein S17                            | 18   | 23   | 21   |
| 66271 | Tmem126a      | transmembrane protein 126A                                     | 40   | 43   | 45   |
| 66272 | 1810020G14Rik | RIKEN cDNA 1810020G14 gene                                     | 0    | 0    | 0    |
| 66292 | Mrps21        | mitochondrial ribosomal protein S21                            | 40   | 38   | 35   |
| 66302 | 2410005O16Rik | RIKEN cDNA 2410005O16 gene                                     | 0    | 0    | 0    |
| 66346 | 1700029P11Rik | RIKEN cDNA 1700029P11 gene                                     | 0    | 0    | 0    |
| 66349 | 2310004L02Rik | RIKEN cDNA 2310004L02 gene                                     | 0    | 0    | 0    |
| 66359 | 2310005N03Rik | RIKEN cDNA 2310005N03 gene                                     | 0    | 0    | 0    |
| 66365 | Ccdc90b       | coiled-coil domain containing 90B                              | 1991 | 2012 | 1950 |
| 66369 | Dus2l         | dihydrouridine synthase 2-like (SMM1, <i>S. cerevisiae</i> )   | 65   | 63   | 69   |
| 66377 | Ndufc1        | NADH dehydrogenase (ubiquinone) 1, subcomplex unknown, 1       | 0    | 0    | 0    |
| 66379 | 2310016M24Rik | RIKEN cDNA 2310016M24 gene                                     | 0    | 0    | 0    |
| 66383 | Iscu          | IscU iron-sulfur cluster scaffold homolog ( <i>E. coli</i> )   | 37   | 36   | 33   |
| 66387 | Nudt8         | nudix (nucleoside diphosphate linked moiety X)-type motif 8    | 12   | 11   | 15   |
| 66390 | 2310042G06Rik | RIKEN cDNA 2310042G06 gene                                     | 0    | 0    | 0    |
| 66399 | Tsfn          | Ts translation elongation factor, mitochondrial                | 53   | 52   | 55   |
| 66400 | Alkbh7        | alkB, alkylation repair homolog 7 ( <i>E. coli</i> )           | 0    | 0    | 0    |
| 66401 | Nudt2         | nudix (nucleoside diphosphate linked moiety X)-type motif 2    | 51   | 48   | 46   |
| 66407 | Mrps15        | mitochondrial ribosomal protein S15                            | 44   | 45   | 48   |
| 66410 | Mterfd1       | MTERF domain containing 1                                      | 168  | 172  | 151  |
| 66414 | Ndufa12       | NADH dehydrogenase (ubiquinone) 1 alpha subcomplex, 12         | 195  | 196  | 196  |
| 66416 | Ndufa7        | NADH dehydrogenase (ubiquinone) 1 alpha subcomplex, 7 (B14.5a) | 24   | 22   | 25   |
| 66419 | Mrpl11        | mitochondrial ribosomal protein L11                            | 0    | 0    | 0    |

|       |               |                                                                                                                  |     |     |     |
|-------|---------------|------------------------------------------------------------------------------------------------------------------|-----|-----|-----|
| 66427 | Cyb5b         | cytochrome b5 type B                                                                                             | 259 | 260 | 260 |
| 66431 | 1810049H13Rik | RIKEN cDNA 1810049H13 gene                                                                                       | 0   | 0   | 0   |
| 66433 | Chchd7        | coiled-coil-helix-coiled-coil-helix domain containing 7                                                          | 106 | 102 | 113 |
| 66437 | Fis1          | fission 1 (mitochondrial outer membrane) homolog (yeast)                                                         | 76  | 74  | 78  |
| 66445 | Cyc1          | cytochrome c-1                                                                                                   | 20  | 21  | 21  |
| 66448 | Mrpl20        | mitochondrial ribosomal protein L20                                                                              | 40  | 35  | 34  |
| 66449 | Magmas        | mitochondria-associated protein involved in granulocyte-macrophage colony-stimulating factor signal transduction | 0   | 0   | 0   |
| 66459 | Pigy          | phosphatidylinositol glycan anchor biosynthesis, class Y                                                         | 157 | 149 | 147 |
| 66461 | Ptpmt1        | protein tyrosine phosphatase, mitochondrial 1                                                                    | 0   | 0   | 0   |
| 66477 | Usmg5         | upregulated during skeletal muscle growth 5                                                                      | 0   | 0   | 0   |
| 66487 | 2010107H07Rik | RIKEN cDNA 2010107H07 gene                                                                                       | 0   | 0   | 0   |
| 66488 | 2010309E21Rik | RIKEN cDNA 2010309E21 gene                                                                                       | 0   | 0   | 0   |
| 66493 | Mrpl51        | mitochondrial ribosomal protein L51                                                                              | 31  | 33  | 30  |
| 66494 | 2610524G07Rik | RIKEN cDNA 2610524G07 gene                                                                                       | 0   | 0   | 0   |
| 66495 | Ndubf3        | NADH dehydrogenase (ubiquinone) 1 beta subcomplex 3                                                              | 142 | 141 | 137 |
| 66525 | Timm50        | translocase of inner mitochondrial membrane 50 homolog (yeast)                                                   | 0   | 0   | 0   |
| 66536 | Nipsnap3a     | nipsnap homolog 3A (C. elegans)                                                                                  | 57  | 59  | 51  |
| 66559 | Metap1        | methionine aminopeptidase-like 1                                                                                 | 0   | 0   | 0   |
| 66576 | Uqcrh         | ubiquinol-cytochrome c reductase hinge protein                                                                   | 31  | 31  | 31  |
| 66586 | Crls1         | cardiolipin synthase 1                                                                                           | 86  | 89  | 85  |
| 66587 | Fastk         | Fas-activated serine/threonine kinase                                                                            | 25  | 28  | 26  |
| 66592 | Stoml2        | stomatin (Epb7.2)-like 2                                                                                         | 26  | 24  | 23  |
| 66593 | Diablo        | diablo homolog (Drosophila)                                                                                      | 79  | 78  | 79  |
| 66594 | Uqcr          | ubiquinol-cytochrome c reductase (6.4kD) subunit                                                                 | 0   | 0   | 0   |
| 66628 | Thg1l         | tRNA-histidine guanylyltransferase 1-like (S. cerevisiae)                                                        | 49  | 45  | 47  |
| 66658 | Ccdc51        | coiled-coil domain containing 51                                                                                 | 17  | 18  | 15  |
| 66659 | Acp6          | acid phosphatase 6, lysophosphatidic                                                                             | 241 | 228 | 227 |

|       |               |                                                                                |      |      |      |
|-------|---------------|--------------------------------------------------------------------------------|------|------|------|
| 66690 | 4432406C05Rik | RIKEN cDNA 4432406C05 gene                                                     | 0    | 0    | 0    |
| 66694 | Uqcrfs1       | ubiquinol-cytochrome c reductase, Rieske iron-sulfur polypeptide 1             | 409  | 408  | 399  |
| 66701 | Spryd4        | SPRY domain containing 4                                                       | 41   | 38   | 39   |
| 66706 | 4733401H18Rik | RIKEN cDNA 4733401H18 gene                                                     | 0    | 0    | 0    |
| 66736 | Ttc35         | tetratricopeptide repeat domain 35                                             | 733  | 760  | 721  |
| 66821 | Bcs1l         | BCS1-like (yeast)                                                              | 19   | 19   | 17   |
| 66834 | Them2         | thioesterase superfamily member 2                                              | 0    | 0    | 0    |
| 66836 | 0610006I08Rik | RIKEN cDNA 0610006I08 gene                                                     | 0    | 0    | 0    |
| 66839 | 0610009O20Rik | RIKEN cDNA 0610009O20 gene                                                     | 0    | 0    | 0    |
| 66841 | Etfdh         | electron transferring flavoprotein, dehydrogenase                              | 47   | 52   | 46   |
| 66845 | Mrpl33        | mitochondrial ribosomal protein L33                                            | 226  | 221  | 226  |
| 66865 | Pmpca         | peptidase (mitochondrial processing) alpha                                     | 28   | 22   | 26   |
| 66885 | Acad8         | acyl-Coenzyme A dehydrogenase, short/branched chain                            | 160  | 173  | 166  |
| 66904 | Pccb          | propionyl Coenzyme A carboxylase, beta polypeptide                             | 567  | 559  | 566  |
| 66916 | Ndufb7        | NADH dehydrogenase (ubiquinone) 1 beta subcomplex, 7                           | 52   | 62   | 59   |
| 66925 | Sdhd          | succinate dehydrogenase complex, subunit D, integral membrane protein          | 56   | 49   | 52   |
| 66945 | Sdha          | succinate dehydrogenase complex, subunit A, flavoprotein (Fp)                  | 45   | 40   | 42   |
| 66948 | Acad8         | acyl-Coenzyme A dehydrogenase family, member 8                                 | 99   | 99   | 102  |
| 66959 | Dusp26        | dual specificity phosphatase 26 (putative)                                     | 2401 | 2410 | 2395 |
| 66966 | Trit1         | tRNA isopentenyltransferase 1                                                  | 139  | 151  | 144  |
| 66972 | Slc25a23      | solute carrier family 25 (mitochondrial carrier; phosphate carrier), member 23 | 25   | 25   | 26   |
| 66973 | Mrps18b       | mitochondrial ribosomal protein S18B                                           | 7    | 9    | 7    |
| 66988 | Lap3          | leucine aminopeptidase 3                                                       | 83   | 84   | 81   |
| 67003 | Uqcrc2        | ubiquinol cytochrome c reductase core protein 2                                | 89   | 90   | 93   |
| 67013 | Oma1          | OMA1 homolog, zinc metallopeptidase ( <i>S. cerevisiae</i> )                   | 1382 | 1390 | 1382 |
| 67036 | Mrpl45        | mitochondrial ribosomal protein L45                                            | 99   | 93   | 95   |
| 67041 | Oxct1         | 3-oxoacid CoA transferase 1                                                    | 38   | 39   | 37   |

|       |               |                                                                             |     |     |     |
|-------|---------------|-----------------------------------------------------------------------------|-----|-----|-----|
| 67044 | Higd2a        | HIG1 domain family, member 2A                                               | 28  | 29  | 29  |
| 67067 | 2010100O12Rik | RIKEN cDNA 2010100O12 gene                                                  | 0   | 0   | 0   |
| 67092 | Gatm          | glycine amidinotransferase (L-arginine:glycine amidinotransferase)          | 188 | 190 | 191 |
| 67096 | Mmachc        | methylmalonic aciduria cblC type, with homocystinuria                       | 27  | 30  | 33  |
| 67105 | 1700034H14Rik | RIKEN cDNA 1700034H14 gene                                                  | 0   | 0   | 0   |
| 67126 | Atp5e         | ATP synthase, H+ transporting, mitochondrial F1 complex, epsilon subunit    | 32  | 28  | 26  |
| 67130 | Ndufa6        | NADH dehydrogenase (ubiquinone) 1 alpha subcomplex, 6 (B14)                 | 40  | 42  | 44  |
| 67145 | Tomm34        | translocase of outer mitochondrial membrane 34                              | 59  | 64  | 56  |
| 67164 | 2610209A20Rik | RIKEN cDNA 2610209A20 gene                                                  | 0   | 0   | 0   |
| 67184 | Ndufa13       | NADH dehydrogenase (ubiquinone) 1 alpha subcomplex, 13                      | 87  | 93  | 91  |
| 67201 | 2700085E05Rik | RIKEN cDNA 2700085E05 gene                                                  | 0   | 0   | 0   |
| 67211 | 2810037C14Rik | RIKEN cDNA 2810037C14 gene                                                  | 0   | 0   | 0   |
| 67212 | Mrpl55        | mitochondrial ribosomal protein L55                                         | 8   | 8   | 7   |
| 67247 | Mosc2         | MOCO sulphurase C-terminal domain containing 2                              | 71  | 74  | 80  |
| 67264 | Ndufb8        | NADH dehydrogenase (ubiquinone) 1 beta subcomplex 8                         | 0   | 0   | 0   |
| 67267 | 2900010M23Rik | RIKEN cDNA 2900010M23 gene                                                  | 0   | 0   | 0   |
| 67270 | D10Erttd322e  | DNA segment, Chr 10, ERATO Doi 322, expressed                               | 0   | 0   | 0   |
| 67273 | Ndufa10       | NADH dehydrogenase (ubiquinone) 1 alpha subcomplex 10                       | 431 | 421 | 423 |
| 67283 | Slc25a19      | solute carrier family 25 (mitochondrial deoxynucleotide carrier), member 19 | 115 | 122 | 120 |
| 67308 | Mrpl46        | mitochondrial ribosomal protein L46                                         | 82  | 83  | 84  |
| 67388 | 1110008F13Rik | RIKEN cDNA 1110008F13 gene                                                  | 0   | 0   | 0   |
| 67390 | Rnmt1         | RNA methyltransferase like 1                                                | 204 | 215 | 208 |
| 67414 | Mfn1          | mitofusin 1                                                                 | 134 | 136 | 139 |
| 67417 | Ears2         | glutamyl-tRNA synthetase 2 (mitochondrial)(putative)                        | 61  | 64  | 62  |
| 67426 | Cabc1         | chaperone, ABC1 activity of bc1 complex like (S. pombe)                     | 0   | 0   | 0   |
| 67432 | 0610010D20Rik | RIKEN cDNA 0610010D20 gene                                                  | 0   | 0   | 0   |
| 67440 | Papd1         | PAP associated domain containing 1                                          | 0   | 0   | 0   |

|       |               |                                                                                  |      |      |      |
|-------|---------------|----------------------------------------------------------------------------------|------|------|------|
| 67441 | Isoc2b        | isochorismatase domain containing 2b                                             | 0    | 0    | 0    |
| 67453 | Slc25a46      | solute carrier family 25, member 46                                              | 227  | 226  | 239  |
| 67460 | Decr1         | 2,4-dienoyl CoA reductase 1, mitochondrial                                       | 92   | 104  | 94   |
| 67472 | Mtfr1         | mitochondrial fission regulator 1                                                | 132  | 138  | 126  |
| 67530 | Uqcrb         | ubiquinol-cytochrome c reductase binding protein                                 | 1010 | 1011 | 975  |
| 67554 | Slc25a30      | solute carrier family 25, member 30                                              | 128  | 117  | 115  |
| 67582 | Slc25a26      | solute carrier family 25 (mitochondrial carrier, phosphate carrier), member 26   | 535  | 542  | 541  |
| 67634 | Ftmt          | ferritin mitochondrial                                                           | 1677 | 1712 | 1667 |
| 67636 | Lyrn5         | LYR motif containing 5                                                           | 51   | 49   | 53   |
| 67680 | Sdhb          | succinate dehydrogenase complex, subunit B, iron sulfur (lp)                     | 105  | 104  | 98   |
| 67681 | Mrpl18        | mitochondrial ribosomal protein L18                                              | 7    | 8    | 8    |
| 67707 | Mrpl24        | mitochondrial ribosomal protein L24                                              | 34   | 30   | 36   |
| 67712 | Slc25a37      | solute carrier family 25, member 37                                              | 133  | 136  | 134  |
| 67713 | Dnajc19       | DnaJ (Hsp40) homolog, subfamily C, member 19                                     | 0    | 0    | 0    |
| 67725 | Nudt13        | nudix (nucleoside diphosphate linked moiety X)-type motif 13                     | 111  | 107  | 109  |
| 67759 | 5033414D02Rik | RIKEN cDNA 5033414D02 gene                                                       | 0    | 0    | 0    |
| 67809 | 1200015F23Rik | RIKEN cDNA 1200015F23 gene                                                       | 0    | 0    | 0    |
| 67811 | Poldip2       | polymerase (DNA-directed), delta interacting protein 2                           | 33   | 34   | 33   |
| 67834 | Idh3a         | isocitrate dehydrogenase 3 (NAD+) alpha                                          | 138  | 129  | 129  |
| 67840 | Mrp63         | mitochondrial ribosomal protein 63                                               | 78   | 80   | 75   |
| 67844 | Rab32         | RAB32, member RAS oncogene family                                                | 907  | 926  | 897  |
| 67851 | 1700021F05Rik | RIKEN cDNA 1700021F05 gene                                                       | 0    | 0    | 0    |
| 67856 | Echdc3        | enoyl Coenzyme A hydratase domain containing 3                                   | 244  | 244  | 253  |
| 67861 | 2310005E10Rik | RIKEN cDNA 2310005E10 gene                                                       | 0    | 0    | 0    |
| 67863 | Slc25a11      | solute carrier family 25 (mitochondrial carrier oxoglutarate carrier), member 11 | 8    | 8    | 9    |
| 67871 | Mrrf          | mitochondrial ribosome recycling factor                                          | 41   | 38   | 44   |
| 67876 | Coq10b        | coenzyme Q10 homolog B (S. cerevisiae)                                           | 75   | 85   | 78   |

|       |               |                                                                                           |     |     |     |
|-------|---------------|-------------------------------------------------------------------------------------------|-----|-----|-----|
| 67883 | Uxs1          | UDP-glucuronate decarboxylase 1                                                           | 266 | 264 | 276 |
| 67892 | 1810063B05Rik | RIKEN cDNA 1810063B05 gene                                                                | 0   | 0   | 0   |
| 67899 | 2010110K16Rik | RIKEN cDNA 2010110K16 gene                                                                | 0   | 0   | 0   |
| 67900 | 1700020C11Rik | RIKEN cDNA 1700020C11 gene                                                                | 0   | 0   | 0   |
| 67914 | Coq9          | coenzyme Q9 homolog (yeast)                                                               | 23  | 25  | 28  |
| 67942 | Atp5g2        | ATP synthase, H+ transporting, mitochondrial F0 complex, subunit c (subunit 9), isoform 2 | 61  | 60  | 58  |
| 67952 | Tomm20        | translocase of outer mitochondrial membrane 20 homolog (yeast)                            | 493 | 490 | 490 |
| 67979 | Atad1         | ATPase family, AAA domain containing 1                                                    | 186 | 188 | 181 |
| 67994 | Mrps11        | mitochondrial ribosomal protein S11                                                       | 81  | 86  | 84  |
| 68002 | 1110058L19Rik | RIKEN cDNA 1110058L19 gene                                                                | 0   | 0   | 0   |
| 68015 | Trap1         | TNF receptor-associated protein 1                                                         | 227 | 228 | 225 |
| 68017 | Ftsj2         | FtsJ homolog 2 (E. coli)                                                                  | 12  | 15  | 16  |
| 68020 | 2810002N01Rik | RIKEN cDNA 2810002N01 gene                                                                | 0   | 0   | 0   |
| 68021 | Bphl          | biphenyl hydrolase-like (serine hydrolase, breast epithelial mucin-associated antigen)    | 103 | 95  | 97  |
| 68055 | Atp5s         | ATP synthase, H+ transporting, mitochondrial F0 complex, subunit s                        | 54  | 52  | 49  |
| 68066 | Slc25a39      | solute carrier family 25, member 39                                                       | 45  | 44  | 49  |
| 68087 | Dcakd         | dephospho-CoA kinase domain containing                                                    | 79  | 83  | 79  |
| 68095 | Ociad1        | O CIA domain containing 1                                                                 | 102 | 106 | 98  |
| 68115 | 9430016H08Rik | RIKEN cDNA 9430016H08 gene                                                                | 0   | 0   | 0   |
| 68117 | 9430083G14Rik | RIKEN cDNA 9430083G14 gene                                                                | 0   | 0   | 0   |
| 68126 | Fahd2a        | fumarylacetoacetate hydrolase domain containing 2A                                        | 0   | 0   | 0   |
| 68133 | Gcsh          | glycine cleavage system protein H (aminomethyl carrier)                                   | 0   | 0   | 0   |
| 68165 | B230118G17Rik | RIKEN cDNA B230118G17 gene                                                                | 0   | 0   | 0   |
| 68194 | Ndufb4        | NADH dehydrogenase (ubiquinone) 1 beta subcomplex 4                                       | 256 | 269 | 252 |
| 68197 | Ndufc2        | NADH dehydrogenase (ubiquinone) 1, subcomplex unknown, 2                                  | 63  | 63  | 57  |
| 68198 | Ndufb2        | NADH dehydrogenase (ubiquinone) 1 beta subcomplex, 2                                      | 197 | 191 | 200 |
| 68202 | Ndufa5        | NADH dehydrogenase (ubiquinone) 1 alpha subcomplex, 5                                     | 16  | 14  | 14  |

|       |               |                                                                                   |     |     |     |
|-------|---------------|-----------------------------------------------------------------------------------|-----|-----|-----|
| 68263 | Pdhb          | pyruvate dehydrogenase (lipoamide) beta                                           | 148 | 155 | 153 |
| 68267 | Slc25a22      | solute carrier family 25 (mitochondrial carrier, glutamate), member 22            | 0   | 0   | 0   |
| 68291 | Mto1          | mitochondrial translation optimization 1 homolog (S. cerevisiae)                  | 53  | 50  | 52  |
| 68332 | 0610010E21Rik | RIKEN cDNA 0610010E21 gene                                                        | 0   | 0   | 0   |
| 68342 | Ndufb10       | NADH dehydrogenase (ubiquinone) 1 beta subcomplex, 10                             | 7   | 8   | 7   |
| 68346 | Sirt5         | sirtuin 5 (silent mating type information regulation 2 homolog) 5 (S. cerevisiae) | 126 | 119 | 124 |
| 68349 | Ndufs3        | NADH dehydrogenase (ubiquinone) Fe-S protein 3                                    | 24  | 23  | 25  |
| 68350 | 0610009K11Rik | RIKEN cDNA 0610009K11 gene                                                        | 0   | 0   | 0   |
| 68375 | Ndufa8        | NADH dehydrogenase (ubiquinone) 1 alpha subcomplex, 8                             | 93  | 85  | 88  |
| 68436 | 1100001I22Rik | RIKEN cDNA 1100001I22 gene                                                        | 0   | 0   | 0   |
| 68463 | Mrpl14        | mitochondrial ribosomal protein L14                                               | 444 | 422 | 421 |
| 68493 | 1110007M04Rik | RIKEN cDNA 1110007M04 gene                                                        | 0   | 0   | 0   |
| 68499 | Mrpl53        | mitochondrial ribosomal protein L53                                               | 0   | 0   | 0   |
| 68512 | 1110019J04Rik | RIKEN cDNA 1110019J04 gene                                                        | 0   | 0   | 0   |
| 68514 | Efha1         | EF hand domain family A1                                                          | 233 | 224 | 236 |
| 68537 | Mrpl13        | mitochondrial ribosomal protein L13                                               | 319 | 326 | 317 |
| 68565 | Mrps18a       | mitochondrial ribosomal protein S18A                                              | 148 | 145 | 145 |
| 68572 | Ict1          | immature colon carcinoma transcript 1                                             | 48  | 49  | 47  |
| 68576 | Hbxip         | hepatitis B virus x interacting protein                                           | 67  | 66  | 67  |
| 68607 | Serhl         | serine hydrolase-like                                                             | 0   | 0   | 0   |
| 68611 | Mrpl28        | mitochondrial ribosomal protein L28                                               | 33  | 35  | 29  |
| 68614 | Letmd1        | LETM1 domain containing 1                                                         | 101 | 93  | 93  |
| 68626 | Elac2         | elaC homolog 2 (E. coli)                                                          | 964 | 970 | 938 |
| 68636 | Fahd1         | fumarylacetoacetate hydrolase domain containing 1                                 | 62  | 61  | 60  |
| 68653 | Samm50        | sorting and assembly machinery component 50 homolog (S. cerevisiae)               | 76  | 82  | 73  |
| 68735 | Mrps18c       | mitochondrial ribosomal protein S18C                                              | 27  | 27  | 32  |
| 68738 | Acss1         | acyl-CoA synthetase short-chain family member 1                                   | 109 | 96  | 102 |

|       |               |                                                  |     |     |      |
|-------|---------------|--------------------------------------------------|-----|-----|------|
| 68758 | Abhd11        | abhydrolase domain containing 11                 | 14  | 12  | 18   |
| 68836 | Mrpl52        | mitochondrial ribosomal protein L52              | 18  | 15  | 20   |
| 68915 | Vars2l        | valyl-tRNA synthetase 2-like                     | 0   | 0   | 0    |
| 68917 | Hint2         | histidine triad nucleotide binding protein 2     | 20  | 19  | 16   |
| 68927 | Ptcd2         | pentatricopeptide repeat domain 2                | 200 | 201 | 201  |
| 68943 | Pink1         | PTEN induced putative kinase 1                   | 79  | 80  | 77   |
| 68971 | 1500001M20Rik | RIKEN cDNA 1500001M20 gene                       | 0   | 0   | 0    |
| 68972 | Tatdn3        | TatD DNase domain containing 3                   | 36  | 37  | 32   |
| 69029 | 1500032L24Rik | RIKEN cDNA 1500032L24 gene                       | 0   | 0   | 0    |
| 69046 | Hbld2         | HESB like domain containing 2                    | 0   | 0   | 0    |
| 69076 | Triap1        | TP53 regulated inhibitor of apoptosis 1          | 11  | 11  | 9    |
| 69089 | Oxa1l         | oxidase assembly 1-like                          | 169 | 171 | 168  |
| 69094 | Tmem160       | transmembrane protein 160                        | 0   | 0   | 0    |
| 69099 | 1810009N02Rik | RIKEN cDNA 1810009N02 gene                       | 0   | 0   | 0    |
| 69156 | Comtd1        | catechol-O-methyltransferase domain containing 1 | 199 | 202 | 193  |
| 69163 | Mrpl44        | mitochondrial ribosomal protein L44              | 130 | 138 | 120  |
| 69168 | Bola1         | bolA-like 1 (E. coli)                            | 51  | 47  | 49   |
| 69219 | Ddah1         | dimethylarginine dimethylaminohydrolase 1        | 371 | 351 | 353  |
| 69310 | Pacrg         | Park2 co-regulated                               | 654 | 675 | 665  |
| 69367 | Glrx2         | glutaredoxin 2 (thioltransferase)                | 95  | 97  | 88   |
| 69487 | 2310003L22Rik | RIKEN cDNA 2310003L22 gene                       | 0   | 0   | 0    |
| 69527 | Mrps9         | mitochondrial ribosomal protein S9               | 332 | 331 | 326  |
| 69536 | Hemk1         | HemK methyltransferase family member 1           | 51  | 62  | 52   |
| 69553 | 2310033K02Rik | RIKEN cDNA 2310033K02 gene                       | 0   | 0   | 0    |
| 69597 | Afg3l2        | AFG3(ATPase family gene 3)-like 2 (yeast)        | 98  | 99  | 98   |
| 69606 | Mtfmt         | mitochondrial methionyl-tRNA formyltransferase   | 49  | 50  | 51   |
| 69617 | Pitrm1        | pitrilysin metallepetidase 1                     | 981 | 999 | 1003 |

|       |               |                                                                                           |     |     |     |
|-------|---------------|-------------------------------------------------------------------------------------------|-----|-----|-----|
| 69634 | Clybl         | citrate lyase beta like                                                                   | 164 | 154 | 159 |
| 69662 | 2310061I04Rik | RIKEN cDNA 2310061I04 gene                                                                | 0   | 0   | 0   |
| 69692 | Hddc2         | HD domain containing 2                                                                    | 729 | 731 | 714 |
| 69702 | Ndufaf1       | NADH dehydrogenase (ubiquinone) 1 alpha subcomplex, assembly factor 1                     | 71  | 79  | 72  |
| 69802 | Cox11         | COX11 homolog, cytochrome c oxidase assembly protein (yeast)                              | 61  | 62  | 65  |
| 69875 | Ndufa11       | NADH dehydrogenase (ubiquinone) 1 alpha subcomplex 11                                     | 0   | 0   | 0   |
| 69906 | Slc25a32      | solute carrier family 25, member 32                                                       | 43  | 47  | 46  |
| 69923 | Mulk          | multiple substrate lipid kinase                                                           | 0   | 0   | 0   |
| 69955 | Fars2         | phenylalanine-tRNA synthetase 2 (mitochondrial)                                           | 802 | 806 | 778 |
| 69956 | Ptcd3         | Pentatricopeptide repeat domain 3                                                         | 100 | 101 | 101 |
| 70047 | Trnt1         | tRNA nucleotidyl transferase, CCA-adding, 1                                               | 61  | 61  | 62  |
| 70120 | Yars2         | tyrosyl-tRNA synthetase 2 (mitochondrial)                                                 | 188 | 188 | 189 |
| 70186 | 2310056P07Rik | RIKEN cDNA 2310056P07 gene                                                                | 0   | 0   | 0   |
| 70207 | Ccdc44        | coiled-coil domain containing 44                                                          | 0   | 0   | 0   |
| 70209 | Tmem143       | transmembrane protein 143                                                                 | 32  | 31  | 31  |
| 70223 | Nars          | asparaginyl-tRNA synthetase                                                               | 228 | 235 | 220 |
| 70257 | 2010107E04Rik | RIKEN cDNA 2010107E04 gene                                                                | 0   | 0   | 0   |
| 70316 | Ndufab1       | NADH dehydrogenase (ubiquinone) 1, alpha/beta subcomplex, 1                               | 89  | 88  | 90  |
| 70359 | Gtpbp3        | GTP binding protein 3                                                                     | 29  | 28  | 29  |
| 70383 | Cox10         | COX10 homolog, cytochrome c oxidase assembly protein, heme A: farnesyltransferase (yeast) | 200 | 204 | 196 |
| 70397 | Tmem70        | transmembrane protein 70                                                                  | 44  | 40  | 37  |
| 70456 | Brp44         | brain protein 44                                                                          | 34  | 30  | 27  |
| 70478 | Mipep         | mitochondrial intermediate peptidase                                                      | 345 | 350 | 345 |
| 70556 | Slc25a33      | solute carrier family 25, member 33                                                       | 283 | 274 | 278 |
| 70560 | Wars2         | tryptophanyl tRNA synthetase 2 (mitochondrial)                                            | 474 | 463 | 463 |
| 70564 | 5730469M10Rik | RIKEN cDNA 5730469M10 gene                                                                | 0   | 0   | 0   |
| 70603 | Mutyh         | mutY homolog (E. coli)                                                                    | 20  | 19  | 19  |

|       |               |                                                                                |      |      |      |
|-------|---------------|--------------------------------------------------------------------------------|------|------|------|
| 70789 | Kynu          | kynureninase (L-kynurenine hydrolase)                                          | 1395 | 1399 | 1368 |
| 70791 | Harsl         | histidyl-tRNA synthetase-like                                                  | 0    | 0    | 0    |
| 70911 | Phyhipl       | phytanoyl-CoA hydroxylase interacting protein-like                             | 952  | 919  | 902  |
| 71147 | Oxsm          | 3-oxoacyl-ACP synthase, mitochondrial                                          | 147  | 157  | 142  |
| 71238 | Acn9          | ACN9 homolog ( <i>S. cerevisiae</i> )                                          | 857  | 868  | 860  |
| 71361 | Aifm2         | apoptosis-inducing factor, mitochondrion-associated 2                          | 122  | 125  | 134  |
| 71365 | Pdss2         | prenyl (solaneyl) diphosphate synthase, subunit 2                              | 377  | 397  | 388  |
| 71679 | Atp5h         | ATP synthase, H <sup>+</sup> transporting, mitochondrial F0 complex, subunit d | 21   | 19   | 23   |
| 71701 | Pnpt1         | polyribonucleotide nucleotidyltransferase 1                                    | 412  | 424  | 409  |
| 71803 | Slc25a18      | solute carrier family 25 (mitochondrial carrier), member 18                    | 204  | 209  | 207  |
| 71807 | Tarsl1        | threonyl-tRNA synthetase-like 1                                                | 0    | 0    | 0    |
| 71832 | Csl           | citrate synthase like                                                          | 0    | 0    | 0    |
| 71883 | Coq2          | coenzyme Q2 homolog, prenyltransferase (yeast)                                 | 196  | 199  | 198  |
| 71886 | 2310002L09Rik | RIKEN cDNA 2310002L09 gene                                                     | 0    | 0    | 0    |
| 71911 | Bdh1          | 3-hydroxybutyrate dehydrogenase, type 1                                        | 471  | 453  | 452  |
| 71941 | 2310051N18Rik | RIKEN cDNA 2310051N18 gene                                                     | 0    | 0    | 0    |
| 71970 | 2410018M08Rik | RIKEN cDNA 2410018M08 gene                                                     | 0    | 0    | 0    |
| 71984 | Sars2         | seryl-aminoacyl-tRNA synthetase 2                                              | 21   | 14   | 20   |
| 71985 | Acad10        | acyl-Coenzyme A dehydrogenase family, member 10                                | 57   | 53   | 53   |
| 71986 | Ddx28         | DEAD (Asp-Glu-Ala-Asp) box polypeptide 28                                      | 20   | 20   | 18   |
| 71989 | Rpusd4        | RNA pseudouridylate synthase domain containing 4                               | 243  | 238  | 227  |
| 71998 | Slc25a35      | solute carrier family 25, member 35                                            | 18   | 23   | 21   |
| 72017 | Cyb5r1        | cytochrome b5 reductase 1                                                      | 35   | 40   | 39   |
| 72026 | Trmu          | tRNA 5-methylaminomethyl-2-thiouridylate methyltransferase                     | 229  | 219  | 228  |
| 72039 | Mccc1         | methylcrotonoyl-Coenzyme A carboxylase 1 (alpha)                               | 63   | 67   | 59   |
| 72085 | Osgepl1       | O-sialoglycoprotein endopeptidase-like 1                                       | 70   | 71   | 71   |
| 72113 | Adck1         | aarF domain containing kinase 1                                                | 502  | 505  | 516  |

|       |               |                                                                                                              |     |     |     |
|-------|---------------|--------------------------------------------------------------------------------------------------------------|-----|-----|-----|
| 72168 | Aifm3         | apoptosis-inducing factor, mitochondrion-associated 3                                                        | 75  | 76  | 71  |
| 72170 | Chchd4        | coiled-coil-helix-coiled-coil-helix domain containing 4                                                      | 77  | 75  | 82  |
| 72252 | 1700022A21Rik | RIKEN cDNA 1700022A21 gene                                                                                   | 0   | 0   | 0   |
| 72416 | Lrpprc        | leucine-rich PPR-motif containing                                                                            | 345 | 359 | 348 |
| 72446 | 2600010E01Rik | RIKEN cDNA 2600010E01 gene                                                                                   | 0   | 0   | 0   |
| 72479 | Hsd12         | hydroxysteroid dehydrogenase like 2                                                                          | 105 | 104 | 96  |
| 72535 | Aldh1b1       | aldehyde dehydrogenase 1 family, member B1                                                                   | 192 | 185 | 190 |
| 72552 | Hsd11         | hydroxysteroid dehydrogenase like 1                                                                          | 20  | 19  | 18  |
| 72562 | Pcbd2         | pterin 4 alpha carbinolamine dehydratase/dimerization cofactor of hepatocyte nuclear factor 1 alpha (TCF1) 2 | 85  | 83  | 97  |
| 72634 | Tdrkh         | tudor and KH domain containing protein                                                                       | 46  | 45  | 44  |
| 72795 | Ttc19         | tetratricopeptide repeat domain 19                                                                           | 240 | 234 | 230 |
| 72900 | Ndufv2        | NADH dehydrogenase (ubiquinone) flavoprotein 2                                                               | 42  | 49  | 46  |
| 72947 | Agxt2l2       | alanine-glyoxylate aminotransferase 2-like 2                                                                 | 408 | 404 | 419 |
| 72960 | Top1mt        | DNA topoisomerase 1, mitochondrial                                                                           | 107 | 112 | 109 |
| 73046 | Glrx5         | glutaredoxin 5 homolog (S. cerevisiae)                                                                       | 159 | 148 | 146 |
| 73078 | Pmpcb         | peptidase (mitochondrial processing) beta                                                                    | 108 | 106 | 108 |
| 73095 | Slc25a42      | solute carrier family 25, member 42                                                                          | 74  | 80  | 83  |
| 73132 | Slc25a16      | solute carrier family 25 (mitochondrial carrier, Graves disease autoantigen), member 16                      | 98  | 85  | 91  |
| 73297 | 1700034I23Rik | RIKEN cDNA 1700034I23 gene                                                                                   | 0   | 0   | 0   |
| 73333 | Slc25a31      | solute carrier family 25 (mitochondrial carrier; adenine nucleotide translocator), member 31                 | 141 | 148 | 137 |
| 73398 | 1700054F22Rik | RIKEN cDNA 1700054F22 gene                                                                                   | 0   | 0   | 0   |
| 73694 | 2410091C18Rik | RIKEN cDNA 2410091C18 gene                                                                                   | 0   | 0   | 0   |
| 73724 | Mcee          | methylmalonyl CoA epimerase                                                                                  | 141 | 147 | 140 |
| 73919 | Lym1          | LYR motif containing 1                                                                                       | 257 | 253 | 261 |
| 74011 | Slc25a27      | solute carrier family 25, member 27                                                                          | 46  | 46  | 45  |
| 74088 | 0610012H03Rik | RIKEN cDNA 0610012H03 gene                                                                                   | 0   | 0   | 0   |
| 74104 | Abcb6         | ATP-binding cassette, sub-family B (MDR/TAP), member 6                                                       | 26  | 30  | 26  |

|       |               |                                                                    |      |      |      |
|-------|---------------|--------------------------------------------------------------------|------|------|------|
| 74114 | Crot          | carnitine O-octanoyltransferase                                    | 261  | 266  | 249  |
| 74129 | Dmgdh         | dimethylglycine dehydrogenase precursor                            | 135  | 121  | 128  |
| 74142 | Lonp1         | lon peptidase 1, mitochondrial                                     | 20   | 19   | 18   |
| 74143 | Opa1          | optic atrophy 1 homolog (human)                                    | 563  | 548  | 562  |
| 74147 | Ehhadh        | enoyl-Coenzyme A, hydratase/3-hydroxyacyl Coenzyme A dehydrogenase | 128  | 123  | 123  |
| 74238 | Mterfd3       | MTERF domain containing 3                                          | 108  | 114  | 102  |
| 74239 | Iqce          | IQ motif containing E                                              | 72   | 65   | 68   |
| 74252 | Armc1         | armadillo repeat containing 1                                      | 1193 | 1239 | 1196 |
| 74316 | Hbld1         | HESB like domain containing 1                                      | 0    | 0    | 0    |
| 74450 | Pank2         | pantothenate kinase 2 (Hallervorden-Spatz syndrome)                | 70   | 74   | 70   |
| 74451 | Pgs1          | phosphatidylglycerophosphate synthase 1                            | 199  | 202  | 215  |
| 74528 | 8430406I07Rik | RIKEN cDNA 8430406I07 gene                                         | 0    | 0    | 0    |
| 74551 | Pck2          | phosphoenolpyruvate carboxykinase 2 (mitochondrial)                | 41   | 39   | 45   |
| 74600 | Mrpl47        | mitochondrial ribosomal protein L47                                | 37   | 35   | 32   |
| 74610 | Abcb8         | ATP-binding cassette, sub-family B (MDR/TAP), member 8             | 29   | 24   | 27   |
| 74686 | 4930443G12Rik | RIKEN cDNA 4930443G12 gene                                         | 0    | 0    | 0    |
| 74776 | Ppa2          | pyrophosphatase (inorganic) 2                                      | 392  | 396  | 398  |
| 74868 | Tmem65        | transmembrane protein 65                                           | 583  | 584  | 578  |
| 74934 | Armc4         | armadillo repeat containing 4                                      | 826  | 808  | 801  |
| 75398 | Mrpl32        | mitochondrial ribosomal protein L32                                | 115  | 122  | 109  |
| 75406 | Ndufs7        | NADH dehydrogenase (ubiquinone) Fe-S protein 7                     | 43   | 41   | 47   |
| 75420 | Secisbp2      | SECIS binding protein 2                                            | 199  | 192  | 197  |
| 75483 | Cox8c         | cytochrome c oxidase, subunit VIIIc                                | 93   | 91   | 88   |
| 75530 | Lym7          | LYR motif containing 7                                             | 110  | 104  | 110  |
| 75572 | Acyp2         | acylphosphatase 2, muscle type                                     | 370  | 375  | 381  |
| 75597 | Ndufa12l      | Ndufa12-like                                                       | 0    | 0    | 0    |
| 75619 | Fastkd2       | FAST kinase domains 2                                              | 288  | 298  | 294  |

|       |               |                                                                      |     |     |     |
|-------|---------------|----------------------------------------------------------------------|-----|-----|-----|
| 75778 | Them4         | thioesterase superfamily member 4                                    | 214 | 204 | 213 |
| 75805 | Nln           | neurolysin (metallopeptidase M3 family)                              | 244 | 257 | 245 |
| 75986 | Agmat         | agmatine ureohydrolase (agmatinase)                                  | 91  | 80  | 80  |
| 76137 | Ccdc90a       | coiled-coil domain containing 90A                                    | 175 | 173 | 181 |
| 76178 | 6330578E17Rik | RIKEN cDNA 6330578E17 gene                                           | 0   | 0   | 0   |
| 76187 | Adhfe1        | alcohol dehydrogenase, iron containing, 1                            | 75  | 71  | 69  |
| 76263 | Gstk1         | glutathione S-transferase kappa 1                                    | 0   | 0   | 0   |
| 76308 | Rab1b         | RAB1B, member RAS oncogene family                                    | 0   | 0   | 0   |
| 76366 | Mtif3         | mitochondrial translational initiation factor 3                      | 173 | 165 | 161 |
| 76467 | Msrb2         | methionine sulfoxide reductase B2                                    | 328 | 320 | 311 |
| 76563 | Qrsl1         | glutaminyl-tRNA synthase (glutamine-hydrolyzing)-like 1              | 399 | 394 | 400 |
| 76614 | Immt          | inner membrane protein, mitochondrial                                | 112 | 118 | 116 |
| 76722 | Ckmt2         | creatine kinase, mitochondrial 2                                     | 384 | 397 | 408 |
| 76784 | Mtif2         | mitochondrial translational initiation factor 2                      | 43  | 41  | 43  |
| 76826 | Nubpl         | nucleotide binding protein-like                                      | 600 | 628 | 601 |
| 76889 | Adck4         | aarF domain containing kinase 4                                      | 41  | 42  | 42  |
| 76916 | 4930455C21Rik | RIKEN cDNA 4930455C21 gene                                           | 0   | 0   | 0   |
| 76947 | 2310030N02Rik | RIKEN cDNA 2310030N02 gene                                           | 0   | 0   | 0   |
| 77219 | Zadh1         | zinc binding alcohol dehydrogenase, domain containing 1              | 0   | 0   | 0   |
| 77329 | C030010C08Rik | RIKEN cDNA C030010C08 gene                                           | 0   | 0   | 0   |
| 77407 | Rab35         | RAB35, member RAS oncogene family                                    | 134 | 121 | 124 |
| 77422 | C330018D20Rik | RIKEN cDNA C330018D20 gene                                           | 0   | 0   | 0   |
| 77619 | C330008K14Rik | RIKEN cDNA C330008K14 gene                                           | 0   | 0   | 0   |
| 77622 | Apex2         | apurinic/apyrimidinic endonuclease 2                                 | 0   | 0   | 0   |
| 77697 | Mmab          | methylmalonic aciduria (cobalamin deficiency) type B homolog (human) | 82  | 75  | 80  |
| 77721 | Mrps5         | mitochondrial ribosomal protein S5                                   | 0   | 0   | 0   |
| 77981 | B230110C06Rik | RIKEN cDNA B230110C06 gene                                           | 0   | 0   | 0   |

|       |               |                                                                                  |      |      |      |
|-------|---------------|----------------------------------------------------------------------------------|------|------|------|
| 78038 | Mccc2         | methylcrotonoyl-Coenzyme A carboxylase 2 (beta)                                  | 260  | 261  | 271  |
| 78070 | Cpt1c         | carnitine palmitoyltransferase 1c                                                | 52   | 50   | 53   |
| 78330 | 1500032D16Rik | RIKEN cDNA 1500032D16 gene                                                       | 0    | 0    | 0    |
| 78523 | Mrpl9         | mitochondrial ribosomal protein L9                                               | 41   | 45   | 46   |
| 78617 | Cstad         | CSA-conditional, T cell activation-dependent protein                             | 0    | 0    | 0    |
| 78830 | Slc25a12      | solute carrier family 25 (mitochondrial carrier, Aralar), member 12              | 236  | 225  | 238  |
| 78920 | Dlst          | dihydrolipoamide S-succinyltransferase (E2 component of 2-oxo-glutarate complex) | 56   | 57   | 52   |
| 79044 | Mrps34        | mitochondrial ribosomal protein S34                                              | 0    | 0    | 1    |
| 79059 | Nme3          | expressed in non-metastatic cells 3                                              | 52   | 52   | 51   |
| 79464 | Lias          | lipoic acid synthetase                                                           | 65   | 56   | 56   |
| 80907 | Lactb         | lactamase, beta                                                                  | 131  | 140  | 131  |
| 80911 | Acox3         | acyl-Coenzyme A oxidase 3, pristanoyl                                            | 136  | 130  | 136  |
| 83408 | Gimap3        | GTPase, IMAP family member 3                                                     | 0    | 0    | 0    |
| 83885 | Slc25a2       | solute carrier family 25 (mitochondrial carrier, ornithine transporter) member 2 | 169  | 157  | 154  |
| 83945 | Dnaja3        | DnaJ (Hsp40) homolog, subfamily A, member 3                                      | 45   | 49   | 48   |
| 84682 | Cox4i2        | cytochrome c oxidase subunit IV isoform 2                                        | 124  | 124  | 126  |
| 85305 | Kars          | lysyl-tRNA synthetase                                                            | 23   | 24   | 24   |
| 93692 | Glrx          | glutaredoxin                                                                     | 307  | 312  | 301  |
| 93734 | Mpv17l        | Mpv17 transgene, kidney disease mutant-like                                      | 0    | 0    | 0    |
| 93747 | Echs1         | enoyl Coenzyme A hydratase, short chain, 1, mitochondrial                        | 31   | 33   | 28   |
| 93757 | Imp2l         | IMP2 inner mitochondrial membrane peptidase-like ( <i>S. cerevisiae</i> )        | 1322 | 1333 | 1312 |
| 94044 | Bcl2l13       | BCL2-like 13 (apoptosis facilitator)                                             | 133  | 127  | 125  |
| 94061 | Mrpl1         | mitochondrial ribosomal protein L1                                               | 278  | 270  | 274  |
| 94062 | Mrpl3         | mitochondrial ribosomal protein L3                                               | 720  | 730  | 725  |
| 94063 | Mrpl16        | mitochondrial ribosomal protein L16                                              | 93   | 89   | 91   |
| 94064 | Mrpl27        | mitochondrial ribosomal protein L27                                              | 32   | 30   | 30   |
| 94065 | Mrpl34        | mitochondrial ribosomal protein L34                                              | 6    | 5    | 7    |

|        |               |                                                                                                                                       |     |     |     |
|--------|---------------|---------------------------------------------------------------------------------------------------------------------------------------|-----|-----|-----|
| 94066  | Mrpl36        | mitochondrial ribosomal protein L36                                                                                                   | 176 | 190 | 189 |
| 94067  | Mrpl43        | mitochondrial ribosomal protein L43                                                                                                   | 16  | 17  | 19  |
| 94254  | Wbscr16       | Williams-Beuren syndrome chromosome region 16 homolog (human)                                                                         | 0   | 0   | 0   |
| 94279  | Sfxn2         | sideroflexin 2                                                                                                                        | 35  | 33  | 33  |
| 94280  | Sfxn3         | sideroflexin 3                                                                                                                        | 40  | 38  | 37  |
| 94281  | Sfxn4         | sideroflexin 4                                                                                                                        | 82  | 85  | 80  |
| 94282  | Sfxn5         | sideroflexin 5                                                                                                                        | 182 | 195 | 178 |
| 96979  | Ptges2        | prostaglandin E synthase 2                                                                                                            | 52  | 53  | 56  |
| 97212  | Hadha         | hydroxyacyl-Coenzyme A dehydrogenase/3-ketoacyl-Coenzyme A thiolase/enoyl-Coenzyme A hydratase (trifunctional protein), alpha subunit | 69  | 67  | 64  |
| 98314  | D2hgdh        | D-2-hydroxyglutarate dehydrogenase                                                                                                    | 0   | 0   | 0   |
| 98363  | Efhd1         | EF hand domain containing 1                                                                                                           | 140 | 139 | 147 |
| 99045  | Mrps26        | mitochondrial ribosomal protein S26                                                                                                   | 163 | 167 | 161 |
| 100705 | Acacb         | acetyl-Coenzyme A carboxylase beta                                                                                                    | 175 | 191 | 177 |
| 100900 | Hscb          | HscB iron-sulfur cluster co-chaperone homolog (E. coli)                                                                               | 46  | 35  | 39  |
| 100978 | Nfxl1         | nuclear transcription factor, X-box binding-like 1                                                                                    | 98  | 90  | 94  |
| 102060 | Gadd45gip1    | growth arrest and DNA-damage-inducible, gamma interacting protein 1                                                                   | 0   | 0   | 0   |
| 102436 | Lars2         | leucyl-tRNA synthetase, mitochondrial                                                                                                 | 287 | 277 | 281 |
| 102632 | Acad11        | acyl-Coenzyme A dehydrogenase family, member 11                                                                                       | 80  | 82  | 78  |
| 103172 | Ndg2          | Nur77 downstream gene 2                                                                                                               | 0   | 0   | 0   |
| 103466 | C630002B14Rik | RIKEN cDNA C630002B14 gene                                                                                                            | 0   | 0   | 0   |
| 103775 | Slc25a41      | solute carrier family 25, member 41                                                                                                   | 0   | 0   | 0   |
| 103850 | Nt5m          | 5',3'-nucleotidase, mitochondrial                                                                                                     | 138 | 135 | 145 |
| 104086 | Cyp27a1       | cytochrome P450, family 27, subfamily a, polypeptide 1                                                                                | 116 | 105 | 122 |
| 104112 | Acly          | ATP citrate lyase                                                                                                                     | 97  | 92  | 89  |
| 104130 | Ndubf11       | NADH dehydrogenase (ubiquinone) 1 beta subcomplex, 11                                                                                 | 0   | 0   | 0   |
| 104174 | Gldc          | glycine decarboxylase                                                                                                                 | 268 | 276 | 262 |
| 104444 | Rexo2         | REX2, RNA exonuclease 2 homolog (S. cerevisiae)                                                                                       | 49  | 60  | 52  |

|                      |                                                                                                                                     |      |      |      |
|----------------------|-------------------------------------------------------------------------------------------------------------------------------------|------|------|------|
| 104458 Rars          | arginyl-tRNA synthetase                                                                                                             | 232  | 249  | 236  |
| 104776 Aldh6a1       | aldehyde dehydrogenase family 6, subfamily A1                                                                                       | 39   | 45   | 44   |
| 104910 AI132487      | expressed sequence AI132487                                                                                                         | 0    | 0    | 0    |
| 105014 Rdh14         | retinol dehydrogenase 14 (all-trans and 9-cis)                                                                                      | 993  | 992  | 961  |
| 105675 Ppif          | peptidylprolyl isomerase F (cyclophilin F)                                                                                          | 147  | 155  | 142  |
| 106557 Ldhal6b       | lactate dehydrogenase A-like 6B                                                                                                     | 567  | 571  | 572  |
| 107029 Me2           | malic enzyme 2, NAD(+)-dependent, mitochondrial                                                                                     | 141  | 131  | 134  |
| 107146 Glyat         | glycine-N-acyltransferase                                                                                                           | 96   | 104  | 95   |
| 107375 AW491445      | expressed sequence AW491445                                                                                                         | 0    | 0    | 0    |
| 107476 Acaca         | acetyl-Coenzyme A carboxylase alpha                                                                                                 | 448  | 455  | 450  |
| 107569 Nt5c3         | 5'-nucleotidase, cytosolic III                                                                                                      | 155  | 160  | 157  |
| 107732 Mrpl10        | mitochondrial ribosomal protein L10                                                                                                 | 11   | 10   | 14   |
| 107733 Mrpl41        | mitochondrial ribosomal protein L41                                                                                                 | 15   | 18   | 14   |
| 107734 Mrpl30        | mitochondrial ribosomal protein L30                                                                                                 | 36   | 33   | 33   |
| 107747 Aldh111       | aldehyde dehydrogenase 1 family, member L1                                                                                          | 193  | 173  | 184  |
| 107885 Mthfs         | 5, 10-methenyltetrahydrofolate synthetase                                                                                           | 543  | 550  | 535  |
| 108037 Shmt2         | serine hydroxymethyl transferase 2 (mitochondrial)                                                                                  | 24   | 20   | 21   |
| 108147 Atic          | 5-aminoimidazole-4-carboxamide ribonucleotide formyltransferase/IMP cyclohydrolase                                                  | 306  | 304  | 313  |
| 108156 Mthfd1        | methylenetetrahydrofolate dehydrogenase (NADP+ dependent), methenyltetrahydrofolate cyclohydrolase, formyltetrahydrofolate synthase | 105  | 102  | 103  |
| 108645 Mat2b         | methionine adenosyltransferase II, beta                                                                                             | 4751 | 4810 | 4771 |
| 108654 4933403F05Rik | RIKEN cDNA 4933403F05 gene                                                                                                          | 0    | 0    | 0    |
| 108682 Gpt2          | glutamic pyruvate transaminase (alanine aminotransferase) 2                                                                         | 160  | 163  | 151  |
| 108755 Lym2          | LYR motif containing 2                                                                                                              | 0    | 0    | 0    |
| 108841 Rdh13         | retinol dehydrogenase 13 (all-trans and 9-cis)                                                                                      | 84   | 94   | 85   |
| 108853 Mtrf1l        | mitochondrial translational release factor 1-like                                                                                   | 154  | 156  | 158  |
| 108888 Atad3a        | ATPase family, AAA domain containing 3A                                                                                             | 32   | 34   | 31   |
| 109093 Rarsl         | arginyl-tRNA synthetase-like                                                                                                        | 0    | 0    | 0    |

|        |         |                                                                                       |      |      |      |
|--------|---------|---------------------------------------------------------------------------------------|------|------|------|
| 109232 | Sccpdh  | saccharopine dehydrogenase (putative)                                                 | 319  | 331  | 323  |
| 109264 | Me3     | malic enzyme 3, NADP(+)-dependent, mitochondrial                                      | 507  | 495  | 477  |
| 109731 | Maob    | monoamine oxidase B                                                                   | 0    | 0    | 0    |
| 110074 | Dut     | deoxyuridine triphosphatase                                                           | 467  | 445  | 466  |
| 110115 | Cyp11b1 | cytochrome P450, family 11, subfamily b, polypeptide 1                                | 44   | 50   | 48   |
| 110196 | Fdps    | farnesyl diphosphate synthetase                                                       | 30   | 32   | 33   |
| 110198 | Akr7a5  | aldo-keto reductase family 7, member A5 (aflatoxin aldehyde reductase)                | 0    | 0    | 0    |
| 110265 | MsrA    | methionine sulfoxide reductase A                                                      | 623  | 631  | 631  |
| 110308 | Krt5    | keratin 5                                                                             | 62   | 58   | 58   |
| 110323 | Cox6b1  | cytochrome c oxidase, subunit VIb polypeptide 1                                       | 35   | 35   | 33   |
| 110391 | Qdpr    | quinoid dihydropteridine reductase                                                    | 829  | 839  | 837  |
| 110446 | Acat1   | acetyl-Coenzyme A acetyltransferase 1                                                 | 175  | 176  | 169  |
| 110460 | Acat2   | acetyl-Coenzyme A acetyltransferase 2                                                 | 68   | 63   | 62   |
| 110695 | Aldh7a1 | aldehyde dehydrogenase family 7, member A1                                            | 200  | 189  | 186  |
| 110821 | Pcca    | propionyl-Coenzyme A carboxylase, alpha polypeptide                                   | 561  | 558  | 555  |
| 110826 | Etfb    | electron transferring flavoprotein, beta polypeptide                                  | 57   | 62   | 60   |
| 110842 | EtfA    | electron transferring flavoprotein, alpha polypeptide                                 | 280  | 279  | 275  |
| 110959 | Nudt19  | nudix (nucleoside diphosphate linked moiety X)-type motif 19                          | 61   | 62   | 62   |
| 113868 | Acaa1a  | acetyl-Coenzyme A acyltransferase 1A                                                  | 0    | 0    | 0    |
| 114863 | Prosc   | proline synthetase co-transcribed                                                     | 0    | 0    | 0    |
| 114896 | Afg3l1  | AFG3(ATPase family gene 3)-like 1 (yeast)                                             | 0    | 0    | 0    |
| 117147 | AcsM1   | acyl-CoA synthetase medium-chain family member 1                                      | 164  | 169  | 163  |
| 118451 | Mrps2   | mitochondrial ribosomal protein S2                                                    | 36   | 41   | 38   |
| 121022 | Mrps6   | mitochondrial ribosomal protein S6                                                    | 305  | 302  | 302  |
| 170442 | Bbox1   | butyrobetaine (gamma), 2-oxoglutarate dioxygenase 1 (gamma-butyrobetaine hydroxylase) | 439  | 467  | 437  |
| 170718 | Idh3b   | isocitrate dehydrogenase 3 (NAD+) beta                                                | 24   | 25   | 23   |
| 170719 | Oxr1    | oxidation resistance 1                                                                | 2045 | 2073 | 2014 |

|                      |                                                         |     |     |     |
|----------------------|---------------------------------------------------------|-----|-----|-----|
| 170728 Rtn4ip1       | reticulon 4 interacting protein 1                       | 130 | 135 | 140 |
| 170731 Mfn2          | mitofusin 2                                             | 85  | 87  | 87  |
| 171210 Acot2         | acyl-CoA thioesterase 2                                 | 75  | 80  | 76  |
| 192136 AF397014      | cDNA sequence AF397014                                  | 0   | 0   | 0   |
| 192166 Sardh         | sarcosine dehydrogenase                                 | 337 | 331 | 333 |
| 192287 Slc25a36      | solute carrier family 25, member 36                     | 457 | 455 | 435 |
| 192654 Lypla3        | lysophospholipase 3                                     | 0   | 0   | 0   |
| 194744 Slc25a43      | solute carrier family 25, member 43                     | 0   | 0   | 0   |
| 207704 Gtpbp10       | GTP-binding protein 10 (putative)                       | 0   | 0   | 0   |
| 208194 Endogl1       | endonuclease G-like 1                                   | 0   | 0   | 0   |
| 208501 1810043H04Rik | RIKEN cDNA 1810043H04 gene                              | 0   | 0   | 0   |
| 208595 LOC208595     | mitochondrial transcription termination factor-like     | 0   | 0   | 0   |
| 209027 Pycr1         | pyrroline-5-carboxylate reductase 1                     | 0   | 0   | 0   |
| 209692 Dhdkd1        | dehydrogenase E1 and transketolase domain containing 1  | 74  | 75  | 73  |
| 210148 Slc30a6       | solute carrier family 30 (zinc transporter), member 6   | 153 | 151 | 160 |
| 210582 Coq10a        | coenzyme Q10 homolog A (yeast)                          | 48  | 47  | 52  |
| 211253 Mtrf1         | mitochondrial translational release factor 1            | 51  | 49  | 44  |
| 211389 Suox          | sulfite oxidase                                         | 64  | 66  | 62  |
| 211488 Gm237         | gene model 237, (NCBI)                                  | 0   | 0   | 0   |
| 211948 E430028B21Rik | RIKEN cDNA E430028B21 gene                              | 0   | 0   | 0   |
| 212032 Hk3           | hexokinase 3                                            | 193 | 189 | 193 |
| 212442 Lactb2        | lactamase, beta 2                                       | 106 | 99  | 99  |
| 212508 Mtg1          | mitochondrial GTPase 1 homolog ( <i>S. cerevisiae</i> ) | 35  | 36  | 41  |
| 212647 Aldh4a1       | aldehyde dehydrogenase 4 family, member A1              | 97  | 102 | 105 |
| 212679 Mars2         | methionine-tRNA synthetase 2 (mitochondrial)            | 173 | 169 | 168 |
| 213012 Abhd10        | abhydrolase domain containing 10                        | 154 | 156 | 156 |
| 213393 8430408G22Rik | RIKEN cDNA 8430408G22 gene                              | 0   | 0   | 0   |

|        |               |                                                                                             |     |     |     |
|--------|---------------|---------------------------------------------------------------------------------------------|-----|-----|-----|
| 214579 | Aldh5a1       | aldehyde dehydrogenase family 5, subfamily A1                                               | 133 | 126 | 132 |
| 214580 | Pstk          | phosphoseryl-tRNA kinase                                                                    | 62  | 63  | 63  |
| 214663 | Slc25a29      | solute carrier family 25 (mitochondrial carrier, palmitoylcarnitine transporter), member 29 | 57  | 48  | 49  |
| 214932 | Cecr5         | cat eye syndrome chromosome region, candidate 5 homolog (human)                             | 224 | 228 | 224 |
| 214952 | Rhot2         | ras homolog gene family, member T2                                                          | 30  | 26  | 29  |
| 215201 | 4732479N06Rik | RIKEN cDNA 4732479N06 gene                                                                  | 0   | 0   | 0   |
| 215951 | Lace1         | lactation elevated 1                                                                        | 290 | 293 | 284 |
| 215999 | Ccdc109a      | coiled-coil domain containing 109A                                                          | 328 | 332 | 343 |
| 216001 | Cbara1        | calcium binding atopy-related autoantigen 1                                                 | 355 | 339 | 342 |
| 216119 | A130042E20Rik | RIKEN cDNA A130042E20 gene                                                                  | 0   | 0   | 0   |
| 216151 | Polrmt        | polymerase (RNA) mitochondrial (DNA directed)                                               | 45  | 43  | 44  |
| 216188 | Aldh1l2       | aldehyde dehydrogenase 1 family, member L2                                                  | 245 | 237 | 234 |
| 216443 | Mars          | methionine-tRNA synthetase                                                                  | 44  | 39  | 36  |
| 216456 | Gls2          | glutaminase 2 (liver, mitochondrial)                                                        | 40  | 34  | 41  |
| 216767 | Mrpl22        | mitochondrial ribosomal protein L22                                                         | 21  | 22  | 21  |
| 216792 | A230051G13Rik | RIKEN cDNA A230051G13 gene                                                                  | 0   | 0   | 0   |
| 216821 | Tmem11        | transmembrane protein 11                                                                    | 110 | 108 | 106 |
| 217038 | Mrm1          | mitochondrial rRNA methyltransferase 1 homolog ( <i>S. cerevisiae</i> )                     | 391 | 390 | 396 |
| 217057 | Pthr2         | peptidyl-tRNA hydrolase 2                                                                   | 99  | 93  | 95  |
| 217149 | Mel13         | melanoma nuclear protein 13                                                                 | 0   | 0   | 0   |
| 217214 | Nags          | N-acetylglutamate synthase                                                                  | 63  | 64  | 60  |
| 217262 | Abca9         | ATP-binding cassette transporter sub-family A member 9                                      | 198 | 207 | 195 |
| 217378 | C330021A05Rik | RIKEN cDNA C330021A05 gene                                                                  | 0   | 0   | 0   |
| 217593 | Slc25a21      | solute carrier family 25 (mitochondrial oxodicarboxylate carrier), member 21                | 714 | 726 | 721 |
| 217666 | L2hgdh        | L-2-hydroxyglutarate dehydrogenase                                                          | 53  | 53  | 57  |
| 217707 | Coq6          | coenzyme Q6 homolog (yeast)                                                                 | 62  | 61  | 57  |
| 217830 | 9030617O03Rik | RIKEN cDNA 9030617O03 gene                                                                  | 0   | 0   | 0   |

|        |               |                                                                                |      |      |      |
|--------|---------------|--------------------------------------------------------------------------------|------|------|------|
| 218506 | Mrps27        | mitochondrial ribosomal protein S27                                            | 84   | 87   | 91   |
| 218629 | Dhx29         | DEAH (Asp-Glu-Ala-His) box polypeptide 29                                      | 78   | 82   | 79   |
| 218865 | Chdh          | choline dehydrogenase                                                          | 485  | 460  | 467  |
| 218885 | Oxnad1        | oxidoreductase NAD-binding domain containing 1                                 | 73   | 78   | 75   |
| 223262 | Timm8a2       | translocase of inner mitochondrial membrane 8 homolog a2 (yeast)               | 0    | 0    | 0    |
| 223665 | C030006K11Rik | RIKEN cDNA C030006K11 gene                                                     | 0    | 0    | 0    |
| 223696 | Tomm22        | translocase of outer mitochondrial membrane 22 homolog (yeast)                 | 35   | 39   | 37   |
| 223722 | Mcat          | malonyl CoA:ACP acyltransferase (mitochondrial)                                | 46   | 43   | 45   |
| 223753 | Cerk          | ceramide kinase                                                                | 200  | 186  | 194  |
| 224481 | Tfb1m         | transcription factor B1, mitochondrial                                         | 213  | 214  | 209  |
| 224530 | Acat3         | acetyl-Coenzyme A acetyltransferase 3                                          | 0    | 0    | 0    |
| 224805 | Aarsl         | alanyl-tRNA synthetase like                                                    | 0    | 0    | 0    |
| 224904 | 2410015M20Rik | RIKEN cDNA 2410015M20 gene                                                     | 0    | 0    | 0    |
| 225655 | BC019561      | cDNA sequence BC019561                                                         | 0    | 0    | 0    |
| 225791 | Zadh2         | zinc binding alcohol dehydrogenase, domain containing 2                        | 635  | 628  | 631  |
| 225887 | Ndufs8        | NADH dehydrogenase (ubiquinone) Fe-S protein 8                                 | 28   | 30   | 31   |
| 226139 | Cox15         | COX15 homolog, cytochrome c oxidase assembly protein (yeast)                   | 82   | 83   | 77   |
| 226153 | Peo1          | progressive external ophthalmoplegia 1 (human)                                 | 0    | 0    | 0    |
| 226527 | BC026585      | cDNA sequence BC026585                                                         | 0    | 0    | 0    |
| 226539 | Dars2         | aspartyl-tRNA synthetase 2 (mitochondrial)                                     | 43   | 41   | 42   |
| 226646 | Ndufs2        | NADH dehydrogenase (ubiquinone) Fe-S protein 2                                 | 20   | 20   | 20   |
| 226654 | EG226654      | predicted gene, EG226654                                                       | 0    | 0    | 0    |
| 227095 | Hibch         | 3-hydroxyisobutyryl-Coenzyme A hydrolase                                       | 177  | 180  | 177  |
| 227197 | Ndufs1        | NADH dehydrogenase (ubiquinone) Fe-S protein 1                                 | 83   | 80   | 78   |
| 227231 | Cps1          | carbamoyl-phosphate synthetase 1                                               | 2605 | 2653 | 2597 |
| 227683 | Coq4          | coenzyme Q4 homolog (yeast)                                                    | 20   | 22   | 20   |
| 227731 | Slc25a25      | solute carrier family 25 (mitochondrial carrier, phosphate carrier), member 25 | 187  | 188  | 183  |

|        |               |                                                                                                                                      |     |      |      |
|--------|---------------|--------------------------------------------------------------------------------------------------------------------------------------|-----|------|------|
| 228026 | Pdk1          | pyruvate dehydrogenase kinase, isoenzyme 1                                                                                           | 272 | 249  | 263  |
| 228033 | Atp5g3        | ATP synthase, H+ transporting, mitochondrial F0 complex, subunit c (subunit 9), isoform 3                                            | 890 | 892  | 911  |
| 228061 | Agps          | alkylglycerone phosphate synthase                                                                                                    | 309 | 297  | 295  |
| 228607 | D430028G21Rik | RIKEN cDNA D430028G21 gene                                                                                                           | 0   | 0    | 0    |
| 228715 | Gm561         | gene model 561, (NCBI)                                                                                                               | 0   | 0    | 0    |
| 228859 | D930001I22Rik | RIKEN cDNA D930001I22 gene                                                                                                           | 0   | 0    | 0    |
| 229211 | Acad9         | acyl-Coenzyme A dehydrogenase family, member 9                                                                                       | 127 | 126  | 125  |
| 229487 | Pet112l       | PET112-like (yeast)                                                                                                                  | 994 | 1016 | 1000 |
| 229517 | Slc25a44      | solute carrier family 25, member 44                                                                                                  | 57  | 58   | 58   |
| 229731 | Slc25a24      | solute carrier family 25 (mitochondrial carrier, phosphate carrier), member 24                                                       | 322 | 339  | 329  |
| 229905 | Ccbl2         | cysteine conjugate-beta lyase 2                                                                                                      | 183 | 193  | 195  |
| 230027 | Coq3          | coenzyme Q3 homolog, methyltransferase (yeast)                                                                                       | 106 | 105  | 109  |
| 230075 | Ndufb6        | NADH dehydrogenase (ubiquinone) 1 beta subcomplex, 6                                                                                 | 265 | 268  | 253  |
| 230125 | Mcart1        | mitochondrial carrier triple repeat 1                                                                                                | 231 | 237  | 235  |
| 230577 | Pars2         | prolyl-tRNA synthetase (mitochondrial)(putative)                                                                                     | 68  | 72   | 77   |
| 230598 | Nrd1          | nardilysin, N-arginine dibasic convertase, NRD convertase 1                                                                          | 179 | 178  | 179  |
| 230649 | Atpaf1        | ATP synthase mitochondrial F1 complex assembly factor 1                                                                              | 60  | 60   | 56   |
| 230935 | Dnajc11       | DnaJ (Hsp40) homolog, subfamily C, member 11                                                                                         | 160 | 159  | 170  |
| 231086 | Hadhb         | hydroxyacyl-Coenzyme A dehydrogenase/3-ketoacyl-Coenzyme A thiolase/enoyl-Coenzyme A hydratase (trifunctional protein), beta subunit | 20  | 17   | 23   |
| 231279 | Guf1          | GUF1 GTPase homolog (S. cerevisiae)                                                                                                  | 64  | 65   | 63   |
| 231287 | Atp10d        | ATPase, Class V, type 10D                                                                                                            | 432 | 436  | 437  |
| 231413 | Grsf1         | G-rich RNA sequence binding factor 1                                                                                                 | 181 | 168  | 178  |
| 231430 | Cox18         | COX18 cytochrome c oxidase assembly homolog (S. cerevisiae)                                                                          | 626 | 605  | 613  |
| 232339 | Ankrd26       | ankyrin repeat domain 26                                                                                                             | 820 | 825  | 817  |
| 232536 | Mrps35        | mitochondrial ribosomal protein S35                                                                                                  | 68  | 71   | 68   |
| 232664 | 4921511K06Rik | RIKEN cDNA 4921511K06 gene                                                                                                           | 0   | 0    | 0    |
| 233189 | Atpbd3        | ATP binding domain 3                                                                                                                 | 0   | 0    | 0    |

|        |               |                                                                                       |      |      |      |
|--------|---------------|---------------------------------------------------------------------------------------|------|------|------|
| 233799 | Acsm2         | acyl-CoA synthetase medium-chain family member 2                                      | 0    | 0    | 0    |
| 233801 | BC048390      | cDNA sequence BC048390                                                                | 0    | 0    | 0    |
| 233870 | Tufm          | Tu translation elongation factor, mitochondrial                                       | 33   | 33   | 34   |
| 234309 | Cbr4          | carbonyl reductase 4                                                                  | 879  | 876  | 867  |
| 234384 | BC051227      | cDNA sequence BC051227                                                                | 0    | 0    | 0    |
| 234847 | Spg7          | spastic paraplegia 7 homolog (human)                                                  | 75   | 79   | 76   |
| 235169 | Foxred1       | FAD-dependent oxidoreductase domain containing 1                                      | 13   | 12   | 13   |
| 235339 | Dlat          | dihydrolipoamide S-acetyltransferase (E2 component of pyruvate dehydrogenase complex) | 144  | 141  | 145  |
| 235442 | Rab8b         | RAB8B, member RAS oncogene family                                                     | 137  | 145  | 140  |
| 235582 | 6230410P16Rik | RIKEN cDNA 6230410P16 gene                                                            | 0    | 0    | 0    |
| 235674 | Acaa1b        | acetyl-Coenzyme A acyltransferase 1B                                                  | 0    | 0    | 0    |
| 236900 | Pdk3          | pyruvate dehydrogenase kinase, isoenzyme 3                                            | 0    | 0    | 0    |
| 237880 | 1700071K01Rik | RIKEN cDNA 1700071K01 gene                                                            | 0    | 0    | 0    |
| 237926 | Rsad1         | radical S-adenosyl methionine domain containing 1                                     | 55   | 53   | 53   |
| 239017 | Ogdhl         | oxoglutarate dehydrogenase-like                                                       | 235  | 231  | 241  |
| 239555 | Smcr7l        | Smith-Magenis syndrome chromosome region, candidate 7-like (human)                    | 115  | 101  | 113  |
| 240025 | Dact2         | dapper homolog 2, antagonist of beta-catenin (xenopus)                                | 435  | 426  | 436  |
| 240549 | LOC240549     | similar to arylacetyl acyl-CoA N-acyltransferase                                      | 0    | 0    | 0    |
| 240853 | EG240853      | predicted gene, EG240853                                                              | 0    | 0    | 0    |
| 241159 | Neu4          | sialidase 4                                                                           | 0    | 0    | 0    |
| 241516 | Fsip2         | fibrous sheath-interacting protein 2                                                  | 0    | 0    | 0    |
| 241656 | Pak7          | p21 (CDKN1A)-activated kinase 7                                                       | 598  | 625  | 589  |
| 241727 | Snph          | syntaphilin                                                                           | 125  | 125  | 122  |
| 243382 | Ppm1k         | protein phosphatase 1K (PP2C domain containing)                                       | 193  | 189  | 184  |
| 243931 | Tshz3         | teashirt zinc finger family member 3                                                  | 2506 | 2524 | 2480 |
| 243996 | 4933405O20Rik | RIKEN cDNA 4933405O20 gene                                                            | 0    | 0    | 0    |
| 244141 | Nars2         | asparaginyl-tRNA synthetase 2 (mitochondrial)(putative)                               | 1066 | 1073 | 1070 |

|        |               |                                                                  |      |      |      |
|--------|---------------|------------------------------------------------------------------|------|------|------|
| 244562 | Abcc12        | ATP-binding cassette, sub-family C (CFTR/MRP), member 12         | 1015 | 1017 | 1010 |
| 244954 | Prss35        | protease, serine, 35                                             | 183  | 192  | 193  |
| 245347 | EG245347      | predicted gene, EG245347                                         | 0    | 0    | 0    |
| 245651 | EG245651      | predicted gene, EG245651                                         | 0    | 0    | 0    |
| 246221 | Mpst          | mercaptopyruvate sulfurtransferase                               | 30   | 29   | 27   |
| 246696 | Slc25a28      | solute carrier family 25, member 28                              | 97   | 102  | 105  |
| 246703 | Apoa1bp       | apolipoprotein A-I binding protein                               | 45   | 47   | 46   |
| 246782 | Atpaf2        | ATP synthase mitochondrial F1 complex assembly factor 2          | 80   | 83   | 90   |
| 257633 | BC021611      | cDNA sequence BC021611                                           | 0    | 0    | 0    |
| 257635 | Sdsl          | serine dehydratase-like                                          | 53   | 54   | 51   |
| 264895 | BC018371      | cDNA sequence BC018371                                           | 0    | 0    | 0    |
| 267019 | Rps15a        | ribosomal protein S15a                                           | 0    | 0    | 0    |
| 268782 | Agxt2         | alanine-glyoxylate aminotransferase 2                            | 367  | 376  | 371  |
| 268822 | Adck5         | aarF domain containing kinase 5                                  | 96   | 87   | 89   |
| 268860 | Abat          | 4-aminobutyrate aminotransferase                                 | 217  | 211  | 223  |
| 269951 | Idh2          | isocitrate dehydrogenase 2 (NADP+), mitochondrial                | 160  | 161  | 159  |
| 270076 | Gcdh          | glutaryl-Coenzyme A dehydrogenase                                | 39   | 34   | 37   |
| 270151 | BC034204      | cDNA sequence BC034204                                           | 0    | 0    | 0    |
| 270166 | Clpx          | caseinolytic peptidase X (E.coli)                                | 102  | 105  | 105  |
| 270685 | Mthfd1l       | methylenetetrahydrofolate dehydrogenase (NADP+ dependent) 1-like | 515  | 521  | 500  |
| 272428 | C730027J19Rik | RIKEN cDNA C730027J19 gene                                       | 0    | 0    | 0    |
| 280408 | Rilp          | Rab interacting lysosomal protein                                | 30   | 34   | 30   |
| 319518 | 4930402E16Rik | RIKEN cDNA 4930402E16 gene                                       | 0    | 0    | 0    |
| 319554 | Idi1          | isopentenyl-diphosphate delta isomerase                          | 106  | 107  | 102  |
| 319653 | Slc25a40      | solute carrier family 25, member 40                              | 249  | 264  | 242  |
| 320262 | A830073O21Rik | RIKEN cDNA A830073O21 gene                                       | 0    | 0    | 0    |
| 320635 | Cyb5r2        | cytochrome b5 reductase 2                                        | 253  | 250  | 243  |

|                      |                                                                  |     |     |     |
|----------------------|------------------------------------------------------------------|-----|-----|-----|
| 320717 Pptc7         | PTC7 protein phosphatase homolog ( <i>S. cerevisiae</i> )        | 120 | 114 | 117 |
| 320769 Prdx6-rs1     | peroxiredoxin 6, related sequence 1                              | 0   | 0   | 0   |
| 320806 Gfm2          | G elongation factor, mitochondrial 2                             | 84  | 81  | 79  |
| 320808 Wdr22         | WD repeat domain 22                                              | 0   | 0   | 0   |
| 320951 Pisd          | phosphatidylserine decarboxylase                                 | 257 | 261 | 258 |
| 321003 Xpnpep3       | X-prolyl aminopeptidase (aminopeptidase P) 3, putative           | 0   | 0   | 0   |
| 328258 AU042651      | expressed sequence AU042651                                      | 0   | 0   | 0   |
| 329384 Pthr1         | peptidyl-tRNA hydrolase 1 homolog ( <i>S. cerevisiae</i> )       | 8   | 12  | 10  |
| 331026 Gmppb         | GDP-mannose pyrophosphorylase B                                  | 67  | 64  | 67  |
| 333182 Cox6b2        | cytochrome c oxidase subunit VIb polypeptide 2                   | 0   | 0   | 0   |
| 338350 9330129D05Rik | RIKEN cDNA 9330129D05 gene                                       | 0   | 0   | 0   |
| 338359 Supv31        | suppressor of var1, 3-like 1 ( <i>S. cerevisiae</i> )            | 53  | 46  | 44  |
| 353172 Gars          | glycyl-tRNA synthetase                                           | 194 | 190 | 171 |
| 353242 Mrpl21        | mitochondrial ribosomal protein L21                              | 54  | 46  | 49  |
| 353371 Oxct2b        | 3-oxoacid CoA transferase 2B                                     | 0   | 0   | 0   |
| 380660 8430416H19Rik | RIKEN cDNA 8430416H19 gene                                       | 0   | 0   | 0   |
| 380773 1810035L17Rik | RIKEN cDNA 1810035L17 gene                                       | 0   | 0   | 0   |
| 380836 Mrs2l         | MRS2-like, magnesium homeostasis factor ( <i>S. cerevisiae</i> ) | 0   | 0   | 0   |
| 380840 Lyrn4         | LYR motif containing 4                                           | 191 | 191 | 193 |
| 381038 Parl          | presenilin associated, rhomboid-like                             | 107 | 107 | 111 |
| 381045 Ccdc58        | coiled-coil domain containing 58                                 | 91  | 89  | 87  |
| 381110 AW061290      | expressed sequence AW061290                                      | 0   | 0   | 0   |
| 381314 lars2         | isoleucine-tRNA synthetase 2, mitochondrial                      | 21  | 23  | 21  |
| 381511 Ppm2c         | protein phosphatase 2C, magnesium dependent, catalytic subunit   | 0   | 0   | 0   |
| 381760 Ssbp1         | single-stranded DNA binding protein 1                            | 63  | 64  | 60  |
| 382051 4833426J09Rik | RIKEN cDNA 4833426J09 gene                                       | 0   | 0   | 0   |
| 382117 D9Erttd402e   | DNA segment, Chr 9, ERATO Doi 402, expressed                     | 0   | 0   | 0   |

|        |               |                                                                                                                                                 |     |    |     |
|--------|---------------|-------------------------------------------------------------------------------------------------------------------------------------------------|-----|----|-----|
| 384071 | Slc25a34      | solute carrier family 25, member 34                                                                                                             | 57  | 56 | 57  |
| 384281 | 2010003O18Rik | RIKEN cDNA 2010003O18 gene                                                                                                                      | 0   | 0  | 0   |
| 387314 | BC023818      | cDNA sequence BC023818                                                                                                                          | 0   | 0  | 0   |
| 403187 | Opa3          | optic atrophy 3 (human)                                                                                                                         | 77  | 66 | 77  |
| 407785 | Ndufs6        | NADH dehydrogenase (ubiquinone) Fe-S protein 6                                                                                                  | 89  | 96 | 93  |
| 432551 | Hspd1         | chaperonin                                                                                                                                      | 45  | 43 | 45  |
| 432676 | EG432676      | predicted gene, EG432676                                                                                                                        | 0   | 0  | 0   |
| 432732 | AK157302      | cDNA sequence AK157302                                                                                                                          | 0   | 0  | 0   |
| 432822 | EG432822      | predicted gene, EG432822                                                                                                                        | 0   | 0  | 0   |
| 433229 | EG433229      | predicted gene, EG433229                                                                                                                        | 0   | 0  | 0   |
| 433256 | Acsl5         | acyl-CoA synthetase long-chain family member 5                                                                                                  | 103 | 90 | 94  |
| 433326 | EG433326      | predicted gene, EG433326                                                                                                                        | 0   | 0  | 0   |
| 433470 | AA467197      | expressed sequence AA467197                                                                                                                     | 0   | 0  | 0   |
| 433771 | 2310028O11Rik | RIKEN cDNA 2310028O11 gene                                                                                                                      | 0   | 0  | 0   |
| 433923 | EG433923      | predicted gene, EG433923                                                                                                                        | 0   | 0  | 0   |
| 433968 | EG433968      | predicted gene, EG433968                                                                                                                        | 0   | 0  | 0   |
| 434437 | EG434437      | predicted gene, EG434437                                                                                                                        | 0   | 0  | 0   |
| 545725 | Mterf         | mitochondrial transcription termination factor                                                                                                  | 102 | 99 | 100 |
| 546368 | EG546368      | predicted gene, EG546368                                                                                                                        | 0   | 0  | 0   |
| 547412 | LOC547412     | hypothetical LOC547412                                                                                                                          | 0   | 0  | 0   |
| 595136 | Ndufs5        | NADH dehydrogenase (ubiquinone) Fe-S protein 5                                                                                                  | 43  | 43 | 40  |
| 620637 | LOC620637     | hypothetical LOC620637                                                                                                                          | 0   | 0  | 0   |
| 621381 | EG621381      | predicted gene, EG621381                                                                                                                        | 0   | 0  | 0   |
| 622178 | EG622178      | predicted gene, EG622178                                                                                                                        | 0   | 0  | 0   |
| 622268 | EG622268      | predicted gene, EG622268                                                                                                                        | 0   | 0  | 0   |
| 622958 | EG622958      | predicted gene, EG622958                                                                                                                        | 0   | 0  | 0   |
| 623031 | LOC623031     | similar to hydroxyacyl-Coenzyme A dehydrogenase/3-ketoacyl-Coenzyme A thiolase/enoyl-Coenzyme A hydratase (trifunctional protein), beta subunit | 0   | 0  | 0   |

|        |           |                                                                                                                                                                                                                        |    |    |    |
|--------|-----------|------------------------------------------------------------------------------------------------------------------------------------------------------------------------------------------------------------------------|----|----|----|
| 623133 | EG623133  | predicted gene, EG623133                                                                                                                                                                                               | 0  | 0  | 0  |
| 623402 | EG623402  | predicted gene, EG623402                                                                                                                                                                                               | 0  | 0  | 0  |
| 623661 | EG623661  | predicted gene, EG623661                                                                                                                                                                                               | 0  | 0  | 0  |
| 623924 | EG623924  | predicted gene, EG623924                                                                                                                                                                                               | 0  | 0  | 0  |
| 624814 | LOC624814 | similar to NADH dehydrogenase (ubiquinone) Fe-S protein 3                                                                                                                                                              | 0  | 0  | 0  |
| 625167 | EG625167  | predicted gene, EG625167                                                                                                                                                                                               | 0  | 0  | 0  |
| 625249 | Gpx4      | glutathione peroxidase 4                                                                                                                                                                                               | 76 | 69 | 74 |
| 627557 | EG627557  | predicted gene, EG627557                                                                                                                                                                                               | 0  | 0  | 0  |
| 628438 | EG628438  | predicted gene, EG628438                                                                                                                                                                                               | 0  | 0  | 0  |
| 636544 | EG636544  | predicted gene, EG636544                                                                                                                                                                                               | 0  | 0  | 0  |
| 637273 | EG637273  | predicted gene, EG637273                                                                                                                                                                                               | 0  | 0  | 0  |
| 641376 | Tomm40l   | translocase of outer mitochondrial membrane 40 homolog-like (yeast)                                                                                                                                                    | 15 | 13 | 15 |
| 664994 | Isoc2a    | isochorismatase domain containing 2a                                                                                                                                                                                   | 0  | 0  | 0  |
| 665367 | LOC665367 | similar to coiled-coil-helix-coiled-coil-helix domain containing 2                                                                                                                                                     | 0  | 0  | 0  |
| 665563 | LOC665563 | similar to methylenetetrahydrofolate dehydrogenase (NADP+ dependent) 2-like                                                                                                                                            | 0  | 0  | 0  |
| 665566 | LOC665566 | similar to ubiquitin carboxyl-terminal hydrolase 1 A (ubiquitin thiolesterase FAF-X) (Ubiquitin-specific-processing protease FAF-X) (Deubiquitinating enzyme FAF-X) (Fat facets protein-related, X-linked) (Ubiquitin- | 0  | 0  | 0  |
| 666366 | EG666366  | predicted gene, EG666366                                                                                                                                                                                               | 0  | 0  | 0  |
| 666538 | EG666538  | predicted gene, EG666538                                                                                                                                                                                               | 0  | 0  | 0  |
| 667008 | EG667008  | predicted gene, EG667008                                                                                                                                                                                               | 0  | 0  | 0  |
| 667103 | LOC667103 | similar to Brain protein 44-like protein                                                                                                                                                                               | 0  | 0  | 0  |
| 668378 | LOC668378 | similar to Protein FAM38A                                                                                                                                                                                              | 0  | 0  | 0  |
