# Supplementary material
Source: PubMed Central journal article supplement (PMC4439875)
Supplement: bph0172-2782-sd9.pdf [file bph0172-2782-sd9.pdf]

**SUPPLEMENTARY TABLE 5. Primer sequences.**

Forward (F) and reverse (R) primer sequences are given for primers used in qRT-PCR and qPCR.

| <b>Sequence Name</b> | <b>Sequence</b>               |
|----------------------|-------------------------------|
| Mef2b F              | GAT TGG GCA CCT CAA GAA GC    |
| Mef2b R              | CTC CTT GCA CAG ACT GCG G     |
| NRF1 F               | GGA CAT CCT CAA CTC CAC GG    |
| NRF1 R               | GGC TCT GAG TTT CCG AAG CA    |
| PPAR $\gamma$ F      | GAC GGG CTG AGG AGA AGT CA    |
| PPAR $\gamma$ R      | CCA TGG TAA TTT CAG TAA AGG G |
| PGC1 $\alpha$ F      | AGT GAC ATA GAG TGT GCT GCT C |
| PGC1 $\alpha$ R      | CGC AGG CTC ATT GTT GTA CTG   |
| nucleosome mapping F | CAG GGG ATC TTT GCT ATT TGC C |
| nucleosome mapping R | CTT CAA GCA TCA CAC TGT GAC   |
