# Supplementary material
Source: PubMed Central journal article supplement (PMC4439875)
Supplement: bph0172-2782-sd10.pdf [file bph0172-2782-sd10.pdf]

**SUPPLEMENTARY TABLE 6. Microarray gene symbol definitions.**

Gene definitions are shown for gene symbols used in presenting microarray data in Supplementary Figure S2.

| Muscle structure and contraction gene symbols |                                                                            | PPAR signaling gene symbols |                                                  |
|-----------------------------------------------|----------------------------------------------------------------------------|-----------------------------|--------------------------------------------------|
| Gene Symbol                                   | Gene Name                                                                  | Gene Symbol                 | Gene Name                                        |
| AACS                                          | acetoacetyl-CoA synthetase                                                 | ACAA1B                      | acetyl-Coenzyme A acyltransferase 1B             |
| ACSM3                                         | acyl-CoA synthetase medium-chain family member 3                           | ADIPOQ                      | adiponectin, C1Q and collagen domain containing  |
| ACSS2                                         | acyl-CoA synthetase short-chain family member 2                            | ANGPTL4                     | angiopoietin-like 4                              |
| ADPRHL1                                       | ADP-ribosylhydrolase like 1                                                | FABP4                       | fatty acid binding protein 4, adipocyte          |
| APOC1                                         | apolipoprotein C-I                                                         | PPARG                       | peroxisome proliferator activated receptor gamma |
| BDH1                                          | 3-hydroxybutyrate dehydrogenase, type 1                                    | SCD1                        | stearoyl-Coenzyme A desaturase 1                 |
| BLVRB                                         | biliverdin reductase B (flavin reductase (NADPH))                          |                             |                                                  |
| C1QB                                          | complement component 1, q subcomponent, beta polypeptide                   |                             |                                                  |
| CASP8                                         | caspase 8                                                                  |                             |                                                  |
| CEBPA                                         | CCAAT/enhancer binding protein (C/EBP), alpha                              |                             |                                                  |
| CERKL                                         | ceramide kinase-like                                                       |                             |                                                  |
| EGR1                                          | early growth response 1                                                    |                             |                                                  |
| ELOVL6                                        | ELOVL family member 6, elongation of long chain fatty acids (yeast)        |                             |                                                  |
| FKBP5                                         | FK506 binding protein 5                                                    |                             |                                                  |
| FOS                                           | FBJ osteosarcoma oncogene                                                  |                             |                                                  |
| FRZb                                          | frizzled-related protein                                                   |                             |                                                  |
| FZD9                                          | frizzled homolog 9 (Drosophila)                                            |                             |                                                  |
| LCP1                                          | lymphocyte cytosolic protein 1                                             |                             |                                                  |
| LDHB                                          | lactate dehydrogenase B                                                    |                             |                                                  |
| MMP3                                          | matrix metalloproteinase 3                                                 |                             |                                                  |
| MYH7                                          | myosin, heavy polypeptide 7, cardiac muscle, beta                          |                             |                                                  |
| MYL4                                          | myosin, light polypeptide 4                                                |                             |                                                  |
| NGP                                           | neutrophilic granule protein                                               |                             |                                                  |
| NUDT18                                        | nudix (nucleoside diphosphate linked moiety X)-type motif 18               |                             |                                                  |
| PCX                                           | pyruvate carboxylase                                                       |                             |                                                  |
| PTGER3                                        | prostaglandin E receptor 3 (subtype EP3)                                   |                             |                                                  |
| PYGL                                          | liver glycogen phosphorylase                                               |                             |                                                  |
| RETN                                          | resistin                                                                   |                             |                                                  |
| SFRP2                                         | secreted frizzled-related protein 2                                        |                             |                                                  |
| SVEP1                                         | sushi, von Willebrand factor type A, EGF and pentraxin domain containing 1 |                             |                                                  |
| THrsp                                         | thyroid hormone responsive SPOT14 homolog (Rattus)                         |                             |                                                  |
| TNFAIP8                                       | tumor necrosis factor, alpha-induced protein 8                             |                             |                                                  |
| TNNC1                                         | troponin C, cardiac/slow skeletal                                          |                             |                                                  |
| TUSC5                                         | tumor suppressor candidate 5                                               |                             |                                                  |
